# Supplementary material
Source: Elsevier journal article supplement (https://univ-rennes.hal.science/hal-01532174v1/file/mmc5.zip)
Supplement: mmc5 [file mmc5.zip]

Archive with 2 entries (2 files):
- Complex_9.cif
- CHECKCIF-complex_9.pdf
