# Supplementary material
Source: Elsevier journal article supplement (https://univ-rennes.hal.science/hal-01532174v1/file/mmc5.zip)
Supplement: mmc5 [file mmc5.zip › Complex_9.cif]

data_test
_audit_creation_date              2015-07-23
_audit_creation_method
;
Olex2 1.2
(compiled 2015.01.26 svn.r3150 for OlexSys, GUI svn.r4998)
;
_publ_contact_author_address      ?
_publ_contact_author_email        ?
_publ_contact_author_name         ''
_publ_contact_author_phone        ?
_publ_section_references
;
Dolomanov, O.V., Bourhis, L.J., Gildea, R.J, Howard, J.A.K. & Puschmann, H.
 (2009), J. Appl. Cryst. 42, 339-341.

Sheldrick, G.M. (2008). Acta Cryst. A64, 112-122.
;
_chemical_name_common             ?
_chemical_name_systematic
;
 ? 
;
_chemical_formula_moiety          'C23 H15 Cu F3 N2 O2, 2(C H4 O)'
_chemical_formula_sum             'C25 H23 Cu F3 N2 O4'
_chemical_formula_weight          535.99
_chemical_melting_point           ?
loop_
  _atom_type_symbol
  _atom_type_description
  _atom_type_scat_dispersion_real
  _atom_type_scat_dispersion_imag
  _atom_type_scat_source
 'C' 'C' 0.0033 0.0016 'International Tables Vol C Tables 4.2.6.8 and 6.1.1.4'
 'H' 'H' 0.0000 0.0000 'International Tables Vol C Tables 4.2.6.8 and 6.1.1.4'
 'Cu' 'Cu' 0.3201 1.2651 'International Tables Vol C Tables 4.2.6.8 and 6.1.1.4'
 'F' 'F' 0.0171 0.0103 'International Tables Vol C Tables 4.2.6.8 and 6.1.1.4'
 'N' 'N' 0.0061 0.0033 'International Tables Vol C Tables 4.2.6.8 and 6.1.1.4'
 'O' 'O' 0.0106 0.0060 'International Tables Vol C Tables 4.2.6.8 and 6.1.1.4'

_space_group_crystal_system       'triclinic'
_space_group_IT_number            2
_space_group_name_H-M_alt         'P -1'
_space_group_name_Hall            '-P 1'
loop_
  _space_group_symop_id
  _space_group_symop_operation_xyz
 1 'x, y, z'
 2 '-x, -y, -z'

_cell_length_a                    8.0752(3)
_cell_length_b                    11.5973(4)
_cell_length_c                    12.5377(4)
_cell_angle_alpha                 91.092(2)
_cell_angle_beta                  91.563(2)
_cell_angle_gamma                 98.749(2)
_cell_volume                      1159.75(7)
_cell_formula_units_Z             2
_cell_measurement_reflns_used     9889
_cell_measurement_temperature     296(2)
_cell_measurement_theta_max       26.35
_cell_measurement_theta_min       2.38
_exptl_absorpt_coefficient_mu     1.001
_exptl_absorpt_correction_T_max   1.0000
_exptl_absorpt_correction_T_min   0.8686
_exptl_absorpt_correction_type    numerical
_exptl_absorpt_process_details
'SADABS-2012/1 (Bruker,2012) was used for absorption correction. wR2(int) was 0.0527 before and 0.0449 after correction. The Ratio of minimum to maximum transmission is 0.8686. The \l/2 correction factor is 0.0015.'
_exptl_crystal_colour             'clear dark green'
_exptl_crystal_colour_lustre      clear
_exptl_crystal_colour_modifier    dark
_exptl_crystal_colour_primary     green
_exptl_crystal_density_diffrn     1.535
_exptl_crystal_density_meas       .
_exptl_crystal_density_method     'not measured'
_exptl_crystal_description        block
_exptl_crystal_F_000              550
_exptl_crystal_size_max           0.335
_exptl_crystal_size_mid           0.254
_exptl_crystal_size_min           0.132
_exptl_special_details
;
 ? 
;
_diffrn_reflns_av_R_equivalents   0.0295
_diffrn_reflns_av_unetI/netI      0.0087
_diffrn_reflns_limit_h_max        10
_diffrn_reflns_limit_h_min        -10
_diffrn_reflns_limit_k_max        14
_diffrn_reflns_limit_k_min        -14
_diffrn_reflns_limit_l_max        15
_diffrn_reflns_limit_l_min        -15
_diffrn_reflns_number             99600
_diffrn_reflns_theta_full         26.00
_diffrn_reflns_theta_max          26.44
_diffrn_reflns_theta_min          2.38
_diffrn_ambient_temperature       296.15
_diffrn_detector_area_resol_mean  ?
_diffrn_measured_fraction_theta_full 1.000
_diffrn_measured_fraction_theta_max 0.998
_diffrn_measurement_device_type   'Bruker APEX-II CCD'
_diffrn_measurement_method        '\f and \w scans'
_diffrn_radiation_monochromator   'graphite'
_diffrn_radiation_type            MoK\a
_diffrn_radiation_wavelength      0.71073
_diffrn_source                    'fine-focus sealed tube'
_diffrn_standards_number          0
_reflns_number_gt                 4386
_reflns_number_total              4766
_reflns_threshold_expression      >2sigma(I)
_computing_cell_refinement        'SAINT v8.27A (Bruker, 2012)'
_computing_data_collection        ?
_computing_data_reduction         'SAINT v8.27A (Bruker, 2012)'
_computing_molecular_graphics     'Olex2 (Dolomanov et al., 2009)'
_computing_publication_material   'Olex2 (Dolomanov et al., 2009)'
_computing_structure_refinement   'XL (Sheldrick, 2008)'
_computing_structure_solution     'XS (Sheldrick, 2008)'
_refine_diff_density_max          0.318
_refine_diff_density_min          -0.220
_refine_diff_density_rms          0.048
_refine_ls_extinction_coef        ?
_refine_ls_extinction_method      none
_refine_ls_goodness_of_fit_ref    1.060
_refine_ls_hydrogen_treatment     constr
_refine_ls_matrix_type            full
_refine_ls_number_parameters      321
_refine_ls_number_reflns          4766
_refine_ls_number_restraints      0
_refine_ls_R_factor_all           0.0295
_refine_ls_R_factor_gt            0.0261
_refine_ls_restrained_S_all       1.060
_refine_ls_shift/su_max           0.001
_refine_ls_shift/su_mean          0.000
_refine_ls_structure_factor_coef  Fsqd
_refine_ls_weighting_details
'calc w=1/[\s^2^(Fo^2^)+(0.0455P)^2^+0.3551P] where P=(Fo^2^+2Fc^2^)/3'
_refine_ls_weighting_scheme       calc
_refine_ls_wR_factor_gt           0.0737
_refine_ls_wR_factor_ref          0.0769
_refine_special_details
;
 Refinement of F^2^ against ALL reflections.  The weighted R-factor wR and 
 goodness of fit S are based on F^2^, conventional R-factors R are based 
 on F, with F set to zero for negative F^2^. The threshold expression of 
 F^2^ > 2sigma(F^2^) is used only for calculating R-factors(gt) etc. and is 
 not relevant to the choice of reflections for refinement.  R-factors based 
 on F^2^ are statistically about twice as large as those based on F, and R- 
 factors based on ALL data will be even larger. 
;
_olex2_refinement_description
;
1. Fixed Uiso
 At 1.2 times of:
  All C(H) groups
 At 1.5 times of:
  All C(H,H,H) groups, All O(H) groups
2.a Aromatic/amide H refined with riding coordinates:
 C1(H1), C2(H2), C4(H4), C5(H5), C8(H8), C12(H12), C13(H13), C14(H14),
 C15(H15), C17(H17), C21(H21), C23(H23)
2.b Idealised Me refined as rotating group:
 C10(H10A,H10B,H10C), C24(H24A,H24B,H24C), C25(H25A,H25B,H25C)
2.c Idealised tetrahedral OH refined as rotating group:
 O3(H3), O4(H4A)
;
_atom_sites_solution_hydrogens    geom
_atom_sites_solution_primary      heavy
_atom_sites_solution_secondary    difmap
loop_
  _atom_site_label
  _atom_site_type_symbol
  _atom_site_fract_x
  _atom_site_fract_y
  _atom_site_fract_z
  _atom_site_U_iso_or_equiv
  _atom_site_adp_type
  _atom_site_occupancy
  _atom_site_calc_flag
  _atom_site_disorder_assembly
  _atom_site_disorder_group
  _atom_site_refinement_flags_posn
 Cu1 Cu 0.59511(2) 0.530171(15) 0.686139(13) 0.03411(8) Uani 1 d . . .
 F1 F 0.85573(19) 0.03246(10) 0.29241(10) 0.0705(4) Uani 1 d . . .
 F2 F 0.41149(17) 0.20290(9) 0.87101(10) 0.0634(3) Uani 1 d . . .
 F3 F 0.10698(17) 0.38916(12) 1.11700(10) 0.0708(4) Uani 1 d . . .
 O1 O 0.69304(17) 0.42178(10) 0.60295(9) 0.0446(3) Uani 1 d . . .
 O2 O 0.51531(15) 0.40228(9) 0.77478(9) 0.0401(3) Uani 1 d . . .
 N1 N 0.67743(16) 0.66351(11) 0.60020(10) 0.0341(3) Uani 1 d . . .
 N2 N 0.50059(16) 0.64251(11) 0.77242(10) 0.0336(3) Uani 1 d . . .
 C1 C 0.8752(2) 0.33819(15) 0.35761(14) 0.0421(4) Uani 1 d . . .
 H1 H 0.9213 0.4102 0.3317 0.050 Uiso 1 calc . . R
 C2 C 0.9011(2) 0.23679(17) 0.30459(15) 0.0496(4) Uani 1 d . . .
 H2 H 0.9640 0.2401 0.2434 0.060 Uiso 1 calc . . R
 C3 C 0.8325(2) 0.13202(15) 0.34413(14) 0.0473(4) Uani 1 d . . .
 C4 C 0.7418(3) 0.12273(15) 0.43551(15) 0.0487(4) Uani 1 d . . .
 H4 H 0.6978 0.0501 0.4612 0.058 Uiso 1 calc . . R
 C5 C 0.7177(2) 0.22433(15) 0.48820(13) 0.0429(4) Uani 1 d . . .
 H5 H 0.6583 0.2197 0.5509 0.052 Uiso 1 calc . . R
 C6 C 0.78045(19) 0.33344(14) 0.44951(12) 0.0352(3) Uani 1 d . . .
 C7 C 0.74024(19) 0.43912(14) 0.50666(12) 0.0354(3) Uani 1 d . . .
 C8 C 0.7463(2) 0.54413(14) 0.45487(13) 0.0384(3) Uani 1 d . . .
 H8 H 0.7718 0.5434 0.3830 0.046 Uiso 1 calc . . R
 C9 C 0.7178(2) 0.65240(13) 0.49916(12) 0.0361(3) Uani 1 d . . .
 C10 C 0.7309(3) 0.75110(15) 0.42149(14) 0.0503(4) Uani 1 d . . .
 H10A H 0.6558 0.8041 0.4412 0.075 Uiso 1 calc . . GR
 H10B H 0.7014 0.7202 0.3508 0.075 Uiso 1 calc . . GR
 H10C H 0.8437 0.7918 0.4231 0.075 Uiso 1 calc . . GR
 C11 C 0.6597(2) 0.76976(13) 0.65294(12) 0.0360(3) Uani 1 d . . .
 C12 C 0.7423(2) 0.88063(14) 0.62966(14) 0.0450(4) Uani 1 d . . .
 H12 H 0.8178 0.8894 0.5746 0.054 Uiso 1 calc . . R
 C13 C 0.7127(3) 0.97761(15) 0.68797(16) 0.0524(4) Uani 1 d . . .
 H13 H 0.7671 1.0512 0.6709 0.063 Uiso 1 calc . . R
 C14 C 0.6034(3) 0.96632(15) 0.77112(16) 0.0541(5) Uani 1 d . . .
 H14 H 0.5799 1.0324 0.8074 0.065 Uiso 1 calc . . R
 C15 C 0.5289(2) 0.85708(15) 0.80044(14) 0.0468(4) Uani 1 d . . .
 H15 H 0.4592 0.8490 0.8585 0.056 Uiso 1 calc . . R
 C16 C 0.5585(2) 0.75884(13) 0.74283(12) 0.0364(3) Uani 1 d . . .
 C17 C 0.3991(2) 0.61873(14) 0.84969(12) 0.0372(3) Uani 1 d . . .
 H17 H 0.3540 0.6803 0.8802 0.045 Uiso 1 calc . . R
 C18 C 0.3506(2) 0.50519(14) 0.89198(12) 0.0363(3) Uani 1 d . . .
 C19 C 0.4134(2) 0.40488(13) 0.85375(12) 0.0348(3) Uani 1 d . . .
 C20 C 0.3584(2) 0.30075(14) 0.90786(14) 0.0413(3) Uani 1 d . . .
 C21 C 0.2574(2) 0.29364(16) 0.99371(14) 0.0463(4) Uani 1 d . . .
 H21 H 0.2259 0.2232 1.0273 0.056 Uiso 1 calc . . R
 C22 C 0.2036(2) 0.39496(17) 1.02887(14) 0.0473(4) Uani 1 d . . .
 C23 C 0.2448(2) 0.49810(16) 0.98070(14) 0.0436(4) Uani 1 d . . .
 H23 H 0.2040 0.5641 1.0056 0.052 Uiso 1 calc . . R
 O3 O 0.7703(2) 0.26032(14) 0.80188(15) 0.0703(4) Uani 1 d . . .
 H3 H 0.7022 0.3030 0.7851 0.105 Uiso 1 calc . . GR
 C24 C 0.9285(3) 0.3081(2) 0.7678(2) 0.0712(6) Uani 1 d . . .
 H24A H 0.9261 0.3121 0.6913 0.107 Uiso 1 calc . . GR
 H24B H 1.0091 0.2599 0.7901 0.107 Uiso 1 calc . . GR
 H24C H 0.9593 0.3851 0.7984 0.107 Uiso 1 calc . . GR
 O4 O 0.7676(3) 0.18524(18) 1.00820(15) 0.0999(7) Uani 1 d . . .
 H4A H 0.7733 0.2077 0.9466 0.150 Uiso 1 calc . . GR
 C25 C 0.8269(5) 0.0825(3) 1.0147(2) 0.0966(10) Uani 1 d . . .
 H25A H 0.8885 0.0704 0.9521 0.145 Uiso 1 calc . . GR
 H25B H 0.7348 0.0201 1.0198 0.145 Uiso 1 calc . . GR
 H25C H 0.8994 0.0841 1.0768 0.145 Uiso 1 calc . . GR

loop_
  _atom_site_aniso_label
  _atom_site_aniso_U_11
  _atom_site_aniso_U_22
  _atom_site_aniso_U_33
  _atom_site_aniso_U_23
  _atom_site_aniso_U_13
  _atom_site_aniso_U_12
 Cu1 0.04685(13) 0.02796(11) 0.02953(11) 0.00386(7) 0.00539(8) 0.01103(8)
 F1 0.1037(10) 0.0479(6) 0.0643(7) -0.0140(5) 0.0130(7) 0.0252(6)
 F2 0.0865(8) 0.0347(5) 0.0730(8) 0.0116(5) 0.0281(6) 0.0164(5)
 F3 0.0799(8) 0.0756(8) 0.0586(7) 0.0139(6) 0.0373(6) 0.0102(7)
 O1 0.0677(8) 0.0373(6) 0.0342(6) 0.0074(5) 0.0128(5) 0.0222(5)
 O2 0.0560(7) 0.0315(5) 0.0356(6) 0.0057(4) 0.0112(5) 0.0131(5)
 N1 0.0408(7) 0.0279(6) 0.0342(6) 0.0022(5) 0.0022(5) 0.0070(5)
 N2 0.0427(7) 0.0289(6) 0.0303(6) 0.0018(5) -0.0007(5) 0.0093(5)
 C1 0.0461(9) 0.0396(8) 0.0419(8) 0.0038(7) 0.0093(7) 0.0091(7)
 C2 0.0578(11) 0.0521(10) 0.0420(9) 0.0001(8) 0.0135(8) 0.0163(8)
 C3 0.0610(11) 0.0404(9) 0.0435(9) -0.0071(7) -0.0013(8) 0.0191(8)
 C4 0.0641(11) 0.0364(8) 0.0473(10) 0.0061(7) 0.0048(8) 0.0119(8)
 C5 0.0543(10) 0.0403(9) 0.0369(8) 0.0067(7) 0.0094(7) 0.0138(7)
 C6 0.0377(8) 0.0368(8) 0.0330(7) 0.0024(6) 0.0000(6) 0.0115(6)
 C7 0.0388(8) 0.0367(8) 0.0322(7) 0.0024(6) 0.0028(6) 0.0102(6)
 C8 0.0474(9) 0.0366(8) 0.0322(7) 0.0032(6) 0.0069(6) 0.0082(7)
 C9 0.0407(8) 0.0328(7) 0.0349(8) 0.0061(6) 0.0038(6) 0.0047(6)
 C10 0.0761(13) 0.0357(8) 0.0390(9) 0.0077(7) 0.0097(8) 0.0063(8)
 C11 0.0434(8) 0.0294(7) 0.0356(7) 0.0017(6) -0.0042(6) 0.0079(6)
 C12 0.0549(10) 0.0338(8) 0.0453(9) 0.0038(7) 0.0017(7) 0.0030(7)
 C13 0.0725(12) 0.0279(8) 0.0543(11) 0.0026(7) -0.0029(9) 0.0008(8)
 C14 0.0815(13) 0.0315(8) 0.0502(10) -0.0063(7) -0.0032(9) 0.0137(8)
 C15 0.0650(11) 0.0364(8) 0.0408(9) -0.0019(7) 0.0032(8) 0.0139(8)
 C16 0.0459(8) 0.0296(7) 0.0343(7) 0.0006(6) -0.0047(6) 0.0092(6)
 C17 0.0452(8) 0.0354(8) 0.0332(7) -0.0010(6) 0.0012(6) 0.0130(6)
 C18 0.0400(8) 0.0386(8) 0.0310(7) 0.0014(6) 0.0006(6) 0.0082(6)
 C19 0.0408(8) 0.0356(8) 0.0285(7) 0.0030(6) -0.0007(6) 0.0072(6)
 C20 0.0464(9) 0.0362(8) 0.0416(8) 0.0047(6) 0.0019(7) 0.0067(7)
 C21 0.0476(9) 0.0463(9) 0.0438(9) 0.0125(7) 0.0034(7) 0.0014(7)
 C22 0.0447(9) 0.0580(11) 0.0386(9) 0.0058(8) 0.0107(7) 0.0041(8)
 C23 0.0446(9) 0.0481(9) 0.0397(8) 0.0005(7) 0.0075(7) 0.0111(7)
 O3 0.0651(9) 0.0637(9) 0.0889(11) 0.0291(8) 0.0176(8) 0.0257(7)
 C24 0.0561(12) 0.0937(18) 0.0634(13) 0.0133(12) 0.0008(10) 0.0089(12)
 O4 0.161(2) 0.0844(13) 0.0671(11) 0.0032(9) 0.0362(13) 0.0535(13)
 C25 0.135(3) 0.097(2) 0.0687(16) -0.0068(15) -0.0101(17) 0.055(2)

_geom_special_details
;
 All esds (except the esd in the dihedral angle between two l.s. planes) 
 are estimated using the full covariance matrix.  The cell esds are taken 
 into account individually in the estimation of esds in distances, angles 
 and torsion angles; correlations between esds in cell parameters are only 
 used when they are defined by crystal symmetry.  An approximate (isotropic) 
 treatment of cell esds is used for estimating esds involving l.s. planes. 
;
loop_
  _geom_bond_atom_site_label_1
  _geom_bond_atom_site_label_2
  _geom_bond_distance
  _geom_bond_site_symmetry_2
  _geom_bond_publ_flag
 Cu1 O1 1.8950(11) . ?
 Cu1 O2 1.9134(11) . ?
 Cu1 N1 1.9452(13) . ?
 Cu1 N2 1.9350(12) . ?
 F1 C3 1.354(2) . ?
 F2 C20 1.351(2) . ?
 F3 C22 1.367(2) . ?
 O1 C7 1.2861(19) . ?
 O2 C19 1.3074(19) . ?
 N1 C9 1.325(2) . ?
 N1 C11 1.4157(19) . ?
 N2 C16 1.419(2) . ?
 N2 C17 1.293(2) . ?
 C1 H1 0.9300 . ?
 C1 C2 1.386(2) . ?
 C1 C6 1.398(2) . ?
 C2 H2 0.9300 . ?
 C2 C3 1.365(3) . ?
 C3 C4 1.374(3) . ?
 C4 H4 0.9300 . ?
 C4 C5 1.382(2) . ?
 C5 H5 0.9300 . ?
 C5 C6 1.391(2) . ?
 C6 C7 1.491(2) . ?
 C7 C8 1.386(2) . ?
 C8 H8 0.9300 . ?
 C8 C9 1.416(2) . ?
 C9 C10 1.510(2) . ?
 C10 H10A 0.9600 . ?
 C10 H10B 0.9600 . ?
 C10 H10C 0.9600 . ?
 C11 C12 1.396(2) . ?
 C11 C16 1.406(2) . ?
 C12 H12 0.9300 . ?
 C12 C13 1.384(3) . ?
 C13 H13 0.9300 . ?
 C13 C14 1.380(3) . ?
 C14 H14 0.9300 . ?
 C14 C15 1.378(3) . ?
 C15 H15 0.9300 . ?
 C15 C16 1.392(2) . ?
 C17 H17 0.9300 . ?
 C17 C18 1.432(2) . ?
 C18 C19 1.419(2) . ?
 C18 C23 1.417(2) . ?
 C19 C20 1.414(2) . ?
 C20 C21 1.364(2) . ?
 C21 H21 0.9300 . ?
 C21 C22 1.382(3) . ?
 C22 C23 1.350(3) . ?
 C23 H23 0.9300 . ?
 O3 H3 0.8200 . ?
 O3 C24 1.395(3) . ?
 C24 H24A 0.9600 . ?
 C24 H24B 0.9600 . ?
 C24 H24C 0.9600 . ?
 O4 H4A 0.8200 . ?
 O4 C25 1.353(3) . ?
 C25 H25A 0.9600 . ?
 C25 H25B 0.9600 . ?
 C25 H25C 0.9600 . ?

loop_
  _geom_angle_atom_site_label_1
  _geom_angle_atom_site_label_2
  _geom_angle_atom_site_label_3
  _geom_angle
  _geom_angle_site_symmetry_1
  _geom_angle_site_symmetry_3
  _geom_angle_publ_flag
 O1 Cu1 O2 86.75(5) . . ?
 O1 Cu1 N1 94.76(5) . . ?
 O1 Cu1 N2 178.58(5) . . ?
 O2 Cu1 N1 178.11(5) . . ?
 O2 Cu1 N2 93.68(5) . . ?
 N2 Cu1 N1 84.78(5) . . ?
 C7 O1 Cu1 124.15(10) . . ?
 C19 O2 Cu1 126.08(10) . . ?
 C9 N1 Cu1 122.52(10) . . ?
 C9 N1 C11 125.39(13) . . ?
 C11 N1 Cu1 111.21(10) . . ?
 C16 N2 Cu1 111.87(10) . . ?
 C17 N2 Cu1 126.01(11) . . ?
 C17 N2 C16 122.11(13) . . ?
 C2 C1 H1 119.6 . . ?
 C2 C1 C6 120.79(16) . . ?
 C6 C1 H1 119.6 . . ?
 C1 C2 H2 120.7 . . ?
 C3 C2 C1 118.60(16) . . ?
 C3 C2 H2 120.7 . . ?
 F1 C3 C2 119.09(17) . . ?
 F1 C3 C4 118.12(17) . . ?
 C2 C3 C4 122.78(16) . . ?
 C3 C4 H4 120.9 . . ?
 C3 C4 C5 118.13(16) . . ?
 C5 C4 H4 120.9 . . ?
 C4 C5 H5 119.3 . . ?
 C4 C5 C6 121.42(16) . . ?
 C6 C5 H5 119.3 . . ?
 C1 C6 C7 123.35(14) . . ?
 C5 C6 C1 118.21(15) . . ?
 C5 C6 C7 118.42(14) . . ?
 O1 C7 C6 114.54(13) . . ?
 O1 C7 C8 124.68(14) . . ?
 C8 C7 C6 120.69(14) . . ?
 C7 C8 H8 116.4 . . ?
 C7 C8 C9 127.26(15) . . ?
 C9 C8 H8 116.4 . . ?
 N1 C9 C8 121.76(14) . . ?
 N1 C9 C10 123.45(14) . . ?
 C8 C9 C10 114.76(14) . . ?
 C9 C10 H10A 109.5 . . ?
 C9 C10 H10B 109.5 . . ?
 C9 C10 H10C 109.5 . . ?
 H10A C10 H10B 109.5 . . ?
 H10A C10 H10C 109.5 . . ?
 H10B C10 H10C 109.5 . . ?
 C12 C11 N1 126.53(15) . . ?
 C12 C11 C16 117.94(15) . . ?
 C16 C11 N1 115.31(13) . . ?
 C11 C12 H12 119.8 . . ?
 C13 C12 C11 120.43(17) . . ?
 C13 C12 H12 119.8 . . ?
 C12 C13 H13 119.6 . . ?
 C14 C13 C12 120.74(16) . . ?
 C14 C13 H13 119.6 . . ?
 C13 C14 H14 120.0 . . ?
 C15 C14 C13 119.96(16) . . ?
 C15 C14 H14 120.0 . . ?
 C14 C15 H15 120.1 . . ?
 C14 C15 C16 119.77(17) . . ?
 C16 C15 H15 120.1 . . ?
 C11 C16 N2 115.12(13) . . ?
 C15 C16 N2 123.95(15) . . ?
 C15 C16 C11 120.81(15) . . ?
 N2 C17 H17 117.4 . . ?
 N2 C17 C18 125.21(14) . . ?
 C18 C17 H17 117.4 . . ?
 C19 C18 C17 122.74(14) . . ?
 C23 C18 C17 116.65(15) . . ?
 C23 C18 C19 120.44(15) . . ?
 O2 C19 C18 125.51(14) . . ?
 O2 C19 C20 119.18(14) . . ?
 C20 C19 C18 115.31(14) . . ?
 F2 C20 C19 116.72(15) . . ?
 F2 C20 C21 118.86(15) . . ?
 C21 C20 C19 124.42(16) . . ?
 C20 C21 H21 121.2 . . ?
 C20 C21 C22 117.53(16) . . ?
 C22 C21 H21 121.2 . . ?
 F3 C22 C21 117.78(16) . . ?
 C23 C22 F3 119.57(17) . . ?
 C23 C22 C21 122.65(16) . . ?
 C18 C23 H23 120.2 . . ?
 C22 C23 C18 119.60(16) . . ?
 C22 C23 H23 120.2 . . ?
 C24 O3 H3 109.5 . . ?
 O3 C24 H24A 109.5 . . ?
 O3 C24 H24B 109.5 . . ?
 O3 C24 H24C 109.5 . . ?
 H24A C24 H24B 109.5 . . ?
 H24A C24 H24C 109.5 . . ?
 H24B C24 H24C 109.5 . . ?
 C25 O4 H4A 109.5 . . ?
 O4 C25 H25A 109.5 . . ?
 O4 C25 H25B 109.5 . . ?
 O4 C25 H25C 109.5 . . ?
 H25A C25 H25B 109.5 . . ?
 H25A C25 H25C 109.5 . . ?
 H25B C25 H25C 109.5 . . ?

loop_
  _geom_hbond_atom_site_label_D
  _geom_hbond_atom_site_label_H
  _geom_hbond_atom_site_label_A
  _geom_hbond_distance_DH
  _geom_hbond_distance_HA
  _geom_hbond_distance_DA
  _geom_hbond_angle_DHA
  _geom_hbond_site_symmetry_A
 O3 H3 O2 0.82 2.04 2.8424(18) 168.0 .
 O4 H4A O3 0.82 1.93 2.745(3) 176.1 .

loop_
  _geom_torsion_atom_site_label_1
  _geom_torsion_atom_site_label_2
  _geom_torsion_atom_site_label_3
  _geom_torsion_atom_site_label_4
  _geom_torsion
  _geom_torsion_site_symmetry_1
  _geom_torsion_site_symmetry_2
  _geom_torsion_site_symmetry_3
  _geom_torsion_site_symmetry_4
  _geom_torsion_publ_flag
 Cu1 O1 C7 C6 -167.92(10) . . . . ?
 Cu1 O1 C7 C8 8.6(2) . . . . ?
 Cu1 O2 C19 C18 -3.7(2) . . . . ?
 Cu1 O2 C19 C20 176.37(11) . . . . ?
 Cu1 N1 C9 C8 -16.9(2) . . . . ?
 Cu1 N1 C9 C10 160.74(13) . . . . ?
 Cu1 N1 C11 C12 162.05(14) . . . . ?
 Cu1 N1 C11 C16 -12.41(16) . . . . ?
 Cu1 N2 C16 C11 5.06(17) . . . . ?
 Cu1 N2 C16 C15 -171.01(13) . . . . ?
 Cu1 N2 C17 C18 6.2(2) . . . . ?
 F1 C3 C4 C5 -179.87(16) . . . . ?
 F2 C20 C21 C22 -179.31(16) . . . . ?
 F3 C22 C23 C18 177.42(16) . . . . ?
 O1 Cu1 O2 C19 -173.29(13) . . . . ?
 O1 Cu1 N1 C9 23.55(13) . . . . ?
 O1 Cu1 N1 C11 -166.68(10) . . . . ?
 O1 Cu1 N2 C16 62.0(19) . . . . ?
 O1 Cu1 N2 C17 -116.8(19) . . . . ?
 O1 C7 C8 C9 6.2(3) . . . . ?
 O2 Cu1 O1 C7 161.61(14) . . . . ?
 O2 Cu1 N1 C9 166.9(15) . . . . ?
 O2 Cu1 N1 C11 -23.3(16) . . . . ?
 O2 Cu1 N2 C16 169.46(10) . . . . ?
 O2 Cu1 N2 C17 -9.31(14) . . . . ?
 O2 C19 C20 F2 -2.3(2) . . . . ?
 O2 C19 C20 C21 177.44(16) . . . . ?
 N1 Cu1 O1 C7 -19.51(14) . . . . ?
 N1 Cu1 O2 C19 43.3(16) . . . . ?
 N1 Cu1 N2 C16 -9.45(10) . . . . ?
 N1 Cu1 N2 C17 171.78(14) . . . . ?
 N1 C11 C12 C13 179.93(16) . . . . ?
 N1 C11 C16 N2 4.9(2) . . . . ?
 N1 C11 C16 C15 -178.87(14) . . . . ?
 N2 Cu1 O1 C7 -90.8(19) . . . . ?
 N2 Cu1 O2 C19 8.07(13) . . . . ?
 N2 Cu1 N1 C9 -157.80(13) . . . . ?
 N2 Cu1 N1 C11 11.98(10) . . . . ?
 N2 C17 C18 C19 1.4(3) . . . . ?
 N2 C17 C18 C23 176.73(16) . . . . ?
 C1 C2 C3 F1 179.39(17) . . . . ?
 C1 C2 C3 C4 -1.4(3) . . . . ?
 C1 C6 C7 O1 -162.06(15) . . . . ?
 C1 C6 C7 C8 21.3(2) . . . . ?
 C2 C1 C6 C5 2.1(3) . . . . ?
 C2 C1 C6 C7 -176.55(16) . . . . ?
 C2 C3 C4 C5 0.9(3) . . . . ?
 C3 C4 C5 C6 1.1(3) . . . . ?
 C4 C5 C6 C1 -2.6(3) . . . . ?
 C4 C5 C6 C7 176.11(16) . . . . ?
 C5 C6 C7 O1 19.3(2) . . . . ?
 C5 C6 C7 C8 -157.35(16) . . . . ?
 C6 C1 C2 C3 -0.1(3) . . . . ?
 C6 C7 C8 C9 -177.45(15) . . . . ?
 C7 C8 C9 N1 -1.2(3) . . . . ?
 C7 C8 C9 C10 -179.08(17) . . . . ?
 C9 N1 C11 C12 -28.5(2) . . . . ?
 C9 N1 C11 C16 157.02(15) . . . . ?
 C11 N1 C9 C8 174.81(15) . . . . ?
 C11 N1 C9 C10 -7.6(3) . . . . ?
 C11 C12 C13 C14 1.1(3) . . . . ?
 C12 C11 C16 N2 -170.03(14) . . . . ?
 C12 C11 C16 C15 6.2(2) . . . . ?
 C12 C13 C14 C15 3.3(3) . . . . ?
 C13 C14 C15 C16 -2.9(3) . . . . ?
 C14 C15 C16 N2 173.94(17) . . . . ?
 C14 C15 C16 C11 -1.9(3) . . . . ?
 C16 N2 C17 C18 -172.43(14) . . . . ?
 C16 C11 C12 C13 -5.7(2) . . . . ?
 C17 N2 C16 C11 -176.12(14) . . . . ?
 C17 N2 C16 C15 7.8(2) . . . . ?
 C17 C18 C19 O2 -2.8(2) . . . . ?
 C17 C18 C19 C20 177.15(14) . . . . ?
 C17 C18 C23 C22 -175.57(16) . . . . ?
 C18 C19 C20 F2 177.82(14) . . . . ?
 C18 C19 C20 C21 -2.5(2) . . . . ?
 C19 C18 C23 C22 -0.1(3) . . . . ?
 C19 C20 C21 C22 1.0(3) . . . . ?
 C20 C21 C22 F3 -177.85(16) . . . . ?
 C20 C21 C22 C23 1.1(3) . . . . ?
 C21 C22 C23 C18 -1.6(3) . . . . ?
 C23 C18 C19 O2 -177.94(15) . . . . ?
 C23 C18 C19 C20 2.0(2) . . . . ?

_iucr_refine_instructions_details
;
TITL test in P-1 #2
REM reset to P-1 #2
CELL 0.71073 8.0752 11.5973 12.5377 91.092 91.563 98.749
ZERR 2 0.0003 0.0004 0.0004 0.002 0.002 0.002
LATT 1
SFAC C H Cu F N O
UNIT 50 46 2 6 4 8
 
L.S. 20 0 0
PLAN  5
TEMP 23
HTAB O3 O2
HTAB O4 O3
BOND
MORE -1
BOND $H
CONF
fmap 2
acta 52
REM <olex2.extras>
REM <HklSrc "%.\\VA_JC_ad13_15_abs.hkl">
REM </olex2.extras>
 
WGHT    0.045500    0.355100
FVAR       0.37533
CU1   3    0.595114    0.530171    0.686139    11.00000    0.04685    0.02796 =
         0.02953    0.00386    0.00539    0.01103
F1    4    0.855728    0.032457    0.292415    11.00000    0.10374    0.04786 =
         0.06427   -0.01396    0.01300    0.02515
F2    4    0.411493    0.202896    0.871011    11.00000    0.08648    0.03472 =
         0.07298    0.01163    0.02808    0.01644
F3    4    0.106980    0.389162    1.116999    11.00000    0.07994    0.07563 =
         0.05856    0.01388    0.03731    0.01017
O1    6    0.693040    0.421778    0.602948    11.00000    0.06772    0.03729 =
         0.03419    0.00743    0.01283    0.02221
O2    6    0.515306    0.402284    0.774777    11.00000    0.05603    0.03145 =
         0.03560    0.00570    0.01124    0.01306
N1    5    0.677431    0.663509    0.600199    11.00000    0.04084    0.02795 =
         0.03417    0.00225    0.00216    0.00699
N2    5    0.500589    0.642513    0.772421    11.00000    0.04268    0.02889 =
         0.03031    0.00176   -0.00073    0.00932
C1    1    0.875160    0.338190    0.357609    11.00000    0.04606    0.03956 =
         0.04193    0.00381    0.00933    0.00908
AFIX  43
H1    2    0.921328    0.410248    0.331716    11.00000   -1.20000
AFIX   0
C2    1    0.901110    0.236785    0.304592    11.00000    0.05779    0.05211 =
         0.04198    0.00014    0.01348    0.01632
AFIX  43
H2    2    0.963967    0.240083    0.243362    11.00000   -1.20000
AFIX   0
C3    1    0.832483    0.132017    0.344132    11.00000    0.06095    0.04044 =
         0.04351   -0.00714   -0.00133    0.01912
C4    1    0.741762    0.122726    0.435512    11.00000    0.06411    0.03642 =
         0.04729    0.00609    0.00477    0.01193
AFIX  43
H4    2    0.697772    0.050095    0.461191    11.00000   -1.20000
AFIX   0
C5    1    0.717710    0.224327    0.488199    11.00000    0.05430    0.04032 =
         0.03689    0.00674    0.00940    0.01379
AFIX  43
H5    2    0.658300    0.219661    0.550876    11.00000   -1.20000
AFIX   0
C6    1    0.780449    0.333436    0.449506    11.00000    0.03775    0.03680 =
         0.03301    0.00239    0.00002    0.01149
C7    1    0.740236    0.439124    0.506661    11.00000    0.03883    0.03675 =
         0.03218    0.00237    0.00277    0.01020
C8    1    0.746261    0.544134    0.454872    11.00000    0.04745    0.03655 =
         0.03220    0.00323    0.00690    0.00820
AFIX  43
H8    2    0.771843    0.543423    0.383011    11.00000   -1.20000
AFIX   0
C9    1    0.717813    0.652399    0.499160    11.00000    0.04073    0.03278 =
         0.03491    0.00613    0.00382    0.00468
C10   1    0.730864    0.751105    0.421489    11.00000    0.07610    0.03569 =
         0.03900    0.00773    0.00970    0.00628
AFIX 137
H10A  2    0.655799    0.804071    0.441217    11.00000   -1.50000
H10B  2    0.701374    0.720154    0.350791    11.00000   -1.50000
H10C  2    0.843714    0.791827    0.423092    11.00000   -1.50000
AFIX   0
C11   1    0.659665    0.769762    0.652941    11.00000    0.04339    0.02942 =
         0.03555    0.00174   -0.00416    0.00792
C12   1    0.742308    0.880629    0.629657    11.00000    0.05492    0.03384 =
         0.04527    0.00383    0.00169    0.00304
AFIX  43
H12   2    0.817773    0.889423    0.574605    11.00000   -1.20000
AFIX   0
C13   1    0.712689    0.977605    0.687975    11.00000    0.07250    0.02795 =
         0.05425    0.00258   -0.00285    0.00077
AFIX  43
H13   2    0.767085    1.051181    0.670906    11.00000   -1.20000
AFIX   0
C14   1    0.603386    0.966318    0.771124    11.00000    0.08153    0.03149 =
         0.05021   -0.00629   -0.00322    0.01374
AFIX  43
H14   2    0.579948    1.032380    0.807375    11.00000   -1.20000
AFIX   0
C15   1    0.528946    0.857080    0.800435    11.00000    0.06496    0.03641 =
         0.04083   -0.00190    0.00321    0.01392
AFIX  43
H15   2    0.459184    0.849029    0.858494    11.00000   -1.20000
AFIX   0
C16   1    0.558547    0.758843    0.742831    11.00000    0.04594    0.02962 =
         0.03425    0.00062   -0.00470    0.00924
C17   1    0.399113    0.618727    0.849693    11.00000    0.04525    0.03535 =
         0.03321   -0.00104    0.00117    0.01302
AFIX  43
H17   2    0.354046    0.680275    0.880248    11.00000   -1.20000
AFIX   0
C18   1    0.350575    0.505192    0.891984    11.00000    0.03998    0.03855 =
         0.03104    0.00136    0.00056    0.00823
C19   1    0.413404    0.404876    0.853754    11.00000    0.04079    0.03558 =
         0.02846    0.00298   -0.00074    0.00720
C20   1    0.358384    0.300751    0.907862    11.00000    0.04642    0.03621 =
         0.04156    0.00471    0.00190    0.00668
C21   1    0.257363    0.293644    0.993709    11.00000    0.04761    0.04634 =
         0.04382    0.01248    0.00336    0.00143
AFIX  43
H21   2    0.225880    0.223227    1.027318    11.00000   -1.20000
AFIX   0
C22   1    0.203565    0.394956    1.028865    11.00000    0.04470    0.05805 =
         0.03860    0.00582    0.01068    0.00412
C23   1    0.244773    0.498105    0.980702    11.00000    0.04461    0.04807 =
         0.03975    0.00049    0.00752    0.01113
AFIX  43
H23   2    0.203961    0.564086    1.005610    11.00000   -1.20000
AFIX   0
 
O3    6    0.770268    0.260323    0.801879    11.00000    0.06513    0.06368 =
         0.08892    0.02908    0.01762    0.02575
AFIX 147
H3    2    0.702179    0.303046    0.785138    11.00000   -1.50000
AFIX   0
C24   1    0.928531    0.308081    0.767768    11.00000    0.05605    0.09368 =
         0.06337    0.01327    0.00077    0.00890
AFIX 137
H24A  2    0.926065    0.312107    0.691346    11.00000   -1.50000
H24B  2    1.009133    0.259865    0.790120    11.00000   -1.50000
H24C  2    0.959294    0.385132    0.798368    11.00000   -1.50000
AFIX   0
 
O4    6    0.767584    0.185243    1.008197    11.00000    0.16087    0.08442 =
         0.06714    0.00317    0.03623    0.05347
AFIX 147
H4A   2    0.773258    0.207683    0.946591    11.00000   -1.50000
AFIX   0
C25   1    0.826871    0.082460    1.014709    11.00000    0.13521    0.09670 =
         0.06871   -0.00684   -0.01006    0.05545
AFIX 137
H25A  2    0.888481    0.070373    0.952104    11.00000   -1.50000
H25B  2    0.734772    0.020053    1.019801    11.00000   -1.50000
H25C  2    0.899411    0.084050    1.076843    11.00000   -1.50000
HKLF 4
 
REM  test in P-1 #2
REM R1 =  0.0261 for   4386 Fo > 4sig(Fo)  and  0.0295 for all   4766 data
REM    321 parameters refined using      0 restraints
 
END  
     
WGHT      0.0455      0.3551 
REM Highest difference peak  0.318,  deepest hole -0.220,  1-sigma level  0.048
Q1    1   0.8134  0.3150  0.8386  11.00000  0.05    0.32
Q2    1   0.3076  0.5010  0.9309  11.00000  0.05    0.28
Q3    1   0.4552  0.4021  0.7989  11.00000  0.05    0.27
Q4    1   0.6250  0.7585  0.7007  11.00000  0.05    0.27
Q5    1   0.5026  0.6338  0.8051  11.00000  0.05    0.26

REM The information below was added by Olex2.
REM
REM R1 = 0.0261 for 4386 Fo > 4sig(Fo) and 0.0295 for all 99600 data
REM n/a parameters refined using n/a restraints
REM Highest difference peak 0.32, deepest hole -0.22
REM Mean Shift 0, Max Shift 0.001.

REM +++ Tabular Listing of Refinement Information +++
REM R1_all = 0.0295
REM R1_gt = 0.0261
REM wR_ref = 0.0769
REM GOOF = 1.060
REM Shift_max = 0.001
REM Shift_mean = 0
REM Reflections_all = 99600
REM Reflections_gt = 4386
REM Parameters = n/a
REM Hole = -0.22
REM Peak = 0.32
REM Flack = n/a

;
_olex2_submission_special_instructions 'No special instructions were received'
loop_
  _refln_index_h
  _refln_index_k
  _refln_index_l
  _refln_F_squared_meas
  _refln_F_squared_sigma
  _refln_scale_group_code
 -1 0 0 1480.95 31.7988 11
 -1 0 0 1448.59 29.5102 13
 -1 0 0 1436.31 30.3493 9
 -1 0 0 1430.14 32.1899 5
 1 0 0 1600.86 30.1354 32
 1 0 0 1408.64 29.4972 13
 1 0 0 1441.24 30.3781 9
 1 0 0 1440.59 31.8013 11
 1 0 0 1397.42 32.2206 5
 1 0 0 1455.69 31.8421 7
 1 0 0 1386.74 31.8045 7
 -2 0 0 1014.47 22.7692 7
 -2 0 0 1070.6 22.7233 7
 -2 0 0 1052.04 21.9665 9
 -2 0 0 1031.58 22.9289 11
 -2 0 0 1011.89 22.8933 3
 -2 0 0 1042.08 21.2668 13
 -2 0 0 1092.22 22.2003 31
 2 0 0 1026.51 20.6932 21
 2 0 0 1015.89 22.9777 11
 2 0 0 1023.89 22.9605 7
 2 0 0 1060.63 23.1 7
 2 0 0 1022.48 21.8131 9
 2 0 0 1124.36 21.6759 32
 2 0 0 1047.15 21.2556 13
 2 0 0 1043.94 22.0615 18
 2 0 0 1003.75 23.2638 5
 -3 0 0 0.28106 0.26626 11
 -3 0 0 0.08551 0.26121 13
 -3 0 0 0.03136 0.28611 24
 -3 0 0 0.10908 0.20221 9
 -3 0 0 0.0642 0.34748 31
 -3 0 0 0.28108 0.26613 7
 -3 0 0 0.69914 0.27858 7
 -3 0 0 0.01587 0.22794 5
 -3 0 0 -0.0728 0.21034 3
 3 0 0 0.2658 0.28725 13
 3 0 0 -0.2047 0.20486 5
 3 0 0 0.16555 0.39439 32
 3 0 0 0.07189 0.15525 21
 3 0 0 0.17261 0.21182 18
 3 0 0 0.00305 0.24372 11
 3 0 0 0.29545 0.29972 7
 3 0 0 0.43638 0.23504 9
 3 0 0 -0.0017 0.26066 7
 -4 0 0 2.02292 0.38458 11
 -4 0 0 2.80815 0.41761 7
 -4 0 0 1.90785 0.30365 9
 -4 0 0 2.32005 0.41193 24
 -4 0 0 2.20256 0.47152 31
 -4 0 0 2.10859 0.37991 13
 -4 0 0 2.19374 0.37817 7
 -4 0 0 1.67243 0.32889 5
 -4 0 0 2.61431 0.34812 3
 4 0 0 2.46 0.39264 7
 4 0 0 2.74352 0.31943 18
 4 0 0 1.84098 0.33454 9
 4 0 0 1.89636 0.5354 32
 4 0 0 2.13469 0.41788 13
 4 0 0 2.01693 0.37009 11
 4 0 0 1.86606 0.37427 7
 4 0 0 1.66628 0.28984 5
 4 0 0 2.26968 0.23598 1
 -5 0 0 15.3231 0.97593 24
 -5 0 0 15.2801 0.92081 11
 -5 0 0 16.0211 0.78984 3
 -5 0 0 15.0782 0.85596 5
 -5 0 0 15.1236 0.88637 7
 -5 0 0 15.4499 0.77237 9
 -5 0 0 15.44 0.874 13
 -5 0 0 15.6026 0.88719 7
 -5 0 0 16.2936 1.16214 31
 5 0 0 15.2818 0.9293 13
 5 0 0 15.7035 0.81735 8
 5 0 0 15.9193 0.89792 7
 5 0 0 13.8881 0.853 11
 5 0 0 15.2197 0.95042 7
 5 0 0 16.1234 0.72066 18
 5 0 0 15.2018 1.19443 32
 5 0 0 15.2528 0.81623 9
 5 0 0 14.6488 0.48821 1
 5 0 0 14.5811 0.75492 5
 -6 0 0 160.817 4.03982 7
 -6 0 0 155.441 3.87545 24
 -6 0 0 156.632 3.98317 11
 -6 0 0 158.752 3.91118 3
 -6 0 0 159.51 3.99289 7
 -6 0 0 157.945 3.73043 13
 -6 0 0 150.967 4.21608 31
 6 0 0 156.843 3.72566 9
 6 0 0 160.731 3.61203 8
 6 0 0 159.898 3.51139 1
 6 0 0 158.331 3.77925 13
 6 0 0 154.914 4.21107 32
 6 0 0 161.095 3.9966 7
 6 0 0 160.209 4.04256 7
 6 0 0 155.867 3.61301 18
 6 0 0 153.448 3.94059 11
 -7 0 0 7.22615 0.82746 11
 -7 0 0 8.23364 0.93517 24
 -7 0 0 8.25132 0.7664 15
 -7 0 0 7.78544 0.70153 19
 -7 0 0 6.45643 0.73219 7
 -7 0 0 7.56917 0.83984 3
 -7 0 0 9.35531 1.12271 7
 -7 0 0 8.03213 1.17435 31
 -7 0 0 6.51069 0.73731 13
 7 0 0 8.58114 0.93681 7
 7 0 0 8.17544 0.78665 5
 7 0 0 8.79557 0.84499 11
 7 0 0 7.66538 0.82582 13
 7 0 0 9.10127 1.04728 7
 7 0 0 8.29724 0.86504 8
 7 0 0 7.54628 1.19475 32
 7 0 0 8.17431 0.75866 9
 -8 0 0 7.7578 1.18348 31
 -8 0 0 9.98293 1.0465 7
 -8 0 0 10.7497 1.04051 13
 -8 0 0 10.749 1.16573 24
 -8 0 0 11.9803 1.35475 7
 -8 0 0 10.1254 0.9282 15
 -8 0 0 9.91273 0.94621 3
 -8 0 0 9.09213 0.9972 11
 -8 0 0 10.0645 1.10733 19
 8 0 0 10.0919 1.05049 11
 8 0 0 8.07653 1.33844 32
 8 0 0 12.5222 1.30059 7
 8 0 0 10.1535 1.03042 5
 8 0 0 13.5738 1.59182 7
 8 0 0 11.3357 1.28531 9
 8 0 0 9.64918 0.85869 8
 8 0 0 9.00653 1.06321 2
 -9 0 0 4.35106 1.22797 29
 -9 0 0 2.74231 1.3158 31
 -9 0 0 3.19245 0.85343 7
 -9 0 0 4.21906 0.98394 15
 -9 0 0 4.96396 0.7925 19
 -9 0 0 2.93994 1.27176 24
 -9 0 0 6.52725 1.13086 11
 -9 0 0 3.64255 0.65725 3
 -9 0 0 2.72128 1.00882 7
 -9 0 0 6.27612 1.07922 13
 9 0 0 4.47857 0.81816 2
 9 0 0 3.34258 0.73041 5
 9 0 0 4.38277 0.99465 7
 9 0 0 5.65683 1.23738 7
 9 0 0 3.26434 1.09703 11
 9 0 0 3.74913 0.68177 8
 9 0 0 2.84386 0.92902 9
 9 0 0 4.25439 1.494 32
 10 -1 0 1.51588 1.15115 9
 10 -1 0 3.38069 1.00388 5
 10 -1 0 1.46702 1.49562 32
 10 -1 0 2.11258 1.39737 7
 10 -1 0 7.32047 1.24866 7
 10 -1 0 3.99869 1.04624 2
 -10 1 0 3.44088 1.59878 24
 -10 1 0 6.55616 1.40946 11
 -10 1 0 4.14992 1.42749 29
 -10 1 0 3.82491 1.29674 7
 -10 1 0 3.63472 1.30966 15
 -10 1 0 4.86928 1.27146 7
 -10 1 0 3.48377 1.48874 31
 -10 1 0 3.35103 1.3093 13
 9 -1 0 -0.0318 0.6363 8
 9 -1 0 1.41509 0.69973 5
 9 -1 0 0.37001 1.07193 7
 9 -1 0 2.4057 0.97697 11
 9 -1 0 1.06941 0.8316 9
 9 -1 0 0.14908 1.24303 32
 9 -1 0 2.53491 0.84524 7
 -9 1 0 1.42446 1.00458 15
 -9 1 0 0.69904 0.54606 3
 -9 1 0 1.15985 1.14046 31
 -9 1 0 0.33085 0.75804 10
 -9 1 0 0.84729 0.62367 19
 -9 1 0 0.09356 0.85525 13
 -9 1 0 2.00595 0.9109 7
 -9 1 0 1.25916 1.14649 29
 -9 1 0 0.40564 0.96433 11
 -9 1 0 -0.001 1.16781 24
 -9 1 0 0.78861 0.87987 7
 8 -1 0 0.09432 0.58623 18
 8 -1 0 1.25388 0.7369 11
 8 -1 0 -0.5329 1.02665 32
 8 -1 0 0.18457 0.5006 5
 8 -1 0 -0.2362 0.46217 8
 8 -1 0 1.01719 0.68843 7
 8 -1 0 0.5952 0.76293 13
 8 -1 0 0.96831 0.82559 7
 8 -1 0 0.12874 0.63753 9
 -8 1 0 -0.4361 0.96318 31
 -8 1 0 0.42052 0.48081 3
 -8 1 0 0.32194 0.86205 29
 -8 1 0 0.73642 0.85866 24
 -8 1 0 0.95827 0.69861 7
 -8 1 0 0.16176 0.6755 13
 -8 1 0 0.15087 0.74886 11
 -8 1 0 0.41903 0.53221 19
 -8 1 0 0.49493 0.60838 7
 7 -1 0 -0.2074 0.59066 7
 7 -1 0 -0.6645 0.58661 13
 7 -1 0 0.33105 0.5588 7
 7 -1 0 0.28296 0.41462 5
 7 -1 0 0.29593 0.56088 11
 7 -1 0 0.48751 0.4572 8
 7 -1 0 -0.4084 0.51432 9
 7 -1 0 0.49127 0.9147 32
 7 -1 0 0.23977 0.51062 18
 -7 1 0 0.60493 0.48979 7
 -7 1 0 0.61509 0.46425 19
 -7 1 0 -0.197 0.77257 31
 -7 1 0 0.55161 0.60816 11
 -7 1 0 -0.9471 0.6804 24
 -7 1 0 0.31801 0.56979 13
 -7 1 0 0.12242 0.59186 7
 -7 1 0 0.23388 0.38413 3
 6 -1 0 57.9951 1.87064 7
 6 -1 0 56.5285 1.72768 5
 6 -1 0 55.8333 1.66706 9
 6 -1 0 56.5419 1.88959 7
 6 -1 0 57.5535 1.78061 13
 6 -1 0 57.7099 1.66955 8
 6 -1 0 55.8123 1.79301 11
 6 -1 0 57.4829 2.19094 32
 6 -1 0 56.9622 1.62463 18
 -6 1 0 57.6905 1.7839 5
 -6 1 0 57.5153 1.7223 3
 -6 1 0 55.7895 1.55791 19
 -6 1 0 56.7824 1.86338 24
 -6 1 0 52.7073 2.10585 31
 -6 1 0 56.9305 1.84319 11
 -6 1 0 55.161 1.71896 13
 -6 1 0 55.9913 1.84542 7
 -6 1 0 55.6982 1.87134 7
 5 -1 0 43.3546 1.26507 18
 5 -1 0 42.4299 1.67463 32
 5 -1 0 38.8754 1.35649 11
 5 -1 0 39.7233 1.26213 9
 5 -1 0 43.3011 1.32474 5
 5 -1 0 43.9112 1.45309 7
 5 -1 0 41.5562 1.37254 13
 5 -1 0 41.8017 1.28674 8
 5 -1 0 41.5758 1.39936 7
 -5 1 0 42.7174 1.40569 11
 -5 1 0 41.7273 1.63894 31
 -5 1 0 39.5033 1.34052 5
 -5 1 0 43.0354 1.32752 3
 -5 1 0 42.686 1.31905 13
 -5 1 0 40.7153 1.1943 19
 -5 1 0 40.8459 1.3808 7
 -5 1 0 42.4567 1.44929 7
 4 -1 0 10.4889 0.61202 9
 4 -1 0 11.7567 0.67605 11
 4 -1 0 10.5842 0.64694 8
 4 -1 0 11.5264 0.71817 7
 4 -1 0 11.1929 0.69542 7
 4 -1 0 11.1186 0.72115 13
 4 -1 0 10.7283 0.90899 32
 4 -1 0 10.8143 0.58362 5
 -4 1 0 10.6344 0.54468 19
 -4 1 0 10.7722 0.69136 11
 -4 1 0 10.6148 0.72409 7
 -4 1 0 10.3336 0.5968 3
 -4 1 0 10.2517 0.62252 5
 -4 1 0 10.7742 0.65715 13
 -4 1 0 10.6804 0.4793 21
 3 -1 0 -0.2107 0.26894 7
 3 -1 0 0.18717 0.26035 7
 3 -1 0 0.20831 0.21918 8
 3 -1 0 -0.0408 0.17239 5
 3 -1 0 0.12207 0.23657 11
 3 -1 0 0.19703 0.36545 32
 3 -1 0 0.03569 0.20524 9
 3 -1 0 0.17998 0.2506 13
 -3 1 0 -0.1539 0.19984 5
 -3 1 0 0.00928 0.27416 7
 -3 1 0 0.06682 0.19112 19
 -3 1 0 0.23398 0.27339 7
 -3 1 0 -0.0038 0.23283 11
 -3 1 0 0.33553 0.22516 13
 -3 1 0 0.22577 0.18204 21
 -3 1 0 -0.0408 0.19772 3
 2 -1 0 1461.12 27.7623 32
 2 -1 0 1343.75 27.3843 13
 2 -1 0 1361.01 29.535 7
 2 -1 0 1364.56 29.4543 11
 2 -1 0 1322.03 26.294 8
 2 -1 0 1318.37 29.5483 3
 2 -1 0 1324.9 29.4941 7
 2 -1 0 1321.73 29.8928 5
 -2 1 0 1320.65 29.4288 7
 -2 1 0 1349.01 27.2761 13
 -2 1 0 1327.16 29.5244 3
 -2 1 0 1302.09 29.485 11
 -2 1 0 1322.15 29.0103 19
 -2 1 0 1306.54 29.7829 5
 1 -1 0 763.837 14.2207 31
 1 -1 0 643.735 13.2553 8
 1 -1 0 654.329 14.8464 5
 1 -1 0 650.606 13.5829 13
 1 -1 0 747.777 13.8629 32
 1 -1 0 660.16 14.6142 7
 1 -1 0 657.197 14.7107 3
 1 -1 0 649.577 14.6226 7
 -1 1 0 746.707 13.3175 29
 -1 1 0 649.363 14.7043 7
 -1 1 0 644.358 14.293 10
 -1 1 0 659.819 13.5946 13
 -1 1 0 652.44 14.7857 7
 -1 1 0 651.857 14.7781 3
 -1 1 0 649.893 13.2307 8
 -1 1 0 644.207 14.8988 5
 -1 1 0 623.207 12.8646 16
 -1 -1 0 600.189 13.4112 11
 -1 -1 0 614.803 13.5043 7
 -1 -1 0 608.701 12.4437 13
 -1 -1 0 668.837 13.1079 31
 -1 -1 0 596.014 13.5163 7
 -1 -1 0 624.051 12.9116 24
 -1 -1 0 586.919 12.951 9
 -1 -1 0 597.326 14.8168 2
 1 1 0 597.898 13.0134 24
 1 1 0 603.277 13.2876 15
 1 1 0 618.071 13.3853 7
 1 1 0 676.836 12.7939 32
 1 1 0 656.707 12.9347 30
 1 1 0 601.027 13.594 7
 1 1 0 592.091 12.954 9
 1 1 0 596.561 14.7488 2
 1 1 0 602.031 13.4839 11
 -2 -1 0 551.638 11.8657 9
 -2 -1 0 569.99 12.2149 15
 -2 -1 0 559.855 11.904 18
 -2 -1 0 553.751 12.4139 7
 -2 -1 0 564.94 11.5461 13
 -2 -1 0 564.769 12.4029 7
 -2 -1 0 562.294 11.9297 24
 -2 -1 0 562.481 12.4323 11
 -2 -1 0 586.088 12.1955 31
 2 1 0 573.906 12.5644 5
 2 1 0 557.582 11.5459 13
 2 1 0 562.283 11.8732 9
 2 1 0 557.962 13.5198 2
 2 1 0 569.255 12.409 7
 2 1 0 562.245 11.9293 24
 2 1 0 596.926 11.9167 32
 2 1 0 559.352 12.4153 7
 2 1 0 558.495 12.4263 11
 -3 -1 0 284.916 6.23572 24
 -3 -1 0 286.421 6.05511 13
 -3 -1 0 289.353 6.50429 11
 -3 -1 0 284.095 6.17333 9
 -3 -1 0 291.652 6.29876 15
 -3 -1 0 287.826 6.47657 7
 -3 -1 0 290.143 6.47777 31
 3 1 0 285.752 6.06411 13
 3 1 0 281.183 6.5414 5
 3 1 0 288.571 6.4969 11
 3 1 0 296.359 6.3559 32
 3 1 0 287.899 6.49805 7
 3 1 0 288.588 6.18124 9
 3 1 0 277.019 6.46541 7
 -4 -1 0 30.8037 1.00477 9
 -4 -1 0 29.7943 1.12199 24
 -4 -1 0 31.5944 1.29733 31
 -4 -1 0 30.952 1.07854 13
 -4 -1 0 29.9468 1.0246 3
 -4 -1 0 31.2492 1.10357 7
 -4 -1 0 32.6723 1.14964 11
 -4 -1 0 31.4322 1.13518 7
 -4 -1 0 31.1146 0.95523 15
 4 1 0 29.69 1.09164 7
 4 1 0 31.8344 1.14028 13
 4 1 0 31.2312 1.03943 5
 4 1 0 31.1174 1.09801 11
 4 1 0 31.7095 0.81188 21
 4 1 0 32.2894 1.03476 9
 4 1 0 30.4008 1.30467 32
 4 1 0 31.5853 1.14351 7
 -5 -1 0 29.1231 1.08605 3
 -5 -1 0 28.0507 1.13939 13
 -5 -1 0 28.3355 1.21211 11
 -5 -1 0 26.9767 0.9868 15
 -5 -1 0 27.5154 1.40271 31
 -5 -1 0 29.0849 1.22465 24
 -5 -1 0 28.6828 1.03545 9
 -5 -1 0 28.6982 1.16699 7
 -5 -1 0 28.7374 1.21213 7
 5 1 0 27.8783 0.78439 21
 5 1 0 29.3306 1.15665 11
 5 1 0 28.3114 1.07732 5
 5 1 0 28.4528 1.08541 9
 5 1 0 28.6894 1.03273 2
 5 1 0 29.4714 1.22148 13
 5 1 0 27.6352 1.15989 7
 5 1 0 28.0428 1.42553 32
 5 1 0 29.7702 1.22981 7
 -6 -1 0 78.5433 2.35328 11
 -6 -1 0 75.8433 2.34034 7
 -6 -1 0 78.224 2.23112 3
 -6 -1 0 79.063 2.2291 13
 -6 -1 0 74.9609 2.63262 31
 -6 -1 0 76.9935 2.33714 24
 -6 -1 0 80.2647 2.13952 9
 -6 -1 0 77.454 2.09347 15
 -6 -1 0 77.3553 2.29281 7
 6 1 0 79.71 2.31966 7
 6 1 0 78.1431 1.88064 1
 6 1 0 80.8442 2.40196 7
 6 1 0 74.198 2.61808 32
 6 1 0 79.7821 2.3198 11
 6 1 0 79.9701 2.24484 5
 6 1 0 79.2669 2.29172 13
 6 1 0 77.4575 2.16812 9
 6 1 0 79.0565 2.2587 2
 -7 -1 0 0.56093 0.57736 7
 -7 -1 0 -0.5539 0.54612 13
 -7 -1 0 -0.9145 0.55277 7
 -7 -1 0 -0.6758 0.5313 15
 -7 -1 0 -0.5129 0.85996 31
 -7 -1 0 -0.3781 0.51924 9
 -7 -1 0 0.41606 0.63505 11
 -7 -1 0 0.11524 0.41905 3
 -7 -1 0 0.00775 0.74881 24
 7 1 0 -0.4048 0.27998 1
 7 1 0 0.18065 0.44649 2
 7 1 0 -0.5354 0.65309 7
 7 1 0 0.17774 0.8867 32
 7 1 0 -0.3738 0.40023 8
 7 1 0 -0.2656 0.53431 7
 7 1 0 0.45709 0.57326 9
 7 1 0 -0.5377 0.30738 5
 7 1 0 -0.501 0.57668 11
 -8 -1 0 5.3941 0.66399 3
 -8 -1 0 6.1326 0.96566 7
 -8 -1 0 4.85656 0.9703 11
 -8 -1 0 7.98713 0.80141 15
 -8 -1 0 5.76207 0.90952 13
 -8 -1 0 6.19663 0.9253 7
 -8 -1 0 6.83058 1.28974 31
 -8 -1 0 7.32782 1.11815 24
 8 1 0 7.2142 1.10639 7
 8 1 0 4.85136 0.78689 7
 8 1 0 5.65923 1.35785 32
 8 1 0 6.44647 0.72007 2
 8 1 0 4.94046 0.90767 11
 8 1 0 6.15566 0.71138 5
 8 1 0 6.23776 0.86672 9
 8 1 0 6.311 0.74919 8
 8 1 0 6.51155 0.62891 1
 -9 -1 0 1.14146 1.00447 13
 -9 -1 0 0.26408 1.18599 24
 -9 -1 0 1.90696 0.89415 19
 -9 -1 0 2.18809 1.21512 31
 -9 -1 0 1.25513 0.58148 3
 -9 -1 0 2.93451 0.9311 7
 -9 -1 0 3.1309 1.05416 7
 -9 -1 0 3.74673 1.15221 11
 -9 -1 0 2.10643 0.83667 15
 9 1 0 0.77492 0.71274 8
 9 1 0 1.10913 0.63161 5
 9 1 0 1.27293 0.92084 7
 9 1 0 0.91202 1.04498 11
 9 1 0 1.60469 1.34184 32
 9 1 0 0.69612 0.92118 9
 9 1 0 2.3151 1.25627 7
 9 1 0 1.11165 0.76286 2
 10 -2 0 3.95145 0.85734 16
 10 -2 0 0.09755 0.98076 5
 10 -2 0 2.31261 1.26204 12
 10 -2 0 2.77284 1.11802 9
 10 -2 0 5.68109 1.17241 7
 10 -2 0 4.70028 1.57364 7
 10 -2 0 3.30619 1.55908 32
 -10 2 0 3.65517 1.21281 7
 -10 2 0 3.01569 1.24013 7
 -10 2 0 4.78601 1.42412 15
 -10 2 0 0.30373 1.30131 11
 -10 2 0 2.4626 1.57608 24
 -10 2 0 1.95354 1.42017 31
 -10 2 0 2.56866 1.25406 13
 9 -2 0 2.1462 0.81287 9
 9 -2 0 0.53475 0.70801 5
 9 -2 0 1.68944 0.95859 13
 9 -2 0 1.92311 0.89333 7
 9 -2 0 2.11076 0.86705 18
 9 -2 0 0.78556 1.03773 7
 9 -2 0 1.62285 0.61145 8
 9 -2 0 0.9003 1.10026 32
 -9 2 0 1.0541 0.57065 3
 -9 2 0 2.39983 0.8017 10
 -9 2 0 2.34476 1.02341 11
 -9 2 0 0.74766 1.14733 31
 -9 2 0 2.16523 0.95847 7
 -9 2 0 2.56889 1.21157 24
 -9 2 0 -0.0032 0.83112 7
 -9 2 0 3.10306 0.92677 13
 -9 2 0 2.19083 1.07866 29
 8 -2 0 2.14375 0.5734 5
 8 -2 0 1.34786 0.79255 13
 8 -2 0 1.0417 0.67592 7
 8 -2 0 2.39055 1.1529 32
 8 -2 0 0.9877 0.52011 8
 8 -2 0 1.23063 0.71562 18
 8 -2 0 3.03877 0.85712 7
 8 -2 0 1.99301 0.65145 9
 -8 2 0 1.47385 0.82586 29
 -8 2 0 0.77777 0.44304 3
 -8 2 0 1.26955 0.68054 13
 -8 2 0 1.60072 0.74508 7
 -8 2 0 0.90662 0.60807 10
 -8 2 0 1.92453 1.07144 31
 -8 2 0 1.58337 0.88693 24
 -8 2 0 0.81681 0.77488 11
 -8 2 0 1.27866 0.70144 7
 7 -2 0 32.4573 1.35716 5
 7 -2 0 33.6853 1.41143 18
 7 -2 0 29.4481 1.91164 32
 7 -2 0 32.7755 1.59633 7
 7 -2 0 34.2299 1.38047 9
 7 -2 0 35.811 1.54353 7
 7 -2 0 33.6823 1.57319 13
 7 -2 0 33.105 1.36056 8
 -7 2 0 32.0967 1.4205 5
 -7 2 0 32.8336 1.67088 24
 -7 2 0 31.5354 1.49198 10
 -7 2 0 32.6311 1.54769 7
 -7 2 0 36.3147 1.3617 3
 -7 2 0 34.4918 1.43483 13
 -7 2 0 34.0233 1.91185 31
 -7 2 0 34.4314 1.5554 11
 -7 2 0 34.2259 1.4078 29
 -7 2 0 33.8607 1.5581 7
 6 -2 0 34.0157 1.2806 18
 6 -2 0 31.432 1.73745 32
 6 -2 0 34.6414 1.35112 11
 6 -2 0 35.099 1.2615 5
 6 -2 0 34.407 1.24695 8
 6 -2 0 32.7194 1.23234 9
 6 -2 0 34.5884 1.3658 13
 6 -2 0 34.5801 1.44973 7
 6 -2 0 34.3158 1.40011 7
 -6 2 0 34.4807 1.43793 7
 -6 2 0 35.6172 1.25525 29
 -6 2 0 33.0517 1.07489 19
 -6 2 0 34.6897 1.41488 7
 -6 2 0 34.3243 1.38306 11
 -6 2 0 33.8424 1.29685 5
 -6 2 0 34.4088 1.24723 3
 -6 2 0 34.1526 1.27464 13
 5 -2 0 177.438 4.30833 7
 5 -2 0 177.69 4.42674 32
 5 -2 0 180.746 4.34044 7
 5 -2 0 176.081 3.98788 13
 5 -2 0 177.891 4.25124 11
 5 -2 0 178.694 3.89862 8
 5 -2 0 177.053 4.26856 5
 5 -2 0 175.327 4.00917 9
 -5 2 0 179.455 4.28873 5
 -5 2 0 179.047 3.97008 13
 -5 2 0 180.245 3.72069 21
 -5 2 0 177.014 4.26278 11
 -5 2 0 175.691 4.331 7
 -5 2 0 186.255 3.80788 29
 -5 2 0 176.24 4.29699 7
 -5 2 0 170.43 4.02212 19
 -5 2 0 179.345 4.24069 3
 4 -2 0 74.7455 1.82201 13
 4 -2 0 74.2671 2.14313 32
 4 -2 0 73.1826 1.96122 7
 4 -2 0 73.3543 1.89627 5
 4 -2 0 71.637 1.77899 8
 4 -2 0 71.2489 1.78389 9
 -4 2 0 72.6125 1.78988 13
 -4 2 0 71.7175 1.91693 11
 -4 2 0 72.8842 1.9562 7
 -4 2 0 73.6887 1.65025 29
 -4 2 0 72.0379 1.75653 19
 -4 2 0 71.0753 1.87991 3
 -4 2 0 73.3381 1.66027 21
 -4 2 0 73.2633 1.99065 7
 -4 2 0 72.0039 1.90125 5
 3 -2 0 1.29601 0.24681 19
 3 -2 0 1.74493 0.3335 7
 3 -2 0 0.47079 0.22135 8
 3 -2 0 1.2154 0.23556 5
 3 -2 0 1.20794 0.17597 16
 3 -2 0 0.86138 0.40417 32
 3 -2 0 0.74887 0.31659 7
 3 -2 0 1.38676 0.25495 3
 3 -2 0 1.5173 0.27819 13
 -3 2 0 0.98469 0.30575 7
 -3 2 0 1.01503 0.24717 13
 -3 2 0 1.1781 0.24673 5
 -3 2 0 0.71525 0.28172 10
 -3 2 0 0.99295 0.28771 7
 -3 2 0 1.51023 0.21738 29
 -3 2 0 1.34552 0.29575 11
 -3 2 0 1.11058 0.24087 3
 2 -2 0 1.09053 0.23408 8
 2 -2 0 0.62294 0.3808 32
 2 -2 0 0.89193 0.18667 5
 2 -2 0 0.91519 0.23007 19
 2 -2 0 1.02432 0.22463 13
 2 -2 0 1.0875 0.19975 3
 2 -2 0 0.97055 0.16847 29
 2 -2 0 0.59413 0.24605 7
 2 -2 0 1.12616 0.25671 12
 2 -2 0 1.06924 0.27618 7
 -2 2 0 0.89875 0.25784 7
 -2 2 0 0.86231 0.23864 8
 -2 2 0 0.82406 0.27342 7
 -2 2 0 0.65769 0.20553 13
 -2 2 0 1.12073 0.11196 1
 -2 2 0 1.41661 0.2741 10
 -2 2 0 1.48349 0.1687 29
 -2 2 0 1.07583 0.20396 5
 -2 2 0 0.98554 0.18928 3
 1 -2 0 949.983 18.1155 32
 1 -2 0 878.197 19.5229 28
 1 -2 0 939.806 18.5671 31
 1 -2 0 848.942 17.3281 22
 1 -2 0 858.477 17.132 8
 1 -2 0 952.13 16.5045 33
 1 -2 0 834.244 18.4124 10
 1 -2 0 876.297 19.0585 7
 1 -2 0 840.674 17.164 12
 1 -2 0 828.31 19.1955 3
 1 -2 0 851.812 19.2013 7
 -1 2 0 844.507 19.2307 3
 -1 2 0 838.693 19.2355 7
 -1 2 0 863.72 16.9457 12
 -1 2 0 945.303 18.3253 30
 -1 2 0 850.537 18.6443 10
 -1 2 0 851.545 17.1422 8
 -1 2 0 844.195 19.1824 7
 -1 2 0 861.709 19.4295 5
 0 -2 0 11.6768 0.38479 14
 0 -2 0 11.5798 0.33424 17
 0 -2 0 11.879 0.43141 10
 0 -2 0 12.309 0.43238 4
 0 -2 0 12.7789 0.56882 31
 0 -2 0 11.7389 0.45713 2
 0 -2 0 11.7302 0.48262 7
 0 -2 0 11.9636 0.49376 7
 0 -2 0 11.3436 0.40956 12
 0 -2 0 11.7893 0.32811 25
 0 2 0 12.6159 0.42997 12
 0 2 0 11.9908 0.46125 2
 0 2 0 11.2709 0.487 7
 0 2 0 12.8488 0.5611 30
 0 2 0 12.0501 0.42267 10
 0 2 0 11.8813 0.59304 24
 0 2 0 12.1798 0.4801 7
 -1 -2 0 9.03998 0.49235 9
 -1 -2 0 8.30534 0.33819 23
 -1 -2 0 8.8795 0.582 31
 -1 -2 0 9.17308 0.36799 20
 -1 -2 0 8.69193 0.45116 7
 -1 -2 0 8.96349 0.40544 2
 -1 -2 0 8.05782 0.56985 24
 -1 -2 0 8.85587 0.37247 4
 1 2 0 8.04805 0.55785 24
 1 2 0 8.72928 0.61593 32
 1 2 0 8.89697 0.46064 7
 1 2 0 8.73227 0.40943 2
 1 2 0 8.58874 0.36634 4
 1 2 0 8.69761 0.50835 9
 1 2 0 9.8576 0.49442 7
 1 2 0 8.72233 0.25816 6
 1 2 0 8.09609 0.52897 11
 -2 -2 0 82.377 1.99934 7
 -2 -2 0 81.4231 2.05074 11
 -2 -2 0 78.7709 1.91971 13
 -2 -2 0 81.1001 1.90264 4
 -2 -2 0 78.2523 2.00204 7
 -2 -2 0 80.1037 2.07259 2
 -2 -2 0 80.0062 1.91727 9
 -2 -2 0 79.7463 1.96845 24
 -2 -2 0 82.5708 2.09033 31
 2 2 0 81.0108 2.08187 2
 2 2 0 80.6999 1.77043 23
 2 2 0 81.6072 1.93286 9
 2 2 0 79.3126 1.99362 7
 2 2 0 80.7983 2.0107 7
 2 2 0 78.4827 2.02775 11
 2 2 0 80.1767 1.95868 24
 2 2 0 83.6802 2.06864 30
 2 2 0 78.4242 1.83555 15
 -3 -2 0 0.85133 0.34193 13
 -3 -2 0 0.65175 0.35768 24
 -3 -2 0 0.82198 0.32249 7
 -3 -2 0 0.55474 0.27261 9
 -3 -2 0 1.04078 0.29824 7
 -3 -2 0 1.01495 0.21441 15
 -3 -2 0 0.71653 0.45653 31
 -3 -2 0 0.60305 0.21098 18
 -3 -2 0 0.42142 0.32039 11
 3 2 0 0.94751 0.3119 11
 3 2 0 0.94235 0.26353 5
 3 2 0 0.9312 0.34245 7
 3 2 0 1.15652 0.3154 7
 3 2 0 0.82763 0.22196 2
 3 2 0 0.84651 0.41567 32
 3 2 0 0.93166 0.45884 30
 3 2 0 0.85151 0.30503 9
 3 2 0 0.65901 0.32018 24
 -4 -2 0 119.969 2.88216 9
 -4 -2 0 123.12 3.23869 31
 -4 -2 0 123.381 2.91068 13
 -4 -2 0 119.098 2.73681 18
 -4 -2 0 122.441 2.98141 24
 -4 -2 0 122.37 2.81034 15
 -4 -2 0 125.23 3.06204 7
 -4 -2 0 123.157 3.11226 11
 -4 -2 0 124.121 3.08821 7
 4 2 0 122.532 3.05974 7
 4 2 0 122.422 3.08223 7
 4 2 0 123.52 3.16424 2
 4 2 0 122.59 2.91055 9
 4 2 0 121.363 3.05316 5
 4 2 0 121.613 3.07488 11
 4 2 0 124.762 2.97137 24
 4 2 0 122.205 3.18449 32
 -5 -2 0 39.9278 1.72103 31
 -5 -2 0 40.0759 1.16782 15
 -5 -2 0 40.0806 1.40618 13
 -5 -2 0 41.281 1.51779 11
 -5 -2 0 39.7978 1.4763 24
 -5 -2 0 39.2674 1.33095 3
 -5 -2 0 41.1494 1.43112 7
 -5 -2 0 41.9007 1.33541 9
 5 2 0 39.9479 1.45336 11
 5 2 0 42.4311 1.37539 9
 5 2 0 38.9088 1.71027 32
 5 2 0 40.881 1.07944 21
 5 2 0 39.6649 1.48461 7
 5 2 0 42.8926 1.3323 2
 5 2 0 40.8522 1.3437 5
 5 2 0 39.0161 1.43866 7
 -6 -2 0 15.4291 1.08634 13
 -6 -2 0 14.7981 0.97758 9
 -6 -2 0 12.6856 0.89973 3
 -6 -2 0 11.4582 1.19913 31
 -6 -2 0 15.3993 0.82631 15
 -6 -2 0 13.9445 1.05493 7
 -6 -2 0 14.2093 1.23162 24
 -6 -2 0 13.4535 1.12097 7
 -6 -2 0 14.9747 1.19081 11
 6 2 0 13.3026 1.25825 32
 6 2 0 14.4835 0.66597 21
 6 2 0 13.2146 0.8822 5
 6 2 0 13.967 1.07527 7
 6 2 0 13.7321 0.89723 2
 6 2 0 14.1164 1.06627 9
 6 2 0 13.81 1.04591 11
 6 2 0 14.4476 1.19593 7
 -7 -2 0 3.37875 0.72663 7
 -7 -2 0 3.11294 0.78689 11
 -7 -2 0 3.67614 0.56374 3
 -7 -2 0 2.89431 0.55216 15
 -7 -2 0 1.73224 0.90479 31
 -7 -2 0 2.80934 0.6347 9
 -7 -2 0 3.50004 0.71681 7
 -7 -2 0 2.7578 0.69095 13
 -7 -2 0 4.36799 0.8715 24
 7 2 0 2.90788 0.54709 2
 7 2 0 2.82822 0.97174 32
 7 2 0 2.71405 0.70478 7
 7 2 0 2.90288 0.70922 11
 7 2 0 3.55361 0.73061 7
 7 2 0 3.08324 0.5445 5
 7 2 0 2.95143 0.69733 9
 -8 -2 0 11.7846 1.16681 7
 -8 -2 0 9.68361 1.05569 13
 -8 -2 0 11.1558 1.12685 15
 -8 -2 0 13.3234 1.45043 7
 -8 -2 0 14.9602 1.44 9
 -8 -2 0 8.52889 1.22991 31
 -8 -2 0 10.9714 1.24567 24
 -8 -2 0 14.2044 1.08586 3
 -8 -2 0 14.8224 1.74944 11
 8 2 0 12.4808 1.22265 8
 8 2 0 13.9055 1.5062 9
 8 2 0 9.96242 1.14075 7
 8 2 0 9.95207 1.07272 11
 8 2 0 11.0895 0.77079 1
 8 2 0 11.5605 0.98836 5
 8 2 0 13.6781 1.20659 2
 8 2 0 12.4759 1.12117 7
 8 2 0 11.1222 1.45554 32
 -9 -2 0 14.4703 1.57802 24
 -9 -2 0 13.9985 1.35035 7
 -9 -2 0 15.0432 1.32607 3
 -9 -2 0 11.5461 1.63766 31
 -9 -2 0 11.6372 1.29077 7
 -9 -2 0 14.3027 1.48771 11
 -9 -2 0 17.8711 1.95801 13
 9 2 0 18.0396 1.47587 8
 9 2 0 11.5304 1.25156 7
 9 2 0 18.6031 1.5163 2
 9 2 0 13.5432 1.40005 11
 9 2 0 11.5021 1.76769 32
 9 2 0 12.1715 1.76548 30
 9 2 0 15.4627 1.57463 7
 9 2 0 14.7798 1.25791 5
 9 2 0 13.8835 1.32996 9
 10 -3 0 1.31787 1.42876 32
 10 -3 0 1.83801 1.07442 7
 10 -3 0 0.10328 1.02034 5
 10 -3 0 0.69691 1.28254 13
 10 -3 0 1.69241 1.13162 18
 10 -3 0 0.60659 1.06586 9
 10 -3 0 -1.4793 1.07078 12
 10 -3 0 2.36449 1.49589 7
 -10 3 0 0.09691 0.85556 3
 -10 3 0 -1.6213 1.16391 13
 -10 3 0 -1.1923 1.18621 7
 -10 3 0 2.28943 1.18456 7
 -10 3 0 0.76877 1.20266 11
 -10 3 0 1.34905 1.4908 24
 -10 3 0 0.26994 1.33713 31
 9 -3 0 1.68153 0.84446 9
 9 -3 0 1.48773 0.92204 18
 9 -3 0 1.60083 0.53738 16
 9 -3 0 1.70485 0.80527 12
 9 -3 0 1.14376 0.62573 8
 9 -3 0 0.70167 1.0306 13
 9 -3 0 1.96375 1.10864 32
 9 -3 0 1.56624 1.11878 7
 9 -3 0 3.05441 0.88286 7
 9 -3 0 2.09939 0.79663 5
 -9 3 0 3.15917 1.16329 24
 -9 3 0 0.07867 0.56432 3
 -9 3 0 1.84825 1.23615 31
 -9 3 0 1.79483 0.9328 7
 -9 3 0 0.62161 0.89721 7
 -9 3 0 2.24475 0.74349 10
 -9 3 0 1.1974 0.9402 11
 -9 3 0 2.15881 0.94498 13
 8 -3 0 1.21077 0.5026 8
 8 -3 0 2.51219 0.71004 7
 8 -3 0 0.58695 0.98246 32
 8 -3 0 0.67104 0.75394 7
 8 -3 0 1.57319 0.63317 9
 8 -3 0 0.8013 0.7714 13
 8 -3 0 1.79678 0.60338 5
 8 -3 0 1.3889 0.7563 18
 8 -3 0 0.98418 0.45381 16
 -8 3 0 1.28739 0.74715 7
 -8 3 0 0.08298 0.70518 7
 -8 3 0 1.05492 0.76856 11
 -8 3 0 1.20633 0.50765 3
 -8 3 0 1.08444 1.04539 31
 -8 3 0 1.61145 0.62487 10
 -8 3 0 1.16279 0.71239 29
 -8 3 0 -0.035 0.58507 5
 -8 3 0 -0.8328 0.66877 13
 7 -3 0 84.9054 2.41103 13
 7 -3 0 78.4503 2.40839 5
 7 -3 0 84.8817 2.43708 18
 7 -3 0 81.3061 1.86988 16
 7 -3 0 90.0997 2.58794 7
 7 -3 0 78.2909 2.59988 7
 7 -3 0 80.5785 2.29511 9
 7 -3 0 84.2944 2.30405 8
 7 -3 0 82.6145 2.93579 32
 -7 3 0 83.4911 2.56648 7
 -7 3 0 84.5403 2.40666 3
 -7 3 0 86.2733 2.35085 13
 -7 3 0 81.9366 2.07915 29
 -7 3 0 84.0611 2.47067 5
 -7 3 0 87.1584 2.58268 10
 -7 3 0 83.9411 2.52711 11
 -7 3 0 82.1277 2.001 21
 -7 3 0 86.3015 2.61454 7
 6 -3 0 152.287 3.9048 7
 6 -3 0 153.917 3.82813 5
 6 -3 0 154.082 3.52899 8
 6 -3 0 149.526 4.10895 32
 6 -3 0 149.811 3.5964 9
 6 -3 0 150.233 3.12006 16
 6 -3 0 156.523 3.9506 7
 6 -3 0 155.668 3.61787 13
 -6 3 0 154.72 3.88064 10
 -6 3 0 156.871 3.96485 7
 -6 3 0 150.364 3.84256 11
 -6 3 0 155.246 3.58607 13
 -6 3 0 150.974 3.32078 21
 -6 3 0 156.336 3.86029 5
 -6 3 0 154.573 3.29814 29
 -6 3 0 155.763 3.80251 3
 -6 3 0 150.136 3.88807 7
 5 -3 0 71.758 1.85684 8
 5 -3 0 70.383 2.28002 32
 5 -3 0 70.2061 2.04092 7
 5 -3 0 70.0413 1.94286 5
 5 -3 0 70.5624 1.85262 9
 5 -3 0 70.191 1.88064 13
 5 -3 0 71.0577 1.52968 16
 -5 3 0 70.3292 1.7293 21
 -5 3 0 70.1983 1.99947 11
 -5 3 0 73.3427 2.07839 10
 -5 3 0 72.6258 1.63379 29
 -5 3 0 70.8911 1.96118 5
 -5 3 0 72.525 1.94717 3
 -5 3 0 71.0551 2.04532 7
 -5 3 0 72.8373 2.08949 7
 -5 3 0 73.4483 1.86497 13
 4 -3 0 1.79769 0.41758 7
 4 -3 0 1.20881 0.29781 3
 4 -3 0 1.44032 0.29081 5
 4 -3 0 1.97508 0.32912 19
 4 -3 0 0.61787 0.36781 7
 4 -3 0 1.46014 0.36014 13
 4 -3 0 1.7052 0.58139 32
 4 -3 0 2.10583 0.3494 8
 4 -3 0 1.45556 0.20522 16
 -4 3 0 0.98246 0.35515 10
 -4 3 0 1.55839 0.32913 13
 -4 3 0 2.00555 0.30433 3
 -4 3 0 1.5598 0.31406 5
 -4 3 0 1.55523 0.36733 11
 -4 3 0 1.31667 0.35261 7
 -4 3 0 1.27316 0.3732 7
 3 -3 0 2.58103 0.46711 32
 3 -3 0 2.93463 0.39648 7
 3 -3 0 2.43952 0.32997 12
 3 -3 0 3.01628 0.3721 7
 3 -3 0 3.42844 0.37668 5
 3 -3 0 2.42551 0.30731 13
 3 -3 0 2.91711 0.31404 19
 3 -3 0 2.72753 0.29626 3
 3 -3 0 2.94748 0.32313 8
 -3 3 0 2.37899 0.26015 3
 -3 3 0 2.37166 0.34958 7
 -3 3 0 3.15618 0.32604 29
 -3 3 0 2.5118 0.35193 7
 -3 3 0 3.04578 0.23361 1
 -3 3 0 2.86932 0.33176 11
 -3 3 0 2.38059 0.28001 5
 -3 3 0 3.04335 0.39366 10
 -3 3 0 2.24019 0.3213 8
 2 -3 0 14.4199 0.66816 10
 2 -3 0 13.8972 0.63057 7
 2 -3 0 15.1184 0.53497 3
 2 -3 0 14.7058 0.55687 8
 2 -3 0 16.4392 0.78916 31
 2 -3 0 15.5573 0.80276 32
 2 -3 0 14.9913 0.66907 7
 2 -3 0 15.1899 0.56351 13
 2 -3 0 15.3465 0.62807 12
 2 -3 0 16.8425 0.54678 33
 2 -3 0 15.0323 0.54803 5
 -2 3 0 14.8565 0.64261 10
 -2 3 0 14.6582 0.52099 3
 -2 3 0 14.834 0.54163 5
 -2 3 0 15.4522 0.4627 16
 -2 3 0 14.9327 0.58217 28
 -2 3 0 15.0531 0.57506 8
 -2 3 0 15.1096 0.65618 7
 1 -3 0 314.563 6.16094 12
 1 -3 0 299.27 6.9044 7
 1 -3 0 302.083 6.68369 10
 1 -3 0 328.941 6.7092 32
 1 -3 0 310.705 6.17046 8
 1 -3 0 326.757 5.95758 33
 1 -3 0 326.291 6.86844 31
 1 -3 0 303.689 6.8465 3
 1 -3 0 301.393 6.9196 7
 -1 3 0 305.494 6.84612 3
 -1 3 0 304.634 6.87473 4
 -1 3 0 326.066 6.76849 30
 -1 3 0 303.148 6.20042 22
 -1 3 0 307.025 6.67918 10
 -1 3 0 309.247 5.95407 33
 -1 3 0 309.181 6.17201 8
 -1 3 0 311.527 6.91323 7
 -1 3 0 302.01 6.91714 7
 -1 3 0 307.053 6.15992 12
 0 -3 0 15.6077 0.61546 2
 0 -3 0 15.1471 0.56491 4
 0 -3 0 15.2716 0.43914 25
 0 -3 0 16.2625 0.76907 31
 0 -3 0 15.9389 0.55824 12
 0 -3 0 15.0265 0.63902 7
 0 -3 0 15.8505 0.58022 10
 0 -3 0 15.284 0.66796 7
 0 -3 0 14.8032 0.43767 17
 0 -3 0 14.7609 0.50618 14
 0 3 0 14.9438 0.52371 8
 0 3 0 17.0084 0.80921 24
 0 3 0 14.4189 0.56105 12
 0 3 0 15.0881 0.56369 10
 0 3 0 15.3745 0.62113 2
 0 3 0 15.3583 0.55515 4
 0 3 0 15.7179 0.77896 30
 -1 -3 0 282.97 6.25894 24
 -1 -3 0 287.997 5.80667 23
 -1 -3 0 283.035 6.9745 2
 -1 -3 0 284.789 6.42013 7
 -1 -3 0 282.255 6.18692 9
 -1 -3 0 280.651 6.33964 4
 -1 -3 0 294.369 6.40658 31
 -1 -3 0 290.499 5.78346 20
 -1 -3 0 280.68 6.43597 7
 1 3 0 282.282 6.33865 4
 1 3 0 289.587 6.4425 7
 1 3 0 286.333 5.6808 12
 1 3 0 284.43 6.42337 7
 1 3 0 299.839 5.66721 6
 1 3 0 300.515 6.32729 30
 1 3 0 285.256 6.98176 2
 1 3 0 282.802 6.24969 24
 -2 -3 0 13.6582 0.68324 7
 -2 -3 0 15.4237 0.68591 7
 -2 -3 0 14.8039 0.58299 2
 -2 -3 0 15.1837 0.81139 31
 -2 -3 0 14.9231 0.77627 24
 -2 -3 0 14.5804 0.54979 4
 -2 -3 0 15.309 0.68876 9
 2 3 0 15.3618 0.52122 23
 2 3 0 15.2998 0.74288 24
 2 3 0 14.388 0.67264 7
 2 3 0 14.768 0.60281 2
 2 3 0 15.3722 0.79993 30
 2 3 0 15.4999 0.42872 26
 2 3 0 15.4018 0.71252 7
 2 3 0 15.3847 0.74021 11
 2 3 0 14.761 0.70304 9
 -3 -3 0 82.8069 2.12807 24
 -3 -3 0 81.598 2.12849 7
 -3 -3 0 80.557 2.19418 11
 -3 -3 0 79.9153 2.14921 7
 -3 -3 0 82.283 2.30249 31
 -3 -3 0 81.1991 2.15822 2
 -3 -3 0 83.305 1.99041 4
 -3 -3 0 81.2859 2.03597 9
 -3 -3 0 81.3629 2.07289 13
 3 3 0 79.0035 1.8528 23
 3 3 0 82.3952 2.17239 2
 3 3 0 81.3057 2.07045 9
 3 3 0 81.0892 2.11916 7
 3 3 0 81.9714 2.27374 32
 3 3 0 78.6211 2.08645 24
 3 3 0 79.2737 1.8861 15
 3 3 0 82.1614 2.16962 11
 -4 -3 0 31.9628 1.18406 13
 -4 -3 0 30.6938 1.00263 4
 -4 -3 0 29.6229 0.89713 18
 -4 -3 0 31.4439 1.09195 9
 -4 -3 0 29.5733 1.15143 7
 -4 -3 0 30.8522 1.41412 31
 -4 -3 0 29.3775 1.24282 11
 -4 -3 0 28.9113 1.22698 24
 -4 -3 0 30.5536 1.19679 7
 4 3 0 29.6363 1.03292 23
 4 3 0 31.5978 1.12336 5
 4 3 0 31.5509 1.18538 11
 4 3 0 28.8479 1.14138 7
 4 3 0 31.7383 1.21339 24
 4 3 0 31.0801 1.06238 2
 4 3 0 28.5242 1.38702 30
 4 3 0 30.4194 1.2133 7
 4 3 0 32.3489 1.15294 9
 4 3 0 30.5977 1.40602 32
 -5 -3 0 185.188 4.23566 18
 -5 -3 0 186.006 4.91142 31
 -5 -3 0 195.557 4.47198 13
 -5 -3 0 193.866 4.50961 4
 -5 -3 0 193.843 4.74913 7
 -5 -3 0 198.876 4.80682 11
 -5 -3 0 192.995 4.58624 24
 -5 -3 0 192.506 4.69752 7
 -5 -3 0 194.931 4.47071 9
 5 3 0 192.791 4.5041 9
 5 3 0 197.412 4.74797 7
 5 3 0 196.468 4.57272 24
 5 3 0 187.258 4.84418 32
 5 3 0 198.153 4.72096 7
 5 3 0 190.616 4.737 11
 5 3 0 194.59 4.91152 2
 5 3 0 190.982 4.86977 30
 5 3 0 192.446 4.72339 5
 -6 -3 0 13.4218 1.44692 31
 -6 -3 0 13.7959 1.3089 24
 -6 -3 0 13.1341 1.03358 9
 -6 -3 0 11.6277 1.12181 7
 -6 -3 0 13.208 0.90307 3
 -6 -3 0 11.9682 1.21206 11
 -6 -3 0 10.1203 1.04169 7
 -6 -3 0 11.3727 1.02652 13
 6 3 0 10.1373 1.14956 30
 6 3 0 12.2896 0.76294 21
 6 3 0 11.4083 1.09004 7
 6 3 0 13.6482 1.51214 32
 6 3 0 13.4558 0.88433 2
 6 3 0 10.9106 1.19063 7
 6 3 0 12.3915 1.11294 11
 6 3 0 12.089 1.11541 9
 6 3 0 11.3084 0.8433 5
 -7 -3 0 1.5572 0.78295 11
 -7 -3 0 1.60382 0.95982 31
 -7 -3 0 1.61096 0.63361 7
 -7 -3 0 1.99923 0.84854 24
 -7 -3 0 2.15501 0.6923 7
 -7 -3 0 2.36198 0.53914 3
 -7 -3 0 1.89697 0.67027 13
 -7 -3 0 2.43892 0.65503 9
 7 3 0 3.41046 1.1226 32
 7 3 0 2.47601 0.70585 9
 7 3 0 1.5515 0.78793 23
 7 3 0 2.49502 0.69459 7
 7 3 0 1.93854 0.40821 21
 7 3 0 1.5799 0.76856 7
 7 3 0 2.30246 0.54915 2
 7 3 0 1.62146 0.68761 11
 7 3 0 0.84478 0.9881 30
 7 3 0 0.83351 0.43586 5
 -8 -3 0 3.44367 1.12224 31
 -8 -3 0 3.04763 0.94189 13
 -8 -3 0 2.51629 0.86691 9
 -8 -3 0 1.24703 0.81229 7
 -8 -3 0 2.07035 0.57691 3
 -8 -3 0 4.23899 0.76335 4
 -8 -3 0 2.50207 0.98113 11
 -8 -3 0 1.82935 1.1139 24
 -8 -3 0 3.22199 0.93163 7
 8 3 0 3.29157 1.31054 32
 8 3 0 1.97409 1.29252 30
 8 3 0 2.29916 0.71098 2
 8 3 0 1.48792 0.75496 7
 8 3 0 5.00287 0.76201 8
 8 3 0 3.31559 0.55341 1
 8 3 0 2.69917 0.91832 9
 8 3 0 2.82952 0.91522 11
 8 3 0 1.91832 0.88554 7
 8 3 0 3.59638 0.58855 5
 8 3 0 3.11952 1.0045 23
 -9 -3 0 10.9966 1.08863 4
 -9 -3 0 9.8815 1.35441 7
 -9 -3 0 10.4634 1.5798 24
 -9 -3 0 12.1872 1.27655 9
 -9 -3 0 9.99752 1.25977 7
 -9 -3 0 12.7042 1.29362 3
 -9 -3 0 11.054 1.74734 31
 -9 -3 0 9.3021 1.28475 13
 9 3 0 10.159 1.00206 1
 9 3 0 11.5186 1.33558 7
 9 3 0 9.65012 1.72904 30
 9 3 0 12.9141 1.57031 7
 9 3 0 12.0964 1.46259 11
 9 3 0 10.8377 1.35495 9
 9 3 0 8.67864 1.15682 8
 9 3 0 8.73141 0.99874 2
 9 3 0 9.25368 1.71098 32
 9 3 0 11.6891 1.46229 23
 10 -4 0 7.54291 1.17919 7
 10 -4 0 3.73513 1.49805 32
 10 -4 0 2.98879 1.2222 12
 10 -4 0 5.56613 1.16666 9
 10 -4 0 4.02487 1.3675 13
 10 -4 0 3.5757 1.3677 7
 10 -4 0 4.89978 1.29063 18
 10 -4 0 3.16708 1.12765 5
 -10 4 0 3.1369 1.39116 7
 -10 4 0 6.43353 1.30619 7
 -10 4 0 5.48577 1.41094 11
 -10 4 0 3.49262 1.34093 31
 -10 4 0 5.97813 1.05799 3
 -10 4 0 7.12512 1.35161 13
 9 -4 0 8.02191 1.13933 13
 9 -4 0 5.225 1.37483 32
 9 -4 0 4.04517 0.73121 8
 9 -4 0 8.20807 0.96105 9
 9 -4 0 6.39474 0.95773 7
 9 -4 0 6.60029 1.06502 18
 9 -4 0 4.9816 0.84228 12
 9 -4 0 6.98515 1.14951 7
 9 -4 0 6.32826 0.93329 5
 -9 4 0 7.63936 1.14243 11
 -9 4 0 4.12993 1.09046 7
 -9 4 0 7.18275 1.00433 5
 -9 4 0 7.82351 1.0542 13
 -9 4 0 6.26016 0.88421 10
 -9 4 0 7.58096 1.13473 7
 -9 4 0 5.89085 1.26354 31
 -9 4 0 7.1207 0.82365 3
 8 -4 0 3.70816 0.83929 13
 8 -4 0 3.26663 0.73469 7
 8 -4 0 3.29685 1.17382 32
 8 -4 0 3.11699 0.67651 9
 8 -4 0 3.72984 0.9401 7
 8 -4 0 2.95693 0.73472 12
 8 -4 0 4.24869 0.69618 5
 8 -4 0 3.89443 0.89525 18
 8 -4 0 2.41775 0.5425 8
 -8 4 0 4.49214 0.82106 7
 -8 4 0 3.01465 0.57088 21
 -8 4 0 3.56615 0.8195 11
 -8 4 0 4.1349 0.62711 3
 -8 4 0 3.68378 0.76036 10
 -8 4 0 4.52611 0.85191 7
 -8 4 0 3.0984 0.7462 5
 -8 4 0 3.16097 0.75693 13
 7 -4 0 45.2508 2.25954 32
 7 -4 0 51.1438 1.78551 13
 7 -4 0 51.8163 1.89314 7
 7 -4 0 50.0254 1.74469 12
 7 -4 0 47.8654 1.71029 5
 7 -4 0 50.7852 1.98851 7
 7 -4 0 51.0067 1.64252 8
 7 -4 0 48.8995 1.67641 9
 -7 4 0 49 1.83914 11
 -7 4 0 47.7108 1.49498 21
 -7 4 0 51.6957 1.71283 3
 -7 4 0 48.003 1.8757 10
 -7 4 0 51.5095 1.72576 13
 -7 4 0 47.8277 1.86271 7
 -7 4 0 50.9879 1.80073 5
 -7 4 0 53.1206 1.97762 7
 6 -4 0 181.552 4.47713 5
 6 -4 0 183.418 4.61772 7
 6 -4 0 185.782 4.13065 8
 6 -4 0 179.715 4.22862 9
 6 -4 0 178.83 4.75929 32
 6 -4 0 184.114 4.14464 12
 6 -4 0 180.935 4.19015 13
 6 -4 0 187.509 4.59276 7
 -6 4 0 190.567 4.19201 13
 -6 4 0 186.717 4.45967 3
 -6 4 0 183.691 4.51375 10
 -6 4 0 183.28 4.49954 5
 -6 4 0 180.483 4.48908 11
 -6 4 0 185.298 4.00299 21
 -6 4 0 180.832 4.55457 7
 -6 4 0 183.184 4.61016 7
 5 -4 0 94.4901 2.79982 32
 5 -4 0 96.9708 2.37374 13
 5 -4 0 97.005 2.64695 7
 5 -4 0 97.8673 2.51486 3
 5 -4 0 94.7847 2.49547 5
 5 -4 0 95.5884 2.61914 7
 5 -4 0 98.9078 2.35518 8
 -5 4 0 96.5015 2.61315 7
 -5 4 0 93.875 2.62225 7
 -5 4 0 98.9617 2.60954 10
 -5 4 0 96.8435 2.48651 3
 -5 4 0 97.4515 2.52138 5
 -5 4 0 96.025 2.5437 11
 4 -4 0 57.6291 1.70772 7
 4 -4 0 57.4378 1.59349 5
 4 -4 0 57.6145 1.53946 13
 4 -4 0 58.1921 1.55805 19
 4 -4 0 58.0292 1.6016 12
 4 -4 0 58.2331 1.91432 32
 4 -4 0 59.1557 1.73666 7
 4 -4 0 58.7565 1.6027 3
 4 -4 0 57.7543 1.52914 8
 -4 4 0 57.7087 1.60795 5
 -4 4 0 59.0024 1.58424 3
 -4 4 0 59.7892 1.72012 7
 -4 4 0 57.1435 1.38807 1
 -4 4 0 58.4638 1.65379 11
 -4 4 0 59.9805 1.71859 10
 -4 4 0 57.5384 1.55605 8
 -4 4 0 57.2904 1.61346 28
 3 -4 0 64.7751 1.62933 12
 3 -4 0 64.1852 1.64592 5
 3 -4 0 66.584 1.94036 31
 3 -4 0 63.8433 1.77675 7
 3 -4 0 67.5211 1.51726 33
 3 -4 0 64.3797 1.63872 3
 3 -4 0 65.1897 1.55973 8
 3 -4 0 64.9294 1.5665 13
 3 -4 0 61.6918 1.73471 7
 3 -4 0 54.6303 1.85573 32
 -3 4 0 64.7798 1.62643 3
 -3 4 0 64.539 1.36696 16
 -3 4 0 63.6741 1.64925 5
 -3 4 0 63.6328 1.72934 10
 -3 4 0 61.4912 1.73095 7
 -3 4 0 63.4426 1.64742 28
 -3 4 0 62.0195 1.56894 8
 2 -4 0 101.108 2.27264 12
 2 -4 0 100.429 2.12365 22
 2 -4 0 102.169 2.51967 7
 2 -4 0 104.145 2.45844 10
 2 -4 0 101.726 2.22799 8
 2 -4 0 103.164 2.48151 28
 2 -4 0 103.327 2.63063 31
 2 -4 0 105.822 2.10116 33
 2 -4 0 106.243 2.59549 32
 2 -4 0 102.683 2.40794 3
 -2 4 0 105.119 2.59797 30
 -2 4 0 100.462 2.47578 4
 -2 4 0 99.1748 2.23052 8
 -2 4 0 102.237 2.53047 7
 -2 4 0 104.187 2.5138 7
 -2 4 0 101.312 2.44184 5
 -2 4 0 99.5379 2.27663 12
 -2 4 0 103.582 2.40336 3
 -2 4 0 99.6087 2.43028 10
 1 -4 0 147.338 3.47922 3
 1 -4 0 157.563 3.67862 31
 1 -4 0 152.465 3.17555 8
 1 -4 0 151.511 3.20723 12
 1 -4 0 152.063 3.60946 7
 1 -4 0 160.732 3.06512 33
 1 -4 0 156.604 3.59957 32
 1 -4 0 152.358 3.45811 10
 -1 4 0 151.673 3.44978 10
 -1 4 0 154.427 3.59642 7
 -1 4 0 151.089 3.18149 8
 -1 4 0 151.865 3.60356 7
 -1 4 0 150.095 3.54461 4
 -1 4 0 152.835 3.21661 12
 -1 4 0 159.459 3.6183 30
 -1 4 0 150.647 3.26479 14
 -1 4 0 155.456 3.16101 22
 0 -4 0 108.587 2.19327 25
 0 -4 0 107.816 2.56878 4
 0 -4 0 108.424 2.32799 12
 0 -4 0 106.48 2.25225 17
 0 -4 0 109.41 2.82199 2
 0 -4 0 108.31 2.50107 10
 0 -4 0 107.906 2.65609 7
 0 -4 0 110.196 2.37852 14
 0 -4 0 109.412 2.7315 31
 0 4 0 108.601 2.3306 12
 0 4 0 110.685 2.64385 7
 0 4 0 113.204 2.70315 30
 0 4 0 104.038 2.61191 7
 0 4 0 108.076 2.49139 10
 0 4 0 109.542 2.82409 2
 0 4 0 107.992 2.30982 8
 0 4 0 106.922 2.66052 24
 0 4 0 108.094 2.56138 4
 -1 -4 0 17.9391 0.90014 31
 -1 -4 0 17.4877 0.6917 2
 -1 -4 0 17.6377 0.75764 7
 -1 -4 0 18.2558 0.77808 9
 -1 -4 0 18.3651 0.78609 7
 -1 -4 0 18.0354 0.91901 24
 -1 -4 0 17.946 0.64637 4
 1 4 0 18.4295 0.65378 12
 1 4 0 17.5287 0.62653 4
 1 4 0 17.5276 0.74883 7
 1 4 0 18.7642 0.9048 30
 1 4 0 17.6765 0.71564 2
 1 4 0 18.2842 0.43806 6
 1 4 0 18.3536 0.59345 17
 1 4 0 17.8955 0.88035 24
 -2 -4 0 8.54747 0.64813 7
 -2 -4 0 9.67182 0.6488 7
 -2 -4 0 9.03294 0.8253 31
 -2 -4 0 8.17738 0.48176 20
 -2 -4 0 9.50329 0.80394 24
 -2 -4 0 8.64758 0.50276 4
 -2 -4 0 8.77547 0.51513 2
 -2 -4 0 8.10406 0.6463 9
 2 4 0 8.2418 0.54854 12
 2 4 0 8.10126 0.74232 24
 2 4 0 8.8666 0.36926 6
 2 4 0 8.47362 0.62696 7
 2 4 0 9.39028 0.7038 7
 2 4 0 8.64104 0.4882 4
 2 4 0 8.08489 0.80437 30
 2 4 0 7.38659 0.71482 11
 2 4 0 8.21825 0.43021 26
 2 4 0 8.4032 0.55443 2
 -3 -4 0 881.326 18.5133 9
 -3 -4 0 871.328 19.025 31
 -3 -4 0 862.571 21.0009 2
 -3 -4 0 867.153 19.111 4
 -3 -4 0 872.537 18.0081 13
 -3 -4 0 874.619 19.3206 7
 -3 -4 0 890.134 19.2958 7
 -3 -4 0 872.449 18.6162 24
 3 4 0 879.426 18.7879 30
 3 4 0 877.982 19.3806 11
 3 4 0 889.441 18.6094 32
 3 4 0 882.907 19.2926 7
 3 4 0 868.113 18.5997 24
 3 4 0 865.998 18.5174 9
 3 4 0 874.249 21.0103 2
 3 4 0 876.13 17.5742 23
 3 4 0 893.817 19.3237 7
 3 4 0 847.647 18.8806 15
 -4 -4 0 374.251 8.57075 7
 -4 -4 0 373.996 8.21485 9
 -4 -4 0 375.366 8.38368 4
 -4 -4 0 374.039 8.31917 24
 -4 -4 0 382.49 8.08617 13
 -4 -4 0 374.959 8.66511 31
 -4 -4 0 375.554 7.46156 27
 -4 -4 0 375.291 8.61078 7
 4 4 0 366.351 8.54048 30
 4 4 0 368.396 9.1966 2
 4 4 0 380.019 8.66889 5
 4 4 0 377.772 7.73157 23
 4 4 0 377.38 8.50523 32
 4 4 0 379.222 8.61417 7
 4 4 0 372.338 8.29521 24
 4 4 0 377.706 8.57994 7
 4 4 0 372.284 8.23884 9
 4 4 0 372.916 8.64336 11
 -5 -4 0 68.7146 2.16485 24
 -5 -4 0 66.9696 2.06164 7
 -5 -4 0 63.2026 2.36865 31
 -5 -4 0 66.4027 1.94403 9
 -5 -4 0 63.6024 1.67397 18
 -5 -4 0 67.9067 2.09599 7
 -5 -4 0 65.8975 1.83803 4
 -5 -4 0 67.6256 2.02935 13
 5 4 0 64.8394 1.98535 2
 5 4 0 66.9873 2.00712 5
 5 4 0 65.816 2.08971 11
 5 4 0 65.2452 2.39873 32
 5 4 0 66.3565 1.79452 23
 5 4 0 67.9312 2.09059 24
 5 4 0 67.3791 2.05455 7
 5 4 0 66.6686 2.1085 7
 5 4 0 64.4456 2.36626 30
 5 4 0 64.9081 2.00237 9
 -6 -4 0 7.06943 0.81779 7
 -6 -4 0 5.32674 0.72369 13
 -6 -4 0 5.46571 0.67479 9
 -6 -4 0 6.60548 0.78991 7
 -6 -4 0 5.4017 0.58244 4
 -6 -4 0 4.57247 0.95264 31
 -6 -4 0 5.99017 0.8799 24
 6 4 0 4.47804 0.72491 7
 6 4 0 5.47449 0.62399 5
 6 4 0 5.60128 0.67847 7
 6 4 0 6.12142 0.786 11
 6 4 0 4.68174 1.0102 30
 6 4 0 5.03911 1.04849 32
 6 4 0 4.70909 0.71799 9
 6 4 0 4.92497 0.71285 23
 6 4 0 5.13176 0.59283 2
 -7 -4 0 2.56515 0.72962 7
 -7 -4 0 3.11721 0.82129 7
 -7 -4 0 2.64522 0.59424 4
 -7 -4 0 2.34333 0.64619 13
 -7 -4 0 1.94183 1.0721 31
 -7 -4 0 3.40305 0.74883 9
 -7 -4 0 2.96705 0.96132 24
 -7 -4 0 2.23682 0.53912 3
 7 4 0 2.0965 0.80096 23
 7 4 0 0.65198 0.75684 7
 7 4 0 1.67683 0.79644 9
 7 4 0 1.68225 0.507 5
 7 4 0 1.55527 0.51213 21
 7 4 0 1.20007 1.06387 30
 7 4 0 2.56307 0.7337 11
 7 4 0 2.32594 1.09394 32
 7 4 0 1.9015 0.57989 2
 7 4 0 2.66652 0.72511 7
 -8 -4 0 0.84764 0.8279 9
 -8 -4 0 1.49189 0.8156 13
 -8 -4 0 1.42014 0.84192 7
 -8 -4 0 1.71171 0.98031 7
 -8 -4 0 2.19356 0.75172 4
 -8 -4 0 0.59395 1.20022 31
 -8 -4 0 1.29059 0.59891 3
 -8 -4 0 1.68609 1.21444 24
 8 4 0 2.89999 0.94702 7
 8 4 0 1.2879 0.92159 11
 8 4 0 1.26516 1.0313 23
 8 4 0 1.97372 0.70956 2
 8 4 0 1.12181 0.90383 7
 8 4 0 2.58153 1.34895 32
 8 4 0 2.80149 1.29999 30
 8 4 0 2.23212 0.96167 9
 8 4 0 1.72281 0.57211 5
 -9 -4 0 2.03818 1.27115 7
 -9 -4 0 3.74011 1.23886 9
 -9 -4 0 1.04027 1.1736 13
 -9 -4 0 2.80496 1.40736 31
 -9 -4 0 1.84934 0.94961 4
 -9 -4 0 1.07368 1.59091 24
 -9 -4 0 -0.0041 0.97327 7
 9 4 0 1.76315 0.93892 2
 9 4 0 2.1348 1.07531 7
 9 4 0 0.36584 0.99822 8
 9 4 0 3.3493 1.39433 23
 9 4 0 2.77268 1.46767 7
 9 4 0 2.66616 1.26298 9
 9 4 0 2.75646 1.56603 30
 9 4 0 3.57166 1.32852 11
 9 4 0 2.45302 0.70542 1
 9 4 0 4.86744 1.61796 32
 9 -5 0 2.20727 1.08621 18
 9 -5 0 0.3874 1.25603 32
 9 -5 0 3.62721 0.96401 7
 9 -5 0 0.9361 1.00701 13
 9 -5 0 1.04287 0.82077 5
 9 -5 0 -0.671 1.07801 7
 9 -5 0 2.46993 0.83315 9
 9 -5 0 1.37132 0.82271 12
 9 -5 0 2.35136 0.674 8
 -9 5 0 1.38073 0.83679 5
 -9 5 0 1.55655 0.74642 3
 -9 5 0 1.26923 0.95459 7
 -9 5 0 2.42157 0.97886 11
 -9 5 0 2.04796 0.7935 10
 -9 5 0 0.1908 0.82677 7
 8 -5 0 5.53334 0.72809 12
 8 -5 0 4.47044 0.66373 8
 8 -5 0 5.58795 0.96265 7
 8 -5 0 6.09564 0.79336 9
 8 -5 0 6.26739 0.92286 13
 8 -5 0 4.62216 1.20589 32
 8 -5 0 5.59042 0.7617 5
 8 -5 0 8.34829 0.98923 7
 -8 5 0 5.26047 0.85441 5
 -8 5 0 5.43369 0.72551 3
 -8 5 0 6.50519 0.9466 7
 -8 5 0 4.8827 0.73775 10
 -8 5 0 6.37982 0.72809 21
 -8 5 0 4.91979 0.8192 7
 -8 5 0 6.23825 0.92069 11
 7 -5 0 20.6911 1.48582 7
 7 -5 0 22.0422 1.22463 9
 7 -5 0 19.6646 1.74102 32
 7 -5 0 22.6189 1.41296 7
 7 -5 0 22.6831 1.12618 8
 7 -5 0 21.1334 1.22751 12
 7 -5 0 19.9856 1.1661 5
 7 -5 0 20.4246 1.31937 13
 -7 5 0 24.3444 1.44649 7
 -7 5 0 22.1969 1.20699 21
 -7 5 0 20.6832 1.28015 10
 -7 5 0 21.3964 1.37145 11
 -7 5 0 21.561 1.15424 3
 -7 5 0 21.0377 1.3984 7
 -7 5 0 23.3043 1.26985 5
 6 -5 0 82.4139 2.80153 32
 6 -5 0 82.2656 2.51481 7
 6 -5 0 83.4409 2.30377 5
 6 -5 0 82.6368 2.22102 13
 6 -5 0 81.0423 2.29532 3
 6 -5 0 84.3156 2.4798 7
 6 -5 0 78.1053 2.23146 12
 6 -5 0 85.3265 2.19782 8
 -6 5 0 82.9656 2.27134 3
 -6 5 0 79.9997 2.37884 11
 -6 5 0 85.1091 2.48522 7
 -6 5 0 75.9364 2.39909 10
 -6 5 0 82.6427 2.48533 7
 -6 5 0 82.1609 2.31521 5
 -6 5 0 81.2121 2.32654 28
 5 -5 0 16.8213 0.8673 8
 5 -5 0 17.2168 0.91411 13
 5 -5 0 18.188 1.01974 7
 5 -5 0 17.0304 0.87382 3
 5 -5 0 16.8775 0.86528 19
 5 -5 0 18.321 1.35051 32
 5 -5 0 18.5994 0.86152 5
 5 -5 0 18.4953 0.97086 12
 5 -5 0 18.438 1.0949 7
 -5 5 0 17.5783 1.03329 10
 -5 5 0 16.7222 0.93045 8
 -5 5 0 17.9011 0.92425 28
 -5 5 0 16.2408 0.98928 11
 -5 5 0 17.6287 0.81982 3
 -5 5 0 17.4666 1.04692 7
 -5 5 0 18.3446 0.88378 5
 -5 5 0 17.3999 1.06231 7
 -5 5 0 16.0108 0.65763 1
 4 -5 0 113.397 2.81289 3
 4 -5 0 117.104 3.14016 32
 4 -5 0 114.141 2.63181 8
 4 -5 0 113.333 2.80897 19
 4 -5 0 112.111 2.64725 13
 4 -5 0 114.922 2.83232 5
 4 -5 0 114.511 2.94376 7
 4 -5 0 120.032 2.56419 33
 4 -5 0 116.057 2.97661 7
 -4 5 0 113.697 2.6484 8
 -4 5 0 110.701 2.80766 28
 -4 5 0 114.878 2.96755 7
 -4 5 0 112.825 2.83295 5
 -4 5 0 112.492 2.78692 3
 -4 5 0 112.783 2.9331 7
 -4 5 0 116.74 2.90023 10
 3 -5 0 63.0207 1.95541 32
 3 -5 0 61.7183 1.76464 10
 3 -5 0 61.0375 1.39904 22
 3 -5 0 62.6274 1.59019 13
 3 -5 0 61.3649 1.96295 31
 3 -5 0 63.808 1.46914 33
 3 -5 0 62.2351 1.56405 8
 3 -5 0 62.6422 1.64313 12
 3 -5 0 62.8597 1.77953 7
 3 -5 0 63.248 1.80482 7
 3 -5 0 63.4725 1.6367 3
 -3 5 0 64.5027 1.74584 10
 -3 5 0 61.1255 1.77993 7
 -3 5 0 62.5447 1.41363 16
 -3 5 0 61.307 1.60732 3
 -3 5 0 62.3706 1.58351 8
 -3 5 0 64.4672 1.8164 7
 -3 5 0 63.4028 1.66399 5
 2 -5 0 83.6808 2.1039 10
 2 -5 0 75.603 2.26827 32
 2 -5 0 83.0793 1.95783 12
 2 -5 0 82.4 1.88567 8
 2 -5 0 83.4422 2.3307 31
 2 -5 0 82.1373 2.00961 3
 2 -5 0 79.9468 2.11935 28
 2 -5 0 86.2378 1.76147 33
 2 -5 0 85.4202 2.18346 7
 2 -5 0 82.032 2.15456 7
 -2 5 0 83.7558 2.15887 7
 -2 5 0 81.6372 2.16934 7
 -2 5 0 82.6171 2.05772 5
 -2 5 0 81.8574 2.07064 10
 -2 5 0 82.9763 1.9004 8
 -2 5 0 82.8433 2.00078 3
 -2 5 0 83.3335 2.27296 30
 -2 5 0 82.1645 1.97178 12
 -2 5 0 83.1889 2.11016 4
 1 -5 0 5.4285 0.52386 12
 1 -5 0 4.60196 0.51406 2
 1 -5 0 4.77361 0.37964 3
 1 -5 0 4.64225 0.41664 10
 1 -5 0 4.16504 0.56822 32
 1 -5 0 5.37396 0.63781 31
 1 -5 0 4.88905 0.49435 7
 1 -5 0 4.80732 0.43603 8
 1 -5 0 5.32828 0.56062 7
 -1 5 0 4.28994 0.37554 14
 -1 5 0 3.99931 0.40509 7
 -1 5 0 5.49694 0.49154 4
 -1 5 0 5.16862 0.4329 22
 -1 5 0 3.72295 0.39746 7
 -1 5 0 4.13106 0.39132 12
 -1 5 0 5.52522 0.63067 30
 -1 5 0 5.39889 0.47404 8
 -1 5 0 4.72204 0.50271 10
 0 -5 0 13.6472 0.65199 4
 0 -5 0 13.2575 0.42057 6
 0 -5 0 13.581 0.65837 2
 0 -5 0 12.5603 0.53972 14
 0 -5 0 12.5233 0.72232 7
 0 -5 0 12.7058 0.45713 17
 0 -5 0 13.3704 0.75776 7
 0 -5 0 12.7643 0.65834 10
 0 -5 0 13.1919 0.62576 12
 0 -5 0 12.5779 0.54426 25
 0 -5 0 13.459 0.91269 31
 0 5 0 12.7584 0.65728 12
 0 5 0 13.5463 0.70001 7
 0 5 0 12.7561 0.69249 2
 0 5 0 13.8137 0.63822 10
 0 5 0 12.8941 0.73539 7
 0 5 0 12.7827 0.58862 8
 0 5 0 13.2476 0.93183 24
 0 5 0 13.4175 0.60346 4
 0 5 0 13.4436 0.90516 30
 -1 -5 0 32.1194 1.07625 2
 -1 -5 0 31.5787 1.00494 4
 -1 -5 0 32.3081 1.13643 7
 -1 -5 0 33.5662 1.32469 31
 -1 -5 0 33.2088 1.15023 9
 -1 -5 0 32.5247 1.32397 24
 -1 -5 0 32.2815 0.94993 12
 -1 -5 0 32.1318 1.02783 10
 1 5 0 32.4574 1.26768 24
 1 5 0 31.999 1.09997 7
 1 5 0 31.8313 0.97897 12
 1 5 0 34.7035 1.32862 30
 1 5 0 33.4479 1.15638 7
 1 5 0 32.5415 0.87138 17
 1 5 0 31.76 0.8443 20
 1 5 0 31.6017 0.98461 4
 1 5 0 31.5635 1.10625 2
 -2 -5 0 367.109 8.26428 7
 -2 -5 0 357.831 7.39446 23
 -2 -5 0 367.53 8.30034 7
 -2 -5 0 360.267 8.93475 2
 -2 -5 0 365.255 8.08517 24
 -2 -5 0 363.902 8.12442 4
 -2 -5 0 366.442 7.39561 20
 -2 -5 0 370.432 7.98149 9
 -2 -5 0 367.85 8.30744 31
 2 5 0 368.271 8.27381 7
 2 5 0 366.661 8.15054 32
 2 5 0 362.711 8.05658 24
 2 5 0 364.529 8.18581 30
 2 5 0 370.379 8.30069 7
 2 5 0 365.528 8.11929 4
 2 5 0 361.106 8.94197 2
 2 5 0 356.66 7.21704 6
 2 5 0 358.639 7.28926 12
 2 5 0 364.614 8.3696 11
 -3 -5 0 246.264 6.19259 2
 -3 -5 0 250.692 5.97934 31
 -3 -5 0 247.706 5.83645 7
 -3 -5 0 254.537 5.62371 9
 -3 -5 0 244.624 5.71002 24
 -3 -5 0 247.933 5.5285 13
 -3 -5 0 248.696 5.17395 20
 -3 -5 0 248.307 5.64136 4
 -3 -5 0 251.564 5.80884 7
 3 5 0 243.678 6.20195 2
 3 5 0 249.883 5.80997 7
 3 5 0 250.279 5.90627 11
 3 5 0 244.186 5.87776 30
 3 5 0 246.858 5.10501 12
 3 5 0 245.697 5.67665 24
 3 5 0 251.383 5.8499 7
 3 5 0 244.887 5.85289 32
 3 5 0 243.961 5.51364 15
 -4 -5 0 95.9245 2.54743 9
 -4 -5 0 97.3933 2.60015 13
 -4 -5 0 99.3482 2.65932 2
 -4 -5 0 95.4249 2.44004 4
 -4 -5 0 95.0017 2.71122 24
 -4 -5 0 96.7048 2.63515 7
 -4 -5 0 95.7365 2.68147 7
 -4 -5 0 98.406 2.97868 31
 4 5 0 98.576 2.61532 9
 4 5 0 92.9386 2.26642 15
 4 5 0 96.429 2.897 30
 4 5 0 99.9361 2.65808 5
 4 5 0 92.5662 2.89133 32
 4 5 0 96.0344 2.68249 7
 4 5 0 94.8443 2.69721 11
 4 5 0 97.8131 2.6453 7
 4 5 0 96.167 2.67767 2
 4 5 0 96.5556 2.22045 23
 4 5 0 98.2329 2.64706 24
 -5 -5 0 26.7655 1.34709 7
 -5 -5 0 29.1075 1.57642 24
 -5 -5 0 28.4142 1.40864 7
 -5 -5 0 26.8285 1.03088 18
 -5 -5 0 30.7674 1.334 9
 -5 -5 0 28.9459 1.1421 4
 -5 -5 0 30.4357 1.38906 13
 -5 -5 0 28.0023 1.75197 31
 -5 -5 0 27.2004 1.05112 27
 5 5 0 27.5697 1.40712 9
 5 5 0 27.7102 1.10995 23
 5 5 0 30.5131 1.27614 5
 5 5 0 26.3479 1.67748 30
 5 5 0 28.1786 1.34823 11
 5 5 0 30.6089 1.36787 7
 5 5 0 28.0614 1.47249 24
 5 5 0 29.4326 1.43176 7
 5 5 0 29.5569 1.22695 2
 5 5 0 27.6549 1.81883 32
 -6 -5 0 1.23477 0.82141 24
 -6 -5 0 2.47757 0.70033 7
 -6 -5 0 0.15277 0.59159 9
 -6 -5 0 -0.0205 0.87911 31
 -6 -5 0 0.52924 0.40933 18
 -6 -5 0 -0.7632 0.5261 13
 -6 -5 0 0.71705 0.59822 7
 -6 -5 0 0.32136 0.48747 4
 6 5 0 0.02626 0.61705 7
 6 5 0 1.22811 0.5741 7
 6 5 0 0.93074 0.50663 2
 6 5 0 0.60719 0.74641 24
 6 5 0 1.17007 0.45288 5
 6 5 0 0.86925 0.60343 11
 6 5 0 1.22081 0.69723 9
 6 5 0 0.50454 0.88508 30
 6 5 0 2.37534 0.9849 32
 6 5 0 0.75039 0.61688 23
 -7 -5 0 15.608 1.39326 13
 -7 -5 0 16.9595 1.25905 4
 -7 -5 0 17.581 1.55521 9
 -7 -5 0 16.713 1.5962 7
 -7 -5 0 16.8203 1.58437 7
 -7 -5 0 17.0051 1.99378 31
 -7 -5 0 17.2969 1.95392 24
 -7 -5 0 17.3099 1.21163 3
 7 5 0 17.7877 1.48388 7
 7 5 0 16.3383 1.53853 11
 7 5 0 16.7547 1.24521 2
 7 5 0 17.6986 1.67091 9
 7 5 0 14.3552 1.45057 23
 7 5 0 17.1431 1.75132 32
 7 5 0 18.926 1.9523 30
 7 5 0 17.6416 1.14036 5
 7 5 0 19.8682 1.68435 7
 -8 -5 0 13.413 1.61027 24
 -8 -5 0 13.4205 1.7048 31
 -8 -5 0 13.4105 1.24489 13
 -8 -5 0 12.0979 1.28862 7
 -8 -5 0 17.7449 1.90403 7
 -8 -5 0 12.9941 1.3762 3
 -8 -5 0 18.9221 1.85619 9
 -8 -5 0 16.1399 1.52538 4
 8 5 0 13.0512 1.16757 21
 8 5 0 17.2507 1.50144 2
 8 5 0 18.096 1.80078 7
 8 5 0 15.7567 1.5517 7
 8 5 0 13.9457 1.34635 9
 8 5 0 13.533 1.24874 23
 8 5 0 13.6085 1.77866 32
 8 5 0 14.5285 1.27001 5
 8 5 0 14.934 1.44682 11
 8 5 0 12.6031 1.77821 30
 9 -6 0 -0.5944 1.29575 32
 9 -6 0 -2.2821 0.68095 8
 9 -6 0 -0.9359 0.85674 5
 9 -6 0 0.06179 0.87199 9
 9 -6 0 1.05151 0.8693 7
 9 -6 0 -1.4931 0.75227 12
 9 -6 0 -1.9933 1.06689 7
 9 -6 0 0.51227 1.13746 18
 9 -6 0 0.47109 1.02416 13
 -9 6 0 -0.4079 0.94841 7
 -9 6 0 -0.355 0.74629 10
 -9 6 0 0.38781 0.8244 21
 -9 6 0 -0.2883 1.05204 28
 -9 6 0 0.78377 0.98436 7
 -9 6 0 0.23951 0.86729 5
 -9 6 0 0.15818 0.7061 3
 -9 6 0 1.21123 1.0115 11
 8 -6 0 5.5321 1.28762 32
 8 -6 0 4.53011 0.94877 7
 8 -6 0 4.7175 0.76945 7
 8 -6 0 3.91763 0.7017 8
 8 -6 0 4.37131 0.79357 12
 8 -6 0 5.70158 0.77748 5
 8 -6 0 4.89323 0.80901 9
 8 -6 0 6.42578 0.92467 13
 -8 6 0 6.0484 0.83808 10
 -8 6 0 5.28805 0.99047 7
 -8 6 0 3.98555 0.69071 3
 -8 6 0 4.59403 0.9458 28
 -8 6 0 5.68627 0.83962 5
 -8 6 0 4.95014 0.92445 11
 -8 6 0 6.15877 0.84262 21
 -8 6 0 5.50565 0.9536 7
 7 -6 0 26.1215 1.23371 8
 7 -6 0 25.7519 1.41814 13
 7 -6 0 26.4753 1.30956 5
 7 -6 0 26.229 1.46661 7
 7 -6 0 25.689 1.66522 7
 7 -6 0 25.4391 2.02278 32
 7 -6 0 28.7898 1.38943 12
 7 -6 0 23.8445 1.3233 9
 -7 6 0 23.6906 1.22689 3
 -7 6 0 27.4415 1.56199 7
 -7 6 0 26.7359 1.41769 10
 -7 6 0 27.2708 1.38288 5
 -7 6 0 24.6885 1.42988 28
 -7 6 0 24.427 1.55381 7
 -7 6 0 25.9843 1.49846 11
 6 -6 0 5.09147 0.60887 19
 6 -6 0 5.37895 1.02912 32
 6 -6 0 4.63619 0.65232 12
 6 -6 0 4.88156 0.58298 8
 6 -6 0 4.30495 0.55012 5
 6 -6 0 5.69128 0.64934 13
 6 -6 0 4.97575 0.85923 33
 6 -6 0 5.00383 0.74283 7
 6 -6 0 5.16521 0.72265 7
 6 -6 0 5.95573 0.62937 3
 -6 6 0 4.44124 0.70601 7
 -6 6 0 5.65896 0.68318 10
 -6 6 0 5.2589 0.55971 3
 -6 6 0 5.53297 0.63129 28
 -6 6 0 5.29534 0.62026 5
 -6 6 0 3.54059 0.6049 7
 -6 6 0 5.82836 0.71338 11
 5 -6 0 4.49439 0.51155 8
 5 -6 0 4.15683 0.87288 32
 5 -6 0 4.22093 0.49109 3
 5 -6 0 4.6308 0.57622 19
 5 -6 0 4.29796 0.68493 7
 5 -6 0 3.35798 0.50242 12
 5 -6 0 3.82353 0.57849 7
 5 -6 0 4.75447 0.6947 33
 5 -6 0 3.60393 0.52199 13
 -5 6 0 5.17929 0.54567 5
 -5 6 0 4.63183 0.60503 10
 -5 6 0 4.51938 0.57054 8
 -5 6 0 4.00943 0.44347 3
 -5 6 0 4.53439 0.65407 7
 -5 6 0 4.11916 0.53045 28
 -5 6 0 3.99439 0.56944 7
 -5 6 0 4.64125 0.5868 11
 4 -6 0 2.13703 0.50711 33
 4 -6 0 2.51052 0.36888 3
 4 -6 0 1.50407 0.45766 7
 4 -6 0 3.09619 0.4343 13
 4 -6 0 2.693 0.3188 22
 4 -6 0 1.77965 0.45241 7
 4 -6 0 2.37801 0.42579 12
 4 -6 0 2.34715 0.7388 32
 4 -6 0 2.48973 0.42171 8
 4 -6 0 2.15786 0.59593 31
 -4 6 0 2.44551 0.38016 5
 -4 6 0 2.79753 0.45565 8
 -4 6 0 2.48053 0.46141 7
 -4 6 0 2.37741 0.43355 10
 -4 6 0 2.10803 0.32969 3
 -4 6 0 2.09839 0.48673 7
 -4 6 0 2.68959 0.31778 16
 3 -6 0 18.7195 1.22043 32
 3 -6 0 18.2252 0.76088 3
 3 -6 0 18.7424 0.87668 28
 3 -6 0 18.77 0.97938 7
 3 -6 0 19.3031 0.96051 7
 3 -6 0 17.1987 0.94535 10
 3 -6 0 18.2015 0.87193 12
 3 -6 0 18.7307 0.79118 8
 3 -6 0 19.807 0.75433 33
 3 -6 0 18.8804 1.18136 31
 -3 6 0 17.8916 0.97019 7
 -3 6 0 19.4478 0.90942 10
 -3 6 0 19.1529 0.72835 3
 -3 6 0 19.9404 1.19988 30
 -3 6 0 19.3042 0.84224 8
 -3 6 0 19.3056 0.97131 7
 -3 6 0 18.8318 0.78066 5
 2 -6 0 83.5301 2.03865 12
 2 -6 0 81.9515 2.37124 2
 2 -6 0 83.3318 1.94881 8
 2 -6 0 87.0231 2.48649 31
 2 -6 0 83.5447 2.25289 28
 2 -6 0 85.1553 2.28407 7
 2 -6 0 81.2375 2.24337 7
 2 -6 0 81.6754 2.41183 32
 2 -6 0 82.7968 2.06353 3
 2 -6 0 82.3776 2.17533 10
 2 -6 0 87.038 1.84012 33
 -2 6 0 82.0381 1.92998 14
 -2 6 0 85.703 2.25455 7
 -2 6 0 82.8844 2.26894 7
 -2 6 0 82.5928 2.14094 10
 -2 6 0 83.1028 2.17948 4
 -2 6 0 86.4919 1.75942 25
 -2 6 0 84.086 2.42068 30
 -2 6 0 84.9249 1.97322 8
 -2 6 0 80.267 2.04888 12
 1 -6 0 105.091 2.50741 3
 1 -6 0 104.049 2.85301 2
 1 -6 0 103.098 2.85501 31
 1 -6 0 102.795 2.38329 12
 1 -6 0 106.278 2.56347 10
 1 -6 0 100.394 2.67235 7
 1 -6 0 104.146 2.70446 7
 -1 6 0 104.828 2.60264 4
 -1 6 0 103.739 2.81549 30
 -1 6 0 106.92 2.31708 22
 -1 6 0 105.929 2.71872 7
 -1 6 0 102.996 2.53083 10
 -1 6 0 103.379 2.39812 12
 -1 6 0 107.448 2.70061 7
 -1 6 0 104.995 2.3383 8
 0 -6 0 11.9555 0.67929 2
 0 -6 0 10.3778 0.94306 31
 0 -6 0 9.50825 0.75788 7
 0 -6 0 10.5925 0.69392 10
 0 -6 0 10.6235 0.65297 12
 0 -6 0 10.8389 0.40983 6
 0 -6 0 10.4058 0.65786 4
 0 -6 0 10.0891 0.56485 14
 0 -6 0 10.1222 0.60094 25
 0 -6 0 10.8186 0.81347 7
 0 6 0 10.4137 0.68808 12
 0 6 0 11.1049 0.605 4
 0 6 0 9.89333 0.74635 7
 0 6 0 9.61467 0.70928 2
 0 6 0 11.0608 0.61102 8
 0 6 0 11.0474 0.96607 30
 0 6 0 10.7667 0.95212 24
 0 6 0 10.5229 0.73461 7
 -1 -6 0 0.38911 0.32304 10
 -1 -6 0 0.36951 0.25301 2
 -1 -6 0 0.51551 0.34315 7
 -1 -6 0 0.37942 0.31331 12
 -1 -6 0 -0.2137 0.51642 31
 -1 -6 0 0.22797 0.37481 9
 -1 -6 0 0.44871 0.30284 4
 -1 -6 0 0.52856 0.3825 7
 1 6 0 0.04329 0.24513 4
 1 6 0 0.32898 0.35439 7
 1 6 0 0.38695 0.24612 20
 1 6 0 0.57597 0.2688 17
 1 6 0 0.13203 0.4602 24
 1 6 0 0.19626 0.52047 30
 1 6 0 0.22676 0.28226 2
 1 6 0 0.45542 0.33009 12
 1 6 0 0.61507 0.3907 7
 -2 -6 0 49.4686 1.54582 2
 -2 -6 0 52.1357 1.59128 7
 -2 -6 0 48.994 1.57256 9
 -2 -6 0 49.1132 1.75857 24
 -2 -6 0 50.47 1.60938 7
 -2 -6 0 47.5518 1.20128 23
 -2 -6 0 48.9276 1.4215 4
 -2 -6 0 49.4542 1.87153 31
 2 6 0 49.1094 1.82155 30
 2 6 0 50.4017 1.56701 7
 2 6 0 48.9386 1.3704 12
 2 6 0 47.4669 1.67818 11
 2 6 0 48.846 1.85458 32
 2 6 0 47.451 1.68093 24
 2 6 0 49.0963 1.40812 4
 2 6 0 50.5466 1.33886 17
 2 6 0 48.7881 1.56669 2
 -3 -6 0 57.8371 1.99564 24
 -3 -6 0 56.7064 1.81864 13
 -3 -6 0 57.6127 1.84634 7
 -3 -6 0 59.9972 1.78564 9
 -3 -6 0 53.377 2.10231 31
 -3 -6 0 56.8084 1.74357 2
 -3 -6 0 57.6344 1.62267 4
 -3 -6 0 58.1787 1.46703 20
 -3 -6 0 58.1364 1.79801 7
 3 6 0 56.1801 1.78048 2
 3 6 0 57.8808 1.89239 11
 3 6 0 57.086 1.34129 26
 3 6 0 57.7342 1.8955 24
 3 6 0 58.561 1.83096 7
 3 6 0 57.9305 1.79576 7
 3 6 0 55.7155 1.55546 12
 3 6 0 54.5682 2.10507 32
 3 6 0 55.0116 2.0736 30
 -4 -6 0 71.7917 1.83838 20
 -4 -6 0 70.1566 2.16174 13
 -4 -6 0 71.5203 2.32353 24
 -4 -6 0 69.6369 1.94159 4
 -4 -6 0 70.0509 2.09242 2
 -4 -6 0 70.9199 2.08725 9
 -4 -6 0 71.585 2.165 7
 -4 -6 0 70.7978 2.20837 7
 -4 -6 0 69.9636 2.52786 31
 4 6 0 66.7254 1.75611 15
 4 6 0 69.6432 2.22635 24
 4 6 0 69.3777 2.137 2
 4 6 0 69.4768 1.8799 12
 4 6 0 72.1958 2.1943 7
 4 6 0 68.6219 2.52356 32
 4 6 0 71.8776 2.21523 7
 4 6 0 69.0774 2.23096 11
 4 6 0 66.5433 2.43808 30
 -5 -6 0 12.8426 1.174 7
 -5 -6 0 10.0757 1.025 27
 -5 -6 0 11.5009 1.25205 31
 -5 -6 0 10.5209 1.05198 20
 -5 -6 0 12.3908 1.10011 24
 -5 -6 0 11.2035 1.09668 9
 -5 -6 0 10.8057 1.13921 7
 -5 -6 0 13.0779 1.14555 13
 -5 -6 0 11.2846 0.92176 4
 5 6 0 10.5171 1.3125 32
 5 6 0 12.7884 1.06225 24
 5 6 0 10.5482 0.97655 2
 5 6 0 10.8608 1.2274 7
 5 6 0 10.9765 1.13516 7
 5 6 0 9.96224 1.19144 30
 5 6 0 11.4923 1.08252 11
 5 6 0 12.3243 0.95006 5
 -6 -6 0 2.17691 1.03058 31
 -6 -6 0 2.01664 0.76025 7
 -6 -6 0 2.15281 0.73601 20
 -6 -6 0 0.83853 0.5976 13
 -6 -6 0 2.93635 0.5361 18
 -6 -6 0 1.55633 0.98161 24
 -6 -6 0 3.25135 0.75484 7
 -6 -6 0 2.95157 0.58299 4
 -6 -6 0 2.09747 0.68601 9
 6 6 0 2.50054 0.6203 2
 6 6 0 2 1.0937 32
 6 6 0 1.73285 1.0744 30
 6 6 0 2.59556 0.63486 23
 6 6 0 2.33808 0.82625 7
 6 6 0 1.78349 0.89242 24
 6 6 0 1.83495 0.67287 11
 6 6 0 1.22964 0.61917 7
 6 6 0 2.97746 0.53554 5
 -7 -6 0 16.7278 1.65186 20
 -7 -6 0 15.1061 1.64891 7
 -7 -6 0 14.8516 1.6302 9
 -7 -6 0 12.6643 1.43093 24
 -7 -6 0 10.5091 1.24947 3
 -7 -6 0 15.6794 1.68403 7
 -7 -6 0 12.0338 1.61878 31
 -7 -6 0 14.3173 1.30818 4
 -7 -6 0 13.2895 1.36431 13
 7 6 0 14.5401 1.41926 23
 7 6 0 14.6758 1.16299 5
 7 6 0 14.6713 1.39672 7
 7 6 0 13.758 1.25792 11
 7 6 0 20.7338 1.60004 7
 7 6 0 15.2339 1.39854 2
 7 6 0 12.2017 1.63956 30
 7 6 0 10.8192 1.528 32
 -8 -6 0 7.25469 1.32771 20
 -8 -6 0 6.82028 1.39557 7
 -8 -6 0 6.29447 1.18816 7
 -8 -6 0 8.28117 1.63876 24
 -8 -6 0 6.43547 1.19059 9
 -8 -6 0 6.62429 0.9651 4
 -8 -6 0 5.64694 0.96359 3
 -8 -6 0 3.95258 1.40473 31
 -8 -6 0 6.95175 1.10148 13
 8 6 0 8.22203 1.28038 7
 8 6 0 5.28995 1.55609 30
 8 6 0 3.97701 0.73808 5
 8 6 0 6.71615 0.91255 21
 8 6 0 8.03558 1.02169 2
 8 6 0 5.61158 1.49125 32
 8 6 0 7.70074 1.4156 7
 8 6 0 7.80701 1.12565 23
 8 6 0 6.02967 1.25369 11
 9 -7 0 7.58814 1.0977 9
 9 -7 0 8.01556 1.05676 5
 9 -7 0 7.67098 1.21758 13
 9 -7 0 8.21439 1.69856 32
 9 -7 0 8.70733 1.44631 7
 9 -7 0 7.66329 0.96057 12
 9 -7 0 7.24802 0.99171 8
 9 -7 0 6.20327 1.03471 7
 9 -7 0 7.55752 1.58855 33
 -9 7 0 6.39768 1.21827 7
 -9 7 0 6.58182 1.09892 5
 -9 7 0 6.7045 1.08829 21
 -9 7 0 8.6535 1.27771 11
 -9 7 0 9.72771 1.28483 7
 -9 7 0 9.59194 1.10556 28
 -9 7 0 7.23208 0.9575 3
 -9 7 0 6.26894 0.97835 10
 8 -7 0 25.3558 1.48976 12
 8 -7 0 26.7446 1.51592 5
 8 -7 0 24.0905 1.60952 9
 8 -7 0 19.7834 2.19982 32
 8 -7 0 23.9466 1.43789 8
 8 -7 0 23.6018 2.03459 7
 8 -7 0 25.6166 1.71658 7
 8 -7 0 24.8391 1.72177 13
 8 -7 0 25.4002 2.16038 33
 -8 7 0 25.7671 1.72455 21
 -8 7 0 24.6958 1.49904 28
 -8 7 0 25.1646 1.78791 11
 -8 7 0 27.878 1.84718 7
 -8 7 0 26.6029 1.5768 10
 -8 7 0 22.4723 1.40489 3
 -8 7 0 24.2548 1.62901 5
 -8 7 0 25.6119 1.80232 7
 7 -7 0 22.2675 1.31616 12
 7 -7 0 20.1424 1.96939 32
 7 -7 0 21.0238 1.29874 5
 7 -7 0 21.7222 1.64922 7
 7 -7 0 20.1157 1.63757 33
 7 -7 0 19.7887 1.37636 13
 7 -7 0 24.5784 1.33762 3
 7 -7 0 23.4093 1.45805 7
 7 -7 0 22.3936 1.22305 8
 -7 7 0 20.9741 1.48099 11
 -7 7 0 20.4243 1.37437 10
 -7 7 0 19.2569 1.30897 5
 -7 7 0 21.2979 1.59278 7
 -7 7 0 20.4224 1.17346 3
 -7 7 0 17.5772 1.22055 28
 -7 7 0 21.9386 1.57664 7
 6 -7 0 14.6468 1.08369 12
 6 -7 0 15.7891 1.05084 3
 6 -7 0 15.8746 1.21999 7
 6 -7 0 13.7182 1.30798 7
 6 -7 0 15.0105 0.99744 8
 6 -7 0 15.3237 1.28698 33
 6 -7 0 14.707 1.12241 13
 6 -7 0 13.2847 1.10865 19
 6 -7 0 14.6934 1.47591 32
 -6 7 0 14.2071 1.2526 7
 -6 7 0 16.8693 1.06567 5
 -6 7 0 13.5357 1.20621 11
 -6 7 0 14.867 0.94663 3
 -6 7 0 16.6142 1.15522 10
 -6 7 0 14.9222 1.25598 7
 -6 7 0 14.2324 1.1018 8
 5 -7 0 0.16076 0.32922 22
 5 -7 0 0.17562 0.57155 7
 5 -7 0 0.98654 0.46243 13
 5 -7 0 0.32673 0.52921 19
 5 -7 0 0.72323 0.50606 7
 5 -7 0 0.00378 0.39057 3
 5 -7 0 -0.4022 0.7259 32
 5 -7 0 0.11623 0.41081 8
 5 -7 0 0.2678 0.60735 33
 5 -7 0 0.24389 0.44177 12
 -5 7 0 0.66101 0.4188 5
 -5 7 0 0.28846 0.45235 8
 -5 7 0 -0.3452 0.3684 4
 -5 7 0 0.48054 0.47071 10
 -5 7 0 0.38311 0.35927 3
 -5 7 0 1.00693 0.49888 7
 -5 7 0 0.72813 0.51062 7
 4 -7 0 5.3047 0.94016 32
 4 -7 0 3.31265 0.49472 13
 4 -7 0 4.70532 0.66266 7
 4 -7 0 4.19244 0.88595 31
 4 -7 0 4.92644 0.57396 33
 4 -7 0 4.80241 0.51966 8
 4 -7 0 4.56389 0.55198 12
 4 -7 0 3.4498 0.52312 7
 4 -7 0 4.54508 0.45341 3
 -4 7 0 4.47534 0.51914 8
 -4 7 0 4.82015 0.54303 4
 -4 7 0 4.493 0.63751 7
 -4 7 0 4.50093 0.43327 3
 -4 7 0 4.30843 0.52231 10
 -4 7 0 4.09046 0.47774 5
 -4 7 0 4.6107 0.42567 16
 -4 7 0 4.16069 0.5486 7
 3 -7 0 60.328 1.6202 8
 3 -7 0 65.4771 1.49321 33
 3 -7 0 62.4241 1.91432 7
 3 -7 0 60.7355 1.7923 28
 3 -7 0 61.3451 1.67487 3
 3 -7 0 61.6849 2.17945 31
 3 -7 0 61.0312 2.142 32
 3 -7 0 60.2174 1.8382 10
 3 -7 0 59.1073 1.86163 7
 3 -7 0 61.6078 1.72133 12
 3 -7 0 61.1321 1.92882 2
 -3 7 0 60.1786 1.76864 12
 -3 7 0 59.9597 1.79952 10
 -3 7 0 60.5453 1.71815 5
 -3 7 0 61.1838 1.87582 7
 -3 7 0 60.5947 1.79291 4
 -3 7 0 59.6378 2.09966 30
 -3 7 0 61.9873 1.65692 3
 -3 7 0 62.5522 1.47153 25
 -3 7 0 62.5503 1.66507 8
 -3 7 0 63.323 1.91559 7
 2 -7 0 585.471 12.7011 32
 2 -7 0 575.824 13.0208 7
 2 -7 0 573.138 12.9894 31
 2 -7 0 577.256 12.8578 3
 2 -7 0 582.934 13.0576 7
 2 -7 0 573.236 12.5801 10
 2 -7 0 574.509 14.1946 2
 2 -7 0 585.135 11.6063 8
 2 -7 0 593.713 11.6015 12
 2 -7 0 592.91 13.2635 28
 -2 7 0 562.201 12.0627 14
 -2 7 0 575.301 13.0464 7
 -2 7 0 578.777 13.0187 7
 -2 7 0 593.214 12.9416 4
 -2 7 0 582.278 11.6122 12
 -2 7 0 580.18 12.8142 30
 -2 7 0 580.636 12.5599 10
 -2 7 0 579.07 11.6097 8
 1 -7 0 110.399 2.65501 3
 1 -7 0 111.708 3.03064 2
 1 -7 0 108.767 2.86221 7
 1 -7 0 106.575 2.70895 10
 1 -7 0 106.475 2.3485 17
 1 -7 0 112.171 2.54935 12
 1 -7 0 108.636 2.89761 7
 1 -7 0 108.84 3.09729 31
 -1 7 0 106.409 2.86593 7
 -1 7 0 110.54 2.46776 22
 -1 7 0 108.726 2.88828 7
 -1 7 0 108.883 2.69119 10
 -1 7 0 109.707 2.48416 8
 -1 7 0 110.687 3.05556 30
 -1 7 0 108.676 2.56303 12
 -1 7 0 110.229 2.98672 24
 -1 7 0 109.615 2.75839 4
 0 -7 0 30.217 1.09027 10
 0 -7 0 28.2746 1.23294 7
 0 -7 0 29.2061 1.01522 12
 0 -7 0 29.8422 1.13585 2
 0 -7 0 27.4885 1.16306 9
 0 -7 0 27.6302 1.18643 7
 0 -7 0 25.7417 0.91969 25
 0 -7 0 29.6881 1.06935 4
 0 -7 0 29.1332 0.92246 14
 0 -7 0 28.7382 1.44887 31
 0 -7 0 29.637 0.75658 6
 0 7 0 28.3999 1.06068 12
 0 7 0 27.826 1.17743 7
 0 7 0 27.0896 1.13789 7
 0 7 0 28.0021 0.97767 8
 0 7 0 28.5102 1.02138 4
 0 7 0 30.2021 1.44351 30
 0 7 0 29.8957 1.36837 24
 -1 -7 0 2.4959 0.42263 14
 -1 -7 0 2.09395 0.40273 10
 -1 -7 0 2.38132 0.49332 7
 -1 -7 0 2.0255 0.35166 2
 -1 -7 0 2.41315 0.50284 7
 -1 -7 0 2.6966 0.41405 12
 -1 -7 0 2.85578 0.50543 9
 -1 -7 0 2.19774 0.39019 4
 -1 -7 0 2.09618 0.71294 31
 1 7 0 2.67274 0.47469 7
 1 7 0 2.87204 0.38723 4
 1 7 0 2.41329 0.43983 12
 1 7 0 2.76268 0.4483 2
 1 7 0 1.94291 0.62845 30
 1 7 0 2.73736 0.32804 20
 1 7 0 2.47808 0.51087 7
 1 7 0 3.21116 0.64221 24
 -2 -7 0 165.077 4.10848 7
 -2 -7 0 165.659 3.89364 10
 -2 -7 0 166.019 4.39057 31
 -2 -7 0 162.735 4.14767 7
 -2 -7 0 167.374 4.34364 2
 -2 -7 0 159.421 3.49307 23
 -2 -7 0 165.128 3.9536 4
 -2 -7 0 163.599 4.00561 9
 2 7 0 168.146 4.12974 7
 2 7 0 164.519 4.36 2
 2 7 0 170.032 4.15438 7
 2 7 0 160.741 4.29091 30
 2 7 0 163.609 4.22956 11
 2 7 0 169.199 3.9443 4
 2 7 0 166.339 3.5751 17
 2 7 0 163.981 3.60578 12
 2 7 0 163.544 4.33623 32
 2 7 0 165.698 4.1345 24
 -3 -7 0 61.8822 2.21 24
 -3 -7 0 60.8361 1.97065 7
 -3 -7 0 61.1706 1.99205 13
 -3 -7 0 61.0847 2.36045 31
 -3 -7 0 63.4808 1.95845 9
 -3 -7 0 60.5519 1.78806 4
 -3 -7 0 63.6608 1.94218 2
 -3 -7 0 61.325 2.01427 7
 3 7 0 62.9683 2.04331 7
 3 7 0 61.03 1.96659 2
 3 7 0 64.2723 2.12808 24
 3 7 0 63.8752 1.77614 4
 3 7 0 63.2434 1.75207 17
 3 7 0 61.6963 2.08656 11
 3 7 0 62.6946 1.99334 7
 3 7 0 64.5415 2.39008 32
 3 7 0 61.0311 1.52741 26
 3 7 0 60.102 2.29866 30
 3 7 0 61.9362 1.72945 12
 -4 -7 0 44.7699 1.75044 7
 -4 -7 0 42.0671 2.10804 31
 -4 -7 0 42.7985 1.6015 9
 -4 -7 0 44.4645 1.46747 4
 -4 -7 0 41.5405 1.70196 13
 -4 -7 0 42.4819 1.70505 7
 -4 -7 0 42.2014 1.9904 24
 -4 -7 0 42.09 1.5416 2
 -4 -7 0 42.8228 1.34557 20
 4 7 0 43.365 1.49516 12
 4 7 0 45.3763 1.78578 7
 4 7 0 42.4146 1.66143 7
 4 7 0 40.4949 1.30252 15
 4 7 0 39.3262 2.05534 30
 4 7 0 41.0807 2.07015 32
 4 7 0 44.3913 1.90356 24
 4 7 0 43.2412 1.6026 2
 4 7 0 41.8365 1.75021 11
 -5 -7 0 3.68998 0.74266 13
 -5 -7 0 3.84389 0.78517 27
 -5 -7 0 4.53385 0.97998 24
 -5 -7 0 3.22453 0.70311 7
 -5 -7 0 3.33348 0.69039 20
 -5 -7 0 3.27679 0.57985 4
 -5 -7 0 4.23694 0.69108 9
 -5 -7 0 5.20255 1.15209 31
 -5 -7 0 4.40299 0.74322 7
 5 7 0 4.88238 1.14161 32
 5 7 0 4.03018 0.6593 2
 5 7 0 3.53341 0.60919 11
 5 7 0 4.73883 0.7361 7
 5 7 0 6.04287 0.97365 24
 5 7 0 3.54027 0.58971 5
 5 7 0 3.58505 0.7528 7
 5 7 0 4.20386 0.68839 12
 5 7 0 5.34311 1.10399 30
 -6 -7 0 0.62543 1.03136 24
 -6 -7 0 2.38477 0.78051 7
 -6 -7 0 3.41584 0.78653 9
 -6 -7 0 0.92144 1.13006 31
 -6 -7 0 2.10712 0.60995 18
 -6 -7 0 1.89261 0.77636 7
 -6 -7 0 3.54874 0.84382 20
 -6 -7 0 2.84434 0.63524 4
 -6 -7 0 2.3761 0.6285 13
 6 7 0 3.35889 0.77674 7
 6 7 0 2.03377 1.17352 32
 6 7 0 0.855 0.71087 11
 6 7 0 4.7053 0.99187 7
 6 7 0 1.81083 1.29312 30
 6 7 0 1.51439 0.51126 5
 6 7 0 1.98586 0.99632 24
 6 7 0 1.83673 0.67951 2
 6 7 0 3.20054 0.78162 12
 -7 -7 0 6.3578 0.86496 4
 -7 -7 0 9.54966 1.23645 7
 -7 -7 0 6.74564 1.24054 7
 -7 -7 0 7.55053 1.10707 9
 -7 -7 0 6.21925 1.51156 31
 -7 -7 0 7.40836 1.4761 24
 -7 -7 0 8.3242 1.13557 20
 -7 -7 0 5.95075 1.00061 13
 7 7 0 8.05656 1.60686 32
 7 7 0 6.86753 1.27319 7
 7 7 0 8.23682 1.38807 24
 7 7 0 7.57457 0.94859 2
 7 7 0 6.80737 0.76298 5
 7 7 0 8.40162 1.53677 30
 7 7 0 6.6142 1.01935 11
 7 7 0 7.4935 1.05341 7
 9 -8 0 4.48451 1.57399 33
 9 -8 0 4.30256 1.04412 7
 9 -8 0 5.33118 1.50148 7
 9 -8 0 4.03068 1.53888 32
 9 -8 0 4.40456 1.15986 9
 9 -8 0 3.58032 0.95214 8
 9 -8 0 4.23431 1.19272 13
 -9 8 0 4.29319 1.00557 3
 -9 8 0 2.6491 1.17659 21
 -9 8 0 4.9346 1.13052 5
 -9 8 0 2.3564 1.00249 10
 -9 8 0 3.15741 1.2333 11
 -9 8 0 3.94129 1.26308 7
 -9 8 0 4.2901 1.14979 7
 8 -8 0 10.3907 1.01161 8
 8 -8 0 9.51287 1.03254 9
 8 -8 0 11.1564 1.43895 33
 8 -8 0 7.80519 1.48852 32
 8 -8 0 8.69733 0.87897 12
 8 -8 0 10.1383 1.17191 7
 8 -8 0 9.93919 1.07411 13
 8 -8 0 9.6937 1.39859 7
 -8 8 0 10.8244 1.06692 5
 -8 8 0 9.80086 1.15318 11
 -8 8 0 9.15752 0.88727 3
 -8 8 0 9.63709 1.18512 7
 -8 8 0 9.69796 1.01984 10
 -8 8 0 9.13587 1.12589 7
 7 -8 0 2.26285 0.74622 7
 7 -8 0 3.68103 0.61843 22
 7 -8 0 2.86228 0.74773 13
 7 -8 0 3.37067 0.81197 19
 7 -8 0 3.74374 0.71475 3
 7 -8 0 2.02246 1.16615 32
 7 -8 0 2.94942 0.70617 8
 7 -8 0 3.35881 0.68424 12
 7 -8 0 3.72867 0.96516 7
 7 -8 0 2.89186 1.04541 33
 -7 8 0 3.20338 0.72382 5
 -7 8 0 3.21114 0.84466 7
 -7 8 0 3.49609 0.84765 11
 -7 8 0 2.44204 0.57085 3
 -7 8 0 3.89071 0.87602 7
 -7 8 0 2.72199 0.76894 10
 -7 8 0 2.59048 0.61473 4
 6 -8 0 2.93502 0.60764 3
 6 -8 0 2.76233 0.71925 19
 6 -8 0 2.89288 0.56476 8
 6 -8 0 3.39476 0.87552 33
 6 -8 0 2.89245 0.64473 7
 6 -8 0 3.5052 0.59548 12
 6 -8 0 2.81019 0.43646 22
 6 -8 0 2.16881 0.66353 13
 6 -8 0 3.35131 1.14919 32
 6 -8 0 2.64876 0.80366 7
 -6 8 0 2.98609 0.71672 7
 -6 8 0 3.45433 0.73919 11
 -6 8 0 1.78041 0.62096 10
 -6 8 0 3.03698 0.64105 8
 -6 8 0 2.6653 0.53303 4
 -6 8 0 2.95902 0.7515 7
 -6 8 0 2.66917 0.60897 5
 -6 8 0 2.52637 0.50192 3
 5 -8 0 1.46234 0.83385 31
 5 -8 0 1.40896 0.52046 12
 5 -8 0 1.9458 0.50192 3
 5 -8 0 2.01655 0.55528 13
 5 -8 0 1.56967 0.48172 8
 5 -8 0 2.12442 0.66692 33
 5 -8 0 1.7344 0.68631 19
 5 -8 0 2.2241 0.572 7
 5 -8 0 1.71761 0.87573 32
 5 -8 0 1.08132 0.63357 7
 -5 8 0 1.97406 0.65738 7
 -5 8 0 1.85841 0.44773 3
 -5 8 0 1.94124 0.65477 7
 -5 8 0 2.18213 0.57808 8
 -5 8 0 0.80979 0.49153 10
 -5 8 0 1.99159 0.40683 16
 -5 8 0 1.0283 0.40444 4
 -5 8 0 1.41307 0.48461 5
 4 -8 0 41.4675 1.47927 12
 4 -8 0 40.8191 1.99216 32
 4 -8 0 41.5937 1.38339 3
 4 -8 0 39.1313 1.98951 31
 4 -8 0 41.9709 1.44163 13
 4 -8 0 40.8518 1.56535 2
 4 -8 0 41.0533 1.26339 33
 4 -8 0 44.0099 1.39649 8
 4 -8 0 40.9847 1.66785 7
 4 -8 0 43.0743 1.60259 7
 -4 8 0 37.4739 1.46055 4
 -4 8 0 41.3245 1.5681 10
 -4 8 0 43.2062 1.43457 8
 -4 8 0 43.2486 1.32208 25
 -4 8 0 41.2918 1.61157 7
 -4 8 0 42.1493 1.28251 16
 -4 8 0 42.3173 1.65576 7
 -4 8 0 43.0523 1.34911 3
 -4 8 0 41.8496 1.41986 5
 3 -8 0 140.073 3.19053 8
 3 -8 0 137.104 3.87637 32
 3 -8 0 145.625 3.31807 12
 3 -8 0 142.304 3.6689 7
 3 -8 0 142.205 3.88261 2
 3 -8 0 137.651 3.96066 31
 3 -8 0 141.636 3.42247 3
 3 -8 0 136.947 3.59 28
 3 -8 0 136.643 3.52995 10
 3 -8 0 142.42 3.68885 7
 -3 8 0 142.331 3.22742 8
 -3 8 0 141.998 3.49739 5
 -3 8 0 138.722 3.18295 14
 -3 8 0 143.985 3.69384 7
 -3 8 0 141.428 3.90412 30
 -3 8 0 140.022 3.6437 7
 -3 8 0 143.847 2.91616 25
 -3 8 0 141.55 3.50444 10
 -3 8 0 143.433 3.34303 12
 -3 8 0 139.902 3.55902 4
 2 -8 0 200.996 4.3943 12
 2 -8 0 201.198 5.18484 31
 2 -8 0 202.65 4.95673 7
 2 -8 0 204.853 5.02545 28
 2 -8 0 203.453 5.29288 2
 2 -8 0 203.885 4.31652 8
 2 -8 0 203.308 4.6897 3
 2 -8 0 200.513 4.92391 7
 2 -8 0 200.629 4.73049 10
 2 -8 0 198.928 5.05638 32
 -2 8 0 202.068 4.69479 10
 -2 8 0 202.972 4.19912 22
 -2 8 0 193.326 4.33243 14
 -2 8 0 197.308 4.41199 12
 -2 8 0 197.394 5.06682 30
 -2 8 0 205.87 4.9351 7
 -2 8 0 195.936 4.32244 8
 -2 8 0 199.157 4.94652 7
 -2 8 0 207.258 4.83365 4
 1 -8 0 94.6232 2.45215 10
 1 -8 0 94.5982 2.29664 12
 1 -8 0 90.6645 2.876 31
 1 -8 0 91.3509 2.33929 3
 1 -8 0 88.4346 2.02033 17
 1 -8 0 90.5022 2.61263 7
 1 -8 0 93.1856 2.68825 2
 1 -8 0 93.7871 2.58552 7
 -1 8 0 91.3249 2.20081 22
 -1 8 0 89.3623 2.74838 24
 -1 8 0 92.768 2.84627 30
 -1 8 0 94.5591 2.45208 4
 -1 8 0 93.1202 2.40753 10
 -1 8 0 93.4649 2.6305 7
 -1 8 0 93.2091 2.59404 7
 -1 8 0 93.2056 2.22746 8
 -1 8 0 91.8403 2.31844 12
 0 -8 0 37.9776 1.16594 25
 0 -8 0 38.6148 1.48739 7
 0 -8 0 38.5094 1.34306 10
 0 -8 0 40.0219 1.80643 31
 0 -8 0 39.0683 0.96436 6
 0 -8 0 38.5574 1.27697 12
 0 -8 0 41.1167 1.44303 2
 0 -8 0 37.3173 1.4416 9
 0 -8 0 39.4794 1.36055 4
 0 -8 0 38.1826 1.52567 7
 0 -8 0 40.0046 1.15969 14
 0 8 0 39.5646 1.43119 7
 0 8 0 38.0326 1.22554 8
 0 8 0 38.4019 1.63524 24
 0 8 0 41.3745 1.50788 7
 0 8 0 38.3595 1.32269 12
 0 8 0 39.4876 1.76356 30
 0 8 0 36.9895 1.12617 20
 0 8 0 38.6635 1.30321 4
 -1 -8 0 24.173 1.05115 2
 -1 -8 0 22.3812 1.2028 7
 -1 -8 0 24.2091 1.291 7
 -1 -8 0 24.4857 1.18026 9
 -1 -8 0 22.0704 0.99691 14
 -1 -8 0 23.6865 1.04579 4
 -1 -8 0 21.5354 1.5372 31
 -1 -8 0 23.9581 1.09327 10
 -1 -8 0 22.9646 1.01008 12
 1 8 0 23.6478 0.99921 4
 1 8 0 25.9484 1.22978 7
 1 8 0 21.852 0.9773 8
 1 8 0 22.9196 1.16017 7
 1 8 0 22.4215 0.78613 20
 1 8 0 23.2788 1.05546 12
 1 8 0 23.5246 1.54152 30
 1 8 0 23.7544 1.40753 24
 1 8 0 24.0545 1.15902 2
 -2 -8 0 88.3939 2.08262 23
 -2 -8 0 92.5606 2.45351 10
 -2 -8 0 89.2316 2.99975 31
 -2 -8 0 91.0004 2.70303 7
 -2 -8 0 90.3366 2.6577 7
 -2 -8 0 92.9607 2.67939 2
 -2 -8 0 90.0211 2.56798 9
 -2 -8 0 90.7234 2.44877 4
 2 8 0 91.9516 2.15946 17
 2 8 0 93.6915 2.69287 7
 2 8 0 88.2104 2.71496 11
 2 8 0 90.5842 2.73992 24
 2 8 0 90.5039 2.94839 30
 2 8 0 92.4482 3.03279 32
 2 8 0 94.7361 2.43809 4
 2 8 0 93.522 2.65314 7
 2 8 0 90.9907 2.30683 12
 2 8 0 89.8515 2.69289 2
 -3 -8 0 16.8608 1.22992 13
 -3 -8 0 17.5648 1.66377 31
 -3 -8 0 18.0606 1.61507 24
 -3 -8 0 16.5087 1.11871 9
 -3 -8 0 15.0331 0.98304 4
 -3 -8 0 16.1842 1.19824 7
 -3 -8 0 15.4456 1.21298 7
 -3 -8 0 16.3331 0.97686 2
 -3 -8 0 17.3085 1.13565 10
 3 8 0 16.193 0.94187 4
 3 8 0 16.2084 0.93611 26
 3 8 0 16.2256 1.40884 24
 3 8 0 18.0249 1.21165 7
 3 8 0 16.4789 1.62194 30
 3 8 0 15.4791 1.07757 12
 3 8 0 16.9828 1.30322 7
 3 8 0 16.3339 1.6629 32
 3 8 0 15.5208 1.02391 17
 3 8 0 14.58 1.05236 2
 3 8 0 15.3614 1.22729 11
 -4 -8 0 3.12348 0.66118 7
 -4 -8 0 4.3578 0.9933 24
 -4 -8 0 3.24111 0.70748 7
 -4 -8 0 3.76663 0.58066 2
 -4 -8 0 3.6565 0.6462 9
 -4 -8 0 3.44627 0.70488 13
 -4 -8 0 3.25628 0.56454 4
 -4 -8 0 3.22263 1.07645 31
 4 8 0 3.93703 0.72078 17
 4 8 0 3.83297 1.06409 30
 4 8 0 3.44361 0.80064 7
 4 8 0 4.65982 0.66667 12
 4 8 0 2.8177 0.65465 7
 4 8 0 2.77251 0.87757 24
 4 8 0 3.0103 1.05872 32
 4 8 0 2.91844 0.61204 2
 4 8 0 3.85178 0.67878 11
 4 8 0 3.69602 0.56048 15
 -5 -8 0 -0.2025 0.59324 13
 -5 -8 0 -0.9301 0.56953 9
 -5 -8 0 0.4591 0.79423 27
 -5 -8 0 -0.5862 0.70305 7
 -5 -8 0 0.28058 0.50512 2
 -5 -8 0 -0.0717 0.534 4
 -5 -8 0 -0.6691 0.62071 20
 -5 -8 0 0.0887 0.9053 31
 -5 -8 0 -0.0752 0.65794 7
 -5 -8 0 1.40715 1.00482 24
 5 8 0 0.5562 0.66891 7
 5 8 0 1.94941 0.87646 7
 5 8 0 -0.265 0.97679 32
 5 8 0 -1.2996 0.96222 30
 5 8 0 0.69033 0.672 12
 5 8 0 -0.7148 0.47875 5
 5 8 0 -0.8111 0.57368 2
 5 8 0 -0.9526 0.84706 24
 5 8 0 -1.6505 0.5597 11
 -6 -8 0 0.01854 0.96542 27
 -6 -8 0 -0.9063 0.6573 18
 -6 -8 0 0.11876 0.81392 20
 -6 -8 0 -0.5547 1.1795 24
 -6 -8 0 1.89128 0.87615 9
 -6 -8 0 0.3465 0.66262 4
 -6 -8 0 0.84878 0.71959 13
 -6 -8 0 -0.3656 1.07383 31
 -6 -8 0 0.57406 0.88721 7
 -6 -8 0 0.13579 0.897 7
 6 8 0 -1.5972 0.75645 7
 6 8 0 0.42095 1.25745 32
 6 8 0 0.83334 0.81525 12
 6 8 0 0.30061 1.09588 24
 6 8 0 0.1566 1.09994 30
 6 8 0 0.91917 0.78587 11
 6 8 0 0.58694 0.95987 7
 6 8 0 0.7113 0.56407 5
 6 8 0 -0.9366 0.68123 2
 -7 -8 0 2.85437 1.1446 7
 -7 -8 0 -0.8451 1.1433 7
 -7 -8 0 2.33894 1.25112 31
 -7 -8 0 0.12614 0.88215 13
 -7 -8 0 -0.2358 1.4881 24
 -7 -8 0 0.54319 0.79945 4
 -7 -8 0 -0.5381 1.01388 9
 -7 -8 0 1.77506 1.02713 20
 7 8 0 0.40881 1.35779 32
 7 8 0 0.90685 1.26691 30
 7 8 0 -0.3977 0.8649 2
 7 8 0 1.69791 1.01714 7
 7 8 0 1.59227 1.4472 24
 7 8 0 -1.0136 0.96562 11
 7 8 0 -0.0758 1.26732 7
 7 8 0 0.80768 0.97586 12
 7 8 0 -1.5938 0.65585 5
 8 -9 0 7.48556 1.06593 7
 8 -9 0 6.38404 1.37723 7
 8 -9 0 7.13995 0.95856 8
 8 -9 0 9.91247 1.39504 33
 8 -9 0 6.01531 0.93005 12
 8 -9 0 8.26182 1.12076 13
 8 -9 0 8.16134 1.6586 32
 8 -9 0 7.03762 0.71525 22
 -8 9 0 6.93363 0.93171 3
 -8 9 0 8.19616 1.04615 5
 -8 9 0 6.64751 1.02103 10
 -8 9 0 6.60907 0.91072 4
 -8 9 0 9.90772 1.40773 7
 -8 9 0 8.87742 1.2547 11
 -8 9 0 9.8593 1.26989 7
 7 -9 0 0.88448 0.70085 7
 7 -9 0 -1.0803 0.58 12
 7 -9 0 -0.3105 0.66901 8
 7 -9 0 0.60964 1.05569 33
 7 -9 0 0.82963 0.75505 13
 7 -9 0 0.91581 0.83756 19
 7 -9 0 0.22084 0.67554 3
 7 -9 0 0.27981 0.96216 7
 7 -9 0 -0.0509 1.06942 32
 -7 9 0 0.16595 0.73974 10
 -7 9 0 -0.7242 0.57994 3
 -7 9 0 -0.5589 0.50734 4
 -7 9 0 1.12911 0.81545 11
 -7 9 0 0.01581 0.8322 7
 -7 9 0 1.45183 0.87179 7
 -7 9 0 0.43051 0.6968 5
 6 -9 0 2.72766 0.7469 7
 6 -9 0 1.25809 0.81761 33
 6 -9 0 1.64857 0.84911 7
 6 -9 0 1.99039 0.6924 13
 6 -9 0 2.29178 0.63126 3
 6 -9 0 2.19233 0.62581 12
 6 -9 0 1.79344 0.6632 8
 6 -9 0 2.80004 1.04441 32
 6 -9 0 2.27967 0.80602 19
 6 -9 0 1.34646 0.60658 2
 -6 9 0 2.00309 0.76774 7
 -6 9 0 2.86612 0.58744 3
 -6 9 0 1.35477 0.70724 7
 -6 9 0 1.15056 0.66332 10
 -6 9 0 0.86284 0.64847 8
 -6 9 0 1.48601 0.47634 4
 -6 9 0 2.49917 0.6178 5
 5 -9 0 5.02282 1.17014 32
 5 -9 0 4.74039 0.65943 2
 5 -9 0 4.1052 0.78995 7
 5 -9 0 2.92072 0.93218 31
 5 -9 0 4.63524 0.73424 33
 5 -9 0 4.14268 0.65385 12
 5 -9 0 4.24386 0.67485 13
 5 -9 0 4.7901 0.66486 8
 5 -9 0 5.23984 0.78858 7
 5 -9 0 3.92479 0.58376 3
 -5 9 0 4.08029 0.59245 5
 -5 9 0 3.37685 0.7015 7
 -5 9 0 4.11599 0.53566 16
 -5 9 0 4.20753 0.56674 3
 -5 9 0 4.08272 0.79452 7
 -5 9 0 3.56944 0.68805 10
 -5 9 0 3.35363 0.73653 25
 -5 9 0 3.46213 0.67413 8
 -5 9 0 3.00647 0.5459 4
 4 -9 0 0.41089 0.47428 12
 4 -9 0 1.63008 0.58702 7
 4 -9 0 0.17232 0.59098 10
 4 -9 0 0.15273 0.43008 3
 4 -9 0 1.17851 0.68309 7
 4 -9 0 0.25004 0.86727 32
 4 -9 0 0.56599 0.43757 2
 4 -9 0 0.40853 0.4608 8
 4 -9 0 1.48385 0.89842 31
 -4 9 0 -0.2251 0.52845 7
 -4 9 0 1.04147 0.50577 16
 -4 9 0 0.80308 0.55137 25
 -4 9 0 0.28389 0.41896 4
 -4 9 0 0.49045 0.55986 10
 -4 9 0 0.5231 0.49498 8
 -4 9 0 0.94692 0.45299 5
 -4 9 0 1.1792 0.57617 7
 -4 9 0 0.24941 0.85976 30
 3 -9 0 63.3367 1.83245 3
 3 -9 0 64.3134 1.91334 12
 3 -9 0 64.9597 2.108 7
 3 -9 0 62.8712 2.09684 28
 3 -9 0 66.3842 1.81023 8
 3 -9 0 63.8978 2.13565 2
 3 -9 0 62.6565 2.15482 7
 3 -9 0 60.7942 2.52458 31
 3 -9 0 61.8109 2.06397 10
 3 -9 0 62.7094 2.49829 32
 -3 9 0 60.7118 2.47879 30
 -3 9 0 65.0347 1.84934 8
 -3 9 0 60.5155 1.97099 4
 -3 9 0 63.6543 1.90942 5
 -3 9 0 67.7741 2.19346 7
 -3 9 0 61.7508 1.99846 10
 -3 9 0 62.9797 1.64805 14
 -3 9 0 64.7146 1.97578 12
 -3 9 0 65.7402 2.12275 7
 2 -9 0 282.432 6.62329 3
 2 -9 0 300.411 7.44701 2
 2 -9 0 288.208 6.93545 7
 2 -9 0 292.078 6.89866 7
 2 -9 0 288.512 7.18029 31
 2 -9 0 296.005 7.0571 28
 2 -9 0 294.311 6.16296 12
 2 -9 0 279.2 6.61241 10
 -2 9 0 286.709 6.77729 4
 -2 9 0 283.659 6.07819 8
 -2 9 0 284.947 6.16393 12
 -2 9 0 280.52 7.0344 30
 -2 9 0 291.303 6.60128 10
 -2 9 0 290.614 6.89927 7
 -2 9 0 287.199 6.90653 24
 -2 9 0 293.428 6.94328 7
 -2 9 0 290.237 5.96224 22
 1 -9 0 35.1719 1.57221 7
 1 -9 0 31.9265 1.18123 3
 1 -9 0 33.0555 1.40481 10
 1 -9 0 31.2789 1.40657 2
 1 -9 0 32.0595 1.87984 31
 1 -9 0 27.6308 1.31308 12
 1 -9 0 30.0573 0.89705 17
 1 -9 0 32.2548 1.01544 6
 1 -9 0 33.0202 1.47114 7
 -1 9 0 34.8181 1.30477 4
 -1 9 0 33.6167 1.4711 7
 -1 9 0 38.577 1.76583 24
 -1 9 0 31.0429 1.21748 22
 -1 9 0 30.3629 1.37203 12
 -1 9 0 30.2013 1.4826 7
 -1 9 0 33.047 1.84307 30
 -1 9 0 31.6453 1.23862 8
 -1 9 0 32.7921 1.33213 10
 0 -9 0 20.6468 1.30142 7
 0 -9 0 22.652 1.39395 7
 0 -9 0 24.9646 0.94485 14
 0 -9 0 21.5551 1.25899 9
 0 -9 0 24.0378 1.19565 10
 0 -9 0 22.0282 1.12559 12
 0 -9 0 23.1259 1.73264 31
 0 -9 0 21.8037 1.1563 2
 0 -9 0 24.7602 1.15331 4
 0 -9 0 21.9766 0.73285 6
 0 9 0 23.6087 1.1721 12
 0 9 0 21.4704 1.31469 7
 0 9 0 22.8907 1.08014 4
 0 9 0 21.5375 1.29962 7
 0 9 0 23.903 1.50377 24
 0 9 0 20.7128 0.91527 20
 0 9 0 21.9242 1.65478 30
 0 9 0 23.1795 1.05828 8
 -1 -9 0 35.8481 1.42419 10
 -1 -9 0 35.6507 1.58432 7
 -1 -9 0 36.5312 1.45129 2
 -1 -9 0 36.4572 1.97272 31
 -1 -9 0 37.5268 1.54824 9
 -1 -9 0 37.6543 1.4102 4
 -1 -9 0 37.6374 1.68221 7
 -1 -9 0 35.9827 1.28283 14
 1 9 0 35.6522 1.57047 7
 1 9 0 37.4304 1.4125 12
 1 9 0 35.7425 1.52977 2
 1 9 0 36.6358 1.59636 7
 1 9 0 36.1327 1.92825 30
 1 9 0 35.0809 1.77334 24
 1 9 0 37.9231 1.34914 4
 1 9 0 36.5032 1.32448 8
 -2 -9 0 22.7236 1.29301 9
 -2 -9 0 23.2175 1.16322 4
 -2 -9 0 23.9405 0.91899 23
 -2 -9 0 24.7549 1.2661 14
 -2 -9 0 23.064 1.49352 7
 -2 -9 0 23.8109 1.37638 7
 -2 -9 0 22.6663 1.87918 31
 -2 -9 0 23.7595 1.19909 2
 -2 -9 0 24.2473 1.25532 10
 2 9 0 19.792 1.36385 7
 2 9 0 24.9997 1.40382 11
 2 9 0 24.5404 1.57078 24
 2 9 0 22.8327 1.73318 30
 2 9 0 23.8422 1.91064 32
 2 9 0 23.0661 1.35886 7
 2 9 0 24.8605 1.25044 12
 2 9 0 23.3779 1.26944 2
 2 9 0 23.123 1.12433 4
 -3 -9 0 2.19993 0.60561 9
 -3 -9 0 1.09649 0.72804 7
 -3 -9 0 1.05954 0.51103 4
 -3 -9 0 1.88915 1.08838 31
 -3 -9 0 1.22942 0.663 13
 -3 -9 0 0.37101 0.44215 2
 -3 -9 0 1.87506 0.62583 10
 -3 -9 0 2.49023 0.71346 7
 3 9 0 2.59689 0.81327 24
 3 9 0 0.99807 0.48801 4
 3 9 0 1.12287 0.66 7
 3 9 0 1.63445 0.65983 26
 3 9 0 1.6597 0.56878 2
 3 9 0 2.22252 0.63507 12
 3 9 0 0.70341 1.00086 32
 3 9 0 2.05604 0.58099 17
 3 9 0 1.73074 0.59797 11
 3 9 0 1.68598 0.66344 7
 3 9 0 2.51585 1.06154 30
 -4 -9 0 6.06755 1.24394 31
 -4 -9 0 6.58412 0.84197 13
 -4 -9 0 5.99884 0.70385 2
 -4 -9 0 6.22154 0.87075 7
 -4 -9 0 6.44205 0.719 4
 -4 -9 0 6.31373 0.85239 10
 -4 -9 0 6.19764 0.77158 9
 -4 -9 0 7.49471 0.9577 7
 4 9 0 7.51221 0.95687 7
 4 9 0 7.12232 1.08397 24
 4 9 0 7.69202 0.89769 11
 4 9 0 5.35836 0.83423 7
 4 9 0 7.20286 0.85037 17
 4 9 0 6.05275 0.69147 15
 4 9 0 6.64589 0.83728 12
 4 9 0 5.08604 1.23175 30
 4 9 0 5.80022 0.7849 2
 4 9 0 6.00424 1.20331 32
 -5 -9 0 17.3124 1.36606 2
 -5 -9 0 20.4386 1.53487 13
 -5 -9 0 19.0792 1.56491 9
 -5 -9 0 16.6588 1.80186 31
 -5 -9 0 18.7761 1.36092 4
 -5 -9 0 16.161 1.74804 7
 -5 -9 0 17.6374 1.62934 24
 -5 -9 0 18.3655 1.59839 7
 5 9 0 16.8526 1.75155 17
 5 9 0 17.5699 1.40774 5
 5 9 0 18.905 1.55378 12
 5 9 0 20.6258 1.68702 7
 5 9 0 14.5147 1.40476 2
 5 9 0 19.7091 1.87417 7
 5 9 0 14.0028 1.78096 30
 5 9 0 18.8143 2.09262 24
 5 9 0 19.6728 2.14113 32
 5 9 0 18.2804 1.42511 11
 -6 -9 0 -0.5182 1.15175 27
 -6 -9 0 0.23379 0.83632 13
 -6 -9 0 -0.2747 0.8633 20
 -6 -9 0 -0.5163 0.73092 4
 -6 -9 0 -0.2206 1.45246 24
 -6 -9 0 0.1522 0.83815 18
 -6 -9 0 -0.2165 1.21681 31
 -6 -9 0 0.6643 1.00051 7
 -6 -9 0 3.30936 1.03016 9
 -6 -9 0 -0.4419 0.96075 7
 6 9 0 -0.2831 1.11756 7
 6 9 0 0.13023 0.93731 7
 6 9 0 2.07894 0.83084 11
 6 9 0 -0.4569 0.87253 12
 6 9 0 1.20316 1.44738 32
 6 9 0 -2.2184 1.27893 24
 6 9 0 -0.6163 0.69388 5
 6 9 0 -1.5078 0.79854 2
 6 9 0 0.06783 1.24596 30
 6 9 0 0.9728 1.15451 17
 8 -10 0 15.2672 1.5583 33
 8 -10 0 14.932 1.35612 13
 8 -10 0 12.2641 1.33749 2
 8 -10 0 13.9428 1.91204 32
 8 -10 0 14.9139 1.71594 7
 8 -10 0 16.676 1.95576 19
 8 -10 0 15.1305 1.31404 8
 8 -10 0 19.1841 1.95288 7
 -8 10 0 14.9022 1.34103 5
 -8 10 0 13.6562 1.5085 11
 -8 10 0 21.2018 2.20914 7
 -8 10 0 13.9122 1.44585 10
 -8 10 0 14.7136 1.22883 3
 -8 10 0 11.1468 1.12634 4
 -8 10 0 14.3343 1.5464 7
 7 -10 0 5.78954 1.09075 33
 7 -10 0 5.65603 0.9537 13
 7 -10 0 4.5988 0.8903 8
 7 -10 0 6.39882 1.54296 32
 7 -10 0 5.82732 0.79305 12
 7 -10 0 4.46719 1.09442 19
 7 -10 0 4.28557 0.88192 2
 7 -10 0 5.77065 1.05582 7
 7 -10 0 4.52897 0.8681 3
 7 -10 0 5.22751 1.23628 7
 -7 10 0 3.09072 0.9339 10
 -7 10 0 5.18417 1.11917 7
 -7 10 0 4.47056 0.84004 3
 -7 10 0 3.00073 1.05923 11
 -7 10 0 5.07581 0.89086 5
 -7 10 0 3.72934 1.00813 7
 -7 10 0 4.20043 0.6841 4
 6 -10 0 0.31674 0.6315 2
 6 -10 0 0.67235 1.18705 32
 6 -10 0 0.2758 0.64735 3
 6 -10 0 1.05803 0.93331 19
 6 -10 0 1.15538 0.69259 8
 6 -10 0 1.2759 0.72656 7
 6 -10 0 1.08182 0.65663 12
 6 -10 0 1.53138 0.93355 7
 6 -10 0 0.56224 0.76087 13
 -6 10 0 -0.2314 0.71464 8
 -6 10 0 0.73033 0.6245 5
 -6 10 0 1.85927 0.91159 7
 -6 10 0 -0.4039 0.48426 4
 -6 10 0 0.05662 0.90661 25
 -6 10 0 0.7649 0.77061 10
 -6 10 0 0.12653 0.78372 7
 -6 10 0 0.95219 0.59492 3
 5 -10 0 0.64602 0.79258 7
 5 -10 0 0.43145 0.52491 3
 5 -10 0 -0.5017 0.51164 2
 5 -10 0 0.005 0.52833 12
 5 -10 0 -0.1151 0.98735 31
 5 -10 0 0.09253 0.55047 8
 5 -10 0 0.18687 0.58711 7
 5 -10 0 -0.3099 0.63149 13
 5 -10 0 0.37693 1.05762 32
 -5 10 0 -0.0881 0.41772 4
 -5 10 0 -0.433 0.61911 8
 -5 10 0 -0.1243 0.54562 5
 -5 10 0 -0.662 0.70198 25
 -5 10 0 0.89379 0.71615 7
 -5 10 0 -0.6626 0.52621 16
 -5 10 0 0.5372 0.70388 7
 -5 10 0 1.26149 0.68874 10
 4 -10 0 5.86186 0.62555 3
 4 -10 0 5.46947 0.67148 8
 4 -10 0 5.4096 0.67897 2
 4 -10 0 6.7149 0.96604 7
 4 -10 0 5.80998 0.73406 12
 4 -10 0 5.48959 0.83145 10
 4 -10 0 6.54623 1.25611 31
 4 -10 0 4.88652 1.15586 32
 4 -10 0 4.87734 0.73366 7
 -4 10 0 6.13341 0.75301 8
 -4 10 0 8.74992 0.9691 7
 -4 10 0 5.07982 1.07089 30
 -4 10 0 5.88669 0.75954 10
 -4 10 0 6.07125 0.67197 4
 -4 10 0 5.52327 0.5889 14
 -4 10 0 5.3936 0.64497 5
 -4 10 0 4.82384 0.78028 7
 3 -10 0 14.34 1.36184 7
 3 -10 0 16.4085 1.78003 31
 3 -10 0 18.1467 1.11777 2
 3 -10 0 14.6019 1.02545 8
 3 -10 0 15.505 1.14329 12
 3 -10 0 15.394 0.96076 3
 3 -10 0 16.875 1.3132 10
 3 -10 0 15.2655 1.41409 28
 3 -10 0 17.9786 1.75729 32
 3 -10 0 16.1299 1.27407 7
 -3 10 0 16.3934 0.81094 14
 -3 10 0 16.7845 1.15189 8
 -3 10 0 15.9154 1.26605 12
 -3 10 0 14.9267 1.20805 10
 -3 10 0 14.8615 1.27213 7
 -3 10 0 16.3566 1.03905 4
 -3 10 0 15.4617 1.05056 5
 -3 10 0 15.8016 1.68643 30
 -3 10 0 17.397 1.34088 7
 2 -10 0 2.36589 0.65574 7
 2 -10 0 3.7922 0.91677 28
 2 -10 0 2.42049 0.48155 3
 2 -10 0 2.63744 0.60218 12
 2 -10 0 1.22529 0.62646 10
 2 -10 0 2.21161 0.98265 31
 2 -10 0 2.69099 0.44365 17
 2 -10 0 2.56283 0.64888 7
 2 -10 0 3.72104 0.5758 2
 -2 10 0 2.52004 0.58201 8
 -2 10 0 1.67352 0.95272 30
 -2 10 0 3.00886 0.53326 4
 -2 10 0 3.0715 0.71 7
 -2 10 0 2.15279 0.6524 7
 -2 10 0 0.93344 0.73599 24
 -2 10 0 2.62351 0.6539 12
 -2 10 0 3.72345 0.64288 10
 -2 10 0 2.72093 0.50214 22
 1 -10 0 24.4472 1.38531 7
 1 -10 0 22.4466 1.25908 12
 1 -10 0 27.3365 1.37519 9
 1 -10 0 25.1986 1.51162 7
 1 -10 0 24.0721 0.90905 6
 1 -10 0 25.604 1.91543 31
 1 -10 0 23.7933 1.06535 3
 1 -10 0 23.2904 1.33124 10
 1 -10 0 23.9715 1.2493 2
 -1 10 0 24.2053 1.38232 7
 -1 10 0 23.9798 1.17242 22
 -1 10 0 21.8182 1.76332 30
 -1 10 0 24.0062 1.62216 24
 -1 10 0 22.4934 1.31039 12
 -1 10 0 21.6523 1.13298 4
 -1 10 0 21.1666 1.17383 8
 -1 10 0 24.762 1.26286 10
 -1 10 0 22.7595 1.39483 7
 0 -10 0 7.42158 0.82243 9
 0 -10 0 7.92401 0.80033 10
 0 -10 0 8.28656 0.58075 6
 0 -10 0 8.81939 1.00953 4
 0 -10 0 8.00437 1.20065 31
 0 -10 0 8.43394 0.75629 12
 0 -10 0 8.17124 0.8095 7
 0 -10 0 7.13859 0.85989 7
 0 -10 0 7.43006 0.86434 2
 0 10 0 9.45058 0.96358 8
 0 10 0 10.3114 0.96451 7
 0 10 0 8.7026 0.81129 12
 0 10 0 7.25974 0.79878 20
 0 10 0 10.0085 1.0784 24
 0 10 0 7.84185 1.10173 30
 0 10 0 6.27503 0.75409 7
 0 10 0 9.66234 0.90357 4
 -1 -10 0 29.8652 2.00545 31
 -1 -10 0 32.4023 1.27616 14
 -1 -10 0 31.4152 1.43135 2
 -1 -10 0 32.706 1.41585 4
 -1 -10 0 31.1658 1.4915 9
 -1 -10 0 31.4628 1.46175 10
 -1 -10 0 33.7608 1.69717 7
 -1 -10 0 32.8175 1.62042 7
 1 10 0 32.6171 1.59267 7
 1 10 0 33.3346 1.81393 24
 1 10 0 32.9219 2.03757 30
 1 10 0 33.2229 1.34992 4
 1 10 0 32.6403 1.59246 7
 1 10 0 32.2919 1.34634 8
 1 10 0 33.4046 1.46361 12
 -2 -10 0 0.58869 0.72976 7
 -2 -10 0 0.1717 0.62367 7
 -2 -10 0 0.39966 0.54778 9
 -2 -10 0 1.81064 0.9891 31
 -2 -10 0 0.6301 0.63042 14
 -2 -10 0 0.1487 0.5215 4
 -2 -10 0 0.02193 0.44239 23
 -2 -10 0 0.74713 0.61142 10
 -2 -10 0 0.5282 0.47195 2
 2 10 0 -0.0018 0.47917 4
 2 10 0 0.4284 0.95299 30
 2 10 0 0.86013 0.6791 7
 2 10 0 0.48112 1.09661 32
 2 10 0 0.3144 0.55981 2
 2 10 0 -0.6335 0.58089 7
 2 10 0 0.63899 0.73331 24
 2 10 0 0.2424 0.57784 11
 2 10 0 0.69541 0.60012 12
 -3 -10 0 14.7639 1.45417 7
 -3 -10 0 14.6445 1.38483 10
 -3 -10 0 16.0937 1.22142 4
 -3 -10 0 13.5204 1.55582 31
 -3 -10 0 18.2103 1.2953 9
 -3 -10 0 15.4871 1.49599 13
 -3 -10 0 15.1324 1.1442 2
 -3 -10 0 15.372 1.64509 7
 -3 -10 0 17.0053 1.53299 14
 3 10 0 17.3235 1.58037 7
 3 10 0 14.1689 1.136 4
 3 10 0 17.7038 1.39714 12
 3 10 0 14.9603 1.37298 11
 3 10 0 14.3778 1.58934 32
 3 10 0 17.4199 1.94205 30
 3 10 0 16.0932 1.33284 2
 3 10 0 14.2765 1.29683 26
 3 10 0 17.3478 1.11862 17
 3 10 0 15.6951 1.78984 24
 3 10 0 15.6016 1.44463 7
 -4 -10 0 12.0696 1.61846 31
 -4 -10 0 13.758 1.48829 13
 -4 -10 0 13.1827 1.32029 4
 -4 -10 0 11.4319 1.06494 10
 -4 -10 0 14.3739 1.26271 2
 -4 -10 0 13.9588 1.25231 7
 -4 -10 0 12.4773 1.30368 9
 4 10 0 11.8826 1.2868 15
 4 10 0 10.7417 1.37254 24
 4 10 0 12.7687 1.36446 17
 4 10 0 15.5783 1.44696 11
 4 10 0 10.932 1.53088 32
 4 10 0 10.4873 1.35472 2
 4 10 0 11.0687 1.18734 7
 4 10 0 14.1384 1.44269 12
 4 10 0 11.878 1.57597 30
 4 10 0 13.4654 1.54157 7
 -5 -10 0 2.00514 0.82592 4
 -5 -10 0 1.7511 0.97406 7
 -5 -10 0 2.69394 0.85918 13
 -5 -10 0 3.28788 0.84136 2
 -5 -10 0 3.00995 1.35901 31
 -5 -10 0 2.85392 0.88785 9
 -5 -10 0 3.22693 0.9765 10
 -5 -10 0 2.6731 1.08256 7
 5 10 0 3.98812 1.3066 24
 5 10 0 3.1541 1.38809 30
 5 10 0 3.95874 1.08811 7
 5 10 0 2.82938 1.0468 17
 5 10 0 1.78002 0.95392 12
 5 10 0 3.46323 1.18685 7
 5 10 0 3.65756 0.8633 11
 5 10 0 4.06321 1.3944 32
 5 10 0 1.70017 0.82846 5
 5 10 0 3.08388 0.83395 2
 -6 -10 0 -0.2532 1.31257 31
 -6 -10 0 1.90521 1.36256 7
 -6 -10 0 1.0689 1.26085 27
 -6 -10 0 -1.1451 1.14753 7
 -6 -10 0 1.36895 0.91556 4
 -6 -10 0 1.14065 1.16494 9
 6 10 0 1.42102 1.12585 7
 6 10 0 2.02319 1.42515 7
 6 10 0 -0.1513 1.63551 24
 6 10 0 0.98996 1.51308 32
 6 10 0 3.38761 1.02646 5
 6 10 0 1.18071 1.36195 30
 6 10 0 1.96075 0.9598 2
 6 10 0 2.16796 1.14289 12
 6 10 0 1.56862 1.32112 17
 7 -11 0 16.3358 1.57647 12
 7 -11 0 16.846 1.87465 13
 7 -11 0 17.3419 1.80422 8
 7 -11 0 14.1168 1.85645 32
 7 -11 0 14.1062 1.84644 2
 7 -11 0 19.9851 2.11307 19
 7 -11 0 18.503 1.98555 7
 7 -11 0 16.6782 1.68988 3
 7 -11 0 17.7604 1.68547 7
 -7 11 0 15.4944 1.3312 8
 -7 11 0 17.1247 1.61732 7
 -7 11 0 16.8593 1.35127 4
 -7 11 0 17.9028 2.11732 11
 -7 11 0 16.6737 1.68226 5
 -7 11 0 18.8095 1.92496 25
 -7 11 0 19.1982 2.15034 10
 -7 11 0 18.7349 1.66473 3
 -7 11 0 14.5112 1.45134 7
 6 -11 0 1.66853 1.3083 32
 6 -11 0 0.37182 0.73713 2
 6 -11 0 -0.7533 1.11808 7
 6 -11 0 -0.7186 0.78704 7
 6 -11 0 -0.6171 1.05495 19
 6 -11 0 0.39361 0.71112 3
 6 -11 0 0.56066 0.80811 8
 6 -11 0 0.43012 0.71858 12
 6 -11 0 0.41677 0.88632 13
 -6 11 0 0.20799 0.95629 25
 -6 11 0 0.08472 0.62347 16
 -6 11 0 -0.006 0.94002 7
 -6 11 0 -0.1093 0.5996 4
 -6 11 0 1.40296 0.94037 10
 -6 11 0 -0.9981 0.80489 8
 -6 11 0 -0.4368 0.71579 5
 -6 11 0 1.01441 0.89848 7
 5 -11 0 27.3596 1.39755 3
 5 -11 0 26.654 1.67544 13
 5 -11 0 27.3668 1.73426 7
 5 -11 0 26.2745 1.52285 2
 5 -11 0 26.2134 1.51037 8
 5 -11 0 25.1391 2.22004 32
 5 -11 0 27.9632 2.26778 31
 5 -11 0 24.0373 1.98047 7
 5 -11 0 25.7274 1.53269 12
 -5 11 0 25.9288 1.38768 4
 -5 11 0 27.708 1.74145 10
 -5 11 0 25.6959 1.34694 14
 -5 11 0 25.8699 1.43046 16
 -5 11 0 27.6686 1.85783 7
 -5 11 0 27.283 1.86567 7
 -5 11 0 25.5279 1.51279 5
 -5 11 0 25.3857 1.64471 8
 4 -11 0 15.6369 1.36501 7
 4 -11 0 14.4082 1.60563 32
 4 -11 0 14.1517 1.68653 31
 4 -11 0 16.2223 1.53046 28
 4 -11 0 13.6184 1.24574 12
 4 -11 0 17.6214 1.66993 7
 4 -11 0 15.0811 1.1307 3
 4 -11 0 16.2292 1.20222 2
 4 -11 0 15.7166 1.2149 8
 4 -11 0 17.092 1.59064 10
 -4 11 0 17.5538 1.15307 4
 -4 11 0 15.4445 1.57134 7
 -4 11 0 16.1475 1.3945 8
 -4 11 0 16.7224 1.43935 10
 -4 11 0 14.2664 1.48529 7
 -4 11 0 13.4482 1.51817 30
 -4 11 0 13.9164 1.15683 5
 -4 11 0 14.9165 0.97609 14
 3 -11 0 26.5283 1.23804 3
 3 -11 0 22.684 2.07879 31
 3 -11 0 28.3746 1.60699 10
 3 -11 0 26.8941 1.74934 7
 3 -11 0 29.7025 1.47541 12
 3 -11 0 29.0345 1.41436 2
 3 -11 0 26.6493 1.77102 28
 3 -11 0 25.1578 1.5291 7
 -3 11 0 27.1912 1.68624 7
 -3 11 0 28.5414 1.8601 24
 -3 11 0 26.9028 1.43961 8
 -3 11 0 28.0649 1.64387 7
 -3 11 0 26.973 1.37179 5
 -3 11 0 27.4681 1.60216 12
 -3 11 0 27.1492 1.31018 4
 -3 11 0 24.4963 1.96578 30
 -3 11 0 26.8709 1.51211 10
 2 -11 0 14.0804 1.33998 10
 2 -11 0 16.217 1.06454 2
 2 -11 0 13.8106 1.21314 12
 2 -11 0 16.013 1.78438 28
 2 -11 0 15.0582 1.01503 3
 2 -11 0 13.7895 0.92923 6
 2 -11 0 14.3011 1.4794 7
 2 -11 0 13.3991 1.23906 7
 2 -11 0 12.0788 1.45478 31
 2 -11 0 13.1398 0.71002 17
 -2 11 0 14.3918 0.99884 22
 -2 11 0 17.5389 1.58996 24
 -2 11 0 13.6729 1.30324 12
 -2 11 0 14.2502 1.18652 8
 -2 11 0 12.3561 1.50303 30
 -2 11 0 14.5611 1.26075 10
 -2 11 0 13.0952 1.05882 4
 -2 11 0 11.7677 1.08332 7
 -2 11 0 14.2793 1.36121 7
 1 -11 0 27.9578 1.39987 12
 1 -11 0 26.6667 2.12095 31
 1 -11 0 27.5435 1.72311 7
 1 -11 0 28.7464 1.20767 3
 1 -11 0 25.5118 1.46004 9
 1 -11 0 28.4287 1.01775 6
 1 -11 0 28.7587 1.51632 10
 1 -11 0 23.6304 1.51397 7
 1 -11 0 29.8809 1.35306 2
 -1 11 0 25.6391 1.29542 4
 -1 11 0 28.9545 1.50202 12
 -1 11 0 27.4594 1.62787 7
 -1 11 0 29.0595 1.71347 24
 -1 11 0 27.7781 1.34797 8
 -1 11 0 28.1939 2.00163 30
 -1 11 0 29.0662 1.5318 7
 -1 11 0 27.2663 1.35852 22
 0 -11 0 8.36595 0.89065 9
 0 -11 0 9.38362 0.88954 10
 0 -11 0 9.656 0.89489 12
 0 -11 0 9.60855 1.07968 7
 0 -11 0 10.3159 1.46975 31
 0 -11 0 11.1639 1.20293 7
 0 -11 0 9.61903 0.96803 3
 0 -11 0 10.5669 0.95348 2
 0 11 0 10.1154 0.86587 20
 0 11 0 10.2659 1.02007 4
 0 11 0 10.3107 0.93367 12
 0 11 0 10.991 1.19827 7
 0 11 0 12.0276 1.39753 7
 0 11 0 11.0004 1.36759 30
 0 11 0 9.53905 0.80325 8
 0 11 0 12.9661 1.43422 24
 -1 -11 0 40.3159 1.47564 14
 -1 -11 0 38.2946 1.67002 10
 -1 -11 0 41.6039 1.85986 7
 -1 -11 0 36.4461 1.95629 7
 -1 -11 0 36.2447 2.30448 31
 -1 -11 0 38.3781 1.70366 9
 -1 -11 0 39.688 1.69372 2
 -1 -11 0 38.9154 1.67183 4
 1 11 0 44.101 1.8369 7
 1 11 0 38.1469 2.24619 30
 1 11 0 42.5935 2.10446 24
 1 11 0 39.0798 1.56862 4
 1 11 0 35.8736 1.55585 8
 1 11 0 38.0167 1.70113 12
 1 11 0 43.8294 1.9398 11
 1 11 0 39.6467 1.90541 7
 -2 -11 0 25.5976 1.80387 7
 -2 -11 0 22.3425 2.15265 31
 -2 -11 0 25.6517 1.47137 2
 -2 -11 0 23.8593 1.48853 10
 -2 -11 0 21.2652 1.60499 7
 -2 -11 0 23.2944 1.4255 4
 -2 -11 0 25.3646 1.46645 14
 -2 -11 0 21.0086 1.46628 9
 2 11 0 25.275 1.8745 24
 2 11 0 25.8863 1.62353 7
 2 11 0 25.3714 1.51751 12
 2 11 0 23.3661 1.42227 8
 2 11 0 24.6336 2.23986 32
 2 11 0 23.0645 1.37575 4
 2 11 0 25.074 1.75323 7
 2 11 0 22.2673 1.50447 11
 2 11 0 21.4087 2.02765 30
 -3 -11 0 11.4586 1.32057 4
 -3 -11 0 14.4671 1.33254 9
 -3 -11 0 9.28536 1.1622 2
 -3 -11 0 11.7826 1.06682 10
 -3 -11 0 9.67732 1.54463 31
 -3 -11 0 10.4971 1.12931 13
 -3 -11 0 9.03111 1.0469 7
 -3 -11 0 11.5543 1.12415 14
 -3 -11 0 10.0506 1.27629 7
 3 11 0 12.1064 1.70858 32
 3 11 0 11.4921 1.4424 2
 3 11 0 7.71554 1.35881 30
 3 11 0 10.1868 1.24357 7
 3 11 0 10.3137 0.9102 4
 3 11 0 11.2729 1.39041 24
 3 11 0 10.8411 1.16899 11
 3 11 0 10.6111 1.05218 12
 3 11 0 9.81731 1.02428 26
 3 11 0 9.84826 1.05202 7
 -4 -11 0 5.50586 1.19241 14
 -4 -11 0 5.97116 0.9061 4
 -4 -11 0 4.27207 0.97938 13
 -4 -11 0 5.07434 1.01744 10
 -4 -11 0 5.63869 1.12196 7
 -4 -11 0 5.71995 0.86567 9
 -4 -11 0 5.91919 0.9048 2
 -4 -11 0 4.64742 1.22004 7
 -4 -11 0 4.86049 1.35427 31
 4 11 0 6.27639 1.07531 7
 4 11 0 4.58585 1.47412 32
 4 11 0 6.83589 0.99896 15
 4 11 0 7.06511 0.94587 2
 4 11 0 7.20004 1.53604 30
 4 11 0 7.4112 1.09487 12
 4 11 0 8.37022 1.053 11
 4 11 0 6.77757 0.94049 17
 4 11 0 4.0843 1.35695 24
 4 11 0 7.47224 1.26579 7
 -5 -11 0 0.87234 1.16335 10
 -5 -11 0 -1.7994 0.87646 4
 -5 -11 0 -0.4179 0.87161 2
 -5 -11 0 0.4494 1.45152 31
 -5 -11 0 -0.2329 0.93919 9
 -5 -11 0 2.36653 1.36507 7
 -5 -11 0 -2.0143 1.09734 7
 -5 -11 0 2.20769 1.01612 13
 5 11 0 0.25786 0.94644 2
 5 11 0 1.75232 1.53589 24
 5 11 0 -0.3942 1.41677 30
 5 11 0 1.22252 0.99578 5
 5 11 0 -0.642 1.0418 12
 5 11 0 -0.308 1.25695 7
 5 11 0 -1.6758 1.11224 7
 5 11 0 -0.076 1.22771 32
 5 11 0 0.47098 1.09051 17
 6 -12 0 3.45623 0.94471 2
 6 -12 0 5.59996 1.11434 13
 6 -12 0 4.51537 1.38618 7
 6 -12 0 4.23987 0.86769 3
 6 -12 0 4.0654 0.87606 12
 6 -12 0 5.02285 1.00244 8
 6 -12 0 2.56443 1.43881 32
 6 -12 0 2.75153 1.02205 7
 6 -12 0 4.42206 1.4571 31
 6 -12 0 4.03931 1.41257 19
 -6 12 0 4.01922 1.11774 10
 -6 12 0 4.5605 0.82635 16
 -6 12 0 3.28607 0.69483 4
 -6 12 0 2.58372 1.03224 8
 -6 12 0 3.94446 0.93267 14
 -6 12 0 5.60597 1.30753 7
 -6 12 0 1.5559 1.24773 7
 -6 12 0 3.03673 0.9191 5
 5 -12 0 28.4558 2.34318 7
 5 -12 0 27.947 1.93673 13
 5 -12 0 27.8003 2.45732 31
 5 -12 0 27.8577 1.76334 12
 5 -12 0 29.0704 2.49103 32
 5 -12 0 29.2026 1.7264 8
 5 -12 0 30.2883 1.69864 2
 5 -12 0 28.7294 1.56964 3
 5 -12 0 28.9395 1.90468 7
 -5 12 0 27.2521 1.35456 14
 -5 12 0 26.8908 2.11049 7
 -5 12 0 28.5007 1.83572 8
 -5 12 0 29.0013 1.73532 5
 -5 12 0 29.4784 1.74129 16
 -5 12 0 28.2054 1.97056 10
 -5 12 0 30.3402 2.20221 7
 -5 12 0 31.7192 1.56886 4
 4 -12 0 60.4473 2.25163 2
 4 -12 0 60.8318 2.36583 7
 4 -12 0 56.0546 2.24713 12
 4 -12 0 61.6738 2.43903 28
 4 -12 0 56.9334 2.00503 3
 4 -12 0 60.1353 2.45756 10
 4 -12 0 52.7972 2.92666 31
 4 -12 0 58.745 2.95425 32
 4 -12 0 60.6716 2.69567 7
 -4 12 0 57.5703 2.201 8
 -4 12 0 55.9719 2.86418 30
 -4 12 0 60.3178 2.11111 4
 -4 12 0 56.9952 2.48817 7
 -4 12 0 58.0458 2.68787 24
 -4 12 0 61.1138 2.58054 7
 -4 12 0 58.3525 2.10806 5
 -4 12 0 61.2213 2.38263 10
 3 -12 0 19.2079 1.03921 17
 3 -12 0 21.8625 1.66219 10
 3 -12 0 20.29 1.9473 28
 3 -12 0 17.2008 1.55675 7
 3 -12 0 21.263 1.88174 7
 3 -12 0 20.6012 1.24272 3
 3 -12 0 15.4411 1.65792 31
 3 -12 0 20.8279 1.53509 12
 3 -12 0 22.232 1.37567 2
 -3 12 0 19.0322 2.03862 30
 -3 12 0 15.7804 1.7628 24
 -3 12 0 18.1004 1.26973 4
 -3 12 0 20.1815 1.66556 7
 -3 12 0 19.369 1.71604 7
 -3 12 0 18.2421 1.47785 8
 -3 12 0 19.318 1.39605 5
 -3 12 0 20.5029 1.66151 12
 -3 12 0 19.2694 1.56701 10
 2 -12 0 1.90658 0.76518 9
 2 -12 0 1.73432 0.98142 7
 2 -12 0 2.75133 0.78192 12
 2 -12 0 2.3144 0.58178 3
 2 -12 0 1.62163 0.50697 2
 2 -12 0 2.45635 1.15076 28
 2 -12 0 1.39361 0.78455 10
 2 -12 0 1.47062 1.18836 31
 2 -12 0 1.84833 0.65251 6
 2 -12 0 1.0719 0.76454 7
 -2 12 0 0.08393 0.98117 30
 -2 12 0 0.63295 0.7677 24
 -2 12 0 1.28572 0.7435 10
 -2 12 0 1.44557 0.82688 7
 -2 12 0 2.01805 0.64053 22
 -2 12 0 1.45884 0.76965 12
 -2 12 0 1.77436 0.60769 4
 -2 12 0 2.79035 0.75096 8
 -2 12 0 1.65905 0.80244 7
 1 -12 0 1.29398 0.72419 7
 1 -12 0 -0.6735 0.87966 7
 1 -12 0 -1.362 0.60368 9
 1 -12 0 -0.2577 0.49541 2
 1 -12 0 0.08122 0.51998 3
 1 -12 0 0.18511 0.49203 6
 1 -12 0 -0.8218 0.65788 12
 1 -12 0 0.22542 1.12611 31
 1 -12 0 -0.0301 0.71919 10
 -1 12 0 0.65216 0.62783 20
 -1 12 0 0.94607 0.77938 7
 -1 12 0 -1.0132 0.72926 12
 -1 12 0 0.02046 0.66529 8
 -1 12 0 -0.6268 0.51699 4
 -1 12 0 0.6193 1.07115 30
 -1 12 0 0.44348 0.69589 22
 -1 12 0 -0.2943 0.70186 24
 -1 12 0 0.67064 0.69432 7
 0 -12 0 13.9727 1.42252 12
 0 -12 0 13.4797 1.43432 10
 0 -12 0 15.3521 1.13543 2
 0 -12 0 12.2734 1.60865 31
 0 -12 0 15.2239 1.44573 7
 0 -12 0 12.1551 1.26902 9
 0 -12 0 16.8595 1.71197 7
 0 -12 0 12.675 1.11461 3
 0 12 0 15.5895 1.70285 24
 0 12 0 13.3084 1.11402 22
 0 12 0 17.2445 1.67057 7
 0 12 0 12.7273 1.40325 7
 0 12 0 12.313 0.94181 20
 0 12 0 13.7141 1.2079 4
 0 12 0 14.7479 1.70089 30
 0 12 0 14.8136 1.31004 8
 0 12 0 13.2833 1.09792 12
 -1 -12 0 28.1344 1.98661 7
 -1 -12 0 28.6748 1.62513 4
 -1 -12 0 29.2211 1.71508 10
 -1 -12 0 27.7722 1.4066 23
 -1 -12 0 25.6652 2.28427 31
 -1 -12 0 28.7725 1.77094 7
 -1 -12 0 26.2602 1.37943 14
 -1 -12 0 29.2936 1.62561 2
 -1 -12 0 24.2462 1.52395 9
 1 12 0 26.7202 1.51713 8
 1 12 0 28.4965 1.93657 7
 1 12 0 30.632 1.76695 11
 1 12 0 33.0964 2.08626 24
 1 12 0 27.7112 1.50958 4
 1 12 0 27.6168 1.74778 7
 1 12 0 25.4653 2.19812 30
 1 12 0 33.1848 1.72941 12
 -2 -12 0 12.0551 1.6543 31
 -2 -12 0 16.5524 1.44566 2
 -2 -12 0 13.2435 1.44324 14
 -2 -12 0 15.0991 1.46722 9
 -2 -12 0 14.183 1.47538 4
 -2 -12 0 12.0858 1.3942 7
 -2 -12 0 14.5073 1.73392 7
 -2 -12 0 13.2607 1.54918 10
 2 12 0 16.7226 1.53418 8
 2 12 0 11.7318 1.14464 7
 2 12 0 18.0861 1.86101 7
 2 12 0 14.2447 1.88025 32
 2 12 0 15.8551 1.84866 30
 2 12 0 13.9227 1.27393 11
 2 12 0 12.3333 1.13777 12
 2 12 0 18.4789 1.99508 24
 2 12 0 15.9837 1.44634 4
 -3 -12 0 9.98908 1.05848 4
 -3 -12 0 10.1023 1.2792 13
 -3 -12 0 10.0993 1.42885 7
 -3 -12 0 10.2961 1.04554 9
 -3 -12 0 10.8363 1.28262 7
 -3 -12 0 8.39905 1.58274 31
 -3 -12 0 9.53772 1.05462 2
 -3 -12 0 12.5164 1.21945 14
 -3 -12 0 10.0422 1.14281 10
 3 12 0 9.06744 1.03192 4
 3 12 0 11.964 1.51287 24
 3 12 0 11.9142 1.7656 30
 3 12 0 9.93241 1.31192 7
 3 12 0 10.2447 1.13104 26
 3 12 0 10.4128 1.21318 7
 3 12 0 10.6082 1.15382 12
 3 12 0 6.52905 0.99086 11
 3 12 0 9.07272 1.65601 32
 3 12 0 9.688 1.08979 8
 -4 -12 0 2.25396 1.16156 10
 -4 -12 0 2.03061 0.97629 4
 -4 -12 0 -1.489 1.35924 7
 -4 -12 0 1.66879 0.98349 2
 -4 -12 0 0.30223 0.9949 13
 -4 -12 0 2.5902 0.94371 9
 -4 -12 0 2.45327 1.21593 7
 -4 -12 0 3.65589 1.61792 31
 -4 -12 0 2.05921 1.25166 14
 4 12 0 2.22333 0.96271 2
 4 12 0 2.62658 1.38874 7
 4 12 0 0.67168 1.07921 15
 4 12 0 1.14035 1.5442 24
 4 12 0 2.4186 1.46674 32
 4 12 0 3.58823 1.12786 7
 4 12 0 1.14432 1.13355 12
 4 12 0 0.24078 1.2072 30
 5 -13 0 16.9343 1.46747 12
 5 -13 0 14.8307 1.36032 7
 5 -13 0 18.6269 1.80852 7
 5 -13 0 18.0166 1.45242 13
 5 -13 0 19.6809 1.49588 2
 5 -13 0 19.3899 1.87392 8
 5 -13 0 16.447 2.05266 32
 5 -13 0 16.9524 1.56953 3
 5 -13 0 14.4071 2.00401 31
 -5 13 0 19.1819 1.9939 8
 -5 13 0 23.4705 2.22114 7
 -5 13 0 13.7577 1.54593 7
 -5 13 0 16.0572 1.43694 4
 -5 13 0 18.0525 1.34916 16
 -5 13 0 17.5934 1.75709 5
 -5 13 0 17.426 1.86482 24
 -5 13 0 18.7825 2.18792 10
 4 -13 0 28.3358 2.22905 28
 4 -13 0 24.4059 1.39898 17
 4 -13 0 25.6305 2.17052 10
 4 -13 0 30.3208 2.57523 31
 4 -13 0 25.6434 1.93689 12
 4 -13 0 25.2997 1.58548 2
 4 -13 0 25.6861 2.43023 7
 4 -13 0 28.485 1.9318 7
 4 -13 0 24.6733 1.54435 3
 -4 13 0 25.0945 2.01537 10
 -4 13 0 22.8408 2.36046 30
 -4 13 0 25.4485 2.30131 24
 -4 13 0 23.0489 1.54291 4
 -4 13 0 22.5303 2.08603 7
 -4 13 0 26.3834 2.24423 7
 -4 13 0 25.2245 1.895 8
 -4 13 0 22.7676 1.65944 5
 3 -13 0 7.54516 1.10236 10
 3 -13 0 5.01526 1.31358 7
 3 -13 0 5.891 1.58395 31
 3 -13 0 8.33084 1.12015 7
 3 -13 0 6.74037 1.09518 12
 3 -13 0 7.9454 0.8773 6
 3 -13 0 9.16716 1.46594 28
 3 -13 0 6.93531 0.8283 3
 3 -13 0 8.4443 0.88923 2
 -3 13 0 8.04376 1.10839 10
 -3 13 0 6.09366 0.98871 8
 -3 13 0 6.19479 0.9398 5
 -3 13 0 5.08507 1.34784 30
 -3 13 0 6.52203 0.81908 4
 -3 13 0 7.90196 1.17426 7
 -3 13 0 4.95079 1.06972 24
 -3 13 0 5.83041 1.10903 7
 2 -13 0 -2.3015 0.77997 7
 2 -13 0 -0.2293 0.83094 9
 2 -13 0 0.44034 0.63208 3
 2 -13 0 0.32725 1.10698 7
 2 -13 0 -1.4183 0.88658 10
 2 -13 0 0.01201 0.62863 6
 2 -13 0 0.7705 1.12706 31
 2 -13 0 0.05195 0.85338 12
 2 -13 0 1.36923 1.35574 28
 2 -13 0 1.42722 0.56796 2
 -2 13 0 -1.1518 0.93968 24
 -2 13 0 -0.4907 1.29477 30
 -2 13 0 -0.0951 0.62337 4
 -2 13 0 1.01611 0.9628 7
 -2 13 0 1.10769 0.82591 8
 -2 13 0 0.34385 0.85927 12
 -2 13 0 -0.5684 0.86484 7
 1 -13 0 -0.3749 1.15857 31
 1 -13 0 0.07976 0.86514 9
 1 -13 0 0.38253 0.76854 7
 1 -13 0 0.80694 0.5793 6
 1 -13 0 0.43938 1.03961 7
 1 -13 0 0.2122 0.82 12
 1 -13 0 0.49452 0.86413 10
 1 -13 0 1.01473 0.58439 2
 1 -13 0 0.45454 0.63474 3
 -1 13 0 -0.1818 0.87129 12
 -1 13 0 0.12743 0.79661 22
 -1 13 0 -0.7728 0.71444 20
 -1 13 0 0.04227 0.87325 7
 -1 13 0 -0.7514 0.90756 24
 -1 13 0 0.32303 0.78751 8
 -1 13 0 0.55376 0.65706 4
 -1 13 0 -2.111 1.28354 30
 -1 13 0 -1.0298 0.82548 7
 0 -13 0 1.99702 0.77709 9
 0 -13 0 1.61367 1.09187 7
 0 -13 0 1.22526 0.9175 10
 0 -13 0 0.85086 0.62504 2
 0 -13 0 1.83408 0.6862 3
 0 -13 0 1.74213 0.86102 12
 0 -13 0 1.7267 0.92261 7
 0 -13 0 2.57907 1.30059 31
 0 13 0 2.32904 1.37264 30
 0 13 0 0.75765 0.89792 12
 0 13 0 1.73228 0.84507 8
 0 13 0 2.05273 0.92807 7
 0 13 0 2.07505 1.01448 24
 0 13 0 3.54776 1.07231 7
 0 13 0 2.45689 0.75921 4
 0 13 0 2.89164 0.58987 20
 0 13 0 1.53259 0.96605 22
 -1 -13 0 24.4506 1.914 7
 -1 -13 0 23.8038 1.86883 10
 -1 -13 0 25.6576 1.7443 2
 -1 -13 0 20.3069 1.49049 23
 -1 -13 0 25.1842 2.45339 31
 -1 -13 0 24.9007 1.6794 9
 -1 -13 0 21.9121 2.24729 7
 1 13 0 22.8502 1.94982 7
 1 13 0 22.9987 2.30235 30
 1 13 0 24.4015 1.67985 4
 1 13 0 22.0242 2.19006 7
 1 13 0 22.7068 1.82456 12
 1 13 0 25.7376 1.98103 11
 1 13 0 23.0366 1.67247 8
 1 13 0 27.6954 2.3144 24
 -2 -13 0 34.6639 2.7523 31
 -2 -13 0 39.6431 2.37644 7
 -2 -13 0 38.8676 2.04617 2
 -2 -13 0 39.1261 1.92541 14
 -2 -13 0 38.7555 2.74922 7
 -2 -13 0 31.7543 2.56281 13
 -2 -13 0 36.8923 2.12149 10
 -2 -13 0 38.5725 2.07533 4
 -2 -13 0 36.3481 1.99903 9
 2 13 0 36.7703 2.01921 8
 2 13 0 39.511 2.53157 7
 2 13 0 34.8772 2.86416 32
 2 13 0 37.0679 2.68845 30
 2 13 0 43.3443 2.68227 24
 2 13 0 35.4613 2.11068 11
 2 13 0 34.2308 2.26852 7
 2 13 0 38.2354 2.11933 12
 2 13 0 37.5575 2.05995 4
 -3 -13 0 1.72001 1.15358 14
 -3 -13 0 0.85941 0.99214 4
 -3 -13 0 1.56338 1.17626 10
 -3 -13 0 1.13855 1.11817 7
 -3 -13 0 1.92706 1.52662 7
 -3 -13 0 3.82897 1.52551 13
 -3 -13 0 1.77381 0.94188 2
 3 13 0 0.76812 1.00327 4
 3 13 0 1.7345 1.12744 7
 3 13 0 2.1675 1.5897 24
 3 13 0 0.94709 1.50911 32
 3 13 0 1.27415 1.40062 7
 3 13 0 0.49101 1.13086 12
 4 -14 0 24.9389 2.55453 28
 4 -14 0 18.3936 1.60598 12
 4 -14 0 15.5183 1.76184 7
 4 -14 0 21.5904 2.17189 7
 4 -14 0 17.6043 1.62586 3
 4 -14 0 16.1935 2.03244 31
 4 -14 0 18.9998 1.22289 17
 -4 14 0 20.9196 2.3919 10
 -4 14 0 23.0636 2.54395 7
 -4 14 0 20.0757 2.08903 8
 -4 14 0 21.5096 2.5017 7
 -4 14 0 19.8721 1.91299 5
 3 -14 0 6.92234 1.6906 28
 3 -14 0 8.13386 1.31045 10
 3 -14 0 6.47357 0.92413 3
 3 -14 0 8.76442 1.30172 12
 3 -14 0 6.75614 0.92217 2
 3 -14 0 9.96265 1.02052 6
 3 -14 0 8.31045 1.33932 9
 3 -14 0 5.59584 1.68698 31
 3 -14 0 6.277 1.61272 7
 3 -14 0 6.50161 1.17944 7
 -3 14 0 8.58243 1.3871 7
 -3 14 0 7.9495 1.23269 7
 -3 14 0 6.61309 1.20848 10
 -3 14 0 8.689 1.1717 8
 -3 14 0 6.61409 1.38869 24
 -3 14 0 7.7375 1.01241 4
 -3 14 0 7.05376 1.64375 30
 -3 14 0 7.52738 1.09404 5
 2 -14 0 1.54847 0.72538 6
 2 -14 0 1.80581 1.34512 7
 2 -14 0 1.35467 1.43987 31
 2 -14 0 1.45273 0.75205 3
 2 -14 0 0.18995 1.02038 7
 2 -14 0 -0.926 0.96835 12
 2 -14 0 1.36297 0.70175 2
 2 -14 0 -0.422 1.02998 10
 2 -14 0 1.32567 1.08103 9
 2 -14 0 0.70517 1.66656 28
 -2 14 0 1.254 1.43596 30
 -2 14 0 0.60622 0.96523 20
 -2 14 0 1.28687 1.2111 7
 -2 14 0 0.4761 0.98363 8
 -2 14 0 2.07945 1.01781 7
 -2 14 0 0.19679 1.12399 24
 -2 14 0 1.71722 1.1206 12
 -2 14 0 1.9081 0.85158 4
 1 -14 0 4.4591 1.36896 7
 1 -14 0 4.94913 1.12304 9
 1 -14 0 3.44026 1.12754 10
 1 -14 0 3.1077 1.49436 31
 1 -14 0 2.99863 1.10224 12
 1 -14 0 4.96137 0.84448 3
 1 -14 0 3.7469 1.01872 7
 1 -14 0 3.29387 0.75306 2
 -1 14 0 5.20692 1.19893 7
 -1 14 0 4.34607 0.86805 20
 -1 14 0 3.15141 1.15611 12
 -1 14 0 4.25996 1.01466 8
 -1 14 0 5.25455 1.25588 24
 -1 14 0 4.36558 1.5367 30
 -1 14 0 4.55115 1.06193 7
 -1 14 0 3.8192 1.02486 22
 -1 14 0 3.98245 0.9038 4
 0 -14 0 15.8453 1.64839 7
 0 -14 0 14.3968 1.39169 10
 0 -14 0 13.7234 1.27547 9
 0 -14 0 13.7108 1.87832 31
 0 -14 0 15.3919 1.64337 2
 0 -14 0 13.2742 1.37248 7
 0 -14 0 14.6395 1.52064 3
 0 14 0 18.268 1.449 22
 0 14 0 16.0446 1.29206 8
 0 14 0 15.1254 1.61644 11
 0 14 0 14.2517 1.53229 7
 0 14 0 16.176 1.61981 24
 0 14 0 15.7175 1.41886 12
 0 14 0 15.078 1.92134 30
 0 14 0 18.9247 2.09603 7
 0 14 0 15.1798 1.69117 4
 -1 -14 0 4.33493 0.97309 3
 -1 -14 0 2.84326 1.59127 31
 -1 -14 0 4.58776 0.9318 23
 -1 -14 0 4.82436 1.20874 10
 -1 -14 0 3.6151 1.01771 2
 -1 -14 0 5.40087 1.23068 7
 -1 -14 0 3.20748 1.45083 7
 1 14 0 5.15925 1.22394 12
 1 14 0 4.7472 1.22053 7
 1 14 0 4.17126 1.49417 30
 1 14 0 4.70343 1.47084 7
 1 14 0 2.63153 0.9947 4
 1 14 0 5.0555 1.13463 8
 1 14 0 4.37927 1.43245 22
 1 14 -1 23.1841 2.69433 7
 1 14 -1 19.5194 1.82615 8
 1 14 -1 15.7246 1.46564 12
 1 14 -1 15.5947 1.38027 4
 1 14 -1 14.0552 1.99047 30
 1 14 -1 16.7892 1.67732 22
 1 14 -1 18.6119 1.98619 7
 1 14 -1 12.2772 1.61409 11
 -1 -14 1 17.6124 1.32922 23
 -1 -14 1 14.9674 1.81063 7
 -1 -14 1 14.3016 2.05617 31
 -1 -14 1 19.3272 1.93656 2
 -1 -14 1 14.0185 1.50132 7
 -1 -14 1 16.1502 1.52271 10
 -1 -14 1 17.1991 1.7682 3
 0 14 -1 3.65869 0.96138 4
 0 14 -1 4.03339 1.0758 7
 0 14 -1 1.3033 1.47514 30
 0 14 -1 2.234 1.3593 7
 0 14 -1 5.39431 1.38882 11
 0 14 -1 5.23772 1.27686 22
 0 14 -1 4.58041 1.02798 8
 0 14 -1 5.92682 1.29337 24
 0 14 -1 1.88115 1.11438 12
 0 -14 1 3.308 1.50845 31
 0 -14 1 2.64965 0.89842 9
 0 -14 1 2.10837 0.8619 2
 0 -14 1 4.72065 1.16972 7
 0 -14 1 4.84897 0.93695 3
 0 -14 1 4.73139 1.20587 10
 0 -14 1 3.41368 1.38706 7
 -1 14 -1 0.40914 0.93957 8
 -1 14 -1 0.12115 0.95741 7
 -1 14 -1 0.39089 1.06142 12
 -1 14 -1 -0.8382 1.09207 24
 -1 14 -1 2.4665 1.40817 30
 -1 14 -1 0.85545 1.30622 7
 -1 14 -1 2.05008 1.04144 22
 -1 14 -1 2.04515 0.89043 4
 1 -14 1 0.11979 0.74116 2
 1 -14 1 -0.4268 1.19346 7
 1 -14 1 -0.0591 0.80377 3
 1 -14 1 1.16204 1.05729 10
 1 -14 1 -0.5331 1.34648 31
 1 -14 1 0.07857 1.00033 12
 1 -14 1 -0.2612 0.98601 7
 1 -14 1 -1.4557 0.8232 9
 -2 14 -1 15.7186 1.2672 8
 -2 14 -1 12.2435 1.47461 24
 -2 14 -1 15.7368 1.7081 7
 -2 14 -1 14.0261 1.57249 4
 -2 14 -1 12.8716 1.83609 30
 -2 14 -1 16.6804 1.84327 7
 2 -14 1 17.1344 1.76783 7
 2 -14 1 17.6481 1.4494 2
 2 -14 1 14.5747 1.42237 10
 2 -14 1 18.7984 1.97781 28
 2 -14 1 14.5572 1.57215 3
 2 -14 1 17.8633 2.08865 7
 2 -14 1 14.8013 2.0019 31
 2 -14 1 13.1605 1.37141 9
 2 -14 1 16.8285 1.26788 6
 2 -14 1 15.7308 1.39021 12
 -3 14 -1 10.0651 1.1986 8
 -3 14 -1 10.8053 1.32877 7
 -3 14 -1 6.20826 1.02991 4
 -3 14 -1 9.54132 1.76778 30
 -3 14 -1 10.3117 1.34876 10
 -3 14 -1 13.4087 1.6258 7
 -3 14 -1 9.1856 1.12908 5
 -3 14 -1 5.59772 1.19328 24
 3 -14 1 8.53339 1.32242 7
 3 -14 1 9.69947 1.71913 31
 3 -14 1 4.60805 1.29042 7
 3 -14 1 11.1361 1.00367 6
 3 -14 1 8.10772 1.26568 12
 3 -14 1 10.6396 1.66067 28
 3 -14 1 8.89761 1.29415 10
 3 -14 1 10.8659 1.05914 3
 3 -14 1 13.3841 1.39387 2
 -4 14 -1 3.12049 1.13994 8
 -4 14 -1 1.60303 0.97011 5
 -4 14 -1 0.82661 1.23392 10
 -4 14 -1 2.51859 1.50847 7
 -4 14 -1 3.34745 1.27779 7
 4 -14 1 1.1337 1.23601 12
 4 -14 1 0.1582 0.90843 3
 4 -14 1 1.86636 1.28212 10
 4 -14 1 3.13707 1.55894 7
 4 -14 1 -0.4769 1.15321 7
 3 13 -1 16.0621 1.71383 7
 3 13 -1 17.8823 1.95545 24
 3 13 -1 19.9885 1.99401 12
 3 13 -1 22.5538 2.09033 7
 3 13 -1 19.0321 2.13866 32
 3 13 -1 19.4277 1.97179 4
 -3 -13 1 19.9435 2.21908 10
 -3 -13 1 19.4965 1.74045 7
 -3 -13 1 20.675 1.93552 14
 -3 -13 1 20.9084 1.86781 2
 -3 -13 1 17.5759 1.78925 7
 -3 -13 1 21.1439 2.01554 4
 2 13 -1 32.8038 1.94227 4
 2 13 -1 27.2582 2.40219 7
 2 13 -1 29.1683 1.7912 8
 2 13 -1 27.2817 1.94163 12
 2 13 -1 29.8504 2.14772 11
 2 13 -1 29.2415 2.69134 32
 2 13 -1 31.3051 2.05507 7
 2 13 -1 30.6196 2.46419 24
 2 13 -1 32.3704 2.21979 26
 2 13 -1 30.149 2.56369 30
 -2 -13 1 31.5212 2.64257 31
 -2 -13 1 28.1997 1.56429 23
 -2 -13 1 28.0881 1.95257 4
 -2 -13 1 30.0855 2.29002 7
 -2 -13 1 30.8059 2.15395 10
 -2 -13 1 26.5208 1.76088 9
 -2 -13 1 27.9562 2.50645 7
 -2 -13 1 29.9524 1.65258 14
 -2 -13 1 31.135 1.97157 2
 1 13 -1 15.2333 1.23422 12
 1 13 -1 12.3034 1.30414 11
 1 13 -1 14.9224 1.50408 8
 1 13 -1 11.8613 1.32705 24
 1 13 -1 14.9693 1.7557 7
 1 13 -1 15.5944 1.8664 30
 1 13 -1 17.9385 1.65101 7
 1 13 -1 18.0859 1.50451 22
 1 13 -1 12.2268 1.48411 4
 -1 -13 1 12.8817 1.45378 9
 -1 -13 1 14.1652 1.61319 4
 -1 -13 1 17.7572 1.8816 10
 -1 -13 1 17.727 1.89973 7
 -1 -13 1 14.8887 1.60986 23
 -1 -13 1 13.8287 1.56 2
 -1 -13 1 13.7597 1.87293 31
 -1 -13 1 14.3918 1.53579 7
 0 13 -1 5.4505 1.01495 12
 0 13 -1 7.55015 0.92089 4
 0 13 -1 6.81733 1.52943 30
 0 13 -1 10.6884 1.28345 11
 0 13 -1 7.53611 0.98001 7
 0 13 -1 10.3833 1.24321 24
 0 13 -1 8.86452 1.16774 22
 0 13 -1 6.14434 1.26063 7
 0 13 -1 8.67296 0.94226 8
 0 -13 1 7.54451 0.84777 3
 0 -13 1 9.96852 1.23002 7
 0 -13 1 9.15438 1.05808 12
 0 -13 1 8.93673 1.30154 7
 0 -13 1 7.19935 0.93044 9
 0 -13 1 8.46667 1.10331 10
 0 -13 1 7.70663 0.94174 2
 0 -13 1 7.19592 1.49378 31
 -1 13 -1 14.9891 1.36944 4
 -1 13 -1 16.8714 1.62558 22
 -1 13 -1 14.3107 1.10757 20
 -1 13 -1 14.7884 1.40664 24
 -1 13 -1 12.0177 1.62511 30
 -1 13 -1 15.3025 1.41347 8
 -1 13 -1 16.8003 1.668 12
 -1 13 -1 15.7117 1.30364 7
 -1 13 -1 16.6056 1.93081 7
 1 -13 1 16.7102 1.5544 9
 1 -13 1 14.8324 1.27488 10
 1 -13 1 17.2001 1.91003 7
 1 -13 1 13.7232 1.76252 31
 1 -13 1 15.485 1.60115 12
 1 -13 1 18.7182 1.38674 3
 1 -13 1 14.7002 1.7159 7
 1 -13 1 19.0058 1.39856 2
 -2 13 -1 7.95508 1.54692 30
 -2 13 -1 10.1417 1.1521 12
 -2 13 -1 11.3506 1.33727 7
 -2 13 -1 7.8702 0.8346 4
 -2 13 -1 9.2458 0.98841 8
 -2 13 -1 8.13614 1.13289 24
 -2 13 -1 8.83272 1.07593 7
 2 -13 1 8.9334 1.61883 31
 2 -13 1 8.38183 1.16015 10
 2 -13 1 11.6719 0.84438 6
 2 -13 1 10.9609 1.3788 7
 2 -13 1 9.85286 1.19835 2
 2 -13 1 10.3419 1.14633 12
 2 -13 1 10.7255 1.16956 7
 2 -13 1 10.06 0.92744 3
 2 -13 1 14.6617 1.59161 28
 -3 13 -1 6.30268 1.14381 7
 -3 13 -1 5.32596 0.89766 5
 -3 13 -1 3.35288 1.08843 24
 -3 13 -1 7.67562 1.15529 10
 -3 13 -1 4.0881 1.37096 30
 -3 13 -1 4.9618 0.80882 4
 -3 13 -1 6.68102 0.97773 8
 -3 13 -1 7.10675 1.26488 7
 3 -13 1 10.2678 1.17842 2
 3 -13 1 5.56687 1.04772 10
 3 -13 1 6.31143 1.0621 12
 3 -13 1 6.02153 1.32167 28
 3 -13 1 2.12971 1.36773 31
 3 -13 1 6.31908 1.04069 7
 3 -13 1 6.54516 0.83967 3
 3 -13 1 3.17894 1.02706 7
 3 -13 1 6.93769 0.72849 17
 -4 13 -1 -0.4604 0.99405 7
 -4 13 -1 1.07241 0.98774 10
 -4 13 -1 -1.2607 0.55776 4
 -4 13 -1 2.00769 0.92855 8
 -4 13 -1 0.74328 1.23402 24
 -4 13 -1 0.78175 0.79561 5
 -4 13 -1 -0.0093 1.02715 16
 -4 13 -1 1.08125 1.28977 30
 -4 13 -1 -0.0539 1.08108 7
 4 -13 1 1.16274 0.68867 2
 4 -13 1 0.3096 1.08461 28
 4 -13 1 -0.8451 0.74257 3
 4 -13 1 -0.5806 0.80973 17
 4 -13 1 0.0791 0.97768 12
 4 -13 1 0.90836 1.20074 7
 4 -13 1 -1.7046 0.97533 10
 4 -13 1 0.03285 1.34461 31
 4 -13 1 1.8031 0.91971 7
 -5 13 -1 -1.254 0.56094 4
 -5 13 -1 0.59187 1.03818 16
 -5 13 -1 -1.6923 1.49788 24
 -5 13 -1 0.2985 1.04215 7
 -5 13 -1 0.24799 0.87057 5
 -5 13 -1 -0.8462 1.26915 7
 -5 13 -1 -0.7743 1.12065 10
 -5 13 -1 -0.0437 0.989 8
 5 -13 1 1.10835 1.33481 32
 5 -13 1 1.57943 0.70595 2
 5 -13 1 -1.2971 0.94477 8
 5 -13 1 -1.5851 1.39898 31
 5 -13 1 -0.2767 0.81877 3
 5 -13 1 -0.385 1.01899 12
 5 -13 1 -0.7895 1.33337 7
 5 -13 1 -0.1008 1.13574 7
 5 -13 1 -0.5446 1.14884 13
 4 12 -1 15.0595 1.92599 32
 4 12 -1 16.767 1.34772 12
 4 12 -1 21.0472 2.06034 24
 4 12 -1 14.704 1.75445 7
 4 12 -1 14.8842 1.92555 30
 4 12 -1 20.3154 2.06515 7
 4 12 -1 17.6064 1.73675 15
 4 12 -1 14.8814 1.44821 5
 -4 -12 1 20.7051 2.15377 13
 -4 -12 1 15.6676 1.84208 4
 -4 -12 1 15.9427 1.64464 7
 -4 -12 1 15.9489 1.67246 7
 -4 -12 1 17.4533 1.50972 10
 -4 -12 1 19.1095 1.86323 2
 -4 -12 1 21.3962 2.20683 14
 -4 -12 1 18.5223 1.87819 9
 -4 -12 1 19.6741 2.19045 31
 3 12 -1 30.8632 1.8165 8
 3 12 -1 37.3242 2.09448 11
 3 12 -1 30.717 2.56829 24
 3 12 -1 31.031 1.78821 26
 3 12 -1 30.6639 2.415 7
 3 12 -1 29.3754 1.80593 4
 3 12 -1 33.5375 2.04555 7
 3 12 -1 29.9321 1.83295 12
 3 12 -1 28.8584 2.53796 30
 3 12 -1 28.1973 2.57288 32
 -3 -12 1 31.6955 2.63538 31
 -3 -12 1 32.9206 1.81717 9
 -3 -12 1 25.6006 2.34426 7
 -3 -12 1 28.4164 2.1836 7
 -3 -12 1 30.7773 2.12888 13
 -3 -12 1 30.1412 1.89387 14
 -3 -12 1 31.6673 1.82157 2
 -3 -12 1 30.0907 2.07089 10
 -3 -12 1 32.6821 1.87442 4
 2 12 -1 6.37004 1.0018 7
 2 12 -1 4.28663 1.31066 30
 2 12 -1 5.94933 0.85339 4
 2 12 -1 4.51769 0.85101 8
 2 12 -1 5.80558 1.04984 7
 2 12 -1 5.13122 1.00305 11
 2 12 -1 5.84725 1.14507 24
 2 12 -1 4.24112 1.32457 32
 2 12 -1 5.48178 0.92041 12
 -2 -12 1 6.68187 0.81465 23
 -2 -12 1 6.22475 1.37188 31
 -2 -12 1 6.48914 0.83484 14
 -2 -12 1 4.11673 0.81112 2
 -2 -12 1 5.52911 1.0915 7
 -2 -12 1 3.82062 0.76775 9
 -2 -12 1 3.57246 1.04593 7
 -2 -12 1 4.7961 0.97176 10
 -2 -12 1 6.08983 0.93565 4
 1 12 -1 3.05738 0.71057 4
 1 12 -1 2.21833 0.71809 8
 1 12 -1 2.63919 1.00701 7
 1 12 -1 2.3393 0.7742 7
 1 12 -1 2.7571 0.78097 11
 1 12 -1 2.60872 1.21894 30
 1 12 -1 1.83474 0.79598 12
 1 12 -1 4.37191 0.93709 24
 -1 -12 1 2.3773 0.74594 4
 -1 -12 1 3.59949 0.88784 7
 -1 -12 1 1.98457 0.82028 10
 -1 -12 1 2.20716 1.21065 31
 -1 -12 1 2.18205 0.70129 2
 -1 -12 1 2.32911 0.69376 9
 -1 -12 1 2.65527 0.90141 7
 -1 -12 1 2.69944 0.79685 23
 0 12 -1 12.6188 1.20336 7
 0 12 -1 11.8053 1.01956 12
 0 12 -1 12.1461 1.23973 24
 0 12 -1 10.8442 0.87191 8
 0 12 -1 10.7011 1.07353 22
 0 12 -1 9.29071 0.95804 7
 0 12 -1 10.1748 1.17331 4
 0 12 -1 8.17523 1.31393 30
 0 -12 1 9.77349 1.09152 3
 0 -12 1 8.90294 1.10853 2
 0 -12 1 9.7087 0.9215 12
 0 -12 1 9.0419 1.39415 31
 0 -12 1 10.1986 0.93269 9
 0 -12 1 10.6508 1.07382 7
 0 -12 1 10.7807 1.02552 10
 0 -12 1 9.64326 1.03869 7
 0 -12 1 9.31232 0.89798 4
 -1 12 -1 5.31841 1.20788 30
 -1 12 -1 6.41966 0.86291 7
 -1 12 -1 6.41144 0.95004 24
 -1 12 -1 8.04912 0.94965 12
 -1 12 -1 7.32155 0.98574 7
 -1 12 -1 8.36995 0.82418 8
 -1 12 -1 8.66933 0.9015 22
 -1 12 -1 7.96057 0.70579 20
 -1 12 -1 6.08649 0.70457 4
 1 -12 1 6.05414 1.34934 31
 1 -12 1 6.84514 0.9894 7
 1 -12 1 7.57198 0.88602 12
 1 -12 1 8.24886 0.77451 6
 1 -12 1 7.85165 0.78018 3
 1 -12 1 7.35696 0.91772 9
 1 -12 1 9.3172 1.10633 7
 1 -12 1 8.12154 1.06156 2
 1 -12 1 6.37161 0.94168 10
 -2 12 -1 23.5853 1.7994 24
 -2 12 -1 29.3069 1.92953 7
 -2 12 -1 29.4036 1.42773 22
 -2 12 -1 29.0561 1.69145 12
 -2 12 -1 27.2147 1.47063 8
 -2 12 -1 25.1378 1.38564 4
 -2 12 -1 26.0746 1.66233 10
 -2 12 -1 20.5232 2.03491 30
 -2 12 -1 28.4923 1.67745 7
 2 -12 1 23.3057 2.21852 31
 2 -12 1 24.8743 1.07394 17
 2 -12 1 27.4982 1.39062 3
 2 -12 1 28.9189 1.7594 7
 2 -12 1 27.5519 1.18334 6
 2 -12 1 27.5177 1.71314 10
 2 -12 1 26.6755 1.88805 7
 2 -12 1 27.704 1.42444 2
 2 -12 1 25.5324 1.58386 12
 2 -12 1 28.84 2.12885 28
 -3 12 -1 8.26487 1.00984 10
 -3 12 -1 10.1334 0.9257 8
 -3 12 -1 10.3175 1.1964 5
 -3 12 -1 7.36907 0.77425 4
 -3 12 -1 9.64341 1.24092 24
 -3 12 -1 14.4117 1.66458 7
 -3 12 -1 7.15586 0.97529 7
 -3 12 -1 8.93405 1.45903 30
 3 -12 1 9.60737 1.04502 7
 3 -12 1 10.3239 1.57764 31
 3 -12 1 9.97823 0.98335 12
 3 -12 1 10.0981 1.23842 7
 3 -12 1 9.87681 1.00935 2
 3 -12 1 8.74202 1.21117 28
 3 -12 1 9.99307 1.15812 3
 3 -12 1 9.08914 1.08881 10
 3 -12 1 9.52588 0.7955 17
 -4 12 -1 4.24596 0.84124 8
 -4 12 -1 2.84519 1.14658 30
 -4 12 -1 3.3602 1.22145 24
 -4 12 -1 1.87118 0.51024 4
 -4 12 -1 3.05916 0.73525 5
 -4 12 -1 3.05832 0.93434 16
 -4 12 -1 3.32807 0.93709 7
 -4 12 -1 3.69007 0.90204 10
 -4 12 -1 3.46923 1.07481 7
 4 -12 1 2.91497 0.67956 2
 4 -12 1 2.83189 0.89765 7
 4 -12 1 3.16823 0.90591 12
 4 -12 1 2.91592 1.33916 32
 4 -12 1 2.20807 1.18964 31
 4 -12 1 3.54542 1.07128 7
 4 -12 1 2.83688 0.97275 10
 4 -12 1 3.15311 0.96762 28
 4 -12 1 2.57877 0.72902 3
 -5 12 -1 5.46228 1.13581 7
 -5 12 -1 6.30277 0.98138 16
 -5 12 -1 4.73205 0.67598 4
 -5 12 -1 5.42649 1.40826 24
 -5 12 -1 5.98425 1.22766 7
 -5 12 -1 7.53577 1.11665 10
 -5 12 -1 5.47904 0.57259 14
 -5 12 -1 5.16959 0.98345 8
 -5 12 -1 6.09217 0.86654 5
 5 -12 1 5.13192 0.84126 3
 5 -12 1 6.63849 1.10946 7
 5 -12 1 4.87683 1.34526 31
 5 -12 1 5.95578 1.23579 7
 5 -12 1 5.51487 1.48464 32
 5 -12 1 4.99585 0.77453 2
 5 -12 1 5.88111 1.03415 12
 5 -12 1 5.85417 0.9338 8
 5 -12 1 5.35842 1.0888 13
 -6 12 -1 16.9605 1.41275 14
 -6 12 -1 19.1621 1.86944 8
 -6 12 -1 20.5879 1.58259 5
 -6 12 -1 19.6231 2.15934 7
 -6 12 -1 18.0822 1.54243 16
 -6 12 -1 19.3418 1.79213 25
 -6 12 -1 17.3579 1.49705 10
 -6 12 -1 14.9674 1.59287 7
 -6 12 -1 21.5109 1.50662 4
 6 -12 1 19.7964 1.83277 12
 6 -12 1 21.2941 2.39733 7
 6 -12 1 16.2519 2.02378 32
 6 -12 1 17.8297 1.58077 2
 6 -12 1 15.6523 2.01517 31
 6 -12 1 18.0211 1.66831 3
 6 -12 1 19.6467 2.04711 13
 6 -12 1 15.9396 1.54184 7
 6 -12 1 17.555 1.76916 8
 5 11 -1 3.3491 1.24366 17
 5 11 -1 2.10596 1.00337 2
 5 11 -1 2.66242 1.57967 24
 5 11 -1 0.66986 1.3375 7
 5 11 -1 1.74839 1.40307 32
 5 11 -1 1.01665 1.41381 30
 5 11 -1 3.28372 1.10832 12
 5 11 -1 1.75526 1.05547 5
 5 11 -1 2.11688 1.08128 7
 -5 -11 1 -0.0493 1.25523 7
 -5 -11 1 1.85091 0.99237 9
 -5 -11 1 1.68075 1.132 10
 -5 -11 1 2.4231 0.94968 2
 -5 -11 1 1.23296 0.97118 4
 -5 -11 1 4.39529 1.27544 7
 -5 -11 1 0.15849 1.34369 31
 4 11 -1 14.8903 1.68347 24
 4 11 -1 22.8315 2.24226 7
 4 11 -1 12.5454 1.76949 32
 4 11 -1 15.9794 1.74132 7
 4 11 -1 13.7813 1.60092 11
 4 11 -1 18.2765 1.67232 2
 4 11 -1 16.3265 1.19969 12
 4 11 -1 12.9737 1.68662 30
 4 11 -1 19.0516 1.62318 17
 4 11 -1 15.7939 1.444 15
 -4 -11 1 15.9602 1.54821 2
 -4 -11 1 18.5175 1.80306 13
 -4 -11 1 14.7211 1.85121 31
 -4 -11 1 17.2551 1.88385 10
 -4 -11 1 19.3578 1.98076 7
 -4 -11 1 15.0032 1.677 9
 -4 -11 1 16.9136 1.51547 7
 -4 -11 1 13.0754 1.584 4
 3 11 -1 23.8871 1.64985 7
 3 11 -1 21.4166 1.47211 26
 3 11 -1 22.0336 1.44437 4
 3 11 -1 30.0033 2.15486 24
 3 11 -1 21.6571 2.24905 32
 3 11 -1 22.7889 1.54564 12
 3 11 -1 23.7475 1.65707 11
 3 11 -1 18.7061 2.10895 30
 3 11 -1 25.923 2.04866 7
 -3 -11 1 26.7795 1.92849 7
 -3 -11 1 23.558 1.69505 10
 -3 -11 1 17.6992 1.48295 4
 -3 -11 1 25.8636 1.49425 2
 -3 -11 1 23.6267 1.80253 7
 -3 -11 1 24.1154 1.516 9
 -3 -11 1 21.0988 2.3928 31
 -3 -11 1 23.9871 1.67378 14
 2 11 -1 8.09707 1.30826 30
 2 11 -1 13.6172 1.32192 24
 2 11 -1 9.19626 1.47592 32
 2 11 -1 12.4329 0.9824 12
 2 11 -1 12.4421 1.38097 7
 2 11 -1 13.9658 1.35713 11
 2 11 -1 13.5645 1.21047 8
 2 11 -1 14.1157 1.24031 4
 2 11 -1 9.4749 1.06659 7
 -2 -11 1 11.3784 1.04608 10
 -2 -11 1 11.5899 1.26286 4
 -2 -11 1 11.687 1.14436 7
 -2 -11 1 12.2118 1.23886 2
 -2 -11 1 11.6188 1.17933 9
 -2 -11 1 12.1791 1.10714 23
 -2 -11 1 11.4442 1.5533 31
 -2 -11 1 11.6491 1.22495 14
 -2 -11 1 14.3211 1.50691 7
 1 11 -1 0.08661 0.69567 7
 1 11 -1 0.05462 1.01541 30
 1 11 -1 0.02061 0.64192 12
 1 11 -1 -0.1474 0.58942 7
 1 11 -1 -0.8511 0.75591 24
 1 11 -1 -0.0012 0.55842 8
 1 11 -1 0.11664 0.50097 4
 1 11 -1 0.76089 0.67356 11
 -1 -11 1 0.86394 0.96826 31
 -1 -11 1 -0.4394 0.47857 2
 -1 -11 1 0.51399 0.72222 7
 -1 -11 1 0.22522 0.58725 4
 -1 -11 1 -0.1118 0.57156 9
 -1 -11 1 -0.008 0.50931 14
 -1 -11 1 0.34032 0.75404 7
 -1 -11 1 -0.1175 0.64654 10
 0 11 -1 26.3887 1.70488 24
 0 11 -1 28.3916 1.70509 7
 0 11 -1 26.3073 1.47102 7
 0 11 -1 23.8064 1.98881 30
 0 11 -1 24.2058 1.53509 22
 0 11 -1 25.9598 1.30975 4
 0 11 -1 25.5344 1.25547 8
 0 11 -1 23.2953 1.3976 12
 0 -11 1 27.3502 1.37007 12
 0 -11 1 27.0106 1.48959 9
 0 -11 1 27.413 1.54976 10
 0 -11 1 22.5721 1.50923 7
 0 -11 1 26.9108 2.14725 31
 0 -11 1 24.4082 1.26124 3
 0 -11 1 24.566 1.63824 7
 0 -11 1 26.0269 1.39959 4
 0 -11 1 26.0109 1.35422 2
 -1 11 -1 4.82682 0.90405 24
 -1 11 -1 3.99525 0.72416 22
 -1 11 -1 5.23111 0.64364 8
 -1 11 -1 3.97742 0.59987 4
 -1 11 -1 4.4342 0.88827 7
 -1 11 -1 4.32462 0.71804 7
 -1 11 -1 3.41091 1.18042 30
 -1 11 -1 4.65026 0.77779 12
 1 -11 1 5.64316 0.80962 10
 1 -11 1 2.56295 0.82773 7
 1 -11 1 4.61185 0.48998 6
 1 -11 1 4.48292 1.19852 31
 1 -11 1 4.21209 0.70811 12
 1 -11 1 3.41125 0.80048 7
 1 -11 1 4.26199 0.61882 2
 1 -11 1 4.57542 0.59499 3
 -2 11 -1 7.30894 0.92995 7
 -2 11 -1 6.02917 1.22344 30
 -2 11 -1 6.54095 0.89048 7
 -2 11 -1 6.65666 0.94158 24
 -2 11 -1 7.59119 0.73945 22
 -2 11 -1 5.76755 0.6239 4
 -2 11 -1 7.43848 0.84864 10
 -2 11 -1 7.63891 0.76553 8
 -2 11 -1 7.64876 0.90842 12
 2 -11 1 8.07835 0.83387 12
 2 -11 1 9.38823 0.96856 7
 2 -11 1 5.25105 1.15325 31
 2 -11 1 6.82617 0.90343 7
 2 -11 1 8.05697 0.94894 3
 2 -11 1 7.71056 0.82213 17
 2 -11 1 7.69929 0.8326 10
 2 -11 1 7.07155 0.87612 2
 -3 11 -1 5.78123 1.24969 30
 -3 11 -1 6.58051 0.93029 7
 -3 11 -1 6.50166 1.04498 24
 -3 11 -1 5.39199 0.73824 8
 -3 11 -1 6.32513 0.82181 10
 -3 11 -1 6.00409 0.69341 5
 -3 11 -1 4.53939 0.60669 4
 -3 11 -1 6.41898 0.86765 7
 3 -11 1 5.60114 0.98183 28
 3 -11 1 6.28518 0.86274 10
 3 -11 1 5.29458 0.67727 2
 3 -11 1 4.43436 0.76193 7
 3 -11 1 5.34282 1.00372 7
 3 -11 1 6.14983 0.6884 3
 3 -11 1 5.19802 0.80296 12
 3 -11 1 5.43958 1.27498 31
 -4 11 -1 1.12655 0.8295 7
 -4 11 -1 0.44629 0.76087 7
 -4 11 -1 0.54836 0.68738 10
 -4 11 -1 1.13401 0.57567 5
 -4 11 -1 0.5107 0.72969 16
 -4 11 -1 1.13595 0.50177 4
 -4 11 -1 1.17004 1.00722 30
 -4 11 -1 2.43392 1.03574 24
 -4 11 -1 2.33933 0.7133 8
 4 -11 1 1.86647 0.80332 7
 4 -11 1 2.44962 1.21381 32
 4 -11 1 1.06606 0.53601 2
 4 -11 1 2.30952 1.04823 31
 4 -11 1 0.8606 0.58561 3
 4 -11 1 2.31513 0.76057 28
 4 -11 1 1.52562 0.63504 12
 4 -11 1 0.35843 0.75689 10
 4 -11 1 0.93952 0.67764 7
 4 -11 1 1.24842 0.62592 8
 -5 11 -1 14.3896 1.34976 25
 -5 11 -1 13.5632 1.62464 7
 -5 11 -1 12.7417 1.18872 5
 -5 11 -1 12.218 1.03178 14
 -5 11 -1 13.5836 1.34324 16
 -5 11 -1 13.6842 1.42428 8
 -5 11 -1 13.8288 1.52102 10
 -5 11 -1 14.471 1.61055 7
 -5 11 -1 16.0869 1.18744 4
 5 -11 1 13.3202 1.5096 7
 5 -11 1 10.873 0.99339 12
 5 -11 1 9.10111 1.42161 31
 5 -11 1 12.5934 1.24291 3
 5 -11 1 11.9191 1.26752 7
 5 -11 1 11.8499 1.15791 2
 5 -11 1 12.2251 1.59376 32
 5 -11 1 11.5794 1.10007 13
 5 -11 1 12.5184 1.28972 8
 -6 11 -1 25.8026 2.08558 7
 -6 11 -1 23.2124 1.86951 10
 -6 11 -1 23.9825 1.39298 16
 -6 11 -1 22.1341 1.45863 4
 -6 11 -1 29.4844 1.92863 7
 -6 11 -1 26.9116 1.54417 5
 -6 11 -1 25.2773 1.72188 8
 -6 11 -1 27.2272 1.70638 25
 6 -11 1 23.0063 2.07104 19
 6 -11 1 26.8848 1.6776 8
 6 -11 1 26.3416 1.89315 13
 6 -11 1 21.7098 1.55218 2
 6 -11 1 21.8263 2.34126 32
 6 -11 1 22.8559 1.89359 7
 6 -11 1 20.6975 1.55968 3
 6 -11 1 24.9545 1.63441 12
 6 -11 1 25.7231 2.18769 7
 -7 11 -1 34.8172 2.35991 7
 -7 11 -1 38.3702 2.23231 25
 -7 11 -1 44.3905 2.10737 3
 -7 11 -1 39.8622 1.84532 4
 -7 11 -1 38.9124 2.33139 11
 -7 11 -1 41.8192 2.34793 10
 -7 11 -1 43.2216 2.03673 5
 -7 11 -1 42.6597 2.6149 7
 7 -11 1 41.1398 2.75464 7
 7 -11 1 43.3361 2.79409 32
 7 -11 1 42.0995 2.52537 7
 7 -11 1 40.416 2.10727 3
 7 -11 1 45.3874 2.17509 8
 7 -11 1 40.9706 2.36665 19
 7 -11 1 36.8311 2.25703 13
 7 -11 1 39.6019 1.99956 12
 7 -11 1 37.9146 2.12865 2
 6 10 -1 1.75993 1.34509 17
 6 10 -1 0.0658 1.07951 7
 6 10 -1 -0.3497 1.06121 12
 6 10 -1 1.00108 1.61113 24
 6 10 -1 2.21088 0.97015 5
 6 10 -1 -1.9323 1.4436 32
 6 10 -1 0.65928 0.92817 2
 6 10 -1 2.49352 1.47503 30
 6 10 -1 1.54105 1.46903 7
 -6 -10 1 1.40948 1.67245 24
 -6 -10 1 -2.3581 1.17601 7
 -6 -10 1 -1.6637 1.10299 9
 -6 -10 1 0.03014 0.92396 4
 -6 -10 1 -1.1914 1.30984 31
 -6 -10 1 0.9374 1.2394 27
 -6 -10 1 -0.1206 1.1311 7
 5 10 -1 9.81355 1.53036 30
 5 10 -1 15.3964 1.32969 17
 5 10 -1 13.0767 1.61263 24
 5 10 -1 12.6079 1.27961 7
 5 10 -1 13.2753 1.4398 7
 5 10 -1 16.2382 1.58044 12
 5 10 -1 14.0204 1.48981 11
 5 10 -1 15.4382 1.57893 2
 5 10 -1 13.1906 1.70576 32
 5 10 -1 14.0744 1.66196 5
 -5 -10 1 15.4345 1.49763 7
 -5 -10 1 16.383 1.47569 2
 -5 -10 1 13.0958 1.8007 31
 -5 -10 1 16.6073 1.85438 10
 -5 -10 1 10.7736 1.11814 13
 -5 -10 1 11.8644 1.19731 9
 -5 -10 1 15.0125 1.43264 7
 -5 -10 1 17.9996 1.56284 4
 -5 -10 1 10.9762 1.68391 24
 4 10 -1 47.149 2.37443 7
 4 10 -1 47.2713 1.94038 17
 4 10 -1 46.2883 2.68333 32
 4 10 -1 50.5591 2.09255 2
 4 10 -1 49.1986 2.12221 11
 4 10 -1 45.163 1.66865 15
 4 10 -1 47.2439 2.56344 24
 4 10 -1 44.529 2.6145 30
 4 10 -1 49.1798 2.14516 7
 4 10 -1 50.798 1.89949 12
 -4 -10 1 47.1372 1.97149 4
 -4 -10 1 52.7789 2.343 7
 -4 -10 1 45.3932 2.00883 9
 -4 -10 1 47.9375 1.9708 2
 -4 -10 1 48.5252 2.11383 13
 -4 -10 1 48.0412 2.29464 7
 -4 -10 1 47.6901 2.76863 31
 -4 -10 1 49.3583 2.16918 10
 3 10 -1 19.5716 1.42933 11
 3 10 -1 20.5641 1.27515 17
 3 10 -1 18.3945 1.91797 30
 3 10 -1 19.4682 1.72303 24
 3 10 -1 19.5901 1.40094 2
 3 10 -1 19.8939 1.32896 12
 3 10 -1 18.7077 1.23312 4
 3 10 -1 18.2037 1.39154 7
 3 10 -1 15.7802 1.23949 26
 3 10 -1 19.3321 1.65341 7
 3 10 -1 15.7221 1.70131 32
 -3 -10 1 21.0659 2.12322 31
 -3 -10 1 18.8689 1.5874 7
 -3 -10 1 17.4977 1.3282 4
 -3 -10 1 18.4393 1.57193 7
 -3 -10 1 20.6997 1.34786 9
 -3 -10 1 20.0825 1.28544 2
 -3 -10 1 17.6964 1.46543 10
 2 10 -1 -0.5559 1.0364 32
 2 10 -1 0.11985 0.54997 11
 2 10 -1 -0.5529 0.48176 4
 2 10 -1 0.85184 0.60305 12
 2 10 -1 0.41775 0.52606 8
 2 10 -1 0.37631 0.88547 30
 2 10 -1 0.63069 0.57595 7
 2 10 -1 -0.3529 0.62523 7
 2 10 -1 1.32196 0.71404 24
 -2 -10 1 -0.0591 0.53167 4
 -2 -10 1 0.12307 0.63947 10
 -2 -10 1 -0.0441 0.92962 31
 -2 -10 1 0.26066 0.60267 14
 -2 -10 1 0.46456 0.51777 2
 -2 -10 1 0.02966 0.50529 9
 -2 -10 1 0.66263 0.56387 23
 -2 -10 1 0.35498 0.69283 7
 -2 -10 1 0.27489 0.69404 7
 1 10 -1 3.67742 1.0532 30
 1 10 -1 4.69614 0.67449 12
 1 10 -1 5.29082 0.91316 24
 1 10 -1 4.83708 0.76811 7
 1 10 -1 4.16656 0.58742 4
 1 10 -1 4.51913 0.75169 7
 1 10 -1 3.98633 0.60416 8
 1 10 -1 4.83102 0.76043 11
 -1 -10 1 4.0401 0.71583 7
 -1 -10 1 4.7923 0.74308 9
 -1 -10 1 5.04575 0.81656 7
 -1 -10 1 4.31725 0.99453 31
 -1 -10 1 4.36863 0.72902 10
 -1 -10 1 4.09729 0.63842 4
 -1 -10 1 4.6133 0.57048 14
 -1 -10 1 4.69277 0.56995 2
 0 10 -1 67.5338 1.83763 8
 0 10 -1 68.2636 2.04427 4
 0 10 -1 65.2526 2.59449 30
 0 10 -1 63.3235 2.30332 7
 0 10 -1 64.8507 1.59618 20
 0 10 -1 68.5389 2.07947 22
 0 10 -1 68.0044 2.43636 24
 0 10 -1 64.0493 1.96299 12
 0 10 -1 66.9612 2.20506 7
 0 -10 1 65.2197 2.08443 4
 0 -10 1 66.3751 1.92388 12
 0 -10 1 67.9446 2.20793 2
 0 -10 1 63.3741 2.27768 7
 0 -10 1 63.8598 2.2744 7
 0 -10 1 62.6596 2.66483 31
 0 -10 1 65.1326 2.18591 9
 0 -10 1 65.6535 2.11592 10
 -1 10 -1 161.431 4.02346 10
 -1 10 -1 162.01 4.07055 4
 -1 10 -1 159.876 4.26853 7
 -1 10 -1 161.245 4.33682 24
 -1 10 -1 164.582 3.73373 22
 -1 10 -1 161.756 4.53887 30
 -1 10 -1 162.777 4.19852 7
 -1 10 -1 159.893 3.75478 12
 -1 10 -1 163.246 3.62843 8
 1 -10 1 164.776 4.30796 7
 1 -10 1 152.786 3.4724 17
 1 -10 1 158.903 4.25935 7
 1 -10 1 160.512 3.96882 3
 1 -10 1 159.96 3.72263 12
 1 -10 1 165.241 4.0563 10
 1 -10 1 162.727 3.40846 6
 1 -10 1 154.044 4.60088 31
 1 -10 1 160.794 4.44952 2
 -2 10 -1 452.473 10.3699 24
 -2 10 -1 441.115 10.5626 30
 -2 10 -1 440.539 10.5029 7
 -2 10 -1 461.429 10.5573 7
 -2 10 -1 466.829 10.3798 4
 -2 10 -1 443.086 9.32558 12
 -2 10 -1 461.656 10.1177 10
 -2 10 -1 455.884 9.29642 22
 -2 10 -1 453.403 9.24935 8
 2 -10 1 457.413 10.5197 7
 2 -10 1 457.392 10.5528 7
 2 -10 1 455.029 11.3604 2
 2 -10 1 431.653 9.27551 17
 2 -10 1 456.191 9.32099 12
 2 -10 1 439.556 10.7208 31
 2 -10 1 454.188 10.2528 3
 2 -10 1 454.886 10.1386 10
 -3 10 -1 18.2151 1.0697 5
 -3 10 -1 18.7586 1.3962 7
 -3 10 -1 18.3625 1.74967 30
 -3 10 -1 18.7583 1.08287 4
 -3 10 -1 20.519 1.31494 10
 -3 10 -1 18.9197 1.14243 8
 -3 10 -1 19.3333 1.64882 24
 -3 10 -1 20.173 1.41002 7
 3 -10 1 17.9294 1.8139 31
 3 -10 1 17.9025 1.37436 7
 3 -10 1 19.0886 1.2097 2
 3 -10 1 19.1905 1.09872 8
 3 -10 1 18.4487 1.7942 32
 3 -10 1 21.2538 1.20533 12
 3 -10 1 19.1176 1.36346 7
 3 -10 1 16.5665 1.34694 28
 3 -10 1 17.68 1.08064 3
 3 -10 1 18.7055 1.39107 10
 -4 10 -1 6.22351 0.64324 5
 -4 10 -1 6.26174 0.71423 14
 -4 10 -1 5.18546 0.77533 7
 -4 10 -1 7.99823 0.90869 4
 -4 10 -1 6.96064 1.12089 30
 -4 10 -1 5.261 0.74403 10
 -4 10 -1 6.18338 0.74904 8
 -4 10 -1 7.69933 0.72753 25
 -4 10 -1 5.45351 0.8602 7
 -4 10 -1 6.33934 0.7594 16
 4 -10 1 4.99107 0.67241 2
 4 -10 1 6.31233 1.23781 32
 4 -10 1 5.52174 0.65724 3
 4 -10 1 5.91813 0.85691 7
 4 -10 1 6.10645 0.83073 7
 4 -10 1 6.0688 0.68007 8
 4 -10 1 5.36956 0.72703 12
 4 -10 1 5.11012 0.82085 10
 4 -10 1 3.70987 1.0138 31
 -5 10 -1 4.36204 0.7759 10
 -5 10 -1 4.09455 0.60619 4
 -5 10 -1 5.05332 0.68659 16
 -5 10 -1 5.81879 0.9159 7
 -5 10 -1 5.14846 0.65099 5
 -5 10 -1 3.11087 0.70808 8
 -5 10 -1 5.33527 0.84988 25
 -5 10 -1 6.17904 0.87161 7
 5 -10 1 5.16271 0.7141 12
 5 -10 1 4.13801 1.20259 31
 5 -10 1 2.84652 1.15705 32
 5 -10 1 3.52296 0.66117 3
 5 -10 1 3.21414 0.83025 7
 5 -10 1 3.79233 0.66263 2
 5 -10 1 3.92988 0.69502 8
 5 -10 1 6.82877 1.00007 7
 5 -10 1 4.16793 0.79665 13
 -6 10 -1 15.1177 1.44453 8
 -6 10 -1 17.4522 1.54241 25
 -6 10 -1 16.647 1.2101 4
 -6 10 -1 17.9722 1.79816 7
 -6 10 -1 17.6502 1.552 10
 -6 10 -1 17.8419 1.29363 5
 -6 10 -1 16.8072 1.52914 7
 -6 10 -1 19.1945 1.34102 3
 6 -10 1 14.7359 1.65763 32
 6 -10 1 17.991 1.36166 12
 6 -10 1 15.5064 1.30977 2
 6 -10 1 17.8537 1.38168 8
 6 -10 1 20.2074 1.7949 7
 6 -10 1 17.9681 1.55531 13
 6 -10 1 18.9791 1.38835 3
 6 -10 1 19.4399 1.60648 7
 6 -10 1 18.4582 1.69404 19
 -7 10 -1 16.4872 1.50631 5
 -7 10 -1 16.9574 1.99245 7
 -7 10 -1 16.1895 1.81397 11
 -7 10 -1 17.1168 1.81631 7
 -7 10 -1 14.9276 1.73141 10
 -7 10 -1 15.6289 1.29974 4
 -7 10 -1 16.362 1.50185 3
 -7 10 -1 19.2432 1.83873 25
 7 -10 1 19.6745 1.90684 7
 7 -10 1 18.5267 2.04635 7
 7 -10 1 16.4855 1.55906 3
 7 -10 1 15.1653 1.40665 12
 7 -10 1 16.8402 1.56748 8
 7 -10 1 16.2539 1.76242 13
 7 -10 1 15.7221 1.86743 32
 7 -10 1 16.807 1.71374 19
 -8 10 -1 21.3909 2.14922 7
 -8 10 -1 10.2195 1.08232 4
 -8 10 -1 16.6587 1.68789 7
 -8 10 -1 18.7 1.80319 3
 -8 10 -1 14.8073 1.44285 11
 -8 10 -1 11.7526 1.26811 10
 -8 10 -1 16.1964 1.82254 5
 8 -10 1 14.2203 1.4122 13
 8 -10 1 18.8661 1.80808 19
 8 -10 1 13.7556 1.37144 7
 8 -10 1 18.9584 1.92159 3
 8 -10 1 12.026 1.81618 32
 8 -10 1 18.3554 1.78036 7
 8 -10 1 19.0716 1.93282 8
 6 9 -1 0.21829 1.41408 32
 6 9 -1 -2.2045 1.30549 24
 6 9 -1 -1.9777 1.09599 7
 6 9 -1 0.72865 1.23303 17
 6 9 -1 0.17645 0.89941 12
 6 9 -1 0.82392 0.74776 5
 6 9 -1 -0.0007 1.20911 30
 6 9 -1 0.35029 0.76049 2
 6 9 -1 -1.4259 0.8114 7
 6 9 -1 -0.9754 0.86422 11
 -6 -9 1 0.91607 1.39817 24
 -6 -9 1 2.21593 0.84755 13
 -6 -9 1 0.47601 0.93482 18
 -6 -9 1 -1.3839 0.92181 7
 -6 -9 1 -0.7677 0.99905 7
 -6 -9 1 -0.1809 1.19199 31
 -6 -9 1 -0.6899 0.97881 9
 -6 -9 1 -1.4505 0.72506 20
 -6 -9 1 0.18614 1.01937 27
 -6 -9 1 -0.8227 0.80374 4
 5 9 -1 12.0753 1.5886 30
 5 9 -1 18.8358 1.9476 7
 5 9 -1 18.6211 1.55256 7
 5 9 -1 16.9469 1.72461 17
 5 9 -1 17.018 1.37649 11
 5 9 -1 17.5526 1.36857 2
 5 9 -1 20.2011 1.45007 5
 5 9 -1 17.512 1.46052 12
 5 9 -1 15.9556 1.4936 24
 5 9 -1 16.0386 1.78024 32
 -5 -9 1 16.5655 1.70694 7
 -5 -9 1 12.3899 1.54553 31
 -5 -9 1 17.1041 1.53519 9
 -5 -9 1 15.8602 1.58399 24
 -5 -9 1 16.6481 1.4015 4
 -5 -9 1 15.7485 1.64675 7
 -5 -9 1 18.352 1.29805 2
 -5 -9 1 15.1339 1.50044 13
 4 9 -1 29.823 1.46133 12
 4 9 -1 29.0391 2.14463 30
 4 9 -1 33.0915 1.61058 17
 4 9 -1 31.3843 1.66066 7
 4 9 -1 31.5433 1.24527 15
 4 9 -1 29.1717 1.652 11
 4 9 -1 37.6526 1.98882 7
 4 9 -1 32.5172 2.22639 32
 4 9 -1 32.6865 2.01097 24
 4 9 -1 33.3098 1.5893 2
 -4 -9 1 34.3505 1.50325 2
 -4 -9 1 32.9098 2.224 31
 -4 -9 1 31.1005 1.73195 10
 -4 -9 1 33.1884 1.61094 9
 -4 -9 1 34.1423 1.73012 7
 -4 -9 1 33.0279 1.84933 7
 -4 -9 1 33.5128 1.74105 13
 -4 -9 1 28.4798 2.16726 24
 -4 -9 1 32.7423 1.5036 4
 3 9 -1 -0.9159 0.91087 30
 3 9 -1 -0.832 0.66202 26
 3 9 -1 -0.35 0.54589 7
 3 9 -1 0.52679 0.56996 12
 3 9 -1 0.37206 0.57943 17
 3 9 -1 0.07736 0.46087 4
 3 9 -1 -0.2892 0.61001 7
 3 9 -1 0.79949 0.55245 2
 3 9 -1 0.15823 0.71296 24
 3 9 -1 -0.0894 0.9183 32
 3 9 -1 0.4844 0.56996 11
 -3 -9 1 0.54596 0.4637 2
 -3 -9 1 0.95124 0.89622 31
 -3 -9 1 -0.3133 0.49567 9
 -3 -9 1 0.5319 0.87809 24
 -3 -9 1 0.25784 0.52966 4
 -3 -9 1 -0.4188 0.60831 10
 -3 -9 1 0.85395 0.63528 7
 -3 -9 1 -0.1291 0.63084 7
 2 9 -1 0.53021 0.49552 2
 2 9 -1 0.52364 0.43322 4
 2 9 -1 0.52672 0.64713 7
 2 9 -1 0.19511 0.51697 7
 2 9 -1 0.57242 0.5661 24
 2 9 -1 0.1887 0.88761 30
 2 9 -1 -0.2182 0.5199 11
 2 9 -1 1.49362 0.9759 32
 2 9 -1 0.08772 0.50811 12
 -2 -9 1 0.57652 0.46579 4
 -2 -9 1 0.82317 0.49949 23
 -2 -9 1 -1.171 0.88141 31
 -2 -9 1 0.85657 0.48059 9
 -2 -9 1 0.4258 0.45724 2
 -2 -9 1 -0.4209 0.54923 7
 -2 -9 1 -0.2452 0.60293 7
 -2 -9 1 0.03843 0.55504 10
 1 9 -1 12.7853 1.33514 24
 1 9 -1 11.2518 0.9639 12
 1 9 -1 10.3317 0.84044 4
 1 9 -1 9.32412 0.99071 7
 1 9 -1 11.43 1.11241 11
 1 9 -1 11.5272 1.14039 7
 1 9 -1 10.3871 0.85426 8
 1 9 -1 12.9767 1.45382 30
 -1 -9 1 10.5064 0.85166 2
 -1 -9 1 9.71132 1.11722 7
 -1 -9 1 11.4254 1.26335 31
 -1 -9 1 10.4535 0.80837 14
 -1 -9 1 10.5945 1.09435 9
 -1 -9 1 10.5639 1.10507 7
 -1 -9 1 11.1426 1.0439 10
 -1 -9 1 11.7718 0.89223 12
 -1 -9 1 9.40573 0.88709 4
 0 9 -1 50.0322 1.45505 8
 0 9 -1 44.6367 1.83645 7
 0 9 -1 49.8342 1.77557 7
 0 9 -1 48.1025 1.27048 20
 0 9 -1 50.2502 1.5777 12
 0 9 -1 52.0461 1.62315 4
 0 9 -1 48.8761 2.13179 30
 0 9 -1 53.2335 2.00524 24
 0 -9 1 49.8357 1.69666 10
 0 -9 1 50.4179 1.75117 2
 0 -9 1 47.1069 1.82711 7
 0 -9 1 49.3121 1.53624 12
 0 -9 1 47.3749 1.83936 7
 0 -9 1 52.2695 1.69046 4
 0 -9 1 50.236 2.23794 31
 -1 9 -1 395.74 8.15487 12
 -1 9 -1 400.409 9.06802 4
 -1 9 -1 389.177 9.24721 30
 -1 9 -1 401.206 9.18607 7
 -1 9 -1 394.594 8.8404 10
 -1 9 -1 395.902 8.25048 22
 -1 9 -1 389.374 9.0851 24
 -1 9 -1 396.782 9.22079 7
 -1 9 -1 393.016 8.08165 8
 1 -9 1 393.027 9.40282 31
 1 -9 1 392.47 8.99924 3
 1 -9 1 400.383 9.25724 7
 1 -9 1 407.047 8.15157 12
 1 -9 1 384.155 8.11083 17
 1 -9 1 399.464 9.95044 2
 1 -9 1 402.01 8.86681 10
 1 -9 1 403.752 9.11298 4
 1 -9 1 396.343 9.22234 7
 -2 9 -1 1004.1 21.569 24
 -2 9 -1 1034.73 22.2053 7
 -2 9 -1 996.254 19.7318 8
 -2 9 -1 997.848 19.9715 22
 -2 9 -1 995.889 21.7316 30
 -2 9 -1 970.533 19.6817 12
 -2 9 -1 988.925 22.0312 4
 -2 9 -1 1003.51 21.4294 10
 -2 9 -1 1000.05 22.2113 7
 2 -9 1 999.765 22.2099 7
 2 -9 1 998.536 24.1926 2
 2 -9 1 981.534 22.0009 3
 2 -9 1 997.67 22.1828 7
 2 -9 1 988.745 21.4487 10
 2 -9 1 1004.95 19.6849 12
 2 -9 1 980.592 22.0218 31
 -3 9 -1 22.2427 0.94867 25
 -3 9 -1 24.596 1.39653 7
 -3 9 -1 22.0604 1.12416 8
 -3 9 -1 25.0153 1.33991 7
 -3 9 -1 20.8096 1.22937 10
 -3 9 -1 23.6394 1.14582 4
 -3 9 -1 21.9364 1.05417 5
 -3 9 -1 21.0867 1.7859 30
 -3 9 -1 19.6671 1.59675 24
 -3 9 -1 22.1343 0.78868 14
 3 -9 1 21.6523 1.76114 32
 3 -9 1 20.8094 1.08214 3
 3 -9 1 23.2249 1.05768 8
 3 -9 1 22.4936 1.19933 12
 3 -9 1 24.6133 1.35485 7
 3 -9 1 19.6433 1.78975 31
 3 -9 1 21.3379 1.23978 28
 3 -9 1 24.4934 1.34893 7
 3 -9 1 23.8132 1.37926 10
 3 -9 1 24.8055 1.25426 2
 -4 9 -1 144.421 3.15509 25
 -4 9 -1 140.553 3.57402 5
 -4 9 -1 146.818 3.86616 7
 -4 9 -1 123.892 3.65243 10
 -4 9 -1 143.213 3.36199 8
 -4 9 -1 143.377 3.73642 4
 -4 9 -1 139.409 4.14836 30
 -4 9 -1 149.979 3.88685 7
 -4 9 -1 144.249 3.23374 16
 4 -9 1 144.57 4.02751 2
 4 -9 1 148.8 3.34615 8
 4 -9 1 140.512 3.77283 10
 4 -9 1 142.123 3.60703 3
 4 -9 1 147.326 3.48188 12
 4 -9 1 139.94 4.23982 31
 4 -9 1 146.616 3.89597 7
 4 -9 1 142.834 4.16246 32
 4 -9 1 144.922 3.83815 7
 -5 9 -1 26.4957 1.33616 25
 -5 9 -1 25.2591 1.31917 8
 -5 9 -1 23.0886 1.15899 5
 -5 9 -1 24.3537 1.52053 7
 -5 9 -1 21.4176 1.20828 4
 -5 9 -1 26.3329 1.2121 3
 -5 9 -1 24.1989 1.1061 16
 -5 9 -1 24.8864 1.44412 7
 -5 9 -1 24.6045 1.42208 10
 5 -9 1 21.9986 1.86378 31
 5 -9 1 22.1744 1.22907 8
 5 -9 1 26.3382 1.25724 3
 5 -9 1 23.7323 1.46532 7
 5 -9 1 24.3037 1.87871 32
 5 -9 1 23.807 1.37771 13
 5 -9 1 24.9636 1.52997 7
 5 -9 1 25.7931 1.3044 12
 -6 9 -1 6.05624 0.71938 5
 -6 9 -1 5.39976 0.75715 8
 -6 9 -1 5.52641 0.80886 7
 -6 9 -1 6.4024 0.75353 4
 -6 9 -1 5.25149 0.9683 7
 -6 9 -1 4.54935 0.76202 10
 -6 9 -1 5.73392 0.68345 3
 6 -9 1 7.129 0.77675 3
 6 -9 1 6.83556 1.01186 7
 6 -9 1 5.12067 1.28453 32
 6 -9 1 5.48829 0.73066 8
 6 -9 1 6.11146 0.83252 13
 6 -9 1 5.60205 0.70591 12
 6 -9 1 6.0934 0.55893 22
 6 -9 1 6.83806 0.89902 19
 6 -9 1 6.22974 0.82035 7
 -7 9 -1 24.5294 1.71372 11
 -7 9 -1 21.834 1.57557 10
 -7 9 -1 19.6198 1.47962 5
 -7 9 -1 20.8103 1.31813 4
 -7 9 -1 23.8998 1.8857 7
 -7 9 -1 22.6241 1.68559 7
 -7 9 -1 20.6948 1.40669 3
 7 -9 1 19.9677 1.14939 22
 7 -9 1 20.0828 1.65024 13
 7 -9 1 23.9003 1.69794 7
 7 -9 1 23.0818 1.51644 3
 7 -9 1 21.9929 1.5065 8
 7 -9 1 21.6145 1.89854 7
 7 -9 1 22.2454 1.37172 12
 7 -9 1 22.4024 2.20993 32
 7 -9 1 19.9889 1.62174 33
 7 -9 1 22.9543 1.50549 19
 -8 9 -1 20.8254 1.97356 7
 -8 9 -1 16.316 1.69082 5
 -8 9 -1 12.8437 1.14788 10
 -8 9 -1 17.3272 1.52276 4
 -8 9 -1 17.4391 1.9415 11
 -8 9 -1 14.2148 1.49525 7
 -8 9 -1 15.7946 1.55884 3
 8 -9 1 16.5483 1.67167 3
 8 -9 1 17.8966 1.64605 7
 8 -9 1 16.8482 1.39466 13
 8 -9 1 15.1375 1.41313 22
 8 -9 1 19.0479 1.48229 12
 8 -9 1 17.8559 1.92731 7
 8 -9 1 19.141 1.5063 33
 8 -9 1 16.9071 1.70719 8
 8 -9 1 15.619 1.97864 32
 7 8 -1 -1.7693 0.91255 11
 7 8 -1 -0.675 1.42598 24
 7 8 -1 -1.3979 0.86063 7
 7 8 -1 -0.9037 1.27081 7
 7 8 -1 0.20706 1.40103 32
 7 8 -1 -1.3336 0.79486 2
 7 8 -1 -0.2718 0.96189 12
 7 8 -1 1.30732 1.39143 30
 7 8 -1 -0.697 0.67599 5
 -7 -8 1 -1.441 1.03169 9
 -7 -8 1 -0.1308 0.98734 20
 -7 -8 1 0.30517 0.84175 18
 -7 -8 1 0.15497 0.86614 13
 -7 -8 1 0.75477 1.05891 7
 -7 -8 1 -0.8657 1.00263 7
 -7 -8 1 -0.6992 1.2102 31
 -7 -8 1 -0.447 0.79749 4
 -7 -8 1 1.74204 1.55759 24
 6 8 -1 1.63203 0.80165 12
 6 8 -1 1.42572 0.72299 11
 6 8 -1 0.90504 0.73749 7
 6 8 -1 2.40879 1.10778 7
 6 8 -1 1.67727 1.30407 32
 6 8 -1 0.61032 1.11396 17
 6 8 -1 -0.08 1.11499 24
 6 8 -1 0.51944 1.21474 30
 6 8 -1 0.17405 0.69552 2
 6 8 -1 1.78128 0.64988 5
 -6 -8 1 0.79325 1.21718 24
 -6 -8 1 1.43478 0.88721 9
 -6 -8 1 0.78381 0.72878 13
 -6 -8 1 -0.3186 0.84987 7
 -6 -8 1 2.60432 0.96011 27
 -6 -8 1 1.34122 0.69685 4
 -6 -8 1 1.10733 0.77034 20
 -6 -8 1 0.40435 0.7619 18
 -6 -8 1 1.03838 1.14793 31
 -6 -8 1 1.21546 0.85134 7
 5 8 -1 2.78068 0.65308 5
 5 8 -1 2.4122 1.11519 30
 5 8 -1 2.80589 0.86388 17
 5 8 -1 2.29357 0.68256 12
 5 8 -1 -0.6222 0.97525 32
 5 8 -1 0.24605 0.59119 2
 5 8 -1 1.83349 0.65245 7
 5 8 -1 1.20359 0.59845 11
 5 8 -1 1.25503 0.93828 24
 5 8 -1 2.15935 0.93075 7
 -5 -8 1 0.11846 1.01671 24
 -5 -8 1 2.50278 0.64772 4
 -5 -8 1 0.93898 0.78002 7
 -5 -8 1 2.60666 0.71151 9
 -5 -8 1 2.41342 0.5934 20
 -5 -8 1 2.17369 1.03604 31
 -5 -8 1 1.38018 0.66398 13
 -5 -8 1 2.01728 0.70345 7
 -5 -8 1 1.66924 0.54472 2
 4 8 -1 1.67175 0.59565 12
 4 8 -1 1.69346 0.71894 17
 4 8 -1 -0.1159 0.90448 32
 4 8 -1 1.36141 0.72577 7
 4 8 -1 1.41998 0.42229 15
 4 8 -1 1.71019 0.54626 5
 4 8 -1 0.79826 0.5956 7
 4 8 -1 1.06554 0.97485 30
 4 8 -1 2.09418 0.79578 24
 4 8 -1 1.49223 0.59685 11
 4 8 -1 0.78788 0.52418 2
 -4 -8 1 1.64221 0.86967 24
 -4 -8 1 1.85497 0.66452 7
 -4 -8 1 0.50251 0.54903 9
 -4 -8 1 1.65404 0.53017 4
 -4 -8 1 1.8451 0.50854 2
 -4 -8 1 1.89467 0.67468 13
 -4 -8 1 1.57651 1.00971 31
 -4 -8 1 0.98058 0.60289 7
 3 8 -1 9.79062 0.96565 26
 3 8 -1 9.66147 1.12614 30
 3 8 -1 10.8348 0.87122 4
 3 8 -1 10.1912 1.29826 32
 3 8 -1 10.3721 1.00648 17
 3 8 -1 11.6064 1.22791 7
 3 8 -1 12.5091 1.13479 11
 3 8 -1 9.2041 0.93169 2
 3 8 -1 11.3667 1.02315 7
 3 8 -1 10.0658 1.00787 24
 3 8 -1 11.426 0.94632 12
 -3 -8 1 10.9789 1.07404 7
 -3 -8 1 10.9539 0.93086 4
 -3 -8 1 11.5024 1.14865 7
 -3 -8 1 10.2337 1.09376 10
 -3 -8 1 10.0258 1.13926 31
 -3 -8 1 10.8421 1.02095 9
 -3 -8 1 11.1846 1.11833 24
 -3 -8 1 11.2096 0.88448 2
 2 8 -1 0.13708 0.47771 7
 2 8 -1 0.69751 0.46324 12
 2 8 -1 -0.3575 0.86418 32
 2 8 -1 0.87892 0.44143 2
 2 8 -1 0.49989 0.3867 4
 2 8 -1 0.60549 0.46682 17
 2 8 -1 -0.3298 0.45864 11
 2 8 -1 0.38821 0.57276 7
 2 8 -1 1.46837 0.87851 30
 2 8 -1 0.09476 0.51451 24
 -2 -8 1 0.1839 0.48794 10
 -2 -8 1 0.06712 0.46326 7
 -2 -8 1 0.18638 0.39806 4
 -2 -8 1 0.75091 0.46065 9
 -2 -8 1 -0.054 0.50991 7
 -2 -8 1 0.58608 0.4191 23
 -2 -8 1 0.30343 0.37561 2
 -2 -8 1 -0.3129 0.78502 31
 -2 -8 1 1.206 0.70358 24
 1 8 -1 30.5307 1.08295 8
 1 8 -1 31.0554 1.31127 7
 1 8 -1 30.7226 1.39284 7
 1 8 -1 33.5415 1.55079 24
 1 8 -1 30.4179 1.65583 30
 1 8 -1 31.7356 1.41386 11
 1 8 -1 32.0948 1.17361 4
 1 8 -1 31.7719 1.15455 12
 -1 -8 1 32.1794 1.41405 7
 -1 -8 1 30.7184 1.27548 10
 -1 -8 1 31.1448 1.06877 14
 -1 -8 1 32.2969 1.23463 2
 -1 -8 1 31.0998 1.35663 9
 -1 -8 1 31.0512 1.69276 31
 -1 -8 1 30.594 1.36434 7
 -1 -8 1 31.7314 1.21783 4
 -1 -8 1 30.8463 1.11045 12
 0 8 -1 165.821 4.20469 7
 0 8 -1 165.059 3.59277 8
 0 8 -1 167.899 4.05912 4
 0 8 -1 168.463 4.2677 24
 0 8 -1 167.647 4.16654 7
 0 8 -1 164.787 4.37098 30
 0 8 -1 170.452 3.68071 12
 0 -8 1 168.975 3.65475 12
 0 -8 1 162.514 3.99653 10
 0 -8 1 172.06 4.44207 2
 0 -8 1 159.53 4.42154 31
 0 -8 1 166.014 4.22897 7
 0 -8 1 170.569 3.61851 14
 0 -8 1 169.98 4.09209 4
 0 -8 1 163.02 4.19338 7
 0 -8 1 169.63 3.3845 6
 -1 8 -1 328.548 7.58279 7
 -1 8 -1 324.274 7.54866 7
 -1 8 -1 319.894 7.41803 4
 -1 8 -1 321.864 7.24071 10
 -1 8 -1 322.524 6.60962 8
 -1 8 -1 328.077 6.75577 22
 -1 8 -1 330.266 7.61455 30
 -1 8 -1 323.854 7.48091 24
 -1 8 -1 321.748 6.68092 12
 1 -8 1 309.595 6.64765 17
 1 -8 1 329.04 8.14422 2
 1 -8 1 322.39 7.56695 7
 1 -8 1 321.535 7.26341 10
 1 -8 1 317.845 7.53512 7
 1 -8 1 315.144 7.69906 31
 1 -8 1 325.332 6.65859 12
 1 -8 1 327.632 7.45554 4
 1 -8 1 321.865 7.3602 3
 -2 8 -1 54.4475 1.95246 24
 -2 8 -1 51.2533 1.75533 7
 -2 8 -1 51.0853 1.74864 7
 -2 8 -1 50.5686 1.6406 10
 -2 8 -1 51.433 1.61781 4
 -2 8 -1 51.1312 1.99453 30
 -2 8 -1 50.7559 1.24642 25
 -2 8 -1 50.3969 1.44148 8
 -2 8 -1 51.7554 1.40149 22
 -2 8 -1 51.8806 1.59048 12
 2 -8 1 49.052 2.02493 32
 2 -8 1 50.9288 1.51464 3
 2 -8 1 50.3697 1.72769 2
 2 -8 1 51.6765 2.09537 31
 2 -8 1 52.9177 1.76668 7
 2 -8 1 48.7017 1.72343 7
 2 -8 1 49.9985 1.40538 8
 2 -8 1 51.4883 1.52805 12
 2 -8 1 49.3866 1.69271 10
 -3 8 -1 -0.1864 0.29476 14
 -3 8 -1 0.27465 0.33831 5
 -3 8 -1 -0.1644 0.36837 10
 -3 8 -1 0.07954 0.3413 4
 -3 8 -1 -0.1907 0.47151 7
 -3 8 -1 -0.1316 0.48324 7
 -3 8 -1 0.09836 0.44432 25
 -3 8 -1 -0.652 0.70859 30
 -3 8 -1 0.24318 0.40432 8
 3 -8 1 -0.0697 0.40264 12
 3 -8 1 -0.2515 0.49671 10
 3 -8 1 0.03052 0.33249 3
 3 -8 1 -0.1295 0.68113 31
 3 -8 1 0.37791 0.50929 7
 3 -8 1 0.27018 0.35408 8
 3 -8 1 0.68858 0.43166 7
 3 -8 1 0.60073 0.77736 32
 3 -8 1 0.07368 0.48811 28
 3 -8 1 -0.326 0.3269 2
 -4 8 -1 35.8337 1.45544 10
 -4 8 -1 35.4141 1.48404 7
 -4 8 -1 35.7361 1.25724 25
 -4 8 -1 35.0163 1.24844 5
 -4 8 -1 35.3942 1.22227 16
 -4 8 -1 29.4448 1.32235 4
 -4 8 -1 36.3507 1.26061 3
 -4 8 -1 34.9551 1.55288 7
 -4 8 -1 35.3673 1.30907 8
 4 -8 1 33.3163 1.27255 3
 4 -8 1 35.2398 1.25181 8
 4 -8 1 35.9306 1.52426 7
 4 -8 1 35.9908 1.52346 7
 4 -8 1 34.063 1.53186 10
 4 -8 1 33.913 1.88791 32
 4 -8 1 36.5901 1.39333 13
 4 -8 1 34.0771 1.89038 31
 4 -8 1 34.3399 1.32954 12
 -5 8 -1 64.8452 1.66649 16
 -5 8 -1 67.4526 2.21486 7
 -5 8 -1 66.0357 1.94995 3
 -5 8 -1 64.9483 1.928 5
 -5 8 -1 60.418 2.18548 7
 -5 8 -1 64.8983 2.15828 10
 -5 8 -1 66.1341 2.04874 4
 -5 8 -1 64.6341 1.92928 8
 5 -8 1 66.0695 1.99845 13
 5 -8 1 64.9759 2.59046 32
 5 -8 1 68.465 2.24616 7
 5 -8 1 65.5421 1.97993 12
 5 -8 1 62.7873 2.60566 31
 5 -8 1 67.8556 1.90961 8
 5 -8 1 62.5179 1.64603 22
 5 -8 1 65.1596 1.98017 3
 5 -8 1 69.3759 2.21108 7
 -6 8 -1 22.0636 1.41719 7
 -6 8 -1 21.01 1.37477 11
 -6 8 -1 22.5386 1.50659 7
 -6 8 -1 20.6492 1.3136 10
 -6 8 -1 20.4453 1.15021 3
 -6 8 -1 21.488 1.19401 4
 -6 8 -1 23.4139 1.19572 5
 6 -8 1 20.6962 1.35009 13
 6 -8 1 22.4389 1.43658 7
 6 -8 1 20.7947 1.19737 8
 6 -8 1 20.1024 1.54232 7
 6 -8 1 21.4749 1.30056 19
 6 -8 1 21.3659 1.86621 32
 6 -8 1 21.7223 1.25936 33
 6 -8 1 19.4421 1.03284 22
 6 -8 1 19.8792 1.25519 3
 6 -8 1 22.4943 1.24712 12
 -7 8 -1 2.44211 0.63884 4
 -7 8 -1 1.47115 0.57276 3
 -7 8 -1 2.4655 0.79981 11
 -7 8 -1 2.60548 0.78247 7
 -7 8 -1 3.57008 0.69406 5
 -7 8 -1 2.90676 0.69754 10
 -7 8 -1 1.44573 0.86743 7
 7 -8 1 2.49808 0.68861 22
 7 -8 1 3.44904 0.91514 7
 7 -8 1 3.14194 0.79793 13
 7 -8 1 3.24065 0.85126 7
 7 -8 1 4.22429 0.99849 33
 7 -8 1 1.79518 1.16636 32
 7 -8 1 3.07123 0.72078 19
 7 -8 1 3.84734 0.70519 12
 7 -8 1 2.49607 0.67014 8
 7 -8 1 1.99987 0.6858 3
 -8 8 -1 3.88139 0.77302 3
 -8 8 -1 4.60123 1.01297 7
 -8 8 -1 4.14611 1.00975 11
 -8 8 -1 7.09664 1.24345 7
 -8 8 -1 3.92311 0.85958 10
 -8 8 -1 5.20529 1.05845 21
 -8 8 -1 5.16013 0.92729 5
 -8 8 -1 3.10878 0.73699 4
 8 -8 1 6.22349 0.84454 12
 8 -8 1 6.62257 1.02764 13
 8 -8 1 6.44239 1.23798 7
 8 -8 1 4.64691 0.84867 3
 8 -8 1 3.0834 1.38736 32
 8 -8 1 6.3607 1.30414 33
 8 -8 1 3.48732 1.0461 7
 8 -8 1 5.16724 0.97172 9
 8 -8 1 6.28951 0.90323 8
 -9 8 -1 -0.7932 0.89027 4
 -9 8 -1 0.58275 1.20792 7
 -9 8 -1 0.12847 0.83764 3
 -9 8 -1 -0.2606 1.14977 21
 -9 8 -1 0.00232 1.21085 11
 -9 8 -1 -0.5553 1.00649 7
 -9 8 -1 -1.6928 0.92504 5
 9 -8 1 1.08113 1.18934 13
 9 -8 1 -0.0173 1.10298 9
 9 -8 1 0.08073 1.3441 7
 9 -8 1 0.57101 1.026 7
 9 -8 1 -0.0913 0.91003 8
 9 -8 1 -0.3887 1.43314 32
 9 -8 1 -1.0856 1.47756 33
 7 7 -1 2.15409 1.18472 7
 7 7 -1 2.32849 0.86764 12
 7 7 -1 3.75131 1.2779 24
 7 7 -1 2.46212 0.79716 2
 7 7 -1 2.53683 0.60248 5
 7 7 -1 2.67827 0.93986 11
 7 7 -1 2.90976 1.30745 32
 7 7 -1 0.4456 0.74648 7
 7 7 -1 1.96622 1.4096 30
 -7 -7 1 4.94019 1.37984 31
 -7 -7 1 3.88722 1.07465 7
 -7 -7 1 2.40859 0.74123 18
 -7 -7 1 1.05398 0.95646 9
 -7 -7 1 0.49574 0.79501 13
 -7 -7 1 2.24409 0.96688 7
 -7 -7 1 2.21516 0.97 20
 -7 -7 1 4.47631 1.37662 24
 -7 -7 1 2.25733 0.78175 4
 6 7 -1 5.64054 1.34181 30
 6 7 -1 5.2049 0.79989 7
 6 7 -1 6.1942 0.70507 5
 6 7 -1 5.91372 0.74544 2
 6 7 -1 7.69761 1.16253 24
 6 7 -1 7.60493 1.09785 7
 6 7 -1 6.45914 0.82506 12
 6 7 -1 8.05554 1.41289 32
 6 7 -1 4.71967 0.7956 11
 -6 -7 1 7.21325 1.35022 31
 -6 -7 1 8.05266 0.98952 9
 -6 -7 1 6.16455 0.91361 7
 -6 -7 1 6.35517 1.19429 24
 -6 -7 1 6.99457 0.76259 4
 -6 -7 1 5.74677 0.77397 18
 -6 -7 1 6.46581 0.97492 7
 -6 -7 1 7.37822 0.8509 13
 -6 -7 1 8.01142 0.85643 20
 5 7 -1 22.6007 1.90242 32
 5 7 -1 23.9226 1.43827 7
 5 7 -1 27.6839 1.72986 24
 5 7 -1 27.4338 1.29637 12
 5 7 -1 28.3536 1.36615 5
 5 7 -1 27.1542 1.9813 30
 5 7 -1 26.3263 1.33929 2
 5 7 -1 30.7173 1.72539 7
 5 7 -1 27.2054 1.45707 11
 -5 -7 1 29.4787 1.92046 24
 -5 -7 1 28.8815 1.20679 20
 -5 -7 1 25.6051 1.46082 13
 -5 -7 1 28.2131 1.46408 9
 -5 -7 1 27.8281 1.30375 4
 -5 -7 1 24.8149 1.93095 31
 -5 -7 1 28.0413 1.56296 7
 -5 -7 1 28.3523 1.48613 7
 4 7 -1 9.30404 0.92333 5
 4 7 -1 10.2228 1.14266 30
 4 7 -1 11.6348 1.17025 17
 4 7 -1 11.8823 0.95337 12
 4 7 -1 11.023 1.04864 11
 4 7 -1 12.4383 1.24667 7
 4 7 -1 9.23362 0.93867 24
 4 7 -1 10.6248 1.01367 7
 4 7 -1 10.727 0.91838 2
 4 7 -1 8.13249 1.0853 32
 -4 -7 1 9.38671 0.8937 4
 -4 -7 1 9.76259 1.04357 9
 -4 -7 1 8.92746 1.0245 7
 -4 -7 1 10.4168 1.12355 7
 -4 -7 1 11.2996 0.84836 2
 -4 -7 1 11.8106 0.77562 20
 -4 -7 1 9.0201 1.09255 31
 -4 -7 1 12.0376 1.12648 24
 -4 -7 1 11.2302 1.1966 13
 3 7 -1 6.78071 0.58344 12
 3 7 -1 6.84808 0.72852 11
 3 7 -1 7.97175 0.61642 26
 3 7 -1 4.95199 0.8702 32
 3 7 -1 6.72523 0.78302 24
 3 7 -1 7.78128 0.89032 7
 3 7 -1 5.3999 0.62273 7
 3 7 -1 6.66008 0.66431 17
 3 7 -1 6.93384 0.71517 4
 3 7 -1 6.55304 0.93902 30
 3 7 -1 6.11153 0.77673 2
 -3 -7 1 7.79843 0.92674 7
 -3 -7 1 6.33758 0.75636 4
 -3 -7 1 6.33714 0.65653 9
 -3 -7 1 5.61283 0.86048 24
 -3 -7 1 7.53916 0.70323 7
 -3 -7 1 5.50426 0.90097 31
 -3 -7 1 7.03032 0.69248 2
 2 7 -1 1.61546 0.41262 2
 2 7 -1 2.76332 0.52524 7
 2 7 -1 2.40229 0.40481 4
 2 7 -1 3.11963 0.8843 32
 2 7 -1 1.44845 0.4704 11
 2 7 -1 2.15662 0.41807 12
 2 7 -1 3.08007 0.79087 30
 2 7 -1 2.72634 0.57295 24
 2 7 -1 2.31762 0.45616 17
 2 7 -1 2.53681 0.55121 7
 -2 -7 1 2.26354 0.48014 10
 -2 -7 1 1.30129 0.4733 7
 -2 -7 1 2.42973 0.42643 4
 -2 -7 1 2.18629 0.48224 9
 -2 -7 1 2.88963 0.79038 31
 -2 -7 1 2.72889 0.42828 23
 -2 -7 1 1.91182 0.41845 7
 -2 -7 1 2.19333 0.69067 24
 -2 -7 1 2.38997 0.41154 2
 1 7 -1 31.329 1.53156 30
 1 7 -1 33.2145 1.12309 4
 1 7 -1 32.0691 1.3292 11
 1 7 -1 32.1047 1.45034 24
 1 7 -1 31.7813 1.08255 12
 1 7 -1 32.5767 1.31481 7
 1 7 -1 30.6711 1.22804 2
 1 7 -1 31.4552 1.25124 7
 -1 -7 1 32.8617 1.26399 9
 -1 -7 1 33.3039 1.61416 31
 -1 -7 1 32.6812 1.20511 10
 -1 -7 1 33.0675 1.33705 7
 -1 -7 1 30.5747 1.28247 7
 -1 -7 1 33.6734 1.05381 12
 -1 -7 1 31.5591 1.18166 2
 -1 -7 1 31.424 1.15627 4
 0 7 -1 133.7 3.39982 7
 0 7 -1 135.454 2.93395 8
 0 7 -1 135.869 2.9984 12
 0 7 -1 132.926 3.57981 30
 0 7 -1 134.368 3.43809 7
 0 7 -1 136.837 3.31935 4
 0 -7 1 129.141 2.92052 17
 0 -7 1 142.441 2.76405 6
 0 -7 1 133.158 2.97834 12
 0 -7 1 133.533 3.27549 10
 0 -7 1 135.636 3.62173 2
 0 -7 1 136.276 3.65064 31
 0 -7 1 138.099 2.95099 14
 0 -7 1 131.3 3.43498 7
 0 -7 1 136.741 3.47709 7
 0 -7 1 138.744 3.35044 4
 -1 7 -1 349.197 8.11638 7
 -1 7 -1 348.088 7.17179 12
 -1 7 -1 356.761 8.08554 30
 -1 7 -1 365.003 6.90504 25
 -1 7 -1 359.483 7.27706 22
 -1 7 -1 349.9 7.79699 10
 -1 7 -1 350.253 7.97772 24
 -1 7 -1 354.213 8.1024 7
 -1 7 -1 350.569 7.12211 8
 -1 7 -1 357.444 8.00688 4
 1 -7 1 342.228 8.07983 7
 1 -7 1 351.349 7.15839 12
 1 -7 1 353.63 8.76546 2
 1 -7 1 344.811 7.22083 17
 1 -7 1 351.31 8.02072 4
 1 -7 1 353.647 8.12215 7
 1 -7 1 346.191 8.18301 31
 1 -7 1 351.138 7.95094 3
 1 -7 1 354.889 7.82113 10
 -2 7 -1 32.893 1.15811 12
 -2 7 -1 29.7627 1.24044 7
 -2 7 -1 29.586 0.8087 14
 -2 7 -1 28.0491 1.14489 10
 -2 7 -1 30.5209 0.90113 25
 -2 7 -1 32.8933 1.25423 7
 -2 7 -1 31.9873 1.02319 8
 -2 7 -1 31.2701 1.46983 30
 -2 7 -1 31.309 1.14016 4
 2 -7 1 30.9016 1.04104 3
 2 -7 1 29.2869 1.19226 2
 2 -7 1 31.6446 1.22872 7
 2 -7 1 31.4521 1.50362 32
 2 -7 1 31.2445 1.53172 31
 2 -7 1 30.7813 0.97714 8
 2 -7 1 31.9487 1.11408 12
 2 -7 1 31.5288 1.23916 10
 -3 7 -1 0.64823 0.38616 10
 -3 7 -1 0.5114 0.41433 25
 -3 7 -1 0.35521 0.29544 3
 -3 7 -1 1.01554 0.44192 7
 -3 7 -1 0.93985 0.65236 30
 -3 7 -1 0.36794 0.3504 8
 -3 7 -1 0.61671 0.30199 5
 -3 7 -1 0.91963 0.46131 7
 -3 7 -1 0.44966 0.30234 4
 3 -7 1 0.43674 0.44753 7
 3 -7 1 0.37576 0.298 3
 3 -7 1 0.816 0.40013 28
 3 -7 1 0.26197 0.43967 10
 3 -7 1 0.12802 0.32404 8
 3 -7 1 0.32384 0.6384 32
 3 -7 1 0.93586 0.4379 7
 3 -7 1 0.36147 0.36823 12
 3 -7 1 1.15291 0.6667 31
 -4 7 -1 50.9999 1.69296 10
 -4 7 -1 51.0102 1.50772 3
 -4 7 -1 52.087 1.75497 7
 -4 7 -1 51.516 1.36423 16
 -4 7 -1 50.0985 1.73447 7
 -4 7 -1 50.1746 1.491 5
 -4 7 -1 48.9027 1.49125 8
 -4 7 -1 50.0295 1.61403 4
 4 -7 1 52.4885 1.47622 8
 4 -7 1 51.357 1.58285 12
 4 -7 1 48.7665 1.74713 7
 4 -7 1 48.8333 1.53338 3
 4 -7 1 52.2681 1.73648 7
 4 -7 1 48.6308 1.31719 22
 4 -7 1 48.748 1.5501 13
 4 -7 1 50.1766 2.05105 32
 4 -7 1 51.3817 1.75048 10
 4 -7 1 50.1969 2.06701 31
 -5 7 -1 6.20963 0.65436 7
 -5 7 -1 7.23764 0.77856 7
 -5 7 -1 6.51901 0.72211 3
 -5 7 -1 6.36925 0.66833 4
 -5 7 -1 6.66511 0.75921 5
 -5 7 -1 5.90173 0.6351 8
 -5 7 -1 5.98896 0.68889 10
 5 -7 1 7.49949 0.69879 19
 5 -7 1 6.1737 0.59891 3
 5 -7 1 7.77661 0.68499 33
 5 -7 1 5.74258 0.56454 8
 5 -7 1 7.75534 1.10077 32
 5 -7 1 5.634 0.51537 22
 5 -7 1 6.10323 0.71366 7
 5 -7 1 6.42571 0.66505 12
 5 -7 1 6.4743 0.68127 13
 5 -7 1 4.80886 0.62974 7
 -6 7 -1 0.311 0.45779 4
 -6 7 -1 0.65921 0.68042 7
 -6 7 -1 0.81838 0.50526 10
 -6 7 -1 1.24865 0.58135 11
 -6 7 -1 0.87447 0.59566 7
 -6 7 -1 0.6731 0.41297 3
 -6 7 -1 1.10191 0.49796 5
 6 -7 1 2.07208 0.64555 7
 6 -7 1 0.95698 0.51082 3
 6 -7 1 1.38485 0.60152 13
 6 -7 1 0.68611 0.53445 19
 6 -7 1 1.17246 0.48801 8
 6 -7 1 1.10027 0.6508 7
 6 -7 1 1.55514 0.55378 12
 6 -7 1 1.44469 0.73556 33
 6 -7 1 0.5028 0.98005 32
 -7 7 -1 11.5918 1.10452 4
 -7 7 -1 9.10315 0.87061 10
 -7 7 -1 9.43206 0.95568 7
 -7 7 -1 11.5634 1.04322 3
 -7 7 -1 12.2761 1.32335 11
 -7 7 -1 12.7687 1.48689 7
 -7 7 -1 12.6687 1.14976 5
 7 -7 1 12.4745 1.14638 12
 7 -7 1 12.9067 1.16817 33
 7 -7 1 12.1224 1.34762 7
 7 -7 1 12.9075 1.15981 7
 7 -7 1 10.2629 1.09526 5
 7 -7 1 12.567 1.0995 8
 7 -7 1 10.6701 1.44665 32
 7 -7 1 11.7637 1.22215 3
 7 -7 1 11.0982 0.97824 13
 -8 7 -1 -1.442 0.87587 21
 -8 7 -1 0.13391 0.89835 7
 -8 7 -1 -0.1174 0.83795 11
 -8 7 -1 -0.4643 0.75229 7
 -8 7 -1 0.64274 0.73082 5
 -8 7 -1 -0.8238 0.60826 3
 -8 7 -1 -0.5916 0.58278 10
 8 -7 1 -0.4155 0.61637 12
 8 -7 1 -1.5015 1.2785 32
 8 -7 1 0.67134 0.83664 13
 8 -7 1 -0.3216 0.65842 5
 8 -7 1 1.19667 1.17804 33
 8 -7 1 0.53262 0.86951 7
 8 -7 1 -0.844 0.76887 9
 8 -7 1 -1.0024 0.60739 8
 8 -7 1 -0.1081 0.75736 7
 -9 7 -1 0.15718 0.89106 5
 -9 7 -1 -0.4908 1.00869 11
 -9 7 -1 -1.2306 0.78248 10
 -9 7 -1 -0.3276 1.10435 7
 -9 7 -1 -0.3498 1.03466 21
 -9 7 -1 0.7666 0.94928 7
 9 -7 1 -0.0722 1.36446 32
 9 -7 1 -1.4489 0.96565 9
 9 -7 1 0.76383 1.42892 33
 9 -7 1 0.09675 0.9567 7
 9 -7 1 1.64675 1.25689 7
 9 -7 1 0.98522 0.8747 5
 9 -7 1 -0.7957 0.78172 12
 9 -7 1 0.19159 0.7472 8
 9 -7 1 1.53137 1.10255 13
 8 6 -1 5.60747 1.43585 30
 8 6 -1 5.81393 1.08915 7
 8 6 -1 5.07087 0.94859 2
 8 6 -1 3.8455 1.39872 7
 8 6 -1 7.14894 1.22666 23
 8 6 -1 5.76485 0.76428 21
 8 6 -1 2.91649 0.747 5
 8 6 -1 4.25706 1.16065 11
 8 6 -1 4.28254 1.54422 32
 -8 -6 1 3.67612 1.44849 31
 -8 -6 1 4.53328 0.96374 13
 -8 -6 1 4.16676 1.09486 7
 -8 -6 1 5.1312 1.16875 9
 -8 -6 1 3.70522 1.1186 7
 -8 -6 1 6.12734 1.59243 24
 -8 -6 1 4.4081 0.78552 3
 -8 -6 1 4.57006 0.94154 4
 7 6 -1 6.39457 1.4183 32
 7 6 -1 7.87776 0.79033 5
 7 6 -1 7.86053 1.38439 30
 7 6 -1 12.8221 1.38517 7
 7 6 -1 8.38681 1.19101 7
 7 6 -1 9.14018 1.08592 11
 7 6 -1 9.10125 1.01952 23
 7 6 -1 10.5641 0.92606 2
 -7 -6 1 9.92464 1.12023 7
 -7 -6 1 8.89019 1.48329 31
 -7 -6 1 11.0626 1.1701 7
 -7 -6 1 9.35277 1.3743 24
 -7 -6 1 7.09632 0.94863 13
 -7 -6 1 8.98175 1.01805 9
 -7 -6 1 9.59749 0.90191 4
 -7 -6 1 8.65956 0.75531 18
 6 6 -1 13.1675 1.43753 32
 6 6 -1 15.0962 1.57427 7
 6 6 -1 15.4089 1.22286 23
 6 6 -1 12.619 1.22517 11
 6 6 -1 13.6716 1.51993 30
 6 6 -1 13.9645 1.13058 2
 6 6 -1 13.5764 1.2406 7
 6 6 -1 14.3799 1.06472 5
 6 6 -1 12.7246 1.19729 24
 -6 -6 1 17.4858 1.81225 24
 -6 -6 1 14.2776 1.10461 18
 -6 -6 1 16.7974 1.33371 9
 -6 -6 1 14.1934 1.33449 7
 -6 -6 1 14.8497 1.4336 7
 -6 -6 1 15.1601 1.16236 4
 -6 -6 1 13.185 1.52667 31
 -6 -6 1 16.0548 1.29917 13
 5 6 -1 67.0024 2.16216 7
 5 6 -1 68.7404 2.24343 11
 5 6 -1 64.5223 2.31667 24
 5 6 -1 64.9732 2.59109 30
 5 6 -1 65.4419 2.64019 32
 5 6 -1 66.8271 2.10197 2
 5 6 -1 66.8869 2.1203 5
 5 6 -1 68.7396 2.32991 7
 -5 -6 1 65.1496 2.41133 24
 -5 -6 1 69.2298 2.18882 13
 -5 -6 1 65.563 2.1867 7
 -5 -6 1 65.1046 2.09848 9
 -5 -6 1 66.2742 1.85816 20
 -5 -6 1 66.2032 1.98679 4
 -5 -6 1 66.3958 2.26452 7
 -5 -6 1 67.106 2.6628 31
 4 6 -1 66.9201 2.05582 7
 4 6 -1 66.7111 2.01278 2
 4 6 -1 66.8211 2.02425 5
 4 6 -1 67.2355 2.14304 7
 4 6 -1 64.9029 1.73897 12
 4 6 -1 64.4668 2.15244 24
 4 6 -1 62.1485 2.37262 30
 4 6 -1 67.3732 2.43419 32
 4 6 -1 66.4044 2.12802 11
 -4 -6 1 64.8596 1.88548 4
 -4 -6 1 65.4122 2.12601 7
 -4 -6 1 64.7243 1.67416 20
 -4 -6 1 61.7702 2.40643 31
 -4 -6 1 65.4609 2.08696 13
 -4 -6 1 64.8907 2.04971 7
 -4 -6 1 65.613 1.96346 2
 -4 -6 1 67.183 2.27141 24
 -4 -6 1 66.8279 2.0058 9
 3 6 -1 1.27809 0.45333 26
 3 6 -1 0.90368 0.49733 24
 3 6 -1 1.29202 0.46883 11
 3 6 -1 0.22274 0.35438 2
 3 6 -1 0.51159 0.6137 30
 3 6 -1 1.04318 0.40258 7
 3 6 -1 1.19602 0.38126 12
 3 6 -1 0.52155 0.6293 32
 3 6 -1 0.63286 0.48999 17
 3 6 -1 0.69023 0.41624 7
 -3 -6 1 1.1895 0.31279 20
 -3 -6 1 0.81019 0.59385 31
 -3 -6 1 1.29581 0.41734 9
 -3 -6 1 1.09461 0.57451 24
 -3 -6 1 0.71437 0.41944 7
 -3 -6 1 0.59206 0.35046 4
 -3 -6 1 0.26622 0.2823 2
 -3 -6 1 0.92048 0.47732 7
 2 6 -1 131.075 3.14744 4
 2 6 -1 130.891 3.28172 7
 2 6 -1 128.548 3.47377 32
 2 6 -1 131.579 2.82304 12
 2 6 -1 125.405 3.4233 2
 2 6 -1 131.998 3.30889 7
 2 6 -1 129.447 3.32875 24
 2 6 -1 130.26 3.44576 30
 2 6 -1 134.491 2.93432 17
 2 6 -1 128.452 3.37094 11
 -2 -6 1 127.901 3.30561 7
 -2 -6 1 130.308 3.3699 24
 -2 -6 1 127.618 3.49379 31
 -2 -6 1 130.823 3.42004 2
 -2 -6 1 127.839 3.1473 4
 -2 -6 1 126.636 2.86054 23
 -2 -6 1 127.049 3.18999 9
 -2 -6 1 130.445 3.27751 7
 1 6 -1 41.2385 1.25891 4
 1 6 -1 40.641 1.36362 7
 1 6 -1 42.3262 1.39516 2
 1 6 -1 42.7302 1.15642 17
 1 6 -1 41.6426 1.61588 30
 1 6 -1 43.9962 1.4324 7
 1 6 -1 43.2098 1.54269 24
 1 6 -1 42.2165 1.47073 11
 1 6 -1 42.8693 1.17794 12
 -1 -6 1 42.3289 1.15147 12
 -1 -6 1 43.0845 1.44539 7
 -1 -6 1 41.7593 1.3893 9
 -1 -6 1 40.9399 1.60007 24
 -1 -6 1 41.3626 1.32798 10
 -1 -6 1 42.8614 1.36726 2
 -1 -6 1 41.7929 1.65756 31
 -1 -6 1 41.1602 1.28545 4
 0 6 -1 13.0407 0.67586 4
 0 6 -1 14.3237 0.81437 7
 0 6 -1 13.2084 1.01961 30
 0 6 -1 12.4428 0.59424 8
 0 6 -1 13.0275 0.767 7
 0 6 -1 13.9324 0.68505 12
 0 -6 1 12.6654 0.78708 10
 0 -6 1 13.9272 0.67312 12
 0 -6 1 13.5932 0.72217 2
 0 -6 1 12.3555 0.81118 7
 0 -6 1 13.4295 0.60197 17
 0 -6 1 12.6779 0.82848 7
 0 -6 1 13.9279 0.52696 14
 0 -6 1 14.4718 1.02577 31
 0 -6 1 13.327 0.71178 4
 -1 6 -1 219.804 4.56145 8
 -1 6 -1 224.377 5.21499 24
 -1 6 -1 225.21 4.62965 12
 -1 6 -1 218.847 5.21858 7
 -1 6 -1 225.545 4.67265 22
 -1 6 -1 227.216 5.04159 10
 -1 6 -1 230.977 5.2861 30
 -1 6 -1 223.15 5.15325 4
 -1 6 -1 225.499 4.41592 25
 -1 6 -1 219.844 5.23954 7
 1 -6 1 220.751 5.09565 3
 1 -6 1 225.696 5.35558 31
 1 -6 1 223.488 5.17431 4
 1 -6 1 217.775 5.62121 2
 1 -6 1 221.113 5.21942 7
 1 -6 1 217.589 5.23341 7
 1 -6 1 215.724 4.60185 12
 1 -6 1 221.428 5.05186 10
 -2 6 -1 33.7841 1.12103 12
 -2 6 -1 31.9352 1.19976 7
 -2 6 -1 32.471 0.91902 25
 -2 6 -1 33.5094 1.20659 7
 -2 6 -1 31.6202 1.12516 10
 -2 6 -1 32.7195 1.39382 30
 -2 6 -1 34.27 1.14383 4
 -2 6 -1 32.2872 0.97822 8
 2 -6 1 32.672 1.06592 12
 2 -6 1 31.9115 1.41596 31
 2 -6 1 32.3017 1.03268 3
 2 -6 1 32.6647 1.22267 7
 2 -6 1 33.3134 1.19641 7
 2 -6 1 32.062 1.19004 10
 2 -6 1 33.6372 0.96627 8
 2 -6 1 33.2675 1.44516 32
 -3 6 -1 51.8668 1.35762 16
 -3 6 -1 53.4507 1.45325 5
 -3 6 -1 54.5008 1.4789 3
 -3 6 -1 53.3733 1.66502 7
 -3 6 -1 53.3114 1.58371 4
 -3 6 -1 52.1804 1.42465 8
 -3 6 -1 54.4219 1.88251 30
 -3 6 -1 52.3394 1.60502 10
 -3 6 -1 52.0273 1.65836 7
 -3 6 -1 55.4469 1.41203 25
 3 -6 1 52.9782 1.64773 10
 3 -6 1 53.6842 1.40452 8
 3 -6 1 52.2291 1.49858 3
 3 -6 1 54.3617 1.9003 32
 3 -6 1 52.5741 1.64639 7
 3 -6 1 53.0422 1.88778 31
 3 -6 1 52.4109 1.31463 22
 3 -6 1 55.0232 1.5134 12
 -4 6 -1 7.52011 0.82972 7
 -4 6 -1 7.08058 0.81445 7
 -4 6 -1 8.38716 0.61199 5
 -4 6 -1 7.69248 0.58974 3
 -4 6 -1 8.54314 0.73892 8
 -4 6 -1 8.35955 0.60169 16
 -4 6 -1 8.15214 0.6858 4
 -4 6 -1 9.17384 0.78691 10
 4 -6 1 7.56224 0.64465 3
 4 -6 1 7.11584 0.8484 7
 4 -6 1 8.14342 0.89045 31
 4 -6 1 9.02411 0.77555 13
 4 -6 1 8.66338 0.75419 12
 4 -6 1 8.25572 0.91377 10
 4 -6 1 8.14296 0.684 33
 4 -6 1 7.92873 0.60967 22
 4 -6 1 8.73611 0.65034 8
 4 -6 1 6.81739 0.61822 7
 4 -6 1 8.60714 0.91668 32
 -5 6 -1 198.565 4.81304 11
 -5 6 -1 203.696 4.85927 10
 -5 6 -1 204.587 4.79999 3
 -5 6 -1 205.542 4.87418 4
 -5 6 -1 199.107 4.78938 5
 -5 6 -1 204.143 4.98518 7
 -5 6 -1 202.415 4.95008 7
 5 -6 1 204.195 4.82491 3
 5 -6 1 184.883 4.19528 33
 5 -6 1 204.333 4.98501 7
 5 -6 1 204.216 4.5511 13
 5 -6 1 200.512 4.39898 8
 5 -6 1 205.19 4.79833 5
 5 -6 1 198.785 4.67184 19
 5 -6 1 200.964 5.11523 32
 5 -6 1 202.877 4.48153 12
 5 -6 1 202.91 4.95346 7
 -6 6 -1 23.6423 1.29323 10
 -6 6 -1 24.3978 1.07957 3
 -6 6 -1 25.2584 1.27534 11
 -6 6 -1 25.857 1.35952 7
 -6 6 -1 24.3955 1.40922 7
 -6 6 -1 25.5449 1.15074 5
 6 -6 1 26.2687 1.13121 5
 6 -6 1 23.7753 1.03946 19
 6 -6 1 24.8171 1.25873 12
 6 -6 1 22.9335 1.36951 7
 6 -6 1 23.364 1.76975 32
 6 -6 1 22.7344 1.13098 8
 6 -6 1 24.4644 1.26092 13
 6 -6 1 24.6808 1.17324 3
 6 -6 1 23.0619 1.33158 7
 -7 6 -1 10.5343 0.97904 28
 -7 6 -1 14.5476 1.43851 7
 -7 6 -1 10.4339 1.09463 10
 -7 6 -1 11.6583 1.22266 11
 -7 6 -1 9.7494 0.97208 7
 -7 6 -1 12.3351 1.28869 21
 -7 6 -1 9.90174 0.95784 3
 -7 6 -1 11.2363 1.13582 5
 7 -6 1 12.3511 1.18794 9
 7 -6 1 13.1842 1.03843 5
 7 -6 1 9.71455 1.06463 3
 7 -6 1 8.71795 1.26813 32
 7 -6 1 12.2822 1.2639 7
 7 -6 1 10.7034 1.04426 8
 7 -6 1 12.6363 1.10614 12
 7 -6 1 8.84916 0.90632 7
 7 -6 1 12.0441 1.28052 13
 -8 6 -1 -0.6158 0.70628 7
 -8 6 -1 -0.5374 0.74332 21
 -8 6 -1 -0.2391 0.57812 3
 -8 6 -1 0.24387 0.73986 28
 -8 6 -1 -0.7944 0.75435 11
 -8 6 -1 0.62542 0.80449 7
 -8 6 -1 -0.338 0.6911 5
 8 -6 1 -0.7955 0.60466 8
 8 -6 1 0.51846 0.81419 13
 8 -6 1 -0.4029 0.5185 12
 8 -6 1 0.11978 0.817 7
 8 -6 1 0.49932 0.74611 9
 8 -6 1 0.23036 1.15499 32
 8 -6 1 -0.0777 0.67407 5
 8 -6 1 -0.0642 0.71473 7
 -9 6 -1 3.35985 0.84595 10
 -9 6 -1 3.5937 1.09196 7
 -9 6 -1 5.43341 1.03709 28
 -9 6 -1 3.60174 0.97301 21
 -9 6 -1 3.49906 0.81377 3
 -9 6 -1 4.62773 1.09425 11
 -9 6 -1 5.55167 1.1083 7
 -9 6 -1 5.09153 0.95863 5
 9 -6 1 3.45804 1.01362 9
 9 -6 1 4.93164 0.8637 12
 9 -6 1 2.10448 1.17531 7
 9 -6 1 5.75343 1.19865 13
 9 -6 1 3.21554 0.93136 5
 9 -6 1 4.3732 0.8544 8
 9 -6 1 4.59311 1.09953 7
 9 -6 1 3.02005 1.43453 32
 8 5 -1 25.8035 1.87758 8
 8 5 -1 24.8589 2.28651 7
 8 5 -1 23.2065 1.7827 7
 8 5 -1 20.5773 2.30969 32
 8 5 -1 21.4314 1.98134 23
 8 5 -1 24.4479 1.93585 11
 8 5 -1 24.4708 1.57458 2
 8 5 -1 20.2428 2.29493 30
 8 5 -1 25.0105 1.4218 5
 -8 -5 1 28.6055 2.09647 7
 -8 -5 1 19.6105 1.77579 24
 -8 -5 1 24.1769 1.71173 4
 -8 -5 1 23.3838 1.44964 3
 -8 -5 1 23.4899 1.88527 9
 -8 -5 1 24.7663 2.40317 31
 -8 -5 1 21.9246 1.86733 7
 -8 -5 1 23.2391 1.98716 13
 7 5 -1 25.6146 1.8372 7
 7 5 -1 22.7676 2.06823 30
 7 5 -1 22.1898 1.61417 23
 7 5 -1 22.6749 1.31605 2
 7 5 -1 23.2918 2.12128 32
 7 5 -1 22.0927 1.58257 11
 7 5 -1 22.8713 1.55272 7
 7 5 -1 19.7816 1.22545 5
 -7 -5 1 26.6603 1.72232 7
 -7 -5 1 17.7619 1.51128 13
 -7 -5 1 18.5538 2.04728 31
 -7 -5 1 22.1454 1.58396 9
 -7 -5 1 20.894 2.08319 24
 -7 -5 1 22.8745 1.40279 4
 -7 -5 1 20.573 1.54145 7
 6 5 -1 46.2626 1.664 23
 6 5 -1 45.0336 2.27203 30
 6 5 -1 46.0861 1.76824 7
 6 5 -1 45.7463 1.9643 7
 6 5 -1 46.8248 2.31105 32
 6 5 -1 45.6134 1.6404 2
 6 5 -1 43.619 1.81161 11
 6 5 -1 44.6697 2.00019 24
 6 5 -1 43.4931 1.64887 5
 -6 -5 1 43.6713 1.46725 18
 -6 -5 1 48.4476 1.94558 7
 -6 -5 1 40.3771 1.70983 9
 -6 -5 1 43.8846 1.61012 4
 -6 -5 1 45.9615 1.80074 7
 -6 -5 1 47.6536 2.14268 24
 -6 -5 1 47.4304 1.80413 13
 -6 -5 1 44.6365 2.3051 31
 5 5 -1 70.381 1.92655 23
 5 5 -1 74.9751 2.29674 7
 5 5 -1 69.4279 2.58371 32
 5 5 -1 70.9185 2.30086 24
 5 5 -1 72.1578 2.09304 2
 5 5 -1 72.0286 2.12731 5
 5 5 -1 60.1799 2.17338 11
 5 5 -1 69.5227 2.15804 7
 5 5 -1 63.8835 2.46946 30
 -5 -5 1 71.7607 2.18049 7
 -5 -5 1 68.5585 2.36018 24
 -5 -5 1 69.0206 2.5728 31
 -5 -5 1 67.4683 1.8954 18
 -5 -5 1 74.3506 2.27036 7
 -5 -5 1 68.085 2.16722 13
 -5 -5 1 65.9508 1.63868 27
 -5 -5 1 70.6272 2.00206 4
 -5 -5 1 74.0166 2.10704 9
 4 5 -1 154.94 3.87511 7
 4 5 -1 142.688 3.98504 32
 4 5 -1 152.888 3.83006 5
 4 5 -1 152.699 3.3799 23
 4 5 -1 149.899 3.94679 2
 4 5 -1 154.944 4.03848 30
 4 5 -1 158.175 3.82935 7
 4 5 -1 153.026 3.80989 24
 4 5 -1 154.105 3.91002 11
 -4 -5 1 150.466 3.65557 4
 -4 -5 1 151.958 3.80915 7
 -4 -5 1 150.913 3.85512 7
 -4 -5 1 151.321 3.84786 24
 -4 -5 1 151.469 4.08642 31
 -4 -5 1 151.395 3.91984 2
 -4 -5 1 148.599 3.66126 9
 -4 -5 1 151.983 3.70098 13
 3 5 -1 27.3409 1.16634 7
 3 5 -1 26.1917 0.90658 12
 3 5 -1 25.3144 0.9963 2
 3 5 -1 24.4151 1.16746 11
 3 5 -1 25.3408 1.33502 30
 3 5 -1 27.8672 1.39224 32
 3 5 -1 27.341 1.23903 24
 3 5 -1 26.2271 0.83756 26
 3 5 -1 26.9862 1.08992 7
 -3 -5 1 27.4196 1.2948 24
 -3 -5 1 24.6972 1.07678 9
 -3 -5 1 24.0157 0.94391 2
 -3 -5 1 27.5435 1.1477 7
 -3 -5 1 25.504 0.82679 20
 -3 -5 1 24.4763 0.95798 4
 -3 -5 1 27.034 1.09217 7
 -3 -5 1 27.3177 1.38581 31
 2 5 -1 349.7 8.01539 7
 2 5 -1 356.747 7.91602 32
 2 5 -1 354.734 7.30933 17
 2 5 -1 359.673 8.05041 7
 2 5 -1 351.659 8.11417 11
 2 5 -1 349.72 8.65598 2
 2 5 -1 363.19 6.92337 26
 2 5 -1 346.142 7.02079 12
 2 5 -1 350.28 7.90085 4
 2 5 -1 352.751 7.84511 24
 2 5 -1 349.172 7.94653 30
 -2 -5 1 353.004 7.86193 24
 -2 -5 1 348.108 7.25327 23
 -2 -5 1 351.614 8.06635 31
 -2 -5 1 361.003 8.05621 7
 -2 -5 1 354.054 7.90839 4
 -2 -5 1 356.209 7.09529 20
 -2 -5 1 351.286 8.00861 7
 -2 -5 1 354.97 8.64726 2
 -2 -5 1 345.414 7.72979 9
 1 5 -1 47.1669 1.61855 30
 1 5 -1 47.4332 1.20287 12
 1 5 -1 47.609 1.55319 24
 1 5 -1 45.6282 1.48974 11
 1 5 -1 46.4221 1.42461 2
 1 5 -1 44.5009 1.30608 4
 1 5 -1 44.9592 1.39106 7
 1 5 -1 47.8946 1.2226 17
 1 5 -1 46.9272 1.43576 7
 -1 -5 1 45.4704 1.40323 2
 -1 -5 1 45.6957 1.58184 24
 -1 -5 1 48.3303 1.17794 12
 -1 -5 1 44.62 1.31847 4
 -1 -5 1 45.3116 1.35746 10
 -1 -5 1 47.0416 1.41572 9
 -1 -5 1 46.2397 1.44176 7
 -1 -5 1 49.6154 1.48036 7
 -1 -5 1 46.3322 1.62935 31
 0 5 -1 95.2555 2.37966 7
 0 5 -1 92.1642 2.26098 10
 0 5 -1 94.2311 2.48927 30
 0 5 -1 91.0707 2.28508 4
 0 5 -1 90.1032 2.04422 12
 0 5 -1 90.4168 2.43717 24
 0 5 -1 90.9519 2.34515 7
 0 5 -1 92.3515 2.00464 8
 0 -5 1 94.7682 2.05523 12
 0 -5 1 90.6798 2.03835 17
 0 -5 1 92.755 2.37 7
 0 -5 1 93.4508 2.51944 31
 0 -5 1 93.6235 2.0203 14
 0 -5 1 91.2068 2.48288 2
 0 -5 1 91.6947 2.29942 4
 0 -5 1 93.12 2.39267 7
 0 -5 1 92.5721 2.2802 10
 -1 5 -1 52.4852 1.63833 30
 -1 5 -1 51.5148 1.63451 24
 -1 5 -1 52.8822 1.18039 25
 -1 5 -1 51.1905 1.29247 22
 -1 5 -1 51.3321 1.50285 7
 -1 5 -1 50.393 1.42921 10
 -1 5 -1 52.4237 1.50088 7
 -1 5 -1 52.388 1.32841 12
 -1 5 -1 50.3317 1.16366 33
 -1 5 -1 50.4571 1.23084 8
 1 -5 1 53.1348 1.69159 31
 1 -5 1 50.3622 1.4487 4
 1 -5 1 51.461 1.48676 7
 1 -5 1 51.1161 1.22475 8
 1 -5 1 51.2259 1.36743 3
 1 -5 1 52.6325 1.31257 12
 1 -5 1 50.6657 1.53399 2
 1 -5 1 52.4547 1.67441 32
 1 -5 1 50.2049 1.46362 10
 -2 5 -1 24.4631 0.96121 7
 -2 5 -1 24.8884 0.96391 7
 -2 5 -1 26.0513 0.77442 25
 -2 5 -1 24.6889 0.79841 8
 -2 5 -1 24.124 0.78492 5
 -2 5 -1 23.6052 0.92935 10
 -2 5 -1 24.2367 0.8086 3
 -2 5 -1 23.5858 0.89007 4
 -2 5 -1 25.5714 1.13053 30
 2 -5 1 25.831 0.98812 7
 2 -5 1 24.9913 0.85366 28
 2 -5 1 24.4168 0.81775 3
 2 -5 1 25.7954 1.17 31
 2 -5 1 22.5963 1.16861 32
 2 -5 1 25.0957 0.96129 7
 2 -5 1 25.3245 0.87957 12
 2 -5 1 23.8487 0.7639 8
 2 -5 1 24.994 0.99315 10
 2 -5 1 24.212 0.76141 22
 -3 5 -1 28.7922 1.08704 10
 -3 5 -1 29.3384 0.87255 16
 -3 5 -1 29.8748 1.11913 7
 -3 5 -1 28.0813 0.93774 8
 -3 5 -1 29.7427 0.91535 5
 -3 5 -1 29.6261 0.9417 3
 3 -5 1 31.4125 0.81112 33
 3 -5 1 28.9719 0.96794 3
 3 -5 1 29.0807 0.86828 22
 3 -5 1 28.502 1.31255 32
 3 -5 1 30.5713 1.32847 31
 3 -5 1 30.0555 0.91877 8
 3 -5 1 28.2367 1.10807 10
 3 -5 1 29.7038 1.02307 12
 3 -5 1 28.8857 1.01294 13
 3 -5 1 29.9416 1.13075 7
 3 -5 1 29.5249 1.11308 7
 -4 5 -1 258.774 5.91971 10
 -4 5 -1 262.56 6.05267 7
 -4 5 -1 254.84 5.4063 8
 -4 5 -1 259.964 5.94854 3
 -4 5 -1 256.43 5.95153 5
 -4 5 -1 259.75 6.07235 7
 4 -5 1 254.779 5.95181 3
 4 -5 1 257.709 5.3981 8
 4 -5 1 258.361 5.57286 13
 4 -5 1 260.763 5.44852 12
 4 -5 1 256.922 5.94656 5
 4 -5 1 260.994 6.05255 7
 4 -5 1 261.41 6.07439 7
 4 -5 1 259.751 6.05975 32
 -5 5 -1 323.365 7.32615 3
 -5 5 -1 303.524 7.25087 28
 -5 5 -1 330.892 7.27855 10
 -5 5 -1 315.928 7.41108 7
 -5 5 -1 315.43 7.29071 11
 -5 5 -1 323.2 7.45883 7
 -5 5 -1 319.158 7.3389 5
 5 -5 1 327.538 7.34259 5
 5 -5 1 322.31 6.64948 8
 5 -5 1 313.933 7.08396 19
 5 -5 1 318.427 7.33227 3
 5 -5 1 311.921 6.83479 13
 5 -5 1 318.95 6.6781 12
 5 -5 1 317.404 7.41644 7
 5 -5 1 319.761 7.44252 7
 5 -5 1 317.064 7.41927 32
 -6 5 -1 116.628 3.16134 7
 -6 5 -1 112.7 2.96258 3
 -6 5 -1 113.532 2.79825 21
 -6 5 -1 112.073 2.99195 11
 -6 5 -1 112.989 3.10007 10
 -6 5 -1 110.296 2.89078 28
 -6 5 -1 116.283 3.15715 7
 -6 5 -1 114.399 2.98417 5
 6 -5 1 117.375 3.16639 7
 6 -5 1 116.695 3.02085 3
 6 -5 1 115.14 3.1658 7
 6 -5 1 114.493 2.79417 8
 6 -5 1 108.53 3.40769 32
 6 -5 1 114.246 2.86148 12
 6 -5 1 114.419 2.89416 13
 6 -5 1 115.709 2.95925 5
 -7 5 -1 3.37753 0.68126 21
 -7 5 -1 2.68022 0.48634 3
 -7 5 -1 2.43533 0.57555 5
 -7 5 -1 2.00663 0.67518 11
 -7 5 -1 1.8194 0.58456 7
 -7 5 -1 3.00169 0.67644 10
 -7 5 -1 1.85515 0.7093 7
 7 -5 1 1.65808 1.00513 32
 7 -5 1 1.37286 0.47839 8
 7 -5 1 2.99199 0.62046 9
 7 -5 1 3.21008 0.55538 5
 7 -5 1 2.00374 0.51775 12
 7 -5 1 3.39451 0.70077 7
 7 -5 1 2.49689 0.69 13
 7 -5 1 2.58071 0.74268 7
 -8 5 -1 6.08366 0.87623 11
 -8 5 -1 4.46104 0.8932 7
 -8 5 -1 4.82948 0.77869 10
 -8 5 -1 5.14768 0.87041 7
 -8 5 -1 4.20831 0.62377 3
 -8 5 -1 4.37933 0.78044 21
 -8 5 -1 4.52101 0.778 5
 8 -5 1 4.97522 0.92385 7
 8 -5 1 5.68642 0.84007 9
 8 -5 1 5.02978 0.75932 5
 8 -5 1 5.91332 0.92568 13
 8 -5 1 3.49751 1.1969 32
 8 -5 1 3.40152 0.66657 8
 8 -5 1 4.77184 0.71237 12
 8 -5 1 6.96916 0.98905 7
 -9 5 -1 16.3262 1.82457 11
 -9 5 -1 16.5354 1.55574 10
 -9 5 -1 12.8478 1.35725 7
 -9 5 -1 14.9301 1.60523 5
 -9 5 -1 14.7585 1.70659 7
 -9 5 -1 13.3862 1.44998 21
 -9 5 -1 17.6536 1.41379 3
 9 -5 1 12.9089 1.16002 12
 9 -5 1 15.4401 1.57294 5
 9 -5 1 11.4915 1.64559 32
 9 -5 1 17.0144 1.82594 7
 9 -5 1 14.7092 1.47023 7
 9 -5 1 14.9004 1.36689 18
 9 -5 1 14.1115 1.32324 13
 9 -5 1 12.1761 1.31341 8
 9 -5 1 12.9636 1.18784 9
 9 4 -1 -0.1738 1.16896 11
 9 4 -1 2.18907 0.82451 2
 9 4 -1 3.90513 1.11691 8
 9 4 -1 1.59552 0.6838 1
 9 4 -1 1.3177 0.95673 7
 9 4 -1 0.70201 1.43556 30
 9 4 -1 1.70029 1.53622 7
 9 4 -1 2.53089 1.41124 23
 9 4 -1 3.00076 1.54532 32
 -9 -4 1 0.10268 1.10191 7
 -9 -4 1 2.06476 0.99302 4
 -9 -4 1 -1.0117 1.1627 13
 -9 -4 1 2.19574 1.12362 7
 -9 -4 1 1.59733 1.47432 31
 -9 -4 1 0.87228 1.55294 24
 -9 -4 1 0.56544 1.1072 9
 8 4 -1 24.8056 1.36835 5
 8 4 -1 28.4975 1.69467 7
 8 4 -1 23.7282 1.85339 11
 8 4 -1 23.1932 1.42104 2
 8 4 -1 21.6513 2.08487 7
 8 4 -1 23.7548 2.32558 30
 8 4 -1 21.5957 2.16927 32
 8 4 -1 23.3653 1.92636 9
 8 4 -1 23.0912 1.69399 8
 8 4 -1 23.3143 2.0082 23
 8 4 -1 24.9543 1.21088 1
 -8 -4 1 24.4595 1.39892 3
 -8 -4 1 25.1183 1.59378 4
 -8 -4 1 28.452 1.87043 7
 -8 -4 1 24.5054 1.84216 13
 -8 -4 1 23.1909 2.21774 31
 -8 -4 1 21.8532 1.96394 7
 -8 -4 1 19.8968 2.0247 11
 -8 -4 1 23.9634 2.35182 24
 -8 -4 1 23.7881 1.70169 9
 7 4 -1 2.95533 0.73652 7
 7 4 -1 1.95319 0.82511 23
 7 4 -1 2.54551 0.78988 9
 7 4 -1 2.56874 0.5652 2
 7 4 -1 2.65025 0.80165 7
 7 4 -1 2.08534 1.05183 30
 7 4 -1 1.06933 0.51152 5
 7 4 -1 2.12114 1.16976 32
 7 4 -1 1.94431 0.71619 11
 -7 -4 1 2.16353 0.82447 11
 -7 -4 1 1.56611 1.08313 31
 -7 -4 1 2.94715 0.70577 13
 -7 -4 1 3.92417 0.78579 7
 -7 -4 1 2.4389 0.71936 9
 -7 -4 1 3.21508 0.63525 4
 -7 -4 1 1.52715 0.9654 24
 -7 -4 1 1.36759 0.69101 7
 6 4 -1 33.4538 1.53354 9
 6 4 -1 34.8943 1.49213 23
 6 4 -1 30.7547 1.95535 32
 6 4 -1 29.5412 1.8896 30
 6 4 -1 35.3932 1.48665 7
 6 4 -1 34.1424 1.64912 7
 6 4 -1 33.7999 1.35164 5
 6 4 -1 32.4781 1.29329 2
 6 4 -1 34.4614 1.54955 11
 -6 -4 1 30.5782 1.1837 18
 -6 -4 1 31.8772 1.47477 13
 -6 -4 1 29.0851 1.72574 24
 -6 -4 1 32.1023 1.58416 7
 -6 -4 1 31.8725 1.90987 31
 -6 -4 1 30.6432 1.64838 11
 -6 -4 1 34.0022 1.32984 4
 -6 -4 1 33.6194 1.50295 7
 -6 -4 1 34.7466 1.438 9
 5 4 -1 28.1234 1.29934 11
 5 4 -1 30.1273 1.38415 7
 5 4 -1 28.7732 1.21708 23
 5 4 -1 27.9255 1.09558 2
 5 4 -1 29.2361 1.18133 5
 5 4 -1 29.0012 1.63996 32
 5 4 -1 29.6481 1.30724 9
 5 4 -1 29.3895 1.64318 30
 5 4 -1 29.632 1.26706 7
 5 4 -1 30.1041 1.40102 24
 -5 -4 1 27.9123 1.27422 7
 -5 -4 1 28.7837 1.45093 11
 -5 -4 1 28.4285 1.46505 24
 -5 -4 1 25.469 1.61451 31
 -5 -4 1 29.2055 1.32179 13
 -5 -4 1 30.1507 1.36004 7
 -5 -4 1 30.5799 1.22383 9
 -5 -4 1 27.7532 1.06086 18
 -5 -4 1 28.2627 1.14058 4
 4 4 -1 30.5645 1.15162 5
 4 4 -1 33.2501 1.2305 7
 4 4 -1 29.7672 1.06894 2
 4 4 -1 29.9422 1.08448 23
 4 4 -1 30.17 1.30002 24
 4 4 -1 30.1077 1.24204 11
 4 4 -1 31.2818 1.23289 9
 4 4 -1 32.3985 1.51407 32
 4 4 -1 28.6483 0.86617 26
 4 4 -1 29.6643 1.46769 30
 4 4 -1 32.1734 1.29552 7
 -4 -4 1 31.7864 1.26825 13
 -4 -4 1 30.7857 1.50356 31
 -4 -4 1 31.3658 1.07491 4
 -4 -4 1 30.638 1.24968 7
 -4 -4 1 31.1927 1.1317 9
 -4 -4 1 29.9767 1.37194 24
 -4 -4 1 29.6352 1.19557 7
 -4 -4 1 30.353 1.32514 11
 3 4 -1 17.8041 0.76919 23
 3 4 -1 19.4067 0.98358 24
 3 4 -1 18.7515 0.95396 7
 3 4 -1 17.2218 0.754 2
 3 4 -1 18.5124 0.65567 26
 3 4 -1 18.6835 1.10957 32
 3 4 -1 18.5309 0.88212 7
 3 4 -1 18.0703 0.92738 11
 3 4 -1 19.4012 1.0943 30
 3 4 -1 17.8391 0.83286 5
 -3 -4 1 18.8231 1.11877 31
 -3 -4 1 17.5606 1.05771 24
 -3 -4 1 18.5625 0.90128 7
 -3 -4 1 18.9554 0.87613 9
 -3 -4 1 18.5173 0.9405 7
 -3 -4 1 18.6474 0.76313 4
 -3 -4 1 17.196 0.71254 2
 2 4 -1 882.69 19.4654 7
 2 4 -1 902.155 17.3891 6
 2 4 -1 877.597 21.2051 2
 2 4 -1 899.129 18.7003 32
 2 4 -1 878.642 19.4488 7
 2 4 -1 924.687 16.9282 26
 2 4 -1 880.79 19.3278 4
 2 4 -1 868.615 19.5218 11
 2 4 -1 870.276 17.1721 12
 2 4 -1 879.084 18.7932 24
 -2 -4 1 905.467 19.1474 31
 -2 -4 1 875.835 19.3284 4
 -2 -4 1 872.578 18.7949 24
 -2 -4 1 881.614 19.4437 7
 -2 -4 1 879.654 21.1932 2
 -2 -4 1 882.774 18.6689 9
 -2 -4 1 875.283 17.7968 23
 -2 -4 1 899.82 17.6243 20
 -2 -4 1 877.134 19.4644 7
 1 4 -1 97.3029 2.13816 17
 1 4 -1 96.7535 2.38568 7
 1 4 -1 95.1209 2.44199 11
 1 4 -1 97.9321 2.52172 2
 1 4 -1 96.4959 2.04773 12
 1 4 -1 100.069 2.48839 30
 1 4 -1 93.2975 2.30545 4
 1 4 -1 95.9115 2.42554 24
 1 4 -1 97.0341 2.40128 7
 -1 -4 1 94.7511 2.40087 7
 -1 -4 1 98.7378 2.3832 7
 -1 -4 1 94.2357 2.50479 2
 -1 -4 1 94.4129 2.29573 10
 -1 -4 1 97.7185 2.51377 31
 -1 -4 1 94.3648 2.42307 24
 -1 -4 1 95.6177 2.31522 4
 0 4 -1 6.99242 0.50598 10
 0 4 -1 8.80842 0.42966 25
 0 4 -1 7.48262 0.6743 30
 0 4 -1 7.73315 0.3921 8
 0 4 -1 6.58673 0.6829 24
 0 4 -1 7.52753 0.55529 7
 0 4 -1 9.5043 0.4844 4
 0 4 -1 6.54521 0.52244 7
 0 4 -1 7.57277 0.44758 12
 0 -4 1 7.0209 0.55286 7
 0 -4 1 7.79162 0.42994 12
 0 -4 1 6.90656 0.42421 17
 0 -4 1 5.82532 0.68002 31
 0 -4 1 7.06699 0.54104 10
 0 -4 1 7.97589 0.50455 4
 0 -4 1 7.08825 0.46936 2
 0 -4 1 8.02052 0.5789 7
 -1 4 -1 21.7944 0.77237 4
 -1 4 -1 21.8307 0.81061 7
 -1 4 -1 22.1406 0.80254 10
 -1 4 -1 22.482 0.72872 12
 -1 4 -1 21.6598 0.69289 22
 -1 4 -1 23.1302 0.63038 25
 -1 4 -1 23.7499 0.95082 30
 -1 4 -1 22.9174 0.83539 7
 -1 4 -1 22.5815 0.64176 8
 1 -4 1 21.5097 0.79796 7
 1 -4 1 22.9294 0.97988 32
 1 -4 1 23.8539 0.98972 31
 1 -4 1 21.7643 0.6308 8
 1 -4 1 22.0162 0.70381 3
 1 -4 1 21.5646 0.7866 4
 1 -4 1 22.4813 0.70738 12
 1 -4 1 23.0735 0.83054 10
 -2 4 -1 2.1913 0.3087 5
 -2 4 -1 2.77329 0.48092 30
 -2 4 -1 2.44621 0.28147 8
 -2 4 -1 2.33881 0.35629 7
 -2 4 -1 2.38572 0.31871 4
 -2 4 -1 1.46189 0.30002 10
 -2 4 -1 2.36346 0.33185 3
 -2 4 -1 1.72306 0.31405 7
 -2 4 -1 1.91873 0.28326 16
 2 -4 1 3.0767 0.52374 31
 2 -4 1 2.93935 0.36856 3
 2 -4 1 2.01794 0.33312 7
 2 -4 1 2.08353 0.25419 8
 2 -4 1 2.6445 0.34754 28
 2 -4 1 1.81488 0.31151 7
 2 -4 1 2.27592 0.26559 22
 2 -4 1 3.78229 0.5532 32
 2 -4 1 1.69296 0.32689 10
 2 -4 1 2.45751 0.33577 12
 -3 4 -1 69.3996 1.85083 7
 -3 4 -1 68.7096 1.64382 8
 -3 4 -1 67.1211 1.71446 5
 -3 4 -1 69.5646 1.52034 16
 -3 4 -1 68.7873 1.83873 10
 -3 4 -1 66.8059 1.74585 3
 -3 4 -1 71.9448 1.62666 29
 3 -4 1 67.4058 1.69289 12
 3 -4 1 70.1352 1.87999 7
 3 -4 1 67.1691 2.00876 31
 3 -4 1 67.5982 1.84739 7
 3 -4 1 67.7641 1.85409 10
 3 -4 1 66.9839 1.70062 13
 3 -4 1 69.2546 1.71552 5
 3 -4 1 64.3861 1.99301 32
 3 -4 1 69.2294 1.76657 3
 3 -4 1 67.9192 1.62347 8
 -4 4 -1 298.191 6.85529 5
 -4 4 -1 301.057 6.93893 7
 -4 4 -1 294.652 6.82303 28
 -4 4 -1 303.492 6.76426 10
 -4 4 -1 296.47 6.80773 11
 -4 4 -1 299.375 6.91025 7
 -4 4 -1 302.338 6.84055 3
 -4 4 -1 320.684 6.1928 29
 -4 4 -1 308.909 6.54309 1
 4 -4 1 297.197 6.64403 19
 4 -4 1 299.258 6.84984 3
 4 -4 1 296.755 6.83757 32
 4 -4 1 299.712 6.85146 5
 4 -4 1 296.445 6.3864 13
 4 -4 1 301.003 6.93144 7
 4 -4 1 295.629 6.90773 7
 4 -4 1 301.402 6.19387 8
 4 -4 1 299.19 6.21308 12
 -5 4 -1 113.1 2.96137 7
 -5 4 -1 108.993 2.95584 7
 -5 4 -1 116.677 2.49353 29
 -5 4 -1 111.111 2.83181 11
 -5 4 -1 110.097 2.81634 5
 -5 4 -1 112.807 2.83756 3
 -5 4 -1 114.702 2.94548 10
 5 -4 1 112.54 3.14744 32
 5 -4 1 112.813 2.97907 7
 5 -4 1 109.422 2.80664 5
 5 -4 1 114.459 2.96206 7
 5 -4 1 112.928 2.85734 3
 5 -4 1 110.298 2.71383 13
 5 -4 1 110.14 2.35639 16
 5 -4 1 110.997 2.63337 8
 -6 4 -1 36.8151 1.32341 21
 -6 4 -1 37.5295 1.54912 7
 -6 4 -1 37.0525 1.40322 11
 -6 4 -1 37.5084 1.21793 29
 -6 4 -1 38.7748 1.41377 13
 -6 4 -1 36.1593 1.52207 10
 -6 4 -1 39.0344 1.35132 3
 -6 4 -1 38.2561 1.50718 7
 -6 4 -1 38.5974 1.38124 5
 6 -4 1 37.9059 1.3757 3
 6 -4 1 37.7005 1.53651 7
 6 -4 1 37.6559 1.3299 5
 6 -4 1 36.384 1.44219 13
 6 -4 1 35.8905 1.87782 32
 6 -4 1 34.8207 1.0225 16
 6 -4 1 38.57 1.33898 8
 6 -4 1 35.6814 1.37083 9
 -7 4 -1 0.88211 0.58061 7
 -7 4 -1 0.69738 0.5394 13
 -7 4 -1 -0.1789 0.59206 7
 -7 4 -1 1.19348 0.57897 11
 -7 4 -1 0.36349 0.49248 5
 -7 4 -1 0.51473 0.42712 3
 -7 4 -1 -0.1101 0.50464 21
 -7 4 -1 -0.1274 0.49218 10
 -7 4 -1 0.25571 0.62465 29
 7 -4 1 0.00218 0.55291 9
 7 -4 1 0.85618 0.60855 13
 7 -4 1 -1.1537 0.84347 32
 7 -4 1 -0.172 0.59355 7
 7 -4 1 -0.1533 0.6043 7
 7 -4 1 0.0467 0.47084 5
 7 -4 1 -0.3259 0.41986 8
 7 -4 1 0.0614 0.37229 16
 -8 4 -1 15.791 1.27676 29
 -8 4 -1 15.8909 1.32897 10
 -8 4 -1 17.5389 1.20879 21
 -8 4 -1 16.5373 1.40933 13
 -8 4 -1 15.3692 1.53909 7
 -8 4 -1 18.7201 1.46204 11
 -8 4 -1 16.3376 1.15783 3
 -8 4 -1 16.5048 1.45657 7
 -8 4 -1 16.2666 1.32481 5
 8 -4 1 15.8876 1.46962 7
 8 -4 1 15.0512 1.58191 13
 8 -4 1 14.7432 1.36274 9
 8 -4 1 15.5567 1.56998 7
 8 -4 1 14.6307 0.87716 16
 8 -4 1 16.7482 1.30394 5
 8 -4 1 18.2586 1.9285 32
 8 -4 1 18.8801 1.1541 8
 -9 4 -1 29.573 2.35339 24
 -9 4 -1 26.5232 2.3159 31
 -9 4 -1 25.1652 2.13942 7
 -9 4 -1 32.2982 1.77304 10
 -9 4 -1 31.7112 2.00972 11
 -9 4 -1 31.34 1.98987 7
 -9 4 -1 32.0338 1.60454 3
 -9 4 -1 33.9738 2.01384 13
 9 -4 1 33.2334 1.86003 9
 9 -4 1 30.9253 1.83727 12
 9 -4 1 32.0392 2.44522 32
 9 -4 1 26.2181 1.12737 16
 9 -4 1 31.5795 1.81048 5
 9 -4 1 29.1173 2.1478 13
 9 -4 1 31.6672 2.00947 7
 9 -4 1 27.9736 1.94762 18
 9 -4 1 31.6763 1.5451 8
 9 -4 1 33.2035 2.19193 7
 9 3 -1 5.21678 1.56003 30
 9 3 -1 3.80823 1.29809 7
 9 3 -1 3.63568 0.84928 2
 9 3 -1 5.74076 1.43497 23
 9 3 -1 4.14783 1.19125 11
 9 3 -1 3.97791 1.1497 9
 9 3 -1 2.15461 1.45016 32
 9 3 -1 4.44019 0.67161 1
 9 3 -1 4.52087 0.97959 8
 9 3 -1 3.73527 0.9735 7
 -9 -3 1 4.96531 1.32676 11
 -9 -3 1 3.7058 0.73976 3
 -9 -3 1 4.2946 1.10679 7
 -9 -3 1 2.49437 1.19278 13
 -9 -3 1 4.54662 0.97764 4
 -9 -3 1 3.54603 1.35984 31
 -9 -3 1 4.78085 1.09757 9
 -9 -3 1 5.0327 1.55806 24
 -9 -3 1 4.18372 1.1456 7
 8 3 -1 0.07075 0.67018 7
 8 3 -1 1.18061 0.50078 5
 8 3 -1 0.19818 0.68887 8
 8 3 -1 0.97328 1.168 32
 8 3 -1 0.92793 0.49431 1
 8 3 -1 0.02876 0.55657 2
 8 3 -1 1.32538 1.22696 30
 8 3 -1 2.23832 1.01077 23
 8 3 -1 0.53503 0.94352 7
 8 3 -1 0.52777 0.82764 9
 8 3 -1 1.2595 0.83162 11
 -8 -3 1 0.74566 0.4923 3
 -8 -3 1 1.52656 1.10748 24
 -8 -3 1 -0.298 0.87539 11
 -8 -3 1 0.28884 0.75915 9
 -8 -3 1 -0.3692 1.05555 31
 -8 -3 1 0.37945 0.85965 7
 -8 -3 1 1.07079 0.83067 13
 -8 -3 1 0.38513 0.71549 4
 -8 -3 1 0.07296 0.7529 7
 7 3 -1 16.7281 1.19186 8
 7 3 -1 13.7267 1.44833 32
 7 3 -1 15.7407 1.44991 23
 7 3 -1 14.4519 1.34099 9
 7 3 -1 14.4891 1.00211 5
 7 3 -1 14.0157 1.23044 7
 7 3 -1 12.2875 1.46075 7
 7 3 -1 15.4213 1.01727 2
 7 3 -1 12.9448 1.41441 30
 7 3 -1 14.9748 1.34974 11
 -7 -3 1 16.3356 1.20758 9
 -7 -3 1 16.1825 1.04829 3
 -7 -3 1 18.3824 1.5455 11
 -7 -3 1 10.0911 1.17979 31
 -7 -3 1 14.0762 1.24654 7
 -7 -3 1 13.1804 1.39074 7
 -7 -3 1 15.5554 1.34281 13
 -7 -3 1 14.0761 1.23173 24
 6 3 -1 66.3364 2.50855 30
 6 3 -1 69.5579 2.22378 11
 6 3 -1 69.9136 2.08771 9
 6 3 -1 67.6099 2.26115 7
 6 3 -1 67.7297 2.56883 32
 6 3 -1 68.6304 2.17271 7
 6 3 -1 67.9405 2.07283 23
 6 3 -1 67.9465 2.10315 5
 6 3 -1 68.1771 2.02691 2
 6 3 -1 64.5889 1.57917 21
 -6 -3 1 68.6347 2.30342 24
 -6 -3 1 69.9397 2.57278 31
 -6 -3 1 69.4153 2.24611 7
 -6 -3 1 62.2259 2.11428 7
 -6 -3 1 72.1728 2.31551 11
 -6 -3 1 67.321 2.10701 13
 -6 -3 1 70.7297 2.03571 9
 5 3 -1 98.9314 2.94558 30
 5 3 -1 97.9457 2.64126 2
 5 3 -1 97.8197 2.72977 11
 5 3 -1 97.4022 2.46543 23
 5 3 -1 98.9941 2.65253 5
 5 3 -1 100.646 2.73573 7
 5 3 -1 99.4171 2.96713 32
 5 3 -1 99.0261 2.56082 9
 5 3 -1 100.753 2.69064 7
 5 3 -1 100.817 2.69291 24
 -5 -3 1 93.4479 2.37781 18
 -5 -3 1 96.6278 2.72857 24
 -5 -3 1 100.218 2.50748 9
 -5 -3 1 99.3249 2.66842 7
 -5 -3 1 95.5438 2.95006 31
 -5 -3 1 100.265 2.79526 11
 -5 -3 1 99.0978 2.58307 13
 -5 -3 1 98.5855 2.72495 7
 4 3 -1 0.57257 0.36381 9
 4 3 -1 0.73305 0.4554 24
 4 3 -1 -0.2096 0.34765 7
 4 3 -1 0.82997 0.41403 11
 4 3 -1 0.66547 0.5391 30
 4 3 -1 0.02636 0.35088 7
 4 3 -1 0.35045 0.26274 5
 4 3 -1 0.46151 0.26157 2
 4 3 -1 0.16952 0.38726 23
 4 3 -1 0.10712 0.55352 32
 -4 -3 1 0.28447 0.30407 4
 -4 -3 1 0.92297 0.45741 11
 -4 -3 1 0.73423 0.50221 31
 -4 -3 1 0.34961 0.38548 7
 -4 -3 1 0.31068 0.30532 18
 -4 -3 1 0.14842 0.38655 7
 -4 -3 1 0.81598 0.3654 13
 -4 -3 1 0.17548 0.31954 9
 -4 -3 1 -0.0338 0.4549 24
 3 3 -1 29.8999 1.10753 7
 3 3 -1 30.6945 1.12688 11
 3 3 -1 27.8205 1.22866 30
 3 3 -1 31.933 0.80941 26
 3 3 -1 30.1281 1.02795 5
 3 3 -1 30.3472 1.05164 9
 3 3 -1 30.6171 1.07629 7
 3 3 -1 30.6127 1.13276 24
 3 3 -1 32.4142 0.96733 2
 3 3 -1 31.7827 0.9835 23
 -3 -3 1 29.5034 1.09026 13
 -3 -3 1 32.7876 1.27343 31
 -3 -3 1 30.6028 1.19119 24
 -3 -3 1 28.9714 1.09654 7
 -3 -3 1 31.0471 0.95857 4
 -3 -3 1 30.9509 1.1753 11
 -3 -3 1 31.5064 1.02926 9
 -3 -3 1 30.8616 0.94702 2
 -3 -3 1 30.469 1.08166 7
 2 3 -1 0.4153 0.1971 2
 2 3 -1 1.09577 0.4223 30
 2 3 -1 0.6916 0.33364 24
 2 3 -1 0.65581 0.25042 23
 2 3 -1 0.37897 0.34437 32
 2 3 -1 0.58831 0.2651 7
 2 3 -1 0.65865 0.31137 11
 2 3 -1 0.61265 0.23745 26
 2 3 -1 0.53665 0.30751 7
 -2 -3 1 0.23663 0.24792 23
 -2 -3 1 0.35023 0.25804 7
 -2 -3 1 0.61562 0.17812 2
 -2 -3 1 0.41476 0.25282 9
 -2 -3 1 0.35758 0.26099 7
 -2 -3 1 -0.0507 0.37 31
 -2 -3 1 0.89975 0.34335 11
 -2 -3 1 0.22195 0.34005 24
 -2 -3 1 0.84523 0.21042 4
 1 3 -1 67.3656 1.70688 7
 1 3 -1 67.0839 1.75735 11
 1 3 -1 67.3681 1.44957 12
 1 3 -1 66.8416 1.56502 17
 1 3 -1 67.3051 1.78215 2
 1 3 -1 66.0093 1.75045 24
 1 3 -1 69.2542 1.73012 7
 1 3 -1 68.4302 1.65389 4
 -1 -3 1 67.7732 1.77567 2
 -1 -3 1 66.2361 1.69527 7
 -1 -3 1 67.4052 1.54912 23
 -1 -3 1 67.1329 1.72634 7
 -1 -3 1 67.29 1.65391 4
 -1 -3 1 68.2315 1.76985 24
 -1 -3 1 71.4949 1.83285 31
 0 3 -1 553.689 12.2298 7
 0 3 -1 548.218 10.8049 12
 0 3 -1 553.876 12.2418 7
 0 3 -1 540.904 12.1705 4
 0 3 -1 593.676 10.7748 25
 0 3 -1 567.032 10.8791 8
 0 3 -1 587.173 11.8798 30
 0 3 -1 543.902 11.8318 24
 0 3 -1 557.94 11.8439 10
 0 -3 1 578.789 12.0298 31
 0 -3 1 552.15 11.16 17
 0 -3 1 552.361 13.3495 2
 0 -3 1 536.984 10.7642 25
 0 -3 1 536.754 12.1714 4
 0 -3 1 548.114 12.226 7
 0 -3 1 546.862 11.8438 10
 0 -3 1 562.722 12.2424 7
 0 -3 1 552.773 10.8046 12
 0 -3 1 552.353 11.84 24
 -1 3 -1 3.36475 0.28625 22
 -1 3 -1 3.97877 0.44468 7
 -1 3 -1 3.84143 0.34386 25
 -1 3 -1 3.92385 0.46655 30
 -1 3 -1 3.75247 0.44448 7
 -1 3 -1 3.17713 0.32001 10
 -1 3 -1 3.44767 0.31932 8
 -1 3 -1 3.97712 0.3419 3
 -1 3 -1 4.26719 0.3998 4
 1 -3 1 4.16417 0.4473 31
 1 -3 1 4.2598 0.33137 3
 1 -3 1 4.1875 0.48735 32
 1 -3 1 4.06558 0.47778 10
 1 -3 1 2.48254 0.28725 7
 1 -3 1 3.98153 0.41296 4
 1 -3 1 4.07241 0.40944 12
 1 -3 1 3.75596 0.30694 8
 1 -3 1 3.52756 0.44042 7
 1 -3 1 3.46314 0.39641 22
 -2 3 -1 10.3659 0.41513 5
 -2 3 -1 10.2951 0.4712 8
 -2 3 -1 10.2408 0.57855 10
 -2 3 -1 10.678 0.44897 16
 -2 3 -1 10.2248 0.57218 7
 -2 3 -1 10.7479 0.51396 29
 -2 3 -1 9.5287 0.58164 7
 -2 3 -1 10.7181 0.5147 4
 -2 3 -1 10.2213 0.4544 3
 2 -3 1 9.66084 0.61216 10
 2 -3 1 11.4236 0.72652 32
 2 -3 1 9.88626 0.57662 7
 2 -3 1 10.108 0.47732 3
 2 -3 1 10.0742 0.68288 31
 2 -3 1 10.1357 0.53665 13
 2 -3 1 9.88641 0.54844 12
 2 -3 1 9.53612 0.54594 7
 2 -3 1 10.1023 0.40526 5
 2 -3 1 10.3653 0.45299 8
 -3 3 -1 23.2928 0.78085 3
 -3 3 -1 23.4645 0.75604 5
 -3 3 -1 24.0736 0.90265 7
 -3 3 -1 23.627 0.80235 11
 -3 3 -1 25.8355 0.75442 29
 -3 3 -1 23.295 0.89596 7
 -3 3 -1 24.0657 0.92419 10
 3 -3 1 23.6849 0.8945 7
 3 -3 1 24.0715 0.77646 8
 3 -3 1 24.092 0.81617 3
 3 -3 1 22.9746 0.83736 13
 3 -3 1 23.4533 0.67038 16
 3 -3 1 25.009 1.08082 32
 3 -3 1 24.066 0.75181 5
 -4 3 -1 261.376 6.09025 7
 -4 3 -1 270.799 5.96858 10
 -4 3 -1 258.91 6.03065 5
 -4 3 -1 262.9 6.07046 7
 -4 3 -1 266.882 6.02193 3
 -4 3 -1 260.709 5.61645 13
 -4 3 -1 260.354 5.96696 11
 -4 3 -1 276.415 5.44117 29
 4 -3 1 263.764 6.02722 5
 4 -3 1 257.763 5.1931 16
 4 -3 1 266.346 5.45871 8
 4 -3 1 260.39 6.06704 7
 4 -3 1 261.892 5.62945 13
 4 -3 1 263.144 6.02562 3
 4 -3 1 258.669 6.01653 32
 4 -3 1 258.187 6.0809 7
 -5 3 -1 108.259 2.7605 11
 -5 3 -1 109.459 2.51922 21
 -5 3 -1 111.776 2.8729 7
 -5 3 -1 111.773 2.86793 10
 -5 3 -1 113.146 2.7917 3
 -5 3 -1 107.484 2.89384 7
 -5 3 -1 109.135 2.47024 29
 -5 3 -1 111.869 2.6559 13
 -5 3 -1 109.169 2.78043 5
 5 -3 1 109.706 2.89886 7
 5 -3 1 107.085 2.32677 16
 5 -3 1 110.001 2.76399 5
 5 -3 1 111.672 2.59011 8
 5 -3 1 106.527 3.0372 32
 5 -3 1 108.522 2.67954 9
 5 -3 1 109.105 2.86684 7
 5 -3 1 109.962 2.67998 13
 5 -3 1 110.81 2.80743 3
 -6 3 -1 67.5713 1.99588 11
 -6 3 -1 68.4938 2.10707 7
 -6 3 -1 68.7781 1.78676 29
 -6 3 -1 71.1332 2.00201 3
 -6 3 -1 67.3016 1.99382 5
 -6 3 -1 67.939 1.77347 21
 -6 3 -1 68.7524 2.13915 7
 -6 3 -1 68.3304 1.95842 13
 -6 3 -1 66.7683 2.08684 10
 6 -3 1 68.9935 2.13785 7
 6 -3 1 67.4675 1.95332 9
 6 -3 1 66.1228 1.96195 5
 6 -3 1 69.6291 2.11283 7
 6 -3 1 69.1929 1.98915 13
 6 -3 1 69.635 2.45728 32
 6 -3 1 67.5445 1.61793 16
 6 -3 1 66.4171 1.8903 8
 -7 3 -1 -0.1023 0.4889 10
 -7 3 -1 0.63635 0.55817 13
 -7 3 -1 0.02111 0.54144 11
 -7 3 -1 -0.3631 0.5287 7
 -7 3 -1 0.31032 0.63355 29
 -7 3 -1 -0.4963 0.47901 21
 -7 3 -1 -0.7348 0.6015 7
 -7 3 -1 -0.2862 0.46949 5
 -7 3 -1 -0.1199 0.37 3
 7 -3 1 -0.128 0.62801 7
 7 -3 1 0.88375 0.58 7
 7 -3 1 -0.3754 0.38819 8
 7 -3 1 0.03909 0.86389 32
 7 -3 1 0.08957 0.41083 16
 7 -3 1 -0.3337 0.43183 5
 7 -3 1 0.07991 0.51893 9
 7 -3 1 0.91382 0.60733 13
 -8 3 -1 18.4615 1.38846 10
 -8 3 -1 18.3359 1.45015 7
 -8 3 -1 21.6955 1.21619 3
 -8 3 -1 19.6127 1.68335 24
 -8 3 -1 16.2584 1.50456 7
 -8 3 -1 17.7016 1.48261 11
 -8 3 -1 18.8864 1.45986 13
 -8 3 -1 15.9996 1.83474 31
 -8 3 -1 16.1215 1.36856 29
 8 -3 1 17.0347 1.01906 16
 8 -3 1 17.032 1.09903 8
 8 -3 1 19.9714 1.28284 5
 8 -3 1 22.7176 1.50569 7
 8 -3 1 19.9092 1.6474 13
 8 -3 1 20.9787 1.93885 32
 8 -3 1 17.5884 1.55982 7
 8 -3 1 17.696 1.38047 18
 8 -3 1 17.0676 1.36267 9
 -9 3 -1 26.4298 1.94829 11
 -9 3 -1 24.6237 2.28661 31
 -9 3 -1 27.3342 1.55064 3
 -9 3 -1 26.4912 2.06556 7
 -9 3 -1 26.0694 1.9219 13
 -9 3 -1 27.0112 2.21886 24
 -9 3 -1 25.6622 1.79634 29
 -9 3 -1 28.3158 1.71548 10
 -9 3 -1 26.808 1.85219 7
 9 -3 1 22.6871 1.78958 9
 9 -3 1 28.4341 1.7338 18
 9 -3 1 25.7086 1.28505 16
 9 -3 1 29.1329 1.88534 7
 9 -3 1 24.5377 2.00182 7
 9 -3 1 24.3054 2.03755 13
 9 -3 1 28.2518 2.39221 32
 9 -3 1 28.9803 1.43727 8
 9 -3 1 26.0693 1.71171 5
 -10 3 -1 10.752 1.64818 24
 -10 3 -1 11.3861 1.67367 15
 -10 3 -1 6.01078 1.50845 7
 -10 3 -1 8.40076 1.64559 31
 -10 3 -1 6.10493 1.38262 13
 -10 3 -1 8.76945 1.37009 7
 -10 3 -1 6.30326 1.41149 11
 10 -3 1 9.49261 1.17391 18
 10 -3 1 6.58307 1.45926 13
 10 -3 1 9.41737 1.26505 5
 10 -3 1 6.72511 1.35611 12
 10 -3 1 7.56102 0.86735 16
 10 -3 1 8.14095 1.28623 9
 10 -3 1 10.3032 1.40888 7
 10 -3 1 7.12163 1.59864 32
 10 -3 1 11.0581 1.6217 7
 9 2 -1 -1.0891 1.22321 23
 9 2 -1 -0.5676 1.02028 11
 9 2 -1 0.31228 0.7782 7
 9 2 -1 0.77188 0.69325 2
 9 2 -1 0.18842 0.80967 8
 9 2 -1 1.26212 1.37847 32
 9 2 -1 0.51176 0.96706 9
 9 2 -1 0.54013 0.54558 5
 9 2 -1 0.36811 0.55598 1
 9 2 -1 0.95355 1.19293 7
 9 2 -1 0.10561 1.29273 30
 -9 -2 1 -0.0691 1.27332 24
 -9 -2 1 0.43661 0.99232 13
 -9 -2 1 0.90563 1.05171 7
 -9 -2 1 0.24958 0.95725 31
 -9 -2 1 1.55623 1.16321 11
 -9 -2 1 0.94375 0.5853 3
 -9 -2 1 -0.4114 1.03222 7
 8 2 -1 2.25804 0.83791 11
 8 2 -1 1.61574 0.78241 9
 8 2 -1 1.54953 0.99409 23
 8 2 -1 1.21547 1.18785 32
 8 2 -1 0.8979 0.64035 8
 8 2 -1 -0.0421 0.47732 5
 8 2 -1 1.34698 0.44189 1
 8 2 -1 2.48176 0.98743 7
 8 2 -1 1.76905 0.72922 7
 8 2 -1 1.55406 0.58318 2
 -8 -2 1 0.05973 0.82671 11
 -8 -2 1 2.31216 1.03138 24
 -8 -2 1 0.9947 0.69948 7
 -8 -2 1 1.98478 0.77908 7
 -8 -2 1 0.52032 0.53055 3
 -8 -2 1 0.54482 0.82226 13
 -8 -2 1 1.52434 0.5378 15
 -8 -2 1 1.00893 0.66932 9
 -8 -2 1 1.4735 1.08949 31
 7 2 -1 64.3952 2.27065 7
 7 2 -1 58.5257 2.5396 32
 7 2 -1 61.5009 1.93908 8
 7 2 -1 58.5487 2.08134 7
 7 2 -1 60.4421 2.00524 9
 7 2 -1 60.2884 1.91974 2
 7 2 -1 60.7242 1.95613 5
 7 2 -1 60.3504 2.16237 11
 7 2 -1 61.1457 1.64114 1
 -7 -2 1 61.0238 2.00288 3
 -7 -2 1 59.253 2.20949 7
 -7 -2 1 60.3621 2.2831 24
 -7 -2 1 59.5877 1.64756 15
 -7 -2 1 58.8596 1.92422 9
 -7 -2 1 63.251 2.13229 7
 -7 -2 1 60.1185 2.07828 13
 -7 -2 1 59.5137 2.5663 31
 -7 -2 1 61.9077 2.27907 11
 6 2 -1 73.2801 2.21231 7
 6 2 -1 64.9904 2.09483 5
 6 2 -1 73.2449 2.28649 7
 6 2 -1 69.848 2.22823 11
 6 2 -1 72.1814 2.07847 2
 6 2 -1 71.8112 2.57055 32
 6 2 -1 70.7708 1.97678 8
 6 2 -1 69.9415 2.05679 9
 -6 -2 1 72.869 2.27078 7
 -6 -2 1 70.799 1.79032 15
 -6 -2 1 68.6728 2.55322 31
 -6 -2 1 72.5844 2.19187 7
 -6 -2 1 74.4982 2.02436 9
 -6 -2 1 76.9238 2.32074 24
 -6 -2 1 71.3158 2.28 11
 -6 -2 1 73.9285 2.13806 13
 5 2 -1 51.4193 1.96617 32
 5 2 -1 51.8343 1.5841 9
 5 2 -1 54.3857 1.58248 2
 5 2 -1 54.4422 1.66974 5
 5 2 -1 54.5446 1.75966 7
 5 2 -1 54.4149 1.73188 11
 5 2 -1 54.5272 1.71078 7
 -5 -2 1 53.4032 1.35118 15
 -5 -2 1 53.653 1.77735 11
 -5 -2 1 53.326 1.63539 13
 -5 -2 1 53.3183 1.73711 7
 -5 -2 1 53.6465 1.70363 7
 -5 -2 1 54.863 1.8028 24
 -5 -2 1 54.9764 1.56138 9
 -5 -2 1 53.0399 1.9802 31
 4 2 -1 6.64881 0.69522 7
 4 2 -1 6.65244 0.45275 2
 4 2 -1 5.73849 0.57621 24
 4 2 -1 6.07887 0.67978 11
 4 2 -1 6.2046 0.62556 9
 4 2 -1 6.41304 0.726 32
 4 2 -1 6.00925 0.63943 7
 4 2 -1 5.15423 0.54387 5
 -4 -2 1 6.16505 0.55804 9
 -4 -2 1 6.30951 0.59617 11
 -4 -2 1 5.83467 0.66518 7
 -4 -2 1 5.46925 0.52673 18
 -4 -2 1 6.43173 0.74235 31
 -4 -2 1 5.86111 0.6934 7
 -4 -2 1 5.91227 0.5897 24
 -4 -2 1 5.87109 0.53361 13
 3 2 -1 67.6517 1.78018 2
 3 2 -1 70.2602 1.48664 26
 3 2 -1 68.6853 1.79435 5
 3 2 -1 66.8435 1.84911 11
 3 2 -1 66.3138 1.78661 7
 3 2 -1 69.1484 1.92901 30
 3 2 -1 70.6778 1.93358 32
 3 2 -1 68.8402 1.67458 23
 3 2 -1 67.7331 1.8157 24
 3 2 -1 68.3809 1.70826 9
 3 2 -1 68.2353 1.82149 7
 -3 -2 1 68.566 1.68481 9
 -3 -2 1 68.933 1.83489 24
 -3 -2 1 70.095 1.95991 31
 -3 -2 1 65.1812 1.80657 7
 -3 -2 1 68.1816 1.75019 13
 -3 -2 1 63.7018 1.84947 11
 -3 -2 1 67.2139 1.66 18
 -3 -2 1 68.0832 1.79333 7
 2 2 -1 131.723 3.202 5
 2 2 -1 137.608 3.13692 24
 2 2 -1 137.408 3.24137 11
 2 2 -1 140.457 3.2069 30
 2 2 -1 135.785 3.35979 2
 2 2 -1 144.143 2.72174 26
 2 2 -1 136.917 3.0545 9
 2 2 -1 136.222 2.92202 23
 2 2 -1 136.217 3.18404 7
 -2 -2 1 133.919 3.14091 24
 -2 -2 1 140.306 3.24255 31
 -2 -2 1 136.057 3.18391 7
 -2 -2 1 134.023 3.03754 9
 -2 -2 1 138.597 3.13277 4
 -2 -2 1 132.718 3.23435 11
 -2 -2 1 134.243 3.19455 7
 -2 -2 1 136.504 3.35518 2
 1 2 -1 775.715 15.4035 30
 1 2 -1 783.466 15.2364 32
 1 2 -1 709.04 15.9566 7
 1 2 -1 729.663 15.3608 24
 1 2 -1 774.907 13.9203 26
 1 2 -1 741.335 14.1197 12
 1 2 -1 719.455 15.9238 7
 1 2 -1 701.337 15.9562 11
 1 2 -1 715.463 17.5555 2
 1 2 -1 717.107 15.8572 4
 -1 -2 1 735.441 15.3634 24
 -1 -2 1 719.493 17.5692 2
 -1 -2 1 710.406 16.0559 7
 -1 -2 1 694.003 15.9561 11
 -1 -2 1 684.478 16.0402 4
 -1 -2 1 753.908 15.5921 31
 -1 -2 1 719.372 15.9244 7
 -1 -2 1 719.666 14.7161 23
 0 2 -1 6.08083 0.34169 25
 0 2 -1 6.56387 0.41142 7
 0 2 -1 6.64058 0.52029 24
 0 2 -1 6.17626 0.41099 7
 0 2 -1 6.03274 0.36104 4
 0 2 -1 7.41442 0.50812 30
 0 2 -1 6.33802 0.41957 10
 0 2 -1 6.72003 0.31412 12
 0 -2 1 6.03756 0.34376 25
 0 -2 1 5.68745 0.37276 17
 0 -2 1 6.5799 0.20377 6
 0 -2 1 6.62135 0.52544 24
 0 -2 1 5.54011 0.41079 10
 0 -2 1 5.89691 0.28989 12
 0 -2 1 6.55048 0.40092 7
 0 -2 1 6.50063 0.42212 7
 0 -2 1 6.67553 0.47228 31
 -1 2 -1 68.6581 1.67471 4
 -1 2 -1 73.9707 1.72491 30
 -1 2 -1 75.6914 1.57586 29
 -1 2 -1 69.5339 1.66846 10
 -1 2 -1 70.5647 1.60821 5
 -1 2 -1 69.428 1.48685 16
 -1 2 -1 68.6001 1.68204 7
 -1 2 -1 69.8475 1.47565 8
 -1 2 -1 69.4711 1.65429 3
 -1 2 -1 69.0713 1.69449 7
 1 -2 1 68.8417 1.67285 10
 1 -2 1 70.4815 1.69366 7
 1 -2 1 68.8106 1.52855 22
 1 -2 1 68.1313 1.67601 4
 1 -2 1 73.7734 1.71859 32
 1 -2 1 71.1625 1.66227 3
 1 -2 1 68.0053 1.68276 7
 1 -2 1 68.8084 1.47162 8
 1 -2 1 73.2408 1.75629 31
 -2 2 -1 7.66948 0.5368 10
 -2 2 -1 6.39964 0.51051 7
 -2 2 -1 7.29114 0.40407 3
 -2 2 -1 5.87701 0.52027 7
 -2 2 -1 7.44737 0.43368 29
 -2 2 -1 7.7253 0.3599 5
 2 -2 1 7.98876 0.70041 32
 2 -2 1 7.69519 0.42738 8
 2 -2 1 7.53615 0.41893 3
 2 -2 1 6.73759 0.52037 7
 2 -2 1 6.87045 0.3841 16
 2 -2 1 7.32689 0.35398 5
 2 -2 1 7.51016 0.49487 13
 2 -2 1 6.13463 0.49555 7
 -3 2 -1 171.024 3.91918 3
 -3 2 -1 164.682 3.96098 7
 -3 2 -1 168.572 3.86282 11
 -3 2 -1 169.23 3.87409 10
 -3 2 -1 172.102 3.95261 7
 -3 2 -1 179.162 3.56365 29
 -3 2 -1 166.642 3.6657 13
 -3 2 -1 168.55 3.90941 5
 3 -2 1 170.889 3.90951 5
 3 -2 1 170.24 3.94914 7
 3 -2 1 165.925 3.38875 16
 3 -2 1 173.372 3.94007 32
 3 -2 1 164.737 3.66682 13
 3 -2 1 169.019 3.5502 8
 3 -2 1 169.483 3.92067 3
 -4 2 -1 212.009 4.91552 7
 -4 2 -1 210.838 4.87747 3
 -4 2 -1 210.524 4.82672 10
 -4 2 -1 221.264 4.43846 29
 -4 2 -1 213.586 4.94915 7
 -4 2 -1 210.224 4.39331 21
 -4 2 -1 208.72 4.8903 5
 -4 2 -1 211.063 4.56802 13
 -4 2 -1 203.207 4.8213 11
 4 -2 1 208.098 4.88212 3
 4 -2 1 215.268 4.93627 32
 4 -2 1 207.299 4.93237 7
 4 -2 1 207.77 4.91298 7
 4 -2 1 206.157 4.42262 8
 4 -2 1 210.68 4.8811 5
 4 -2 1 212.606 4.58688 13
 4 -2 1 208.084 4.66486 9
 -5 2 -1 117.952 2.94507 3
 -5 2 -1 119.683 3.02281 7
 -5 2 -1 115.187 2.9166 11
 -5 2 -1 119.401 3.04705 7
 -5 2 -1 114.283 2.94383 5
 -5 2 -1 116.617 2.79793 13
 -5 2 -1 120.874 2.67926 29
 -5 2 -1 120.047 2.99807 10
 -5 2 -1 117.499 2.60692 21
 5 -2 1 117.044 3.03828 7
 5 -2 1 114.585 2.9185 5
 5 -2 1 116.498 2.72422 8
 5 -2 1 113.492 2.81618 13
 5 -2 1 119.951 3.02307 7
 5 -2 1 113.521 2.81443 9
 5 -2 1 118.069 2.91097 11
 5 -2 1 116.723 3.1799 32
 -6 2 -1 20.7465 1.04153 5
 -6 2 -1 21.3336 1.0875 13
 -6 2 -1 18.6512 0.89232 21
 -6 2 -1 20.9505 1.15803 7
 -6 2 -1 21.9428 1.07351 29
 -6 2 -1 22.6218 1.17524 10
 -6 2 -1 19.0476 1.09379 11
 -6 2 -1 21.041 1.16239 7
 -6 2 -1 21.0008 0.97089 3
 6 -2 1 19.9774 1.15443 13
 6 -2 1 21.0127 0.9859 8
 6 -2 1 19.7662 1.0411 11
 6 -2 1 20.5792 1.06465 9
 6 -2 1 21.139 1.15646 7
 6 -2 1 21.1364 1.15804 7
 6 -2 1 18.6307 1.50891 32
 6 -2 1 19.9025 0.97157 5
 -7 2 -1 19.8302 1.28558 7
 -7 2 -1 18.3381 1.35702 24
 -7 2 -1 17.0231 1.24968 29
 -7 2 -1 16.7706 1.25918 10
 -7 2 -1 16.577 1.57266 31
 -7 2 -1 15.1529 1.27922 7
 -7 2 -1 17.2082 1.22212 13
 -7 2 -1 18.0951 1.24322 11
 -7 2 -1 17.6107 1.0292 3
 7 -2 1 18.3489 1.05089 8
 7 -2 1 16.7639 1.04992 5
 7 -2 1 18.6301 1.29 7
 7 -2 1 15.2773 1.63139 32
 7 -2 1 16.7004 1.09481 18
 7 -2 1 21.046 1.28875 7
 7 -2 1 18.0521 1.32177 13
 7 -2 1 18.4002 1.17456 9
 -8 2 -1 20.6588 1.19257 3
 -8 2 -1 20.9012 1.47906 13
 -8 2 -1 21.8968 1.51383 7
 -8 2 -1 23.7144 1.44976 10
 -8 2 -1 20.0736 1.94056 31
 -8 2 -1 21.9059 1.53068 11
 -8 2 -1 20.9472 1.57609 7
 -8 2 -1 19.3834 1.71652 24
 -8 2 -1 21.5432 1.54442 29
 8 -2 1 20.6746 1.57171 7
 8 -2 1 20.2311 1.28287 5
 8 -2 1 19.4536 1.41506 9
 8 -2 1 19.6095 1.20372 8
 8 -2 1 19.5899 1.64968 13
 8 -2 1 22.4436 1.30146 18
 8 -2 1 21.3795 1.46524 7
 8 -2 1 20.0685 1.97945 32
 -9 2 -1 10.9217 1.54875 31
 -9 2 -1 11.5015 1.24231 11
 -9 2 -1 20.2955 1.99116 15
 -9 2 -1 11.3968 1.25697 7
 -9 2 -1 13.2693 1.25371 7
 -9 2 -1 11.6513 1.16292 13
 -9 2 -1 14.4613 1.5553 10
 -9 2 -1 12.1808 1.19432 3
 -9 2 -1 12.4781 1.32825 24
 -9 2 -1 14.7583 1.3182 29
 9 -2 1 13.7795 1.44298 5
 9 -2 1 12.8588 1.14224 9
 9 -2 1 14.4918 1.28036 8
 9 -2 1 11.6005 1.28589 13
 9 -2 1 15.4607 1.38457 18
 9 -2 1 12.3688 1.24247 7
 9 -2 1 9.8336 1.58905 32
 9 -2 1 13.3413 1.32875 7
 -10 2 -1 8.59289 1.40826 11
 -10 2 -1 5.10029 1.56221 31
 -10 2 -1 7.03357 1.55419 15
 -10 2 -1 8.8347 1.5072 7
 -10 2 -1 6.05687 1.23036 7
 -10 2 -1 7.08187 1.61093 24
 -10 2 -1 4.79036 1.33236 13
 -10 2 -1 6.8658 1.42017 29
 10 -2 1 9.4742 1.62018 7
 10 -2 1 6.0499 1.57385 32
 10 -2 1 3.15161 1.12087 5
 10 -2 1 5.52104 0.97692 16
 10 -2 1 5.62875 1.42711 13
 10 -2 1 5.64434 1.249 9
 10 -2 1 6.81197 1.33456 7
 9 1 -1 2.27547 0.73928 2
 9 1 -1 2.04774 1.08957 11
 9 1 -1 2.29461 1.25283 7
 9 1 -1 2.52176 0.93863 9
 9 1 -1 2.4888 0.75923 8
 9 1 -1 1.6825 0.61226 5
 9 1 -1 3.65265 0.88748 7
 9 1 -1 2.67026 1.35971 32
 -9 -1 1 5.32453 1.28781 24
 -9 -1 1 2.10992 1.10592 11
 -9 -1 1 0.9615 0.90961 7
 -9 -1 1 1.92244 1.02696 13
 -9 -1 1 3.81808 0.94053 7
 -9 -1 1 2.35048 0.79506 15
 -9 -1 1 3.38884 1.30619 31
 -9 -1 1 2.88205 0.98383 19
 -9 -1 1 2.63102 0.62006 3
 8 1 -1 6.06635 0.84651 9
 8 1 -1 6.43596 0.68384 1
 8 1 -1 5.27085 0.79304 7
 8 1 -1 6.22789 0.67083 2
 8 1 -1 8.44806 0.93055 5
 8 1 -1 4.66607 1.2373 32
 8 1 -1 7.60197 0.99111 11
 8 1 -1 4.88187 0.95883 7
 8 1 -1 7.57795 0.82179 8
 -8 -1 1 5.79501 0.86475 13
 -8 -1 1 6.66327 0.71381 3
 -8 -1 1 7.64905 0.94935 7
 -8 -1 1 3.67624 1.08124 31
 -8 -1 1 6.22436 1.13419 24
 -8 -1 1 6.55767 1.02488 7
 -8 -1 1 6.55881 0.73611 15
 -8 -1 1 5.97216 1.00514 11
 7 1 -1 55.5835 2.11389 7
 7 1 -1 53.6524 1.92718 7
 7 1 -1 56.3096 1.82386 5
 7 1 -1 51.6636 2.37864 32
 7 1 -1 54.4034 1.45609 1
 7 1 -1 54.5056 1.99079 11
 7 1 -1 53.9178 1.76938 2
 7 1 -1 57.3994 1.76551 8
 7 1 -1 54.6611 1.81546 9
 -7 -1 1 54.8645 2.39543 31
 -7 -1 1 49.8837 1.91594 13
 -7 -1 1 55.5259 1.76908 9
 -7 -1 1 56.6475 1.83364 3
 -7 -1 1 55.5273 1.67988 15
 -7 -1 1 56.1256 1.97237 7
 -7 -1 1 54.6898 2.17075 24
 -7 -1 1 54.761 2.0699 11
 -7 -1 1 56.6642 2.04982 7
 6 1 -1 3.34284 0.55619 11
 6 1 -1 3.82978 0.82321 32
 6 1 -1 3.3764 0.4983 5
 6 1 -1 2.97569 0.53501 7
 6 1 -1 3.68779 0.52443 9
 6 1 -1 3.21163 0.6145 7
 6 1 -1 4.87846 0.56097 8
 6 1 -1 3.62277 0.4275 2
 6 1 -1 3.75676 0.44492 1
 -6 -1 1 3.20815 0.58009 13
 -6 -1 1 3.18127 0.46882 15
 -6 -1 1 3.29217 0.64942 7
 -6 -1 1 2.42532 0.49641 7
 -6 -1 1 2.95747 0.68818 24
 -6 -1 1 3.52984 0.50564 3
 -6 -1 1 3.23226 0.81186 31
 -6 -1 1 3.01485 0.59363 11
 -6 -1 1 3.33576 0.48601 9
 5 1 -1 0.58675 0.27604 2
 5 1 -1 0.16026 0.46088 7
 5 1 -1 0.75201 0.62816 32
 5 1 -1 0.83739 0.23465 1
 5 1 -1 0.23132 0.40888 11
 5 1 -1 0.98159 0.42292 7
 5 1 -1 0.0039 0.35435 9
 5 1 -1 0.87643 0.30973 5
 5 1 -1 1.03742 0.34179 8
 -5 -1 1 0.23271 0.49775 24
 -5 -1 1 0.37553 0.40447 7
 -5 -1 1 0.28067 0.44013 7
 -5 -1 1 0.96626 0.3697 13
 -5 -1 1 0.58091 0.5387 31
 -5 -1 1 0.1424 0.39386 11
 -5 -1 1 0.69494 0.33351 9
 4 1 -1 10.0829 0.69899 7
 4 1 -1 10.6975 0.52622 2
 4 1 -1 9.95205 0.7164 11
 4 1 -1 10.8803 0.64832 9
 4 1 -1 10.8078 0.92129 32
 4 1 -1 9.40265 0.63342 5
 -4 -1 1 11.1347 0.73505 7
 -4 -1 1 11.2277 0.79979 11
 -4 -1 1 9.44101 0.68282 5
 -4 -1 1 10.2659 0.68666 13
 -4 -1 1 10.8526 0.70447 7
 -4 -1 1 10.7071 0.82869 24
 -4 -1 1 11.0171 0.60196 9
 3 1 -1 454.808 10.0895 5
 3 1 -1 443.637 9.48709 9
 3 1 -1 453.863 9.99033 7
 3 1 -1 471.523 9.66812 32
 3 1 -1 453.195 10.7718 2
 3 1 -1 437.04 9.9544 7
 3 1 -1 451.122 10.012 11
 -3 -1 1 447.35 9.9627 7
 -3 -1 1 447.559 9.98139 7
 -3 -1 1 445.354 9.27653 13
 -3 -1 1 442.038 9.57043 18
 -3 -1 1 450.887 9.86947 31
 -3 -1 1 453.339 9.4863 9
 -3 -1 1 438.359 9.63276 24
 -3 -1 1 450.158 10.0934 5
 -3 -1 1 439.459 10.0095 11
 2 1 -1 1.75538 0.30212 11
 2 1 -1 2.67909 0.26612 26
 2 1 -1 1.67387 0.23529 9
 2 1 -1 1.43722 0.35241 32
 2 1 -1 1.83879 0.25008 5
 2 1 -1 2.15835 0.30176 7
 2 1 -1 2.10695 0.22544 2
 2 1 -1 1.73687 0.2557 7
 2 1 -1 2.08299 0.3444 24
 -2 -1 1 1.43217 0.2593 7
 -2 -1 1 2.31518 0.35355 24
 -2 -1 1 2.42271 0.38707 31
 -2 -1 1 2.06094 0.2841 7
 -2 -1 1 1.91223 0.29458 13
 -2 -1 1 1.51006 0.24465 18
 -2 -1 1 1.57862 0.23383 5
 -2 -1 1 1.77485 0.22246 9
 -2 -1 1 2.58397 0.34369 11
 1 1 -1 558.052 10.0251 26
 1 1 -1 515.154 11.4512 7
 1 1 -1 506.366 11.6908 5
 1 1 -1 528.461 10.5527 23
 1 1 -1 554.758 10.9454 32
 1 1 -1 498.566 11.4713 7
 1 1 -1 550.151 11.0723 30
 1 1 -1 557.603 10.2369 27
 -1 -1 1 510.779 11.4429 7
 -1 -1 1 520.666 11.4908 11
 -1 -1 1 540.644 11.2112 31
 -1 -1 1 503.469 11.7281 5
 -1 -1 1 501.212 12.5802 2
 -1 -1 1 527.741 11.0561 24
 -1 -1 1 526.581 10.9638 9
 -1 -1 1 523.061 10.5513 23
 -1 -1 1 488.826 11.5129 7
 0 -1 1 305.898 5.92 6
 0 -1 1 291.224 6.56313 7
 0 -1 1 312.338 6.34207 24
 0 -1 1 284.76 6.65552 4
 0 -1 1 305.057 6.56525 11
 -1 1 -1 6.9643 0.33892 27
 -1 1 -1 5.57139 0.23019 5
 -1 1 -1 6.65776 0.33586 7
 -1 1 -1 6.59529 0.3249 29
 -1 1 -1 6.61567 0.30014 16
 -1 1 -1 6.24549 0.29294 4
 -1 1 -1 6.1856 0.33806 13
 -1 1 -1 5.996 0.35637 10
 -1 1 -1 6.3381 0.3243 7
 1 -1 1 5.8341 0.22128 5
 1 -1 1 6.10751 0.2872 3
 1 -1 1 6.14171 0.31219 7
 1 -1 1 6.4902 0.30468 16
 1 -1 1 7.41306 0.40499 32
 1 -1 1 6.43231 0.33842 13
 -2 1 -1 84.9196 1.97356 11
 -2 1 -1 86.1348 2.02891 3
 -2 1 -1 86.4004 1.85388 21
 -2 1 -1 85.2641 2.01095 5
 -2 1 -1 90.674 1.86976 29
 -2 1 -1 84.5355 2.04569 7
 -2 1 -1 84.7551 1.92219 13
 -2 1 -1 83.6699 2.05828 7
 -2 1 -1 83.91 2.01033 10
 2 -1 1 81.9317 2.04158 7
 2 -1 1 85.2177 2.00437 5
 2 -1 1 84.0563 1.92493 13
 2 -1 1 88.4014 2.07354 32
 2 -1 1 85.4934 1.97281 11
 -3 1 -1 309.468 6.11613 29
 -3 1 -1 298.148 6.69875 7
 -3 1 -1 293.773 6.21936 13
 -3 1 -1 298.149 6.7114 5
 -3 1 -1 292.242 6.666 3
 -3 1 -1 291.553 6.50324 10
 -3 1 -1 294.161 6.61473 11
 -3 1 -1 300.313 6.02096 21
 -3 1 -1 299.563 6.67992 7
 3 -1 1 295.794 6.69781 7
 3 -1 1 298.66 6.61495 11
 3 -1 1 296.71 6.70345 5
 3 -1 1 290.595 6.21829 13
 3 -1 1 309.361 6.53909 32
 3 -1 1 289.988 6.6677 3
 3 -1 1 289.918 6.37057 9
 3 -1 1 296.365 6.67624 7
 -4 1 -1 211.512 4.91459 5
 -4 1 -1 213.928 4.94802 7
 -4 1 -1 206.196 4.62578 19
 -4 1 -1 214.615 4.92067 7
 -4 1 -1 207.924 4.84885 11
 -4 1 -1 206.193 4.87786 3
 -4 1 -1 214.422 4.60018 13
 -4 1 -1 215.265 4.48896 29
 -4 1 -1 208.273 4.35993 21
 4 -1 1 212.809 4.60707 13
 4 -1 1 210.91 4.92165 32
 4 -1 1 211.462 4.91546 7
 4 -1 1 210.741 4.6725 9
 4 -1 1 209.98 4.93228 7
 4 -1 1 207.805 4.89692 5
 4 -1 1 210.901 4.84437 11
 -5 1 -1 0.73343 0.29895 3
 -5 1 -1 0.43619 0.33992 7
 -5 1 -1 0.59691 0.35371 5
 -5 1 -1 0.53685 0.25331 19
 -5 1 -1 0.72828 0.48568 29
 -5 1 -1 0.45864 0.39892 11
 -5 1 -1 0.28108 0.37419 7
 -5 1 -1 0.78448 0.54608 31
 5 -1 1 0.36669 0.34739 11
 5 -1 1 0.56502 0.3491 8
 5 -1 1 0.90757 0.5918 32
 5 -1 1 1.27221 0.39724 7
 5 -1 1 0.2104 0.28657 5
 5 -1 1 0.40865 0.41103 7
 5 -1 1 0.65792 0.40661 13
 5 -1 1 0.47016 0.3716 9
 -6 1 -1 0.5824 0.52993 7
 -6 1 -1 0.96012 0.5128 11
 -6 1 -1 0.53289 0.30997 19
 -6 1 -1 0.67831 0.70409 31
 -6 1 -1 0.42228 0.49887 7
 -6 1 -1 0.56191 0.57746 29
 -6 1 -1 0.57831 0.52154 24
 -6 1 -1 1.34092 0.49445 13
 -6 1 -1 0.22931 0.32676 3
 6 -1 1 0.74872 0.77786 32
 6 -1 1 0.73238 0.4421 9
 6 -1 1 0.05041 0.47337 7
 6 -1 1 1.25569 0.52764 7
 6 -1 1 0.60426 0.39141 18
 6 -1 1 0.11612 0.43291 11
 6 -1 1 -0.6137 0.31302 5
 6 -1 1 1.07838 0.4193 8
 6 -1 1 0.31433 0.52878 13
 -7 1 -1 -0.3097 0.58199 11
 -7 1 -1 -0.5741 0.74343 31
 -7 1 -1 -0.0145 0.66934 24
 -7 1 -1 -0.7574 0.36915 3
 -7 1 -1 -0.5116 0.58569 7
 -7 1 -1 -0.7188 0.52901 7
 -7 1 -1 -0.6096 0.52327 13
 -7 1 -1 -0.3109 0.34421 19
 -7 1 -1 -1.0369 0.49772 10
 -7 1 -1 -1.0576 0.69187 29
 7 -1 1 -0.1425 0.46067 18
 7 -1 1 0.11258 0.43275 5
 7 -1 1 -0.9213 0.84203 32
 7 -1 1 -0.4926 0.62805 13
 7 -1 1 -1.0543 0.52108 9
 7 -1 1 -0.4306 0.55069 11
 7 -1 1 -0.2553 0.43889 8
 7 -1 1 0.06828 0.54435 7
 7 -1 1 -0.733 0.59209 7
 -8 1 -1 7.43354 1.26142 31
 -8 1 -1 6.82641 0.84826 10
 -8 1 -1 5.59307 0.59956 3
 -8 1 -1 6.83884 0.97799 7
 -8 1 -1 7.79431 0.96095 15
 -8 1 -1 6.73943 0.88587 7
 -8 1 -1 6.66344 0.93316 11
 -8 1 -1 6.79271 0.98677 24
 -8 1 -1 7.25403 1.06325 29
 -8 1 -1 5.23853 0.82841 13
 8 -1 1 7.21643 0.74832 8
 8 -1 1 6.16438 0.96671 13
 8 -1 1 8.63061 0.97883 7
 8 -1 1 8.35286 0.94959 11
 8 -1 1 7.72096 1.05506 7
 8 -1 1 5.18733 0.69922 5
 8 -1 1 7.82553 0.8634 9
 8 -1 1 5.97532 1.24449 32
 8 -1 1 7.14382 0.66694 18
 -9 1 -1 6.25099 1.24709 29
 -9 1 -1 4.12442 1.00298 7
 -9 1 -1 4.42154 0.63642 3
 -9 1 -1 7.4004 1.03505 10
 -9 1 -1 6.1069 1.22035 24
 -9 1 -1 6.17425 0.94251 7
 -9 1 -1 5.99138 1.09856 15
 -9 1 -1 6.7928 1.09133 11
 -9 1 -1 4.91897 1.33749 31
 -9 1 -1 6.87984 1.05637 13
 9 -1 1 3.45847 1.39678 32
 9 -1 1 4.67854 0.85795 5
 9 -1 1 4.7975 1.10466 13
 9 -1 1 4.99027 1.00337 9
 9 -1 1 5.814 1.16238 7
 9 -1 1 6.12835 1.008 7
 9 -1 1 6.05817 0.76714 8
 9 -1 1 5.80386 1.09917 11
 -10 1 -1 2.18176 1.37941 13
 -10 1 -1 3.54123 1.35202 15
 -10 1 -1 1.56723 1.33431 7
 -10 1 -1 1.151 1.58113 24
 -10 1 -1 3.40822 1.46169 31
 -10 1 -1 2.39573 1.20679 7
 -10 1 -1 2.93618 1.32885 11
 10 -1 1 2.292 1.21726 9
 10 -1 1 1.76014 1.53889 32
 10 -1 1 2.36831 0.9954 5
 10 -1 1 3.05042 1.26328 7
 10 -1 1 4.41086 1.45975 7
 9 0 -1 -0.0216 0.76618 7
 9 0 -1 2.40882 1.02994 11
 9 0 -1 0.17592 1.25959 32
 9 0 -1 0.20619 0.65832 2
 9 0 -1 1.39394 0.86406 9
 9 0 -1 0.68202 0.68432 8
 9 0 -1 0.86123 1.04883 7
 9 0 -1 2.20057 0.68975 5
 -9 0 1 1.28428 0.901 7
 -9 0 1 -0.3833 0.97585 13
 -9 0 1 -0.6531 1.19366 24
 -9 0 1 0.52576 0.83555 15
 -9 0 1 0.96543 0.58479 3
 -9 0 1 1.7509 0.89262 19
 -9 0 1 1.3286 1.04647 31
 -9 0 1 0.84197 0.92914 11
 -9 0 1 1.52758 0.82038 7
 8 0 -1 3.97785 0.97128 7
 8 0 -1 3.93924 0.66087 8
 8 0 -1 2.489 0.81706 11
 8 0 -1 3.18826 0.62147 5
 8 0 -1 3.30181 0.69477 7
 8 0 -1 3.42947 0.61085 2
 8 0 -1 2.90556 0.72149 9
 8 0 -1 2.40202 1.07657 32
 -8 0 1 3.51811 0.75924 19
 -8 0 1 2.14135 0.68419 7
 -8 0 1 3.29063 0.87625 7
 -8 0 1 3.98337 0.74525 15
 -8 0 1 2.33332 1.09104 31
 -8 0 1 3.41837 0.89032 11
 -8 0 1 4.11197 1.03527 24
 -8 0 1 2.84257 0.79347 13
 -8 0 1 3.11697 0.58045 3
 7 0 -1 43.0625 1.82534 7
 7 0 -1 39.7385 1.62916 7
 7 0 -1 38.6611 1.49433 9
 7 0 -1 40.5439 2.10192 32
 7 0 -1 40.9395 1.68684 11
 7 0 -1 41.0668 1.51075 5
 7 0 -1 43.1012 1.50561 8
 7 0 -1 41.0157 1.10137 1
 -7 0 1 40.1083 2.06222 31
 -7 0 1 42.6571 1.51535 3
 -7 0 1 38.1776 1.51442 19
 -7 0 1 39.7853 1.8466 24
 -7 0 1 40.1423 1.76403 11
 -7 0 1 40.332 1.57259 13
 -7 0 1 37.7392 1.71016 7
 -7 0 1 41.1995 1.65429 7
 6 0 -1 7.49463 0.73552 7
 6 0 -1 7.39083 0.81626 18
 6 0 -1 9.09055 0.71665 5
 6 0 -1 7.71711 0.75496 8
 6 0 -1 7.56683 0.87613 11
 6 0 -1 8.48862 1.04652 32
 6 0 -1 8.80337 0.87626 7
 6 0 -1 7.79503 0.45731 1
 6 0 -1 7.81017 0.80106 9
 -6 0 1 7.65384 0.8451 5
 -6 0 1 8.48452 0.91971 13
 -6 0 1 8.61413 0.8302 24
 -6 0 1 6.37263 0.84033 31
 -6 0 1 6.89866 0.70888 11
 -6 0 1 7.74852 0.86297 7
 -6 0 1 8.11345 0.94643 7
 -6 0 1 6.83138 0.71484 3
 5 0 -1 199.195 4.47297 13
 5 0 -1 201.661 4.7821 7
 5 0 -1 195.771 4.78796 11
 5 0 -1 201.591 4.46483 9
 5 0 -1 202.976 4.32818 8
 5 0 -1 200.927 4.51539 18
 5 0 -1 202.058 4.4418 1
 5 0 -1 205.994 4.83354 7
 5 0 -1 198.506 4.79183 5
 5 0 -1 197.446 4.85821 32
 -5 0 1 200.181 4.77817 7
 -5 0 1 201.733 4.81454 7
 -5 0 1 200.522 4.74396 3
 -5 0 1 194.964 4.67836 24
 -5 0 1 199.041 4.94352 31
 -5 0 1 198.669 4.81425 11
 -5 0 1 202.802 4.82035 5
 -5 0 1 200.184 4.44746 13
 -5 0 1 201.787 4.45253 9
 4 0 -1 45.9971 1.31584 13
 4 0 -1 42.762 1.30558 5
 4 0 -1 44.9999 1.09705 1
 4 0 -1 45.1126 1.25994 18
 4 0 -1 42.486 1.36942 11
 4 0 -1 44.0906 1.20189 9
 4 0 -1 46.5402 1.37239 7
 4 0 -1 47.7295 1.57701 32
 4 0 -1 44.7711 1.24274 8
 4 0 -1 44.118 1.39514 7
 -4 0 1 44.5367 1.41032 24
 -4 0 1 45.9818 1.37465 7
 -4 0 1 43.8127 1.40152 11
 -4 0 1 43.9524 1.18813 9
 -4 0 1 43.0415 1.33105 5
 -4 0 1 44.3005 1.28469 13
 3 0 -1 16.7479 0.7326 7
 3 0 -1 16.8833 0.68732 13
 3 0 -1 17.0108 0.71385 11
 3 0 -1 17.1873 0.58557 9
 3 0 -1 16.5257 0.69854 7
 3 0 -1 17.2426 0.64589 8
 3 0 -1 18.2964 0.85593 32
 3 0 -1 16.5634 0.65343 18
 3 0 -1 17.8498 0.48875 1
 -3 0 1 16.7802 0.77096 24
 -3 0 1 16.5639 0.72442 7
 -3 0 1 15.9497 0.55531 9
 -3 0 1 16.9712 0.65671 13
 -3 0 1 17.6156 0.70868 7
 -3 0 1 16.2379 0.67147 5
 2 0 -1 41.8081 0.85843 27
 2 0 -1 38.2214 1.00723 13
 2 0 -1 38.8541 0.94132 9
 2 0 -1 40.1308 0.93885 1
 2 0 -1 37.2595 1.05332 5
 2 0 -1 38.2214 1.09518 11
 2 0 -1 39.9767 1.14552 32
 2 0 -1 39.2141 0.97538 8
 2 0 -1 40.2532 0.95898 26
 2 0 -1 39.0611 1.06686 7
 2 0 -1 38.4095 1.03378 18
 -2 0 1 37.9088 1.03133 18
 -2 0 1 42.4442 1.15553 31
 -2 0 1 37.9409 1.05286 7
 -2 0 1 38.9883 0.93991 9
 -2 0 1 38.5954 1.0806 7
 -2 0 1 37.9461 0.99112 13
 1 0 -1 206.683 4.75427 5
 1 0 -1 221.83 4.62608 1
 1 0 -1 222.593 4.13826 26
 1 0 -1 208.697 4.55917 18
 1 0 -1 207.589 4.21038 8
 1 0 -1 222.431 4.18955 27
 1 0 -1 205.868 4.68207 7
 1 0 -1 218.537 4.50152 32
 1 0 -1 207.745 4.71991 11
 1 0 -1 213.986 4.68966 7
 1 0 -1 208.458 4.1538 12
 -1 0 1 215.702 4.44224 9
 -1 0 1 206.721 4.72034 11
 -1 0 1 214.462 4.21207 8
 -1 0 1 205.351 4.55745 18
 -1 0 1 226.174 4.61123 31
 -1 0 1 205.386 4.6884 7
 -1 0 1 224.879 4.62717 1
 -1 0 1 213.255 4.22457 21
 -1 0 1 210.96 4.68164 7
 -1 0 1 204.53 4.75173 5
 -1 0 -1 100.891 2.39647 21
 -1 0 -1 100.878 2.60769 7
 -1 0 -1 110.99 2.35578 27
 -1 0 -1 99.059 2.61503 3
 -1 0 -1 95.1492 2.58858 11
 -1 0 -1 99.078 2.61503 7
 -1 0 -1 99.2431 2.53739 10
 -1 0 -1 112.187 2.53675 1
 -1 0 -1 99.4712 2.45648 13
 -1 0 -1 103.718 2.6126 15
 1 0 1 113.254 2.53575 1
 1 0 1 100.055 2.5211 9
 1 0 1 99.2779 2.61393 3
 1 0 1 100.397 2.58108 11
 1 0 1 102.511 2.60885 7
 1 0 1 100.474 2.45831 13
 1 0 1 104.749 2.61768 7
 1 0 1 108.565 2.5437 32
 1 0 1 100.171 2.39484 21
 -2 0 -1 1743.14 35.7419 13
 -2 0 -1 1928.35 34.3171 27
 -2 0 -1 1828.81 37.2047 31
 -2 0 -1 1710.02 38.6499 3
 -2 0 -1 1696.16 38.4958 11
 -2 0 -1 1703.27 38.4599 7
 -2 0 -1 1750.19 36.898 9
 -2 0 -1 1762.11 36.8628 24
 -2 0 -1 1721.4 38.6071 7
 2 0 1 1721.97 35.0583 21
 2 0 1 1932.57 36.3162 32
 2 0 1 1725.18 35.9706 13
 2 0 1 1747.18 38.4929 11
 2 0 1 1722.57 39.0242 5
 2 0 1 1722.5 37.0768 9
 2 0 1 1696.75 38.6934 7
 2 0 1 1732.11 38.7591 3
 -3 0 -1 412.73 9.27282 3
 -3 0 -1 428.044 9.19134 31
 -3 0 -1 406.017 9.23201 11
 -3 0 -1 417.111 9.26485 7
 -3 0 -1 413.208 9.28451 7
 -3 0 -1 422.971 8.87136 9
 -3 0 -1 412.855 8.63896 13
 -3 0 -1 446.567 8.21988 27
 -3 0 -1 417.16 8.85864 24
 3 0 1 412.441 8.36277 21
 3 0 1 413.355 9.28212 7
 3 0 1 410.456 8.64505 13
 3 0 1 414.909 9.23047 11
 3 0 1 405.939 9.25846 7
 3 0 1 419.199 8.96627 32
 3 0 1 414.575 8.86592 9
 3 0 1 415.705 9.35006 5
 -4 0 -1 2.85682 0.34809 3
 -4 0 -1 1.89503 0.46387 31
 -4 0 -1 2.44166 0.38551 11
 -4 0 -1 2.87973 0.43606 7
 -4 0 -1 2.22572 0.39278 24
 -4 0 -1 2.32277 0.35582 13
 -4 0 -1 2.425 0.39184 7
 -4 0 -1 2.50384 0.33277 9
 4 0 1 2.4936 0.29449 21
 4 0 1 2.10035 0.3713 7
 4 0 1 1.39259 0.5332 32
 4 0 1 2.56615 0.27482 18
 4 0 1 2.11123 0.3555 9
 4 0 1 2.23481 0.32324 5
 4 0 1 2.45154 0.36779 11
 4 0 1 2.20774 0.43273 13
 4 0 1 2.88022 0.43662 7
 -5 0 -1 3.44235 0.48304 13
 -5 0 -1 2.78674 0.40794 9
 -5 0 -1 2.60502 0.46646 24
 -5 0 -1 3.43858 0.5215 7
 -5 0 -1 2.49064 0.60002 31
 -5 0 -1 3.22016 0.40669 3
 -5 0 -1 2.40655 0.4498 11
 -5 0 -1 2.55618 0.45278 7
 5 0 1 1.81372 0.44571 7
 5 0 1 3.35109 0.4891 7
 5 0 1 2.6903 0.44951 9
 5 0 1 3.13328 0.66606 32
 5 0 1 2.44279 0.39182 5
 5 0 1 3.24086 0.52079 13
 5 0 1 2.55339 0.42139 11
 5 0 1 3.03322 0.33023 18
 -6 0 -1 1.06168 0.51984 15
 -6 0 -1 1.13841 0.7082 31
 -6 0 -1 1.42991 0.56141 24
 -6 0 -1 1.91388 0.55754 7
 -6 0 -1 1.40422 0.49199 7
 -6 0 -1 0.74418 0.37225 3
 -6 0 -1 1.13085 0.52632 11
 -6 0 -1 0.92505 0.44358 13
 6 0 1 1.49299 0.35496 18
 6 0 1 1.59716 0.38044 5
 6 0 1 1.38519 0.54488 13
 6 0 1 2.12864 0.51902 7
 6 0 1 1.398 0.77369 32
 6 0 1 1.47066 0.49224 9
 6 0 1 1.59697 0.52108 7
 6 0 1 0.89022 0.47673 11
 -7 0 -1 10.925 1.11861 7
 -7 0 -1 11.5918 0.92588 3
 -7 0 -1 10.535 0.84747 19
 -7 0 -1 12.6406 1.18594 15
 -7 0 -1 11.1218 1.19171 11
 -7 0 -1 9.84255 1.09812 13
 -7 0 -1 9.50295 1.15453 7
 -7 0 -1 12.1945 1.3177 24
 -7 0 -1 11.9661 1.32283 31
 7 0 1 12.3358 1.23828 7
 7 0 1 13.5389 1.17178 7
 7 0 1 9.11169 0.84255 5
 7 0 1 11.1601 0.96456 8
 7 0 1 11.0794 1.1035 11
 7 0 1 10.2819 1.13319 9
 7 0 1 11.3439 1.28227 32
 7 0 1 10.8343 0.96257 13
 -8 0 -1 0.99142 0.96779 31
 -8 0 -1 2.18432 0.83724 13
 -8 0 -1 1.88392 0.6643 7
 -8 0 -1 1.34047 0.77681 7
 -8 0 -1 1.96722 0.8634 11
 -8 0 -1 1.74984 0.88141 24
 -8 0 -1 1.98777 0.54243 19
 -8 0 -1 2.52183 0.82005 15
 -8 0 -1 1.92649 1.00756 29
 8 0 1 1.03567 0.80803 13
 8 0 1 1.87245 0.5315 5
 8 0 1 2.25446 0.8121 11
 8 0 1 1.3891 1.12535 32
 8 0 1 1.27544 0.73161 9
 8 0 1 1.78468 0.52427 8
 8 0 1 2.88386 0.75369 7
 8 0 1 2.6482 0.84845 7
 -9 0 -1 8.1687 1.49262 31
 -9 0 -1 11.76 1.40295 29
 -9 0 -1 11.5882 1.24854 7
 -9 0 -1 9.45567 1.08989 3
 -9 0 -1 9.63129 1.16742 13
 -9 0 -1 11.234 1.3667 24
 -9 0 -1 12.096 1.20626 15
 -9 0 -1 10.7055 1.30624 7
 -9 0 -1 10.4409 1.26466 11
 -9 0 -1 9.6857 1.17316 10
 9 0 1 13.0233 1.37363 7
 9 0 1 12.2456 1.21411 8
 9 0 1 11.0694 1.15637 9
 9 0 1 12.3578 1.35601 5
 9 0 1 9.8516 1.22914 11
 9 0 1 10.7829 1.02494 2
 9 0 1 11.7577 1.2619 7
 9 0 1 10.4523 1.59818 32
 10 -1 -1 -0.1348 1.02736 9
 10 -1 -1 0.6312 0.87877 2
 10 -1 -1 -1.1044 1.31519 32
 10 -1 -1 0.00726 1.22875 12
 10 -1 -1 -0.9067 0.87995 5
 10 -1 -1 0.79027 0.99267 7
 10 -1 -1 -0.2281 1.47018 7
 -10 1 1 -2.1263 1.22965 11
 -10 1 1 -1.5092 1.14541 15
 -10 1 1 -3.0606 1.05648 7
 -10 1 1 0.7536 1.21279 7
 -10 1 1 -0.4004 1.59387 24
 -10 1 1 -2.0285 1.37685 29
 -10 1 1 1.69975 1.29633 31
 -10 1 1 0.84653 1.21071 13
 9 -1 -1 2.55569 1.3193 32
 9 -1 -1 1.80463 1.09735 7
 9 -1 -1 1.55833 0.72221 7
 9 -1 -1 1.44646 0.8291 9
 9 -1 -1 2.18196 1.01136 11
 9 -1 -1 2.99903 0.67764 8
 9 -1 -1 2.11211 0.6633 5
 -9 1 1 1.68134 0.93792 13
 -9 1 1 1.5966 1.00911 11
 -9 1 1 2.93559 0.78156 19
 -9 1 1 2.06726 1.09932 29
 -9 1 1 1.9033 0.63574 3
 -9 1 1 2.71682 0.84489 7
 -9 1 1 -0.1435 1.18196 24
 -9 1 1 2.73363 1.21418 31
 -9 1 1 2.3735 0.94426 7
 8 -1 -1 22.0057 1.23139 8
 8 -1 -1 25.9318 1.56742 11
 8 -1 -1 24.4142 1.44141 18
 8 -1 -1 26.3952 1.48394 7
 8 -1 -1 24.7998 1.76365 7
 8 -1 -1 21.167 1.95184 32
 8 -1 -1 22.639 1.26351 5
 8 -1 -1 22.7564 1.34823 9
 -8 1 1 26.1619 1.55665 13
 -8 1 1 20.7896 1.56058 7
 -8 1 1 21.1263 1.96786 31
 -8 1 1 23.9872 1.24419 3
 -8 1 1 24.2081 1.72595 11
 -8 1 1 21.8698 1.84988 24
 -8 1 1 22.9099 1.46776 7
 -8 1 1 21.2013 1.30156 19
 7 -1 -1 6.88612 0.89435 7
 7 -1 -1 7.23365 0.68276 5
 7 -1 -1 6.56712 0.64596 9
 7 -1 -1 6.25613 0.72781 7
 7 -1 -1 7.69723 0.82994 11
 7 -1 -1 6.80931 0.67524 8
 7 -1 -1 5.5943 1.04417 32
 7 -1 -1 6.68583 0.70929 18
 7 -1 -1 6.35926 0.77556 13
 -7 1 1 4.28718 0.66086 7
 -7 1 1 6.90178 0.75497 13
 -7 1 1 6.93138 0.81289 11
 -7 1 1 5.76749 0.59942 3
 -7 1 1 5.9156 0.72086 5
 -7 1 1 6.87903 0.75505 7
 -7 1 1 6.01096 0.88486 24
 -7 1 1 6.71536 0.68645 19
 -7 1 1 6.82178 1.10349 31
 6 -1 -1 21.4702 1.12537 7
 6 -1 -1 21.947 1.07482 18
 6 -1 -1 22.678 0.65379 1
 6 -1 -1 21.6974 0.97344 9
 6 -1 -1 20.6548 1.43553 32
 6 -1 -1 20.9631 1.1993 7
 6 -1 -1 21.3185 1.14093 13
 6 -1 -1 21.1647 1.00086 5
 6 -1 -1 23.3503 1.14996 11
 6 -1 -1 24.1868 1.03026 8
 -6 1 1 22.3689 1.31153 24
 -6 1 1 21.7775 1.18386 11
 -6 1 1 22.8354 1.43553 31
 -6 1 1 22.5293 1.00864 3
 -6 1 1 23.0958 1.09357 5
 -6 1 1 21.3126 1.01733 19
 -6 1 1 22.26 1.07594 13
 -6 1 1 22.4965 1.19185 7
 -6 1 1 23.1367 1.14844 7
 5 -1 -1 35.252 1.15086 8
 5 -1 -1 34.5435 1.19087 13
 5 -1 -1 35.5618 1.17954 18
 5 -1 -1 35.4773 1.5089 32
 5 -1 -1 34.3369 1.30007 7
 5 -1 -1 36.7422 1.27264 7
 5 -1 -1 32.4139 1.22184 11
 5 -1 -1 33.2241 1.06103 9
 5 -1 -1 32.1878 1.16072 5
 5 -1 -1 33.7721 0.86437 1
 -5 1 1 31.9866 1.21677 7
 -5 1 1 34.3198 1.28003 11
 -5 1 1 32.9547 1.12176 19
 -5 1 1 34.1042 1.15622 3
 -5 1 1 31.8228 1.12608 13
 -5 1 1 32.5656 1.28271 7
 -5 1 1 34.6526 1.21352 5
 -5 1 1 33.3741 1.45511 31
 4 -1 -1 123.249 2.92201 18
 4 -1 -1 125.948 2.83062 13
 4 -1 -1 124.916 3.05032 5
 4 -1 -1 125.365 3.08071 7
 4 -1 -1 124.683 3.06297 11
 4 -1 -1 124.567 2.80332 9
 4 -1 -1 122.909 3.05135 7
 4 -1 -1 126.536 3.16122 32
 4 -1 -1 127.842 2.77668 1
 4 -1 -1 121.804 2.76558 8
 -4 1 1 125.722 3.05635 7
 -4 1 1 124.698 2.80513 13
 -4 1 1 122.372 2.9401 19
 -4 1 1 120.676 2.99236 3
 -4 1 1 126.028 3.08555 7
 -4 1 1 125.457 3.06117 5
 -4 1 1 126.323 3.08032 11
 3 -1 -1 0.42975 0.22977 8
 3 -1 -1 0.48502 0.11436 1
 3 -1 -1 0.74907 0.22842 5
 3 -1 -1 0.05231 0.31471 32
 3 -1 -1 0.17825 0.24252 13
 3 -1 -1 0.25513 0.199 9
 3 -1 -1 0.51034 0.26622 7
 3 -1 -1 0.68233 0.25691 7
 3 -1 -1 0.56712 0.27499 18
 3 -1 -1 0.45115 0.26466 11
 -3 1 1 0.30094 0.23673 7
 -3 1 1 0.35888 0.26746 7
 -3 1 1 0.72054 0.29591 11
 -3 1 1 0.32675 0.2315 5
 -3 1 1 0.38748 0.22577 13
 -3 1 1 0.68232 0.20859 3
 -3 1 1 0.31265 0.2455 19
 -3 1 1 0.72842 0.14515 1
 2 -1 -1 5.49685 0.36345 13
 2 -1 -1 5.23263 0.53813 32
 2 -1 -1 4.03865 0.43959 11
 2 -1 -1 5.13912 0.42443 7
 2 -1 -1 5.30573 0.4401 7
 2 -1 -1 5.21371 0.21796 1
 2 -1 -1 5.01627 0.27626 9
 2 -1 -1 5.09917 0.40728 12
 2 -1 -1 4.70879 0.38077 5
 -2 1 1 4.38359 0.41726 19
 -2 1 1 5.24871 0.34293 13
 -2 1 1 4.90526 0.22099 1
 -2 1 1 5.30422 0.4391 7
 -2 1 1 4.87391 0.35325 3
 -2 1 1 4.86296 0.47299 11
 -2 1 1 5.37971 0.38509 5
 -2 1 1 5.49613 0.39531 8
 -2 1 1 5.04932 0.43855 7
 1 -1 -1 80.4673 1.75424 32
 1 -1 -1 76.2491 1.79991 5
 1 -1 -1 80.5387 1.72305 1
 1 -1 -1 78.3373 1.77544 7
 1 -1 -1 76.5843 1.79269 19
 1 -1 -1 77.6431 1.91487 2
 1 -1 -1 77.497 1.77947 7
 1 -1 -1 79.5258 1.61856 33
 1 -1 -1 75.6726 1.60706 12
 -1 1 1 73.2603 1.60999 8
 -1 1 1 77.7884 1.58202 29
 -1 1 1 76.4604 1.60634 12
 -1 1 1 80.1438 1.7756 7
 -1 1 1 77.0644 1.73786 3
 -1 1 1 77.0814 1.71859 1
 -1 1 1 75.8443 1.77656 7
 -1 1 1 73.3872 1.78626 19
 -1 1 1 77.1042 1.58189 13
 0 -1 -1 118.629 2.35929 14
 0 1 1 104.617 2.6804 2
 0 1 1 100.41 2.44369 7
 0 1 1 125.309 2.41788 30
 0 1 1 112.772 2.16471 25
 0 1 1 110.979 2.20924 12
 0 1 1 103.867 2.35046 9
 0 1 1 104.352 2.41981 1
 -1 -1 -1 6.8945 0.35919 7
 -1 -1 -1 6.71709 0.23151 26
 -1 -1 -1 7.55818 0.28568 6
 -1 -1 -1 6.2267 0.36981 7
 -1 -1 -1 6.94216 0.34407 2
 -1 -1 -1 6.81451 0.32222 3
 -1 -1 -1 7.52839 0.3436 27
 -1 -1 -1 7.85203 0.44259 31
 -1 -1 -1 7.22696 0.38165 15
 -1 -1 -1 7.77583 0.36825 24
 1 1 1 7.31222 0.42639 13
 1 1 1 7.05434 0.34142 2
 1 1 1 7.20876 0.34747 24
 1 1 1 7.3938 0.45654 32
 1 1 1 6.64838 0.38337 15
 1 1 1 6.18892 0.26337 6
 1 1 1 7.21946 0.36807 7
 1 1 1 7.25269 0.37469 7
 1 1 1 6.99099 0.40716 30
 1 1 1 6.96843 0.39126 9
 -2 -1 -1 74.451 1.81349 7
 -2 -1 -1 76.0368 1.8954 31
 -2 -1 -1 72.3656 1.80594 11
 -2 -1 -1 70.3876 1.76747 3
 -2 -1 -1 76.5056 1.54767 27
 -2 -1 -1 73.5947 1.79188 7
 -2 -1 -1 68.8449 1.734 9
 -2 -1 -1 72.2679 1.69849 24
 -2 -1 -1 72.5626 1.74176 15
 2 1 1 72.696 1.79595 11
 2 1 1 70.5113 1.75434 13
 2 1 1 72.7389 1.79644 7
 2 1 1 72.6706 1.89716 2
 2 1 1 74.7877 1.81458 7
 2 1 1 72.2947 1.69014 24
 2 1 1 69.4991 1.73801 9
 2 1 1 73.8693 1.87529 32
 -3 -1 -1 362.432 6.77508 27
 -3 -1 -1 344.096 7.65915 31
 -3 -1 -1 342.34 7.37198 9
 -3 -1 -1 337.845 7.19897 13
 -3 -1 -1 337.208 7.69168 3
 -3 -1 -1 347.959 7.70211 11
 -3 -1 -1 347.377 7.55524 15
 -3 -1 -1 341.067 7.35673 24
 -3 -1 -1 341.66 7.69144 7
 3 1 1 333.353 7.68594 7
 3 1 1 344.367 7.71387 7
 3 1 1 339.746 7.37306 9
 3 1 1 337.228 7.20516 13
 3 1 1 345.19 7.69198 11
 3 1 1 344.176 7.77526 5
 3 1 1 346.198 7.50175 32
 -4 -1 -1 1.205 0.36584 7
 -4 -1 -1 0.66391 0.32391 15
 -4 -1 -1 1.10455 0.37584 7
 -4 -1 -1 0.46151 0.3641 13
 -4 -1 -1 0.58669 0.29228 9
 -4 -1 -1 0.71586 0.50775 31
 -4 -1 -1 1.48535 0.37608 24
 -4 -1 -1 0.53048 0.27395 27
 -4 -1 -1 0.70515 0.35923 11
 -4 -1 -1 0.79351 0.29025 3
 4 1 1 0.82875 0.27811 5
 4 1 1 1.08991 0.36856 7
 4 1 1 0.8301 0.27169 21
 4 1 1 0.63229 0.4939 32
 4 1 1 0.56088 0.33687 9
 4 1 1 0.60851 0.32036 11
 4 1 1 1.2042 0.38306 7
 4 1 1 0.29396 0.38038 13
 -5 -1 -1 4.75333 0.47738 9
 -5 -1 -1 4.74284 0.51837 7
 -5 -1 -1 5.69315 0.56714 24
 -5 -1 -1 5.20432 0.7201 31
 -5 -1 -1 4.3984 0.5122 7
 -5 -1 -1 5.29746 0.57921 13
 -5 -1 -1 5.21306 0.50514 15
 -5 -1 -1 5.70424 0.59774 11
 -5 -1 -1 5.07345 0.48802 3
 5 1 1 5.43064 0.58878 5
 5 1 1 5.15634 0.56148 7
 5 1 1 4.72235 0.50248 9
 5 1 1 4.05362 0.5038 7
 5 1 1 6.48545 0.83843 32
 5 1 1 5.83787 0.56453 11
 5 1 1 4.50479 0.58575 13
 5 1 1 5.09884 0.55099 21
 -6 -1 -1 4.09563 0.64891 11
 -6 -1 -1 4.11983 0.50447 3
 -6 -1 -1 4.94399 0.67865 24
 -6 -1 -1 5.98636 0.71172 7
 -6 -1 -1 4.02001 0.82899 31
 -6 -1 -1 4.59094 0.60205 13
 -6 -1 -1 4.6972 0.64073 7
 -6 -1 -1 4.68928 0.57481 15
 -6 -1 -1 4.47792 0.56084 9
 6 1 1 3.86153 0.51055 5
 6 1 1 5.66668 0.74164 2
 6 1 1 4.48146 0.62016 11
 6 1 1 5.77811 0.68587 7
 6 1 1 4.29725 0.42865 21
 6 1 1 4.08353 0.65012 13
 6 1 1 3.84469 0.85813 32
 6 1 1 5.33662 0.65882 7
 6 1 1 4.53355 0.60023 9
 -7 -1 -1 0.49394 0.57306 13
 -7 -1 -1 1.1673 0.94238 31
 -7 -1 -1 0.60856 0.72647 24
 -7 -1 -1 -0.2284 0.36461 3
 -7 -1 -1 0.2648 0.58907 7
 -7 -1 -1 -0.4844 0.61245 7
 -7 -1 -1 0.68957 0.55242 9
 -7 -1 -1 -0.1602 0.64323 11
 -7 -1 -1 1.39391 0.59503 15
 7 1 1 -0.1565 0.2875 1
 7 1 1 -0.1146 0.6732 13
 7 1 1 0.36174 0.58056 9
 7 1 1 0.31695 0.59663 11
 7 1 1 -0.3701 0.45613 2
 7 1 1 0.49808 0.62404 7
 7 1 1 0.38779 0.39531 5
 7 1 1 0.03707 0.87015 32
 7 1 1 -0.0715 0.58554 7
 -8 -1 -1 6.17882 1.2978 31
 -8 -1 -1 5.1115 0.86575 7
 -8 -1 -1 6.63041 0.87246 15
 -8 -1 -1 8.27818 0.97062 3
 -8 -1 -1 7.70383 1.0099 11
 -8 -1 -1 7.32951 0.93198 13
 -8 -1 -1 7.1035 1.01976 7
 -8 -1 -1 7.11008 1.02703 24
 8 1 1 6.50728 0.9671 7
 8 1 1 7.61687 0.95323 11
 8 1 1 5.77255 0.75088 5
 8 1 1 7.62218 0.94725 9
 8 1 1 5.29814 0.65794 8
 8 1 1 5.82944 1.37576 32
 8 1 1 6.79985 0.78857 2
 8 1 1 6.62134 1.05523 7
 -9 -1 -1 13.4234 1.60492 15
 -9 -1 -1 13.8286 1.3624 13
 -9 -1 -1 11.577 1.21373 3
 -9 -1 -1 12.008 1.4551 24
 -9 -1 -1 12.7573 1.40201 11
 -9 -1 -1 13.4498 1.31924 7
 -9 -1 -1 12.9422 1.39787 7
 -9 -1 -1 12.0002 1.35111 19
 -9 -1 -1 10.2813 1.51861 31
 9 1 1 14.3608 1.3501 5
 9 1 1 11.8517 1.23002 7
 9 1 1 10.6655 1.18647 9
 9 1 1 14.5497 1.32453 8
 9 1 1 10.61 1.71346 32
 9 1 1 15.9671 1.89032 11
 9 1 1 14.3854 1.48631 2
 9 1 1 18.7799 2.18753 7
 10 -2 -1 -1.7653 0.94832 9
 10 -2 -1 3.02818 0.98922 7
 10 -2 -1 1.66513 1.43789 7
 10 -2 -1 0.67516 0.9317 5
 10 -2 -1 1.47383 1.37335 32
 10 -2 -1 -0.7129 1.11997 12
 -10 2 1 -0.7058 1.22275 31
 -10 2 1 -0.6422 0.77983 3
 -10 2 1 0.29958 1.56422 24
 -10 2 1 0.98649 1.16907 7
 -10 2 1 -1.8296 1.23264 11
 -10 2 1 0.64619 1.18802 13
 -10 2 1 1.65138 1.1552 7
 9 -2 -1 3.49901 0.82957 9
 9 -2 -1 3.05562 0.78865 5
 9 -2 -1 2.93094 0.82785 7
 9 -2 -1 2.98837 0.91057 18
 9 -2 -1 3.31901 1.10942 7
 9 -2 -1 1.94886 1.23416 32
 9 -2 -1 3.24528 0.6063 8
 9 -2 -1 1.65574 0.88165 12
 -9 2 1 3.66117 1.07592 11
 -9 2 1 1.83586 0.93604 7
 -9 2 1 2.48256 1.17283 24
 -9 2 1 3.13546 0.70103 3
 -9 2 1 4.2232 1.08625 29
 -9 2 1 3.86156 1.26886 31
 -9 2 1 2.39162 0.90244 7
 -9 2 1 3.58241 0.95224 13
 -9 2 1 1.98576 0.70453 10
 8 -2 -1 51.4094 2.551 32
 8 -2 -1 55.9559 1.86528 8
 8 -2 -1 57.702 2.0148 18
 8 -2 -1 57.823 2.30409 7
 8 -2 -1 55.2709 1.95509 5
 8 -2 -1 56.4614 2.12554 13
 8 -2 -1 54.5218 1.85312 9
 8 -2 -1 58.6766 2.09942 7
 -8 2 1 55.7556 1.88388 3
 -8 2 1 53.6384 1.77858 19
 -8 2 1 49.2698 1.94205 13
 -8 2 1 55.2032 2.03938 5
 -8 2 1 58.7924 2.13394 7
 -8 2 1 57.4465 2.35871 24
 -8 2 1 55.1077 1.89711 29
 -8 2 1 50.7065 2.17138 11
 -8 2 1 56.7319 2.2714 7
 -8 2 1 52.5601 2.55591 31
 7 -2 -1 50.4931 1.72658 5
 7 -2 -1 50.0872 1.80553 13
 7 -2 -1 50.1638 1.7581 18
 7 -2 -1 50.9391 1.82628 7
 7 -2 -1 47.4963 2.24106 32
 7 -2 -1 47.6047 1.58768 9
 7 -2 -1 52.9103 1.68019 8
 -7 2 1 47.6496 1.57809 19
 -7 2 1 51.5802 1.91791 11
 -7 2 1 50.4619 1.91283 7
 -7 2 1 51.3602 1.68294 3
 -7 2 1 51.0445 1.78294 5
 -7 2 1 49.2495 1.71308 13
 -7 2 1 50.4797 1.60046 29
 -7 2 1 51.6964 1.84624 7
 -7 2 1 48.5957 2.21475 31
 -7 2 1 48.6183 1.97498 24
 6 -2 -1 8.24224 0.90611 7
 6 -2 -1 7.55224 0.67395 13
 6 -2 -1 8.35563 0.73385 9
 6 -2 -1 7.2433 0.67616 18
 6 -2 -1 7.54079 0.9472 32
 6 -2 -1 7.9903 0.74952 8
 6 -2 -1 6.26686 0.64885 7
 6 -2 -1 8.13355 0.71959 5
 -6 2 1 7.05479 0.62038 13
 -6 2 1 7.99043 0.9174 7
 -6 2 1 6.849 0.69126 11
 -6 2 1 7.9775 0.88024 7
 -6 2 1 7.09813 0.70035 3
 -6 2 1 7.00202 0.73447 19
 -6 2 1 8.67662 0.6207 29
 -6 2 1 8.20075 0.83922 5
 5 -2 -1 -0.3563 0.3924 18
 5 -2 -1 0.20425 0.43491 7
 5 -2 -1 -0.0082 0.15433 1
 5 -2 -1 0.37438 0.29311 5
 5 -2 -1 0.42498 0.38695 13
 5 -2 -1 0.15841 0.58279 32
 5 -2 -1 0.39938 0.31933 8
 5 -2 -1 0.0665 0.38585 7
 5 -2 -1 0.23346 0.31132 9
 -5 2 1 0.29255 0.32791 13
 -5 2 1 0.20948 0.3268 5
 -5 2 1 0.03443 0.24507 21
 -5 2 1 -0.2647 0.27766 3
 -5 2 1 -0.2321 0.40404 7
 -5 2 1 0.03758 0.36691 11
 -5 2 1 -0.0979 0.36567 7
 -5 2 1 0.38761 0.33812 19
 4 -2 -1 196.86 4.63124 32
 4 -2 -1 208.427 4.32447 1
 4 -2 -1 194.701 4.28987 9
 4 -2 -1 197.26 4.2319 13
 4 -2 -1 198.299 4.62082 7
 4 -2 -1 194.002 4.62316 5
 -4 2 1 199.549 4.61929 7
 -4 2 1 199.264 4.56264 3
 -4 2 1 197.006 4.64729 7
 -4 2 1 195.717 4.62819 11
 -4 2 1 194.034 4.21806 13
 -4 2 1 196.251 4.63571 5
 -4 2 1 198.183 4.32586 1
 -4 2 1 188.598 4.46893 19
 3 -2 -1 523.935 10.7928 32
 3 -2 -1 534.999 10.9109 1
 3 -2 -1 497.788 11.1787 7
 3 -2 -1 497.945 10.2925 13
 3 -2 -1 489.809 11.2773 5
 3 -2 -1 508.539 9.95949 12
 3 -2 -1 507.277 11.0283 19
 3 -2 -1 501.422 10.0441 8
 3 -2 -1 518.262 11.1789 7
 -3 2 1 494.418 11.1605 7
 -3 2 1 506.616 10.2912 13
 -3 2 1 492.797 11.2808 5
 -3 2 1 492.062 11.1371 3
 -3 2 1 505.112 10.0474 8
 -3 2 1 500.497 11.1842 7
 -3 2 1 501.798 11.0228 19
 -3 2 1 515.138 10.9076 1
 -3 2 1 489.849 11.1777 11
 2 -2 -1 969.035 18.756 32
 2 -2 -1 872.882 17.447 12
 2 -2 -1 881.295 19.6809 7
 2 -2 -1 899.846 19.5591 19
 2 -2 -1 924.12 19.4419 1
 2 -2 -1 850.278 19.8466 3
 2 -2 -1 894.807 19.6161 7
 2 -2 -1 873.795 20.0001 5
 2 -2 -1 863.616 17.6006 8
 2 -2 -1 882.894 18.1892 13
 -2 2 1 907.035 19.6272 7
 -2 2 1 890.302 19.8992 5
 -2 2 1 892.562 18.1901 13
 -2 2 1 915.313 19.6162 7
 -2 2 1 902.257 19.8056 3
 -2 2 1 926.8 17.4576 12
 -2 2 1 941.612 19.3873 1
 -2 2 1 876.836 17.6051 8
 1 -2 -1 10.7101 0.48288 33
 1 -2 -1 9.81565 0.47643 7
 1 -2 -1 9.58822 0.45658 7
 1 -2 -1 10.0041 0.32954 3
 1 -2 -1 10.8221 0.55094 31
 1 -2 -1 9.35879 0.46333 2
 1 -2 -1 10.1465 0.55569 32
 1 -2 -1 9.75272 0.4774 12
 1 -2 -1 9.65585 0.56221 28
 1 -2 -1 9.56666 0.44051 8
 -1 2 1 9.78804 0.46932 7
 -1 2 1 9.85915 0.48543 12
 -1 2 1 10.2795 0.44007 8
 -1 2 1 9.49187 0.31372 3
 -1 2 1 10.4023 0.55515 30
 -1 2 1 9.23338 0.56382 28
 -1 2 1 10.0307 0.42423 10
 -1 2 1 9.9487 0.33787 1
 -1 2 1 9.64147 0.43297 5
 0 -2 -1 141.303 2.95692 12
 0 -2 -1 148.031 3.17723 9
 0 -2 -1 154.459 2.9472 6
 0 -2 -1 151.148 3.30252 31
 0 -2 -1 150.951 2.95247 33
 0 -2 -1 143.164 3.30808 7
 0 -2 -1 145.543 3.59793 2
 0 -2 -1 146.453 3.3038 7
 0 -2 -1 143.47 3.12767 14
 0 2 1 147.443 3.11893 10
 0 2 1 144.739 3.5963 2
 0 2 1 137.58 2.93701 6
 0 2 1 145.703 3.30066 7
 0 2 1 140.245 3.16711 9
 0 2 1 153.439 3.25626 30
 0 2 1 143.521 3.23841 4
 0 2 1 141.705 3.12669 14
 0 2 1 147.717 2.96617 12
 -1 -2 -1 63.1752 1.53339 9
 -1 -2 -1 61.9531 1.56655 7
 -1 -2 -1 64.1217 1.62878 31
 -1 -2 -1 63.1054 1.66726 2
 -1 -2 -1 63.6742 1.4592 4
 -1 -2 -1 63.731 1.56973 24
 -1 -2 -1 63.8338 1.55712 7
 -1 -2 -1 67.4527 1.3485 6
 -1 -2 -1 64.2265 1.43997 20
 1 2 1 60.918 1.33864 6
 1 2 1 61.1353 1.66625 2
 1 2 1 64.9139 1.57559 7
 1 2 1 63.4922 1.54847 24
 1 2 1 61.6779 1.53427 9
 1 2 1 62.2483 1.55701 7
 1 2 1 66.2809 1.62552 32
 1 2 1 64.876 1.60349 30
 1 2 1 63.1815 1.45252 4
 -2 -2 -1 1024.61 24.6912 2
 -2 -2 -1 985.511 22.489 4
 -2 -2 -1 1060.77 22.0339 31
 -2 -2 -1 1031.29 21.6049 24
 -2 -2 -1 1008.98 22.4863 7
 -2 -2 -1 1105.31 20.1188 27
 -2 -2 -1 1022.11 21.568 9
 -2 -2 -1 997.761 22.4995 7
 -2 -2 -1 1012.12 20.9157 13
 2 2 1 999.34 22.2133 15
 2 2 1 983.314 22.4813 7
 2 2 1 1020.78 20.9246 13
 2 2 1 1048.11 22.541 11
 2 2 1 1042.76 22.5094 7
 2 2 1 1096.64 21.5309 32
 2 2 1 1022.47 21.5963 24
 2 2 1 1039.06 21.5759 9
 2 2 1 1078.77 21.7554 30
 2 2 1 997.452 24.6074 2
 -3 -2 -1 214.811 4.82247 24
 -3 -2 -1 227.971 4.39229 27
 -3 -2 -1 208.906 5.08668 31
 -3 -2 -1 217.033 4.74864 13
 -3 -2 -1 220.144 4.83613 9
 -3 -2 -1 218.782 5.06521 11
 -3 -2 -1 224.507 4.8869 15
 -3 -2 -1 223.847 5.03786 7
 -3 -2 -1 216.226 5.0531 7
 3 2 1 221.428 4.84933 9
 3 2 1 217.351 5.04857 11
 3 2 1 214.816 5.41542 2
 3 2 1 218.563 5.03336 7
 3 2 1 210.674 4.7515 13
 3 2 1 219.662 4.99676 32
 3 2 1 218.84 4.81724 24
 3 2 1 220.868 5.05632 7
 -4 -2 -1 5.7995 0.69115 7
 -4 -2 -1 5.15398 0.64654 31
 -4 -2 -1 5.44596 0.54944 3
 -4 -2 -1 6.48742 0.73279 11
 -4 -2 -1 4.11889 0.46749 7
 -4 -2 -1 5.35002 0.48597 9
 -4 -2 -1 6.46508 0.56425 15
 -4 -2 -1 5.75747 0.52953 24
 -4 -2 -1 6.71049 0.47748 27
 -4 -2 -1 5.59959 0.53779 13
 4 2 1 6.40273 0.65735 7
 4 2 1 6.21864 0.53759 2
 4 2 1 5.34648 0.50864 9
 4 2 1 5.52658 0.70234 32
 4 2 1 6.03532 0.56395 5
 4 2 1 6.53301 0.69833 7
 4 2 1 6.01836 0.59117 13
 4 2 1 5.50748 0.51831 11
 4 2 1 5.67287 0.64056 24
 -5 -2 -1 5.02346 0.55073 13
 -5 -2 -1 7.24894 0.82536 7
 -5 -2 -1 6.94879 0.58981 9
 -5 -2 -1 7.26795 0.66892 24
 -5 -2 -1 7.88236 0.84437 7
 -5 -2 -1 7.94516 0.94462 31
 -5 -2 -1 6.50006 0.66983 3
 -5 -2 -1 7.07009 0.69117 15
 -5 -2 -1 7.48883 0.88107 11
 5 2 1 7.58002 0.6533 5
 5 2 1 5.98059 0.63924 13
 5 2 1 7.32279 0.86721 7
 5 2 1 6.59029 0.64109 7
 5 2 1 7.00104 0.63068 9
 5 2 1 7.21353 0.64332 21
 5 2 1 8.58555 0.99962 32
 5 2 1 6.90935 0.78139 11
 5 2 1 7.02203 0.66053 2
 -6 -2 -1 1.30198 0.52427 13
 -6 -2 -1 1.56867 0.62929 24
 -6 -2 -1 1.70706 0.42166 3
 -6 -2 -1 1.47903 0.50327 9
 -6 -2 -1 1.74207 0.63591 11
 -6 -2 -1 1.50328 0.49729 15
 -6 -2 -1 1.28414 0.56014 7
 -6 -2 -1 1.75999 0.55017 7
 -6 -2 -1 2.41269 0.79724 31
 6 2 1 1.70304 0.42749 5
 6 2 1 1.37533 0.53013 11
 6 2 1 1.79683 0.56628 9
 6 2 1 0.59876 0.78803 32
 6 2 1 1.52533 0.41012 21
 6 2 1 1.82403 0.43591 2
 6 2 1 1.69372 0.59226 7
 6 2 1 2.3692 0.57902 7
 -7 -2 -1 15.6425 1.26871 13
 -7 -2 -1 13.9617 1.33819 7
 -7 -2 -1 14.6688 1.24801 7
 -7 -2 -1 10.7937 1.24371 31
 -7 -2 -1 15.3936 1.20261 9
 -7 -2 -1 14.8774 1.00599 3
 -7 -2 -1 14.55 1.08107 15
 -7 -2 -1 13.1889 1.06097 24
 -7 -2 -1 13.0563 1.40244 11
 7 2 1 11.0315 1.28392 11
 7 2 1 13.0694 1.30073 9
 7 2 1 13.5893 0.96459 5
 7 2 1 11.9267 0.8364 21
 7 2 1 12.2468 1.06558 2
 7 2 1 11.1305 1.41689 32
 7 2 1 12.4265 1.25669 7
 7 2 1 15.7773 1.35986 7
 -8 -2 -1 36.1145 2.30979 31
 -8 -2 -1 41.6361 1.86247 9
 -8 -2 -1 40.0259 2.12591 24
 -8 -2 -1 36.8972 1.96402 7
 -8 -2 -1 37.8484 1.57981 3
 -8 -2 -1 39.1168 2.0905 11
 -8 -2 -1 39.8598 1.88359 13
 -8 -2 -1 41.159 1.93428 7
 -8 -2 -1 38.5853 1.65026 15
 8 2 1 39.2033 2.03041 7
 8 2 1 38.589 1.63947 8
 8 2 1 39.4717 1.92606 7
 8 2 1 39.4937 1.75388 2
 8 2 1 37.5069 1.94968 11
 8 2 1 39.7521 1.6242 5
 8 2 1 37.3734 2.41681 32
 8 2 1 36.8978 1.89916 9
 8 2 1 36.4658 1.19125 1
 -9 -2 -1 19.8242 1.30398 3
 -9 -2 -1 12.1087 1.36607 7
 -9 -2 -1 13.1802 1.73278 31
 -9 -2 -1 17.9081 1.97174 13
 -9 -2 -1 15.2029 1.56237 24
 -9 -2 -1 16.3663 1.88875 7
 9 2 1 13.9935 1.79539 30
 9 2 1 16.0002 1.58133 2
 9 2 1 14.0819 1.38009 9
 9 2 1 17.6962 1.53327 8
 9 2 1 14.5456 1.39333 7
 9 2 1 15.1281 1.4638 11
 9 2 1 13.713 1.47172 7
 9 2 1 11.0889 1.08733 5
 9 2 1 13.3906 1.85247 32
 10 -3 -1 1.02422 1.27486 32
 10 -3 -1 0.44621 1.13567 12
 10 -3 -1 2.02555 1.19327 18
 10 -3 -1 0.96313 0.99491 5
 10 -3 -1 1.54284 0.97895 9
 10 -3 -1 0.96605 0.88527 7
 -10 3 1 -1.6688 1.11478 7
 -10 3 1 0.32995 1.17962 7
 -10 3 1 1.52679 1.34106 11
 -10 3 1 1.48398 0.84385 3
 -10 3 1 4.01155 1.47789 31
 -10 3 1 1.59773 1.57984 24
 -10 3 1 -0.0352 1.24539 13
 9 -3 -1 2.06358 0.63279 8
 9 -3 -1 1.61731 1.22924 32
 9 -3 -1 1.50339 0.78861 9
 9 -3 -1 1.56868 1.00552 13
 9 -3 -1 0.11424 0.8246 12
 9 -3 -1 2.09689 0.9613 18
 9 -3 -1 0.91542 0.98815 7
 9 -3 -1 1.18436 0.75106 5
 9 -3 -1 0.82547 0.71327 7
 -9 3 1 0.84988 0.74928 10
 -9 3 1 0.89558 0.8659 7
 -9 3 1 0.63291 1.08893 31
 -9 3 1 -0.9472 0.92556 11
 -9 3 1 0.87927 0.76285 5
 -9 3 1 1.12805 0.94241 7
 -9 3 1 -0.4609 0.86361 13
 -9 3 1 -0.3856 1.15511 24
 -9 3 1 0.4745 0.59657 3
 8 -3 -1 35.0223 1.50572 9
 8 -3 -1 36.5454 1.6935 12
 8 -3 -1 38.099 1.62603 5
 8 -3 -1 33.9619 2.17737 32
 8 -3 -1 37.7788 1.50447 8
 8 -3 -1 36.5526 1.75459 18
 8 -3 -1 37.8394 1.72479 7
 8 -3 -1 33.8867 1.74268 13
 8 -3 -1 37.6902 1.95391 7
 -8 3 1 33.0829 2.14028 31
 -8 3 1 35.898 1.86648 7
 -8 3 1 35.0258 1.68416 5
 -8 3 1 31.604 1.67584 7
 -8 3 1 38.8993 1.54255 3
 -8 3 1 37.49 1.73911 10
 -8 3 1 38.3064 1.6573 13
 -8 3 1 38.5088 1.89254 11
 7 -3 -1 37.5555 1.37833 9
 7 -3 -1 39.3585 1.45739 8
 7 -3 -1 36.2612 1.61465 18
 7 -3 -1 39.5442 1.62053 7
 7 -3 -1 40.1438 1.77586 7
 7 -3 -1 38.546 1.54461 12
 7 -3 -1 39.0189 1.49049 5
 7 -3 -1 38.6368 1.57233 13
 7 -3 -1 35.971 2.02697 32
 -7 3 1 36.7744 1.68544 7
 -7 3 1 36.7356 1.4181 3
 -7 3 1 37.394 1.471 13
 -7 3 1 37.8513 1.66153 11
 -7 3 1 38.1318 1.65454 10
 -7 3 1 39.2468 1.63421 7
 -7 3 1 40.0687 1.5779 5
 6 -3 -1 0.13072 0.51421 18
 6 -3 -1 0.69659 0.44152 7
 6 -3 -1 0.56644 0.47467 13
 6 -3 -1 0.26346 0.3666 5
 6 -3 -1 0.0105 0.68179 32
 6 -3 -1 0.28125 0.44033 12
 6 -3 -1 0.29179 0.40253 9
 6 -3 -1 1.01241 0.55558 7
 6 -3 -1 0.28159 0.40892 8
 -6 3 1 0.30601 0.3497 3
 -6 3 1 0.67905 0.43016 5
 -6 3 1 0.3006 0.48377 7
 -6 3 1 0.40804 0.41497 13
 -6 3 1 -0.3314 0.45899 7
 -6 3 1 0.92097 0.48569 11
 -6 3 1 0.70985 0.34514 21
 5 -3 -1 22.8883 1.1169 7
 5 -3 -1 23.275 1.04705 7
 5 -3 -1 23.4854 1.31466 32
 5 -3 -1 22.8355 0.94959 13
 5 -3 -1 22.931 0.93729 5
 5 -3 -1 22.5473 0.98758 12
 5 -3 -1 23.6799 0.8744 9
 5 -3 -1 24.0994 0.96459 8
 -5 3 1 23.2141 0.90971 13
 -5 3 1 23.107 0.99004 5
 -5 3 1 21.7079 0.68669 1
 -5 3 1 24.6584 1.08776 11
 -5 3 1 23.0085 0.9117 3
 -5 3 1 23.948 1.12286 7
 -5 3 1 22.2172 1.06297 7
 4 -3 -1 263.616 5.88754 19
 4 -3 -1 258.244 6.03422 5
 4 -3 -1 263.456 5.41981 12
 4 -3 -1 263.329 5.97977 32
 4 -3 -1 264.499 5.51027 13
 4 -3 -1 259.196 6.04545 7
 4 -3 -1 259.401 5.43547 8
 4 -3 -1 262.233 6.03355 7
 -4 3 1 264.464 6.02865 7
 -4 3 1 258.864 5.71962 1
 -4 3 1 261.688 6.05348 7
 -4 3 1 263.58 5.49892 13
 -4 3 1 253.02 6.03382 5
 -4 3 1 259.533 6.02795 11
 -4 3 1 266.556 5.95264 3
 -4 3 1 262.007 5.44517 8
 3 -3 -1 206.859 4.27892 12
 3 -3 -1 207.358 4.75234 7
 3 -3 -1 209.425 4.70283 32
 3 -3 -1 207.496 4.76785 7
 3 -3 -1 204.591 4.28098 8
 3 -3 -1 206.411 4.30938 13
 3 -3 -1 205.115 4.66886 19
 3 -3 -1 203.963 4.66834 3
 3 -3 -1 205.581 4.75568 5
 -3 3 1 204.082 4.7553 5
 -3 3 1 206.842 4.52767 1
 -3 3 1 208.487 4.74874 7
 -3 3 1 201.794 4.28404 8
 -3 3 1 208.247 4.66587 3
 -3 3 1 203.069 4.62847 10
 -3 3 1 203.445 4.83451 28
 -3 3 1 203.666 4.76256 7
 2 -3 -1 647.67 13.2252 13
 2 -3 -1 652.77 14.3568 7
 2 -3 -1 681.618 13.7892 32
 2 -3 -1 649.391 12.7964 12
 2 -3 -1 697.468 12.5491 33
 2 -3 -1 658.029 14.3711 7
 2 -3 -1 668.374 14.1278 31
 2 -3 -1 645.65 12.8889 8
 2 -3 -1 634.466 14.3406 3
 -2 3 1 661.099 14.3599 7
 -2 3 1 666.143 14.1429 1
 -2 3 1 644.348 14.3682 7
 -2 3 1 644.156 14.5086 5
 -2 3 1 647.583 14.6741 28
 -2 3 1 649.078 14.3036 3
 -2 3 1 643.029 12.7963 12
 -2 3 1 634.057 12.8852 8
 -2 3 1 641.632 13.9035 10
 1 -3 -1 1.20962 0.24587 2
 1 -3 -1 1.44477 0.26892 12
 1 -3 -1 1.3249 0.35572 28
 1 -3 -1 1.22591 0.22102 10
 1 -3 -1 1.33504 0.27831 7
 1 -3 -1 1.93058 0.4082 31
 1 -3 -1 1.58622 0.24072 8
 1 -3 -1 1.27913 0.25873 7
 1 -3 -1 1.61786 0.39862 32
 1 -3 -1 1.83952 0.21634 3
 1 -3 -1 1.68187 0.28897 33
 -1 3 1 1.27839 0.13778 3
 -1 3 1 1.39893 0.22711 10
 -1 3 1 1.04194 0.24054 2
 -1 3 1 2.06825 0.17561 25
 -1 3 1 1.05267 0.24221 7
 -1 3 1 1.51 0.24 8
 -1 3 1 1.07207 0.23739 7
 -1 3 1 1.39401 0.29102 12
 -1 3 1 1.82973 0.40005 30
 0 -3 -1 379.103 8.20611 9
 0 -3 -1 375.284 8.54997 7
 0 -3 -1 383.071 8.56365 7
 0 -3 -1 403.997 7.6656 6
 0 -3 -1 406.902 7.53684 33
 0 -3 -1 393.528 8.44716 31
 0 -3 -1 385.62 8.0674 14
 0 -3 -1 385.671 8.19361 10
 0 -3 -1 382.07 8.47215 4
 0 -3 -1 378.465 7.61395 12
 0 -3 -1 382.362 9.34288 2
 0 3 1 411.595 8.35096 30
 0 3 1 386.133 8.55532 7
 0 3 1 388.923 8.06981 14
 0 3 1 390.664 8.19448 10
 0 3 1 369.909 9.33798 2
 0 3 1 380.476 8.46805 4
 0 3 1 374.494 7.61236 12
 0 3 1 377.865 8.53741 7
 -1 -3 -1 10.9471 0.43805 4
 -1 -3 -1 11.5725 0.51355 20
 -1 -3 -1 11.5776 0.56207 7
 -1 -3 -1 11.0333 0.52201 2
 -1 -3 -1 11.1601 0.58579 7
 -1 -3 -1 10.7243 0.61681 13
 -1 -3 -1 12.1764 0.36339 6
 -1 -3 -1 9.82486 0.59738 9
 -1 -3 -1 11.6014 0.75465 31
 1 3 1 11.2622 0.53813 2
 1 3 1 11.5012 0.53218 12
 1 3 1 11.3881 0.67832 24
 1 3 1 11.7954 0.38691 6
 1 3 1 10.8351 0.70461 30
 1 3 1 11.1111 0.586 7
 1 3 1 11.7288 0.51384 20
 1 3 1 11.0842 0.41981 4
 1 3 1 10.781 0.55672 7
 -2 -3 -1 27.5715 0.84915 20
 -2 -3 -1 28.1219 0.93255 7
 -2 -3 -1 27.3233 0.77774 4
 -2 -3 -1 27.793 0.92883 9
 -2 -3 -1 27.8066 1.08644 31
 -2 -3 -1 28.0563 0.97898 24
 -2 -3 -1 28.8654 0.91625 2
 2 3 1 29.664 1.10644 32
 2 3 1 27.2243 0.99735 11
 2 3 1 28.6946 0.96704 7
 2 3 1 28.2205 0.95595 24
 2 3 1 26.3031 0.92123 2
 2 3 1 27.355 0.93008 7
 2 3 1 29.0621 1.06543 30
 2 3 1 28.4516 0.96455 9
 2 3 1 26.8889 0.85037 15
 -3 -3 -1 239.964 4.74897 27
 -3 -3 -1 232.096 5.10448 13
 -3 -3 -1 237.689 5.43767 7
 -3 -3 -1 235.783 5.40973 7
 -3 -3 -1 236.23 5.22566 24
 -3 -3 -1 232.953 5.48376 31
 -3 -3 -1 232.858 5.23109 4
 -3 -3 -1 231.446 5.20048 9
 3 3 1 235.013 5.39222 32
 3 3 1 224.312 5.39582 30
 3 3 1 236.647 5.43378 7
 3 3 1 232.089 5.19658 24
 3 3 1 230.024 5.21883 15
 3 3 1 235.177 5.81959 2
 3 3 1 236.547 5.45902 11
 3 3 1 235.322 5.21996 9
 3 3 1 235.147 5.40984 7
 -4 -3 -1 67.6326 2.15617 31
 -4 -3 -1 66.9363 1.86196 9
 -4 -3 -1 67.2355 1.93437 7
 -4 -3 -1 70.2383 1.57523 27
 -4 -3 -1 68.2338 1.91689 24
 -4 -3 -1 70.5236 1.9859 7
 -4 -3 -1 69.7314 1.74228 4
 -4 -3 -1 67.8826 1.91106 13
 4 3 1 66.142 2.14962 32
 4 3 1 66.0944 1.86796 24
 4 3 1 68.9674 1.97475 7
 4 3 1 68.7804 1.94971 7
 4 3 1 69.5257 1.97093 11
 4 3 1 67.7217 2.12534 30
 4 3 1 66.7469 1.89151 9
 4 3 1 69.0582 1.96263 2
 4 3 1 68.8725 1.93139 5
 -5 -3 -1 3.86626 0.703 31
 -5 -3 -1 4.89629 0.56494 7
 -5 -3 -1 4.5105 0.56365 7
 -5 -3 -1 5.81976 0.68251 24
 -5 -3 -1 6.43638 0.65943 13
 -5 -3 -1 5.25517 0.46254 4
 -5 -3 -1 5.41557 0.58676 9
 -5 -3 -1 5.99473 0.66736 3
 5 3 1 6.14699 0.64807 7
 5 3 1 5.62577 0.6563 5
 5 3 1 7.7612 1.00097 32
 5 3 1 5.56211 0.61461 9
 5 3 1 5.16783 0.58203 11
 5 3 1 4.41062 0.5895 24
 5 3 1 7.00371 0.84047 7
 5 3 1 5.96531 0.68383 2
 5 3 1 5.06232 0.86704 30
 -6 -3 -1 6.98603 0.69265 13
 -6 -3 -1 6.95892 0.94279 31
 -6 -3 -1 10.6867 1.02948 9
 -6 -3 -1 9.31372 1.06148 7
 -6 -3 -1 10.1727 0.90371 24
 -6 -3 -1 9.95838 1.07384 7
 -6 -3 -1 10.3753 0.8802 3
 6 3 1 9.0692 0.81664 5
 6 3 1 10.1739 1.04515 11
 6 3 1 7.9712 0.78695 7
 6 3 1 9.95629 0.84006 21
 6 3 1 11.638 1.27839 32
 6 3 1 10.5242 0.88695 2
 6 3 1 9.56161 1.084 9
 6 3 1 9.53273 1.19685 30
 6 3 1 9.50008 1.06961 7
 -7 -3 -1 23.7573 1.88568 31
 -7 -3 -1 25.9551 1.46413 13
 -7 -3 -1 26.062 1.59839 7
 -7 -3 -1 26.0272 1.55048 7
 -7 -3 -1 26.3749 1.7238 24
 -7 -3 -1 25.5586 1.42342 9
 -7 -3 -1 26.7307 1.30023 3
 7 3 1 23.6028 1.61413 7
 7 3 1 25.4801 2.0054 32
 7 3 1 23.7637 1.95781 30
 7 3 1 27.6589 1.55965 7
 7 3 1 25.3622 1.56686 9
 7 3 1 24.3761 1.1281 21
 7 3 1 26.4849 1.34238 2
 7 3 1 24.7207 1.2178 5
 7 3 1 27.8972 1.56232 11
 -8 -3 -1 13.299 1.11052 3
 -8 -3 -1 17.0402 1.56525 9
 -8 -3 -1 10.8817 1.19301 7
 -8 -3 -1 8.81624 1.3474 31
 -8 -3 -1 11.7197 1.23025 4
 -8 -3 -1 11.7462 1.1647 7
 -8 -3 -1 9.7139 1.22695 24
 -8 -3 -1 9.68496 1.03643 13
 8 3 1 11.2193 1.05871 5
 8 3 1 9.74778 1.47622 30
 8 3 1 8.29877 1.45869 32
 8 3 1 11.8617 1.199 11
 8 3 1 11.8783 1.29303 2
 8 3 1 12.9425 1.2257 7
 8 3 1 9.52838 1.09882 9
 8 3 1 10.59 1.16808 7
 -9 -3 -1 0.90092 1.03572 9
 -9 -3 -1 -0.4017 1.2713 31
 -9 -3 -1 1.41593 0.9566 7
 -9 -3 -1 0.22995 1.01485 13
 -9 -3 -1 -0.4025 1.33862 24
 -9 -3 -1 -0.8823 1.2155 7
 -9 -3 -1 -0.737 0.63246 3
 -9 -3 -1 0.01087 0.82929 4
 9 3 1 0.10197 1.25848 23
 9 3 1 -0.5808 1.18172 7
 9 3 1 -0.905 0.93552 7
 9 3 1 -1.4683 0.66018 5
 9 3 1 0.44963 0.79228 8
 9 3 1 0.60643 1.13561 9
 9 3 1 -1.4263 1.36642 32
 9 3 1 -0.6309 0.85801 2
 9 3 1 -1.1425 1.13969 11
 9 3 1 -0.2585 0.55821 1
 9 3 1 1.48624 1.50367 30
 10 -4 -1 3.51534 1.05268 7
 10 -4 -1 1.30411 1.05198 5
 10 -4 -1 -0.2113 1.25415 18
 10 -4 -1 -0.6758 1.47707 7
 10 -4 -1 -0.325 1.13278 12
 -10 4 1 -0.9772 1.15043 7
 -10 4 1 -2.4148 0.88843 3
 -10 4 1 -0.3178 1.30639 11
 -10 4 1 -1.0061 1.229 31
 -10 4 1 0.40469 1.20927 7
 -10 4 1 1.20559 1.04526 5
 -10 4 1 2.84867 1.20097 13
 9 -4 -1 1.45779 1.33283 32
 9 -4 -1 1.83314 1.16279 7
 9 -4 -1 2.22166 0.79008 5
 9 -4 -1 1.00995 0.95753 18
 9 -4 -1 2.68424 0.81221 7
 9 -4 -1 2.0748 0.86132 12
 9 -4 -1 3.49051 0.73082 8
 9 -4 -1 1.50002 0.97655 13
 9 -4 -1 1.19571 0.79434 9
 -9 4 1 2.55463 0.87436 13
 -9 4 1 1.34725 0.83961 5
 -9 4 1 0.50045 0.87278 7
 -9 4 1 1.6835 1.1746 31
 -9 4 1 1.73793 0.75442 10
 -9 4 1 2.20803 0.73838 3
 -9 4 1 2.1939 0.99242 11
 -9 4 1 2.02205 0.95299 7
 8 -4 -1 19.2638 1.26211 9
 8 -4 -1 16.838 1.86443 32
 8 -4 -1 16.5234 1.27828 5
 8 -4 -1 21.4927 1.40161 7
 8 -4 -1 19.887 1.42163 12
 8 -4 -1 18.0929 1.19442 8
 8 -4 -1 20.9613 1.5173 13
 8 -4 -1 19.1957 1.60595 18
 8 -4 -1 19.5272 1.74212 7
 -8 4 1 20.8161 1.40065 13
 -8 4 1 18.472 1.61514 7
 -8 4 1 16.3148 1.42692 7
 -8 4 1 19.0651 1.42753 5
 -8 4 1 22.9895 1.42042 10
 -8 4 1 20.2079 1.23752 3
 -8 4 1 19.0678 1.5688 11
 7 -4 -1 70.7217 2.03267 9
 7 -4 -1 71.9392 2.3532 18
 7 -4 -1 74.3943 2.46432 7
 7 -4 -1 70.7022 2.13535 13
 7 -4 -1 73.5994 2.10393 8
 7 -4 -1 74.1267 2.35557 7
 7 -4 -1 72.7112 2.7286 32
 7 -4 -1 73.011 2.21367 5
 7 -4 -1 71.9028 2.174 12
 -7 4 1 71.8033 1.84124 21
 -7 4 1 74.5042 2.42937 7
 -7 4 1 71.4497 2.25704 5
 -7 4 1 69.6585 2.30411 7
 -7 4 1 71.729 2.35831 11
 -7 4 1 74.3852 2.1719 3
 -7 4 1 75.5073 2.10499 13
 -7 4 1 75.0351 2.36883 10
 6 -4 -1 30.486 1.28848 12
 6 -4 -1 31.3078 1.24172 5
 6 -4 -1 30.9197 1.70103 32
 6 -4 -1 30.0872 1.22751 13
 6 -4 -1 31.5219 1.14921 9
 6 -4 -1 31.2273 1.1946 8
 6 -4 -1 33.0707 1.37346 7
 6 -4 -1 31.251 1.43635 7
 -6 4 1 32.7336 1.20297 3
 -6 4 1 32.1371 1.42206 7
 -6 4 1 31.7274 1.184 13
 -6 4 1 30.1987 1.39781 11
 -6 4 1 31.5948 1.35616 7
 -6 4 1 30.996 1.42728 10
 -6 4 1 29.9611 1.27117 5
 5 -4 -1 58.1625 1.66533 19
 5 -4 -1 60.5855 1.67675 12
 5 -4 -1 58.5861 1.58941 13
 5 -4 -1 59.7337 1.62356 8
 5 -4 -1 60.1909 1.81966 7
 5 -4 -1 58.5013 1.6996 5
 5 -4 -1 54.8799 2.01082 32
 5 -4 -1 59.3992 1.85454 7
 -5 4 1 58.7711 1.80092 7
 -5 4 1 61.8603 1.83398 10
 -5 4 1 57.2541 1.82469 7
 -5 4 1 58.0471 1.71593 5
 -5 4 1 55.022 1.62353 8
 -5 4 1 54.9528 1.4274 1
 -5 4 1 56.6438 1.79997 11
 -5 4 1 59.1085 1.65003 3
 4 -4 -1 234.25 4.98576 13
 4 -4 -1 234.27 5.37062 19
 4 -4 -1 235.072 5.39853 3
 4 -4 -1 243.067 4.98501 12
 4 -4 -1 235.15 4.95568 8
 4 -4 -1 239.443 5.49195 5
 4 -4 -1 240.319 4.87193 33
 4 -4 -1 234.142 5.4987 7
 4 -4 -1 238.814 5.50841 32
 4 -4 -1 235.228 5.52226 7
 -4 4 1 239.049 5.38771 3
 -4 4 1 232.52 5.36384 10
 -4 4 1 233.303 5.52184 7
 -4 4 1 234.119 5.49246 11
 -4 4 1 234.052 4.9633 8
 -4 4 1 231.103 5.48802 7
 -4 4 1 230.914 5.48612 5
 -4 4 1 233.182 5.56669 28
 3 -4 -1 266.558 6.01387 5
 3 -4 -1 261.107 6.02055 7
 3 -4 -1 262.293 6.00218 7
 3 -4 -1 256.872 5.39329 12
 3 -4 -1 268.662 5.25252 33
 3 -4 -1 267.216 5.9005 3
 3 -4 -1 261.128 5.93204 19
 3 -4 -1 264.825 5.40736 8
 3 -4 -1 257.42 5.44994 13
 3 -4 -1 254.57 5.91222 32
 -3 4 1 259 5.88213 3
 -3 4 1 263.05 6.02254 7
 -3 4 1 267.069 5.07934 16
 -3 4 1 257.694 6.0854 28
 -3 4 1 261.015 5.99207 7
 -3 4 1 267.472 5.84421 10
 -3 4 1 259.937 5.40623 8
 -3 4 1 259.764 6.01092 5
 2 -4 -1 470.179 10.1674 31
 2 -4 -1 459.46 11.2048 2
 2 -4 -1 478.347 9.9347 32
 2 -4 -1 485.161 8.93922 33
 2 -4 -1 457.465 10.2703 7
 2 -4 -1 458.332 9.16943 12
 2 -4 -1 458.642 10.2584 7
 2 -4 -1 462.299 10.4789 28
 2 -4 -1 463.785 9.21041 8
 2 -4 -1 459.534 10.1584 3
 -2 4 1 447.075 9.16807 12
 -2 4 1 450.52 10.1483 3
 -2 4 1 449.579 9.20447 8
 -2 4 1 453.862 10.2509 7
 -2 4 1 456.077 10.3395 5
 -2 4 1 475.212 10.0243 30
 -2 4 1 457.644 9.91638 10
 -2 4 1 467.861 10.2821 7
 1 -4 -1 79.7466 1.8654 3
 1 -4 -1 84.047 2.12085 32
 1 -4 -1 80.6821 1.85189 12
 1 -4 -1 79.1394 2.17511 2
 1 -4 -1 83.5391 1.78131 33
 1 -4 -1 81.2943 1.90529 10
 1 -4 -1 80.1109 2.1327 28
 1 -4 -1 82.126 2.05459 7
 1 -4 -1 81.0036 1.80928 8
 1 -4 -1 83.6626 2.15432 31
 -1 4 1 77.9494 1.84703 14
 -1 4 1 77.7445 2.03365 7
 -1 4 1 80.3521 1.89432 10
 -1 4 1 78.8478 1.85126 12
 -1 4 1 79.2802 2.02614 7
 -1 4 1 79.3381 1.81593 8
 -1 4 1 82.1272 2.09642 30
 -1 4 1 79.4399 2.18114 2
 -1 4 1 82.0419 1.97078 4
 0 -4 -1 19.6165 0.68425 4
 0 -4 -1 20.5306 0.81945 7
 0 -4 -1 20.159 0.71853 12
 0 -4 -1 19.2022 0.70168 14
 0 -4 -1 19.7448 0.78472 9
 0 -4 -1 19.2762 0.77525 2
 0 -4 -1 18.7429 0.78497 7
 0 -4 -1 20.7629 0.55177 6
 0 -4 -1 20.6962 0.92787 31
 0 -4 -1 20.2329 0.65886 10
 0 4 1 20.583 0.67829 4
 0 4 1 21.1116 0.70447 8
 0 4 1 20.4479 0.73969 12
 0 4 1 19.656 0.64043 10
 0 4 1 19.7228 0.79415 7
 0 4 1 20.2289 0.90094 30
 0 4 1 19.3482 0.77479 2
 0 4 1 19.4234 0.76282 7
 -1 -4 -1 16.037 0.59801 10
 -1 -4 -1 16.0448 0.59736 4
 -1 -4 -1 17.1385 0.4658 6
 -1 -4 -1 16.0676 0.737 7
 -1 -4 -1 16.6168 0.71965 7
 -1 -4 -1 16.6443 0.74953 9
 -1 -4 -1 15.3729 0.86918 31
 -1 -4 -1 16.3285 0.68019 2
 1 4 1 15.4144 0.68604 2
 1 4 1 16.4297 0.76012 9
 1 4 1 15.9572 0.87148 30
 1 4 1 15.1525 0.82068 24
 1 4 1 17.0644 0.74393 7
 1 4 1 16.112 0.57078 4
 1 4 1 15.5604 0.60573 20
 1 4 1 16.3574 0.65976 12
 -2 -4 -1 84.8763 2.01435 4
 -2 -4 -1 83.309 2.11136 13
 -2 -4 -1 85.0116 2.27302 2
 -2 -4 -1 84.0726 2.13136 9
 -2 -4 -1 81.678 2.1544 7
 -2 -4 -1 82.3403 2.32091 31
 -2 -4 -1 82.935 1.93045 20
 -2 -4 -1 83.598 2.19053 7
 -2 -4 -1 85.3252 2.20981 24
 2 4 1 82.5272 2.2762 2
 2 4 1 83.0456 2.16256 7
 2 4 1 85.039 2.25792 11
 2 4 1 84.6869 2.14636 9
 2 4 1 82.4035 1.93741 12
 2 4 1 83.7948 2.28412 30
 2 4 1 84.152 2.19834 7
 2 4 1 88.615 2.34444 32
 2 4 1 83.5732 2.16982 24
 2 4 1 85.6685 2.00879 4
 -3 -4 -1 7.49355 0.78084 13
 -3 -4 -1 9.52841 0.66529 20
 -3 -4 -1 9.39981 0.69756 9
 -3 -4 -1 7.76423 0.54889 2
 -3 -4 -1 8.67956 0.84094 24
 -3 -4 -1 9.41204 0.95163 31
 -3 -4 -1 8.05201 0.49907 4
 -3 -4 -1 9.45675 0.74176 7
 -3 -4 -1 8.09255 0.71061 7
 3 4 1 9.18195 0.78488 9
 3 4 1 9.067 0.43753 23
 3 4 1 8.11422 0.78101 24
 3 4 1 8.00179 0.57845 15
 3 4 1 7.70442 0.60611 2
 3 4 1 9.30364 0.73541 7
 3 4 1 7.80964 0.68842 7
 3 4 1 5.87686 0.68786 32
 3 4 1 6.61559 0.67571 30
 3 4 1 7.20732 0.75506 11
 -4 -4 -1 144.822 3.45794 9
 -4 -4 -1 140.799 3.5745 7
 -4 -4 -1 146.988 3.51848 24
 -4 -4 -1 139.843 3.43617 13
 -4 -4 -1 141.812 3.04873 27
 -4 -4 -1 141.828 3.35144 4
 -4 -4 -1 143.019 3.60492 7
 -4 -4 -1 140.978 3.79855 31
 4 4 1 140.771 3.4763 9
 4 4 1 142.21 3.46463 24
 4 4 1 144.262 3.62251 7
 4 4 1 145.986 3.78215 32
 4 4 1 143.43 3.08754 23
 4 4 1 146.588 3.59156 7
 4 4 1 140.999 3.62172 11
 4 4 1 147.048 3.77262 30
 4 4 1 139.276 3.31922 15
 4 4 1 141.377 3.74657 2
 -5 -4 -1 6.02327 0.74733 24
 -5 -4 -1 5.58457 0.66537 4
 -5 -4 -1 4.8349 0.60703 9
 -5 -4 -1 4.37545 0.58367 7
 -5 -4 -1 5.49173 0.98454 31
 -5 -4 -1 5.7688 0.66388 7
 -5 -4 -1 4.80566 0.64255 13
 -5 -4 -1 5.7794 0.52366 27
 5 4 1 5.03613 0.53634 2
 5 4 1 5.42998 0.92305 32
 5 4 1 4.70609 0.60749 11
 5 4 1 6.1409 0.87514 30
 5 4 1 4.28704 0.55611 7
 5 4 1 5.01815 0.66251 9
 5 4 1 6.01287 0.71511 24
 5 4 1 5.99585 0.67237 7
 5 4 1 5.36544 0.53489 23
 5 4 1 6.54328 0.75565 5
 -6 -4 -1 75.2576 2.37846 7
 -6 -4 -1 71.7667 2.23773 9
 -6 -4 -1 69.1161 2.18111 3
 -6 -4 -1 68.0571 2.70458 31
 -6 -4 -1 67.5044 2.32856 7
 -6 -4 -1 71.4318 2.02099 4
 -6 -4 -1 71.7893 2.37468 24
 -6 -4 -1 75.8368 2.29245 13
 6 4 1 73.7243 2.25758 2
 6 4 1 73.0984 2.22396 5
 6 4 1 71.1431 2.32987 11
 6 4 1 74.9398 2.36757 7
 6 4 1 70.1503 2.69506 30
 6 4 1 70.7115 2.75413 32
 6 4 1 78.1893 2.36352 7
 6 4 1 70.269 2.01819 23
 6 4 1 74.6796 2.30708 9
 -7 -4 -1 12.8733 1.30458 9
 -7 -4 -1 13.0473 1.2907 13
 -7 -4 -1 15.0897 1.52285 7
 -7 -4 -1 10.9513 1.40719 31
 -7 -4 -1 16.6341 1.35688 7
 -7 -4 -1 13.0649 1.09091 4
 -7 -4 -1 13.4228 1.08612 3
 -7 -4 -1 12.505 1.17956 24
 7 4 1 12.8802 1.14858 2
 7 4 1 11.2078 1.08801 21
 7 4 1 15.3191 1.00607 5
 7 4 1 12.8307 1.46515 7
 7 4 1 13.6389 1.31808 23
 7 4 1 16.537 1.47262 11
 7 4 1 13.9081 1.39926 7
 7 4 1 14.6524 1.5381 9
 7 4 1 10.4855 1.39205 30
 7 4 1 13.4561 1.58125 32
 -8 -4 -1 5.35163 0.96444 13
 -8 -4 -1 4.75038 0.74468 3
 -8 -4 -1 4.26465 1.31497 31
 -8 -4 -1 5.7741 0.97667 9
 -8 -4 -1 7.21975 1.27631 24
 -8 -4 -1 6.38739 0.79358 4
 -8 -4 -1 5.62631 0.97494 7
 -8 -4 -1 6.7879 1.18269 7
 8 4 1 5.47023 1.13798 7
 8 4 1 6.92557 0.79608 5
 8 4 1 5.70843 1.09624 9
 8 4 1 7.32983 1.07212 23
 8 4 1 5.88462 0.86066 2
 8 4 1 7.27215 1.06031 7
 8 4 1 6.39992 0.70166 21
 8 4 1 6.75315 1.07997 11
 8 4 1 5.60971 1.47691 32
 8 4 1 6.2023 1.43396 30
 -9 -4 -1 -0.8711 1.54634 24
 -9 -4 -1 0.47615 0.91102 4
 -9 -4 -1 0.9492 1.33529 7
 -9 -4 -1 1.4011 1.09632 13
 -9 -4 -1 1.01829 1.36617 31
 -9 -4 -1 1.08174 1.03905 7
 -9 -4 -1 1.66473 1.19862 9
 9 4 1 1.39102 1.07976 8
 9 4 1 1.01086 0.93535 2
 9 4 1 1.97063 1.34127 11
 9 4 1 0.67128 1.27431 23
 9 4 1 -0.2821 1.25646 9
 9 4 1 -1.1028 1.45844 30
 9 4 1 1.05239 0.6605 1
 9 4 1 0.83484 1.39117 32
 9 4 1 2.49391 1.35986 7
 9 4 1 2.20477 1.08743 7
 9 -5 -1 10.6531 1.48092 7
 9 -5 -1 10.2494 0.97492 9
 9 -5 -1 7.53495 0.99122 5
 9 -5 -1 13.6429 1.57384 7
 9 -5 -1 8.35326 1.13134 13
 9 -5 -1 9.35997 1.28261 18
 9 -5 -1 6.13796 1.41681 32
 9 -5 -1 7.64559 1.10363 12
 9 -5 -1 9.37877 0.90431 8
 -9 5 1 10.2025 0.99127 10
 -9 5 1 7.41181 1.04304 7
 -9 5 1 9.76231 1.10315 5
 -9 5 1 9.44177 1.00425 3
 -9 5 1 9.05819 1.18527 7
 -9 5 1 9.47659 1.26028 11
 8 -5 -1 7.14081 0.75038 8
 8 -5 -1 10.6245 1.12067 18
 8 -5 -1 9.71408 1.19936 7
 8 -5 -1 8.25525 0.82209 5
 8 -5 -1 8.36658 0.79858 9
 8 -5 -1 7.93961 1.3317 32
 8 -5 -1 12.6471 1.31154 7
 8 -5 -1 8.56931 0.89711 12
 8 -5 -1 10.0192 0.95299 13
 -8 5 1 8.54543 0.97998 7
 -8 5 1 11.1971 1.17797 3
 -8 5 1 9.14006 0.92867 10
 -8 5 1 8.76111 1.03811 11
 -8 5 1 8.03258 0.72296 21
 -8 5 1 9.9414 0.95595 5
 -8 5 1 10.1627 1.09681 7
 7 -5 -1 17.6834 1.10203 5
 7 -5 -1 17.5986 1.20838 12
 7 -5 -1 18.2262 1.10916 9
 7 -5 -1 17.5136 1.68998 32
 7 -5 -1 17.8569 1.07193 8
 7 -5 -1 19.883 1.35154 7
 7 -5 -1 17.392 1.23891 13
 7 -5 -1 18.0955 1.51431 7
 -7 5 1 19.242 1.1165 3
 -7 5 1 18.1641 1.4055 7
 -7 5 1 17.5793 1.07704 21
 -7 5 1 17.0227 1.27217 10
 -7 5 1 16.4958 1.39681 28
 -7 5 1 18.5484 1.2235 5
 -7 5 1 18.0417 1.37877 11
 -7 5 1 17.0031 1.28383 7
 6 -5 -1 26.6761 1.43577 7
 6 -5 -1 24.8476 1.28143 7
 6 -5 -1 22.1062 1.07105 8
 6 -5 -1 22.9549 1.65127 32
 6 -5 -1 24.5704 1.12793 5
 6 -5 -1 24.5673 1.13676 13
 6 -5 -1 22.233 1.17251 12
 -6 5 1 23.7065 1.24792 10
 -6 5 1 25.5407 1.31372 7
 -6 5 1 24.3823 1.33091 7
 -6 5 1 26.3354 1.18545 5
 -6 5 1 23.2551 1.33525 28
 -6 5 1 26.7794 1.08807 3
 -6 5 1 25.997 1.29843 11
 5 -5 -1 29.9893 1.5613 32
 5 -5 -1 31.1905 1.10735 3
 5 -5 -1 30.8076 1.32058 33
 5 -5 -1 30.9139 1.32311 7
 5 -5 -1 29.6333 1.1059 8
 5 -5 -1 29.8782 1.2353 7
 5 -5 -1 30.8905 1.12911 5
 5 -5 -1 30.1616 1.07779 13
 5 -5 -1 28.7094 1.17787 19
 5 -5 -1 29.8652 1.19692 12
 -5 5 1 29.2513 1.26583 28
 -5 5 1 28.9486 1.27933 7
 -5 5 1 30.533 1.27 10
 -5 5 1 29.5897 1.25682 7
 -5 5 1 28.8168 1.15935 8
 -5 5 1 30.663 1.06463 3
 -5 5 1 30.0463 1.15409 5
 -5 5 1 29.0135 1.27503 11
 4 -5 -1 783.66 17.3006 5
 4 -5 -1 790.701 14.9739 33
 4 -5 -1 779.302 17.1685 7
 4 -5 -1 768.952 17.0744 3
 4 -5 -1 759.083 15.7818 13
 4 -5 -1 764.7 16.5858 32
 4 -5 -1 779.335 15.3305 12
 4 -5 -1 770.167 17.1879 7
 4 -5 -1 757.805 16.9546 19
 4 -5 -1 777.299 15.418 8
 -4 5 1 778.431 15.4246 8
 -4 5 1 765.944 17.2955 5
 -4 5 1 775.908 17.0634 3
 -4 5 1 762.024 17.4492 28
 -4 5 1 794.912 16.6705 10
 -4 5 1 781.037 17.1957 7
 -4 5 1 768.28 17.1588 7
 3 -5 -1 827.284 17.183 13
 3 -5 -1 854.195 18.4211 31
 3 -5 -1 848.845 18.5689 3
 3 -5 -1 847.096 16.7415 8
 3 -5 -1 847.191 18.6695 7
 3 -5 -1 889.38 16.249 33
 3 -5 -1 851.557 18.6865 7
 3 -5 -1 828.877 16.6322 12
 3 -5 -1 850.872 17.9675 32
 -3 5 1 845.174 18.5596 3
 -3 5 1 839.312 18.8247 5
 -3 5 1 831.055 16.7454 8
 -3 5 1 845.634 18.6885 7
 -3 5 1 850.061 18.0741 10
 -3 5 1 844.195 18.6589 7
 -3 5 1 845.218 16.6486 12
 -3 5 1 836.239 19.0131 28
 2 -5 -1 -0.0769 0.34068 33
 2 -5 -1 0.10418 0.48418 32
 2 -5 -1 0.73402 0.32782 12
 2 -5 -1 0.47748 0.36464 7
 2 -5 -1 0.52469 0.32518 7
 2 -5 -1 0.28719 0.29224 2
 2 -5 -1 0.23538 0.39585 28
 2 -5 -1 0.65098 0.30676 10
 2 -5 -1 0.25781 0.26093 8
 2 -5 -1 1.11519 0.4987 31
 2 -5 -1 0.46776 0.19799 3
 -2 5 1 0.59388 0.2632 4
 -2 5 1 0.18182 0.30727 12
 -2 5 1 0.23854 0.26578 10
 -2 5 1 0.34575 0.46216 30
 -2 5 1 0.24805 0.3227 7
 -2 5 1 0.42969 0.29034 8
 -2 5 1 0.54584 0.1826 3
 -2 5 1 0.08602 0.24399 5
 -2 5 1 -0.0803 0.29975 7
 1 -5 -1 2.89707 0.30969 8
 1 -5 -1 3.48192 0.37947 12
 1 -5 -1 2.8741 0.34293 2
 1 -5 -1 3.65769 0.55385 31
 1 -5 -1 3.5174 0.56997 32
 1 -5 -1 3.5474 0.43157 7
 1 -5 -1 4.07237 0.45336 33
 1 -5 -1 3.60092 0.31638 3
 1 -5 -1 2.45961 0.33218 7
 1 -5 -1 3.69871 0.35389 10
 -1 5 1 3.26101 0.3953 7
 -1 5 1 3.31202 0.31969 10
 -1 5 1 4.06306 0.43992 14
 -1 5 1 3.62642 0.52325 30
 -1 5 1 4.08816 0.43899 4
 -1 5 1 3.23476 0.34022 8
 -1 5 1 3.19292 0.37959 7
 -1 5 1 3.46512 0.42213 12
 0 -5 -1 8.41576 0.64833 7
 0 -5 -1 8.69615 0.3918 6
 0 -5 -1 8.5879 0.58774 2
 0 -5 -1 8.11874 0.56147 14
 0 -5 -1 8.60302 0.52477 10
 0 -5 -1 8.01486 0.69212 7
 0 -5 -1 9.20667 0.58415 12
 0 -5 -1 8.30293 0.53791 4
 0 -5 -1 8.34842 0.81947 31
 0 -5 -1 7.84545 0.6459 9
 0 5 1 8.08756 0.50038 10
 0 5 1 8.81655 0.80684 30
 0 5 1 9.27665 0.83979 24
 0 5 1 8.39015 0.60194 2
 0 5 1 9.11731 0.50761 4
 0 5 1 8.55264 0.65853 7
 0 5 1 8.13018 0.61375 7
 0 5 1 8.31084 0.6398 12
 0 5 1 8.87972 0.57032 8
 -1 -5 -1 47.8037 1.45226 7
 -1 -5 -1 49.171 1.30496 4
 -1 -5 -1 49.1121 1.06882 6
 -1 -5 -1 47.4469 1.60702 31
 -1 -5 -1 47.9471 1.42931 9
 -1 -5 -1 45.5826 1.25704 10
 -1 -5 -1 48.2014 1.45477 2
 1 5 1 46.7187 1.41588 7
 1 5 1 46.993 1.09155 17
 1 5 1 46.5794 1.28143 12
 1 5 1 46.8226 1.26962 4
 1 5 1 46.0959 1.21296 20
 1 5 1 45.3993 1.50981 24
 1 5 1 47.9166 1.45209 7
 1 5 1 49.9615 1.61588 30
 1 5 1 44.9814 1.45445 2
 -2 -5 -1 29.4642 1.11477 9
 -2 -5 -1 31.116 1.10142 7
 -2 -5 -1 29.2236 0.93338 20
 -2 -5 -1 28.5793 1.28855 24
 -2 -5 -1 29.5617 1.15118 13
 -2 -5 -1 30.2651 1.04852 2
 -2 -5 -1 29.396 1.10605 7
 -2 -5 -1 29.6169 0.92617 4
 -2 -5 -1 31.2179 1.35619 31
 2 5 1 29.2514 1.09551 7
 2 5 1 28.0705 1.19482 11
 2 5 1 30.3897 1.30544 30
 2 5 1 28.3071 1.15258 9
 2 5 1 29.6212 0.90955 4
 2 5 1 30.0691 1.13135 7
 2 5 1 29.3087 1.36156 32
 2 5 1 28.9136 0.99169 12
 2 5 1 30.0272 1.09063 2
 2 5 1 27.5776 1.19159 24
 -3 -5 -1 2.22552 0.42365 9
 -3 -5 -1 2.11231 0.3296 4
 -3 -5 -1 2.58059 0.44733 20
 -3 -5 -1 2.46591 0.47891 7
 -3 -5 -1 2.65677 0.58358 24
 -3 -5 -1 2.16916 0.33693 2
 -3 -5 -1 2.34524 0.47889 7
 -3 -5 -1 2.38347 0.64682 31
 -3 -5 -1 2.31404 0.49221 13
 3 5 1 1.94825 0.61605 32
 3 5 1 2.45604 0.4077 12
 3 5 1 2.4761 0.38637 15
 3 5 1 2.13612 0.45204 11
 3 5 1 2.3888 0.6372 30
 3 5 1 2.6189 0.47744 7
 3 5 1 2.87001 0.53008 24
 3 5 1 2.55265 0.49701 9
 3 5 1 2.42421 0.37862 2
 3 5 1 2.24571 0.47631 7
 -4 -5 -1 7.54605 0.64598 4
 -4 -5 -1 8.60875 0.92557 13
 -4 -5 -1 8.2064 0.64863 2
 -4 -5 -1 7.45707 0.76487 27
 -4 -5 -1 6.07209 0.61345 9
 -4 -5 -1 6.70022 0.88624 31
 -4 -5 -1 7.88387 0.78838 24
 -4 -5 -1 6.64453 0.62707 20
 -4 -5 -1 7.98688 0.85289 7
 -4 -5 -1 8.04383 0.87195 7
 4 5 1 9.04793 1.04739 32
 4 5 1 7.20189 0.7346 2
 4 5 1 7.3824 0.69539 7
 4 5 1 8.04266 0.67946 15
 4 5 1 8.69746 0.87006 7
 4 5 1 9.40611 0.92525 11
 4 5 1 5.8974 0.62356 9
 4 5 1 8.56876 0.94758 24
 4 5 1 8.04254 0.94873 30
 -5 -5 -1 1.21517 0.84025 31
 -5 -5 -1 0.84974 0.56122 7
 -5 -5 -1 1.12932 0.40284 4
 -5 -5 -1 0.68119 0.59139 20
 -5 -5 -1 1.02549 0.49601 9
 -5 -5 -1 0.99008 0.68309 24
 -5 -5 -1 0.43811 0.50182 13
 -5 -5 -1 0.40328 0.52835 27
 -5 -5 -1 1.08261 0.50791 7
 5 5 1 1.02726 0.53369 7
 5 5 1 0.23883 0.4818 11
 5 5 1 0.13768 0.514 7
 5 5 1 -0.3081 0.53884 9
 5 5 1 1.01659 0.84304 30
 5 5 1 0.22355 0.43276 23
 5 5 1 0.86861 0.44914 2
 5 5 1 0.56654 0.42312 5
 5 5 1 0.44081 0.87156 32
 5 5 1 0.40247 0.62861 24
 -6 -5 -1 32.9691 2.07616 31
 -6 -5 -1 35.2864 1.47024 3
 -6 -5 -1 32.2032 1.64083 7
 -6 -5 -1 34.9836 1.8693 24
 -6 -5 -1 32.4704 1.57494 9
 -6 -5 -1 32.9016 1.52083 13
 -6 -5 -1 36.3779 1.66263 7
 -6 -5 -1 31.1437 1.29705 4
 6 5 1 33.9822 1.33144 23
 6 5 1 33.5013 2.05568 30
 6 5 1 34.2449 2.1252 32
 6 5 1 33.8567 1.48284 2
 6 5 1 33.7642 1.62297 7
 6 5 1 30.8114 1.67589 9
 6 5 1 32.7317 1.44201 5
 6 5 1 34.3789 1.67907 7
 6 5 1 34.8656 1.6415 11
 6 5 1 33.0247 1.73372 24
 -7 -5 -1 29.3352 2.08113 24
 -7 -5 -1 30.0466 1.77451 7
 -7 -5 -1 31.3259 1.5512 3
 -7 -5 -1 30.7577 1.3981 4
 -7 -5 -1 29.233 1.86359 7
 -7 -5 -1 30.785 1.75465 9
 -7 -5 -1 28.1692 2.21501 31
 -7 -5 -1 33.4072 1.65981 13
 7 5 1 27.6831 1.38531 5
 7 5 1 26.6719 1.75271 11
 7 5 1 31.6939 1.84146 7
 7 5 1 29.2288 1.47559 21
 7 5 1 30.2819 2.23737 32
 7 5 1 30.1018 1.54528 23
 7 5 1 30.5687 1.86464 9
 7 5 1 30.6081 1.5484 2
 7 5 1 34.6303 1.87116 7
 7 5 1 29.7791 2.18013 30
 -8 -5 -1 3.93963 0.89244 13
 -8 -5 -1 4.53942 0.83398 3
 -8 -5 -1 5.91442 1.34748 24
 -8 -5 -1 7.08427 0.84412 4
 -8 -5 -1 6.51066 1.47943 31
 -8 -5 -1 6.09103 1.04946 9
 -8 -5 -1 6.2856 1.02524 7
 -8 -5 -1 4.94029 1.14351 7
 8 5 1 5.34874 0.83497 21
 8 5 1 4.52468 1.47827 32
 8 5 1 6.11122 0.90949 2
 8 5 1 4.95615 1.48562 30
 8 5 1 3.05803 0.7005 5
 8 5 1 7.10594 1.1316 7
 8 5 1 5.27259 1.05365 23
 8 5 1 5.52075 1.23728 11
 8 5 1 7.15337 1.25212 7
 8 5 1 5.14029 1.14705 9
 9 -6 -1 46.1552 2.58911 18
 9 -6 -1 43.4097 2.69947 33
 9 -6 -1 36.0244 2.61891 7
 9 -6 -1 39.666 2.19973 13
 9 -6 -1 39.1186 2.65073 32
 9 -6 -1 39.896 2.08336 12
 9 -6 -1 37.0965 1.90757 9
 9 -6 -1 44.5416 2.0831 5
 9 -6 -1 46.11 2.11746 7
 9 -6 -1 37.9525 1.7587 8
 -9 6 1 38.6368 1.89359 3
 -9 6 1 42.0294 2.00957 10
 -9 6 1 46.8723 2.3888 7
 -9 6 1 40.1934 2.14861 5
 -9 6 1 37.4306 2.32463 11
 -9 6 1 40.7461 1.70078 21
 -9 6 1 39.5352 2.15108 7
 -9 6 1 40.5481 2.41013 28
 8 -6 -1 26.1231 1.53985 12
 8 -6 -1 26.0448 1.93571 7
 8 -6 -1 27.4707 1.52301 9
 8 -6 -1 25.7859 2.18533 32
 8 -6 -1 29.3458 1.55978 5
 8 -6 -1 28.2851 1.59659 7
 8 -6 -1 24.7103 1.34556 8
 8 -6 -1 29.0028 2.1515 33
 8 -6 -1 23.0527 1.6216 13
 -8 6 1 27.2624 1.64948 7
 -8 6 1 30.7691 1.85254 11
 -8 6 1 29.7661 1.87871 7
 -8 6 1 27.7595 1.43876 3
 -8 6 1 28.4882 1.59255 10
 -8 6 1 29.4407 1.66306 5
 -8 6 1 26.2826 1.8476 28
 -8 6 1 29.3058 1.50422 21
 7 -6 -1 5.51295 0.69818 13
 7 -6 -1 4.55326 0.87951 7
 7 -6 -1 4.3954 0.60332 5
 7 -6 -1 4.82161 1.14272 32
 7 -6 -1 2.75928 0.50491 8
 7 -6 -1 5.38329 0.78413 7
 7 -6 -1 7.16034 1.0823 33
 7 -6 -1 4.72093 0.6503 9
 7 -6 -1 4.2 0.65352 12
 -7 6 1 4.31863 0.86462 7
 -7 6 1 3.52675 0.6535 5
 -7 6 1 5.15299 0.80614 7
 -7 6 1 5.05779 0.82893 11
 -7 6 1 4.16999 0.57417 3
 -7 6 1 4.50604 0.66801 10
 -7 6 1 5.12582 0.88864 28
 6 -6 -1 8.80477 0.81129 7
 6 -6 -1 8.49344 0.76653 19
 6 -6 -1 9.22002 0.94899 7
 6 -6 -1 7.70652 0.85094 5
 6 -6 -1 8.56447 1.16493 32
 6 -6 -1 9.93132 0.83848 8
 6 -6 -1 9.43499 0.939 12
 6 -6 -1 9.19532 0.93927 13
 6 -6 -1 9.15601 0.96637 33
 -6 6 1 8.23674 0.74438 8
 -6 6 1 7.8971 0.76329 10
 -6 6 1 8.76965 0.83201 28
 -6 6 1 9.35334 1.11819 11
 -6 6 1 8.84797 0.91815 5
 -6 6 1 8.33365 0.77247 3
 -6 6 1 9.03593 1.08013 7
 -6 6 1 9.10067 1.07292 7
 5 -6 -1 65.8375 1.95369 19
 5 -6 -1 66.5027 1.86702 3
 5 -6 -1 67.8261 2.37339 32
 5 -6 -1 67.1939 1.91694 12
 5 -6 -1 65.0732 1.81265 8
 5 -6 -1 64.7767 1.74285 13
 5 -6 -1 65.6986 1.8809 33
 5 -6 -1 64.9923 2.10714 7
 5 -6 -1 67.5352 2.05018 7
 -5 6 1 63.0838 2.03508 11
 -5 6 1 66.0418 2.00785 10
 -5 6 1 65.6747 1.97121 28
 -5 6 1 66.7533 1.86913 8
 -5 6 1 65.1268 1.91961 5
 -5 6 1 66.1831 2.04073 7
 -5 6 1 64.5332 1.8201 3
 -5 6 1 66.523 2.0922 7
 4 -6 -1 8.39399 0.9509 32
 4 -6 -1 4.85617 0.77463 31
 4 -6 -1 6.53808 0.59516 3
 4 -6 -1 6.23271 0.6338 13
 4 -6 -1 6.65232 0.65259 7
 4 -6 -1 6.79635 0.69375 7
 4 -6 -1 7.84946 0.6737 33
 4 -6 -1 7.88651 0.66322 8
 4 -6 -1 6.85227 0.65494 19
 -4 6 1 7.56334 0.71555 8
 -4 6 1 6.64369 0.65671 5
 -4 6 1 7.71982 0.77993 10
 -4 6 1 6.26081 0.75555 7
 -4 6 1 6.35718 0.43571 16
 -4 6 1 5.78544 0.61016 7
 -4 6 1 7.08898 0.5379 3
 3 -6 -1 477.39 9.55283 8
 3 -6 -1 471.809 10.496 3
 3 -6 -1 470.143 10.8226 28
 3 -6 -1 480.281 9.21777 33
 3 -6 -1 465.233 10.654 31
 3 -6 -1 477.263 10.6641 7
 3 -6 -1 477.005 10.684 7
 3 -6 -1 473.169 9.54361 12
 3 -6 -1 473.138 11.6072 2
 3 -6 -1 470.118 10.4099 32
 -3 6 1 467.498 10.4949 30
 -3 6 1 477.714 10.4838 3
 -3 6 1 474.817 10.3011 10
 -3 6 1 471.261 9.55311 12
 -3 6 1 466.44 9.55554 8
 -3 6 1 476.504 10.658 7
 -3 6 1 466.46 10.6755 7
 -3 6 1 472.637 10.6893 5
 2 -6 -1 24.1024 0.8837 33
 2 -6 -1 22.6644 1.2482 32
 2 -6 -1 20.8144 1.04243 28
 2 -6 -1 21.0234 0.71299 3
 2 -6 -1 21.5863 1.20589 31
 2 -6 -1 20.9975 0.79829 8
 2 -6 -1 22.1948 0.91146 12
 2 -6 -1 21.1229 0.89054 10
 2 -6 -1 20.7143 0.97304 7
 2 -6 -1 21.6525 1.02222 7
 2 -6 -1 20.1867 0.93496 2
 -2 6 1 19.8887 0.99369 7
 -2 6 1 20.2194 0.78961 14
 -2 6 1 21.1766 1.1567 30
 -2 6 1 23.1883 0.89625 10
 -2 6 1 20.5045 0.9655 7
 -2 6 1 21.2614 0.85432 8
 -2 6 1 20.7732 0.8584 4
 -2 6 1 20.4326 0.93232 12
 1 -6 -1 270.033 6.3028 7
 1 -6 -1 268.703 6.84135 2
 1 -6 -1 278.062 6.02227 10
 1 -6 -1 273.225 6.32891 7
 1 -6 -1 275.562 5.63732 12
 1 -6 -1 269.693 6.38486 31
 1 -6 -1 273.146 6.10648 3
 -1 6 1 275.843 6.30164 30
 -1 6 1 271.22 5.6237 8
 -1 6 1 275.063 6.2089 4
 -1 6 1 272.208 5.65052 12
 -1 6 1 271.886 6.32432 7
 -1 6 1 268.799 5.81967 14
 -1 6 1 277.044 6.31603 7
 -1 6 1 271.61 5.9991 10
 0 -6 -1 6.7105 0.69405 9
 0 -6 -1 8.22006 0.8722 31
 0 -6 -1 7.13047 0.69277 7
 0 -6 -1 7.30295 0.61433 12
 0 -6 -1 8.59611 0.42594 6
 0 -6 -1 8.15711 0.58952 4
 0 -6 -1 7.18747 0.58699 14
 0 -6 -1 8.04494 0.58927 10
 0 -6 -1 6.76816 0.75817 7
 0 -6 -1 8.5273 0.61086 2
 0 6 1 6.65078 0.62603 2
 0 6 1 8.20415 0.61049 8
 0 6 1 6.06563 0.65714 24
 0 6 1 7.24706 0.54188 4
 0 6 1 8.52301 0.92096 30
 0 6 1 7.2246 0.67903 12
 0 6 1 8.27147 0.70462 7
 0 6 1 7.16547 0.70392 7
 -1 -6 -1 171.611 4.09986 9
 -1 -6 -1 177.773 4.27716 7
 -1 -6 -1 177.907 4.41056 31
 -1 -6 -1 182.431 3.57113 6
 -1 -6 -1 174.387 4.52771 2
 -1 -6 -1 176.939 4.25408 7
 -1 -6 -1 175.898 3.95454 14
 -1 -6 -1 176.987 4.09326 4
 -1 -6 -1 173.36 3.9585 10
 1 6 1 180.893 4.35603 30
 1 6 1 169.543 4.2058 24
 1 6 1 176.219 3.76566 12
 1 6 1 173.663 4.24271 7
 1 6 1 171.336 3.73443 20
 1 6 1 173.653 4.21512 7
 1 6 1 173.275 4.53856 2
 1 6 1 175.177 4.07092 4
 1 6 1 177.712 3.59938 17
 -2 -6 -1 55.4298 1.71474 7
 -2 -6 -1 54.8068 1.96108 31
 -2 -6 -1 54.7263 1.50355 4
 -2 -6 -1 55.3055 1.68887 7
 -2 -6 -1 53.3356 1.66834 9
 -2 -6 -1 54.3429 1.67924 13
 -2 -6 -1 54.3601 1.68141 2
 2 6 1 53.2586 1.69256 7
 2 6 1 52.7244 1.89469 30
 2 6 1 54.6636 1.68612 7
 2 6 1 54.0335 1.69834 2
 2 6 1 54.0492 1.95937 32
 2 6 1 54.4179 1.4805 4
 2 6 1 53.1835 1.49352 12
 2 6 1 52.8534 1.76531 24
 -3 -6 -1 35.9805 1.68072 31
 -3 -6 -1 34.6772 1.15703 4
 -3 -6 -1 37.9861 1.37501 9
 -3 -6 -1 37.1991 1.18304 20
 -3 -6 -1 36.6411 1.41434 7
 -3 -6 -1 37.8394 1.40921 7
 -3 -6 -1 36.4955 1.29892 2
 -3 -6 -1 38.0475 1.426 13
 -3 -6 -1 36.7504 1.60784 24
 3 6 1 37.0175 1.38315 7
 3 6 1 35.87 1.40915 7
 3 6 1 37.2544 1.2487 12
 3 6 1 35.8309 1.48328 24
 3 6 1 38.4266 1.73154 32
 3 6 1 35.5609 1.35285 2
 3 6 1 36.3797 1.65765 30
 3 6 1 36.6575 1.46313 11
 -4 -6 -1 16.7963 1.0148 9
 -4 -6 -1 13.4376 1.44421 31
 -4 -6 -1 16.1719 1.12719 7
 -4 -6 -1 16.8674 0.99561 20
 -4 -6 -1 16.1799 1.01136 27
 -4 -6 -1 15.0701 0.89301 2
 -4 -6 -1 14.6934 1.10211 13
 -4 -6 -1 16.1485 1.10449 7
 -4 -6 -1 16.6924 0.85117 4
 -4 -6 -1 15.0249 1.37494 24
 4 6 1 13.2773 1.36962 30
 4 6 1 17.2219 1.25071 24
 4 6 1 15.8608 1.1919 9
 4 6 1 14.8314 0.85019 15
 4 6 1 17.4925 1.15661 7
 4 6 1 15.9084 1.02797 12
 4 6 1 14.0792 0.98643 2
 4 6 1 15.9462 1.15433 11
 4 6 1 16.7379 1.16379 7
 4 6 1 14.243 1.46158 32
 -5 -6 -1 5.35072 0.55384 4
 -5 -6 -1 6.43302 0.75389 27
 -5 -6 -1 6.38179 0.73458 20
 -5 -6 -1 6.93649 0.74952 9
 -5 -6 -1 5.31587 0.82462 7
 -5 -6 -1 4.91554 0.71784 13
 -5 -6 -1 5.93755 0.91328 24
 -5 -6 -1 4.79201 0.67866 7
 -5 -6 -1 6.22735 1.12077 31
 5 6 1 5.82449 0.79319 7
 5 6 1 4.73571 0.72 7
 5 6 1 5.24881 0.64526 2
 5 6 1 5.13441 1.14696 32
 5 6 1 5.80374 0.7716 9
 5 6 1 5.02306 0.65681 5
 5 6 1 5.68283 0.7613 11
 5 6 1 5.39316 1.08739 30
 5 6 1 7.73553 0.87467 24
 -6 -6 -1 22.0817 1.98045 31
 -6 -6 -1 20.4004 1.84154 24
 -6 -6 -1 21.2099 1.53627 7
 -6 -6 -1 22.6472 1.45457 9
 -6 -6 -1 19.8798 1.45916 20
 -6 -6 -1 21.6967 1.1659 4
 -6 -6 -1 21.893 1.39339 13
 -6 -6 -1 24.5875 1.52247 7
 6 6 1 20.4137 1.47269 7
 6 6 1 19.4699 1.51802 7
 6 6 1 23.183 1.74847 24
 6 6 1 21.4537 1.26303 5
 6 6 1 22.1955 1.34947 2
 6 6 1 17.9433 1.85301 30
 6 6 1 20.0068 1.58741 9
 6 6 1 20.7933 1.97679 32
 6 6 1 19.9846 1.42769 11
 -7 -6 -1 20.6118 1.64194 7
 -7 -6 -1 16.5301 1.7492 20
 -7 -6 -1 17.7505 1.31634 4
 -7 -6 -1 20.2187 2.22871 31
 -7 -6 -1 17.6281 1.43375 3
 -7 -6 -1 15.6744 1.49275 13
 -7 -6 -1 19.3577 1.8607 7
 -7 -6 -1 22.1005 2.18809 24
 -7 -6 -1 17.987 1.74985 9
 7 6 1 19.1031 1.86104 9
 7 6 1 18.2453 1.70897 11
 7 6 1 18.085 1.30523 23
 7 6 1 18.7266 1.7768 7
 7 6 1 20.0108 1.50956 2
 7 6 1 15.0277 1.23276 5
 7 6 1 19.7041 2.09836 30
 7 6 1 20.6015 2.20404 32
 7 6 1 23.2873 1.73425 7
 -8 -6 -1 1.45781 0.95856 7
 -8 -6 -1 5.76763 1.42398 7
 -8 -6 -1 3.88144 0.93419 3
 -8 -6 -1 4.20493 0.86203 4
 -8 -6 -1 3.76792 1.43303 31
 -8 -6 -1 4.96621 1.1737 9
 -8 -6 -1 0.32523 0.90934 13
 -8 -6 -1 1.09719 1.27249 20
 -8 -6 -1 3.98016 1.52142 24
 8 6 1 2.99479 1.60463 32
 8 6 1 3.87995 0.69761 5
 8 6 1 2.82279 1.25026 9
 8 6 1 4.80458 1.48467 30
 8 6 1 3.77132 0.95038 2
 8 6 1 4.64945 0.99577 23
 8 6 1 3.18547 1.25916 11
 8 6 1 2.29543 1.28836 7
 8 6 1 3.37984 0.95671 21
 8 6 1 2.69825 1.10585 7
 9 -7 -1 18.9051 1.50927 8
 9 -7 -1 16.5331 1.89541 32
 9 -7 -1 21.0252 2.47682 7
 9 -7 -1 21.2549 1.79058 5
 9 -7 -1 22.6019 2.01744 13
 9 -7 -1 23.1097 2.47313 18
 9 -7 -1 24.2544 1.92277 33
 9 -7 -1 20.5544 1.82032 7
 9 -7 -1 22.031 1.78268 12
 9 -7 -1 19.4786 1.79089 9
 -9 7 1 19.2746 1.64162 3
 -9 7 1 23.7417 1.76536 21
 -9 7 1 26.5056 2.2336 7
 -9 7 1 14.6187 1.67375 10
 -9 7 1 24.5699 1.96765 5
 -9 7 1 18.6752 2.18975 11
 -9 7 1 24.093 2.11916 28
 -9 7 1 20.8153 2.03774 7
 8 -7 -1 21.1947 1.50792 5
 8 -7 -1 20.0847 1.32736 8
 8 -7 -1 23.4583 1.6041 13
 8 -7 -1 22.2144 1.48998 9
 8 -7 -1 19.6443 1.98638 7
 8 -7 -1 23.344 1.46748 12
 8 -7 -1 22.9618 1.5932 7
 8 -7 -1 21.5497 2.16716 32
 8 -7 -1 21.6003 2.10022 33
 -8 7 1 24.3402 1.79818 7
 -8 7 1 20.5901 1.82563 11
 -8 7 1 19.2361 1.37183 3
 -8 7 1 23.653 1.72494 28
 -8 7 1 21.7459 1.63604 5
 -8 7 1 20.0981 1.54153 10
 -8 7 1 21.4313 1.6401 7
 7 -7 -1 1.91286 1.13133 32
 7 -7 -1 2.78133 0.94571 7
 7 -7 -1 2.34869 0.62138 12
 7 -7 -1 3.93253 0.72376 7
 7 -7 -1 2.71161 0.66593 13
 7 -7 -1 0.48074 0.9778 33
 7 -7 -1 2.21602 0.56192 8
 7 -7 -1 1.65707 0.6096 5
 -7 7 1 1.5245 0.68417 7
 -7 7 1 1.61942 0.61162 10
 -7 7 1 2.71221 0.63959 5
 -7 7 1 1.74733 0.52932 3
 -7 7 1 2.86066 0.79183 28
 -7 7 1 2.6172 0.84525 7
 -7 7 1 2.14466 0.79353 11
 6 -7 -1 4.71274 0.71256 19
 6 -7 -1 4.4116 0.61386 12
 6 -7 -1 4.46087 0.59644 3
 6 -7 -1 5.01141 0.89354 33
 6 -7 -1 4.73647 0.62196 13
 6 -7 -1 5.45919 0.87051 7
 6 -7 -1 4.09677 0.67575 7
 6 -7 -1 4.60353 0.62098 8
 6 -7 -1 4.82305 1.05194 32
 -6 7 1 4.69553 0.67883 8
 -6 7 1 3.27991 0.62563 7
 -6 7 1 3.26101 0.58525 10
 -6 7 1 4.305 0.62283 5
 -6 7 1 4.4423 0.71983 28
 -6 7 1 4.4413 0.74007 11
 -6 7 1 5.79035 0.82011 7
 -6 7 1 4.73333 0.55598 3
 5 -7 -1 45.4954 1.45287 3
 5 -7 -1 43.1961 1.53038 33
 5 -7 -1 44.7809 1.64262 7
 5 -7 -1 45.1942 1.41559 13
 5 -7 -1 47.1816 1.78586 7
 5 -7 -1 43.9739 1.46863 8
 5 -7 -1 41.2979 1.97727 32
 5 -7 -1 43.4787 1.63566 19
 5 -7 -1 42.9912 1.56123 12
 -5 7 1 44.1061 1.38906 3
 -5 7 1 47.1241 1.73673 7
 -5 7 1 44.5484 1.61861 10
 -5 7 1 43.7234 1.51881 8
 -5 7 1 42.0419 1.49543 5
 -5 7 1 43.8618 1.67478 7
 4 -7 -1 22.9505 1.22805 7
 4 -7 -1 22.9175 0.92957 3
 4 -7 -1 20.6728 1.41453 31
 4 -7 -1 23.5138 1.0859 12
 4 -7 -1 23.3133 1.13687 7
 4 -7 -1 20.0668 1.06952 33
 4 -7 -1 22.9911 0.95777 13
 4 -7 -1 24.1515 1.00144 8
 4 -7 -1 22.7309 1.45192 32
 4 -7 -1 23.3675 1.09491 2
 -4 7 1 23.335 1.07264 8
 -4 7 1 22.5176 1.1562 7
 -4 7 1 22.6143 0.80146 16
 -4 7 1 22.6705 1.09948 10
 -4 7 1 23.7017 1.03152 5
 -4 7 1 23.6293 0.89953 3
 -4 7 1 23.2326 1.19978 7
 3 -7 -1 2.46417 0.46594 7
 3 -7 -1 3.04261 0.41734 8
 3 -7 -1 3.55184 0.52935 10
 3 -7 -1 3.60325 0.53207 33
 3 -7 -1 4.02346 0.59856 28
 3 -7 -1 2.62779 0.40696 2
 3 -7 -1 4.10265 0.70974 31
 3 -7 -1 3.45484 0.47436 12
 3 -7 -1 2.70139 0.7033 32
 3 -7 -1 3.95102 0.38061 3
 3 -7 -1 3.08705 0.4824 7
 -3 7 1 3.80617 0.73518 30
 -3 7 1 3.26911 0.49396 7
 -3 7 1 3.88458 0.44929 5
 -3 7 1 3.43001 0.35087 3
 -3 7 1 2.80792 0.44823 10
 -3 7 1 2.3244 0.36137 4
 -3 7 1 3.40925 0.46563 8
 -3 7 1 2.59562 0.49359 12
 -3 7 1 3.08155 0.49962 7
 2 -7 -1 20.1611 1.10069 7
 2 -7 -1 22.2999 1.31668 31
 2 -7 -1 20.397 1.18523 28
 2 -7 -1 22.1547 0.77787 3
 2 -7 -1 21.0195 0.97118 10
 2 -7 -1 21.8363 0.97421 33
 2 -7 -1 22.7049 0.98693 12
 2 -7 -1 21.6143 0.86743 8
 2 -7 -1 21.6055 1.02448 7
 2 -7 -1 23.2735 1.33129 32
 2 -7 -1 22.233 1.01428 2
 -2 7 1 21.4527 0.93226 10
 -2 7 1 20.7612 0.92209 4
 -2 7 1 20.32 1.25117 30
 -2 7 1 22.6397 0.9264 8
 -2 7 1 22.2122 1.05704 7
 -2 7 1 22.5256 1.03207 12
 -2 7 1 21.4268 0.84128 14
 -2 7 1 20.317 1.06844 7
 1 -7 -1 42.285 1.72293 31
 1 -7 -1 43.5632 1.11716 6
 1 -7 -1 41.0167 1.30911 12
 1 -7 -1 42.7813 1.31869 10
 1 -7 -1 42.085 1.18046 3
 1 -7 -1 41.8453 1.45319 7
 1 -7 -1 41.9933 1.50393 7
 1 -7 -1 42.7751 1.47017 2
 -1 7 1 42.8717 1.34832 12
 -1 7 1 42.7171 1.27479 8
 -1 7 1 39.904 1.6483 30
 -1 7 1 43.0171 1.49497 7
 -1 7 1 41.0383 1.27133 10
 -1 7 1 42.7473 1.32328 4
 -1 7 1 41.9657 1.47449 7
 0 -7 -1 212.807 4.58653 14
 0 -7 -1 209.143 5.01179 7
 0 -7 -1 212.85 5.37431 2
 0 -7 -1 207.446 4.44268 12
 0 -7 -1 205.159 5.15362 31
 0 -7 -1 208.071 4.83323 9
 0 -7 -1 211.527 4.87886 4
 0 -7 -1 207.769 4.69605 10
 0 -7 -1 213.249 4.25996 6
 0 -7 -1 209.469 5.03993 7
 0 7 1 205.517 4.84175 4
 0 7 1 208.747 4.43472 8
 0 7 1 203.505 4.96086 7
 0 7 1 205.879 4.99532 7
 0 7 1 208.112 4.99761 24
 0 7 1 209.662 5.38327 2
 0 7 1 207.546 5.07321 30
 0 7 1 202.788 4.43197 20
 0 7 1 209.172 4.46512 12
 -1 -7 -1 149.815 3.43713 14
 -1 -7 -1 148.859 3.77212 7
 -1 -7 -1 152.01 3.04529 6
 -1 -7 -1 146.021 3.61146 9
 -1 -7 -1 151.813 3.75233 7
 -1 -7 -1 145.967 3.44115 10
 -1 -7 -1 145.076 3.94725 31
 -1 -7 -1 149.184 3.56471 4
 -1 -7 -1 146.035 3.93656 2
 1 7 1 147.371 3.70316 7
 1 7 1 150.842 3.73791 7
 1 7 1 147.213 3.96176 2
 1 7 1 146.954 3.75901 24
 1 7 1 148.57 3.88694 30
 1 7 1 149.195 3.31597 12
 1 7 1 143.705 3.22657 20
 1 7 1 148.632 3.53951 4
 -2 -7 -1 15.7749 1.01489 7
 -2 -7 -1 17.5577 0.89684 10
 -2 -7 -1 18.1639 1.05622 7
 -2 -7 -1 17.253 1.03735 9
 -2 -7 -1 16.8465 0.87366 2
 -2 -7 -1 16.8094 0.83708 4
 -2 -7 -1 17.0215 1.08074 13
 -2 -7 -1 15.7674 1.33733 31
 2 7 1 17.6168 1.03867 7
 2 7 1 17.1448 0.74316 17
 2 7 1 16.7454 0.80487 4
 2 7 1 16.3239 1.01335 7
 2 7 1 15.6516 1.18562 24
 2 7 1 17.5552 0.94363 2
 2 7 1 17.4933 0.96142 12
 2 7 1 17.109 1.40104 32
 2 7 1 15.3933 1.27705 30
 -3 -7 -1 14.7871 0.82672 4
 -3 -7 -1 13.0615 0.86159 2
 -3 -7 -1 15.2564 1.04354 9
 -3 -7 -1 14.4935 0.87107 20
 -3 -7 -1 13.5024 1.05567 7
 -3 -7 -1 12.4075 1.07672 13
 -3 -7 -1 14.2697 1.04942 7
 -3 -7 -1 14.0887 1.41783 31
 3 7 1 13.7599 0.95097 2
 3 7 1 13.3555 1.09267 11
 3 7 1 12.6203 1.2183 24
 3 7 1 11.5534 1.32087 30
 3 7 1 14.1764 0.98849 12
 3 7 1 13.3638 1.45207 32
 3 7 1 11.351 1.06251 7
 3 7 1 14.5639 1.0611 7
 3 7 1 14.7409 0.78983 4
 -4 -7 -1 1.03498 0.56981 7
 -4 -7 -1 -0.6667 0.72431 24
 -4 -7 -1 0.1886 0.52053 20
 -4 -7 -1 0.04688 0.49981 13
 -4 -7 -1 0.00916 0.58488 7
 -4 -7 -1 -0.0365 0.39426 4
 -4 -7 -1 0.26683 0.4409 9
 -4 -7 -1 0.71527 0.80259 31
 -4 -7 -1 0.59627 0.42123 2
 4 7 1 -0.6639 0.45875 2
 4 7 1 0.39307 0.55207 11
 4 7 1 -0.4936 0.64363 24
 4 7 1 0.73187 0.53721 12
 4 7 1 0.61777 0.91787 32
 4 7 1 0.31134 0.48048 15
 4 7 1 0.27211 0.55004 7
 4 7 1 0.04395 0.56487 7
 4 7 1 0.68885 0.80329 30
 -5 -7 -1 28.8031 1.5214 9
 -5 -7 -1 29.6302 1.40424 20
 -5 -7 -1 28.4991 1.42493 27
 -5 -7 -1 28.4535 1.526 13
 -5 -7 -1 31.7631 1.63919 7
 -5 -7 -1 29.4997 1.56133 7
 -5 -7 -1 30.732 1.28378 4
 -5 -7 -1 28.5172 2.00713 31
 -5 -7 -1 29.4515 1.91968 24
 5 7 1 26.5536 1.1679 15
 5 7 1 29.2075 1.60795 7
 5 7 1 29.2676 1.47789 2
 5 7 1 29.9309 1.73971 24
 5 7 1 28.2155 1.98189 30
 5 7 1 29.7123 2.04318 32
 5 7 1 30.4935 1.46994 12
 5 7 1 30.2222 1.50412 11
 5 7 1 29.3682 1.58893 7
 -6 -7 -1 9.04704 0.99264 13
 -6 -7 -1 10.8812 0.89455 27
 -6 -7 -1 10.3989 1.1065 4
 -6 -7 -1 11.4967 1.05727 20
 -6 -7 -1 9.47725 1.29402 24
 -6 -7 -1 9.53516 1.01172 9
 -6 -7 -1 7.03701 1.34282 31
 -6 -7 -1 9.78064 1.06413 7
 -6 -7 -1 12.3004 1.42672 7
 6 7 1 10.6373 1.10905 7
 6 7 1 12.2965 1.43314 7
 6 7 1 10.8395 1.54108 32
 6 7 1 10.9566 0.99272 12
 6 7 1 9.83678 1.2979 2
 6 7 1 10.3609 1.20994 24
 6 7 1 9.39032 0.99015 11
 6 7 1 11.3515 1.55252 30
 6 7 1 10.9781 1.10622 5
 -7 -7 -1 2.50583 0.74178 13
 -7 -7 -1 2.56824 1.32123 31
 -7 -7 -1 3.11409 0.97959 9
 -7 -7 -1 1.40557 1.31358 24
 -7 -7 -1 4.56064 1.22014 7
 -7 -7 -1 2.9898 0.87019 3
 -7 -7 -1 3.79116 1.0017 7
 -7 -7 -1 2.58838 0.75865 4
 -7 -7 -1 3.24023 1.08251 20
 7 7 1 3.05404 1.36307 30
 7 7 1 3.57153 1.0229 11
 7 7 1 2.59997 1.39395 32
 7 7 1 2.64352 0.58602 5
 7 7 1 2.13708 1.10735 7
 7 7 1 3.76515 0.97179 7
 7 7 1 2.59323 0.8446 2
 7 7 1 4.74901 1.25478 24
 9 -8 -1 2.88154 1.50799 7
 9 -8 -1 -0.91 0.88089 8
 9 -8 -1 -0.7855 1.40978 32
 9 -8 -1 -0.7252 1.04344 13
 9 -8 -1 0.99356 1.00586 9
 9 -8 -1 -0.4771 1.48038 33
 9 -8 -1 -0.3371 0.92825 7
 -9 8 1 1.7021 1.27726 11
 -9 8 1 -0.2888 1.09284 21
 -9 8 1 -0.6275 0.85563 3
 -9 8 1 -2.5178 1.09933 28
 -9 8 1 0.30168 1.05255 7
 -9 8 1 0.49876 0.96316 10
 -9 8 1 -2.4339 0.97478 5
 -9 8 1 -0.7092 1.08042 7
 8 -8 -1 2.65728 0.77444 8
 8 -8 -1 1.89023 1.17298 7
 8 -8 -1 2.63989 0.91812 7
 8 -8 -1 1.96332 0.82458 9
 8 -8 -1 3.02703 1.39286 32
 8 -8 -1 3.06183 0.87231 13
 8 -8 -1 1.75743 1.25248 33
 8 -8 -1 2.58425 0.6763 12
 -8 8 1 1.95753 0.94703 7
 -8 8 1 2.46365 1.04913 11
 -8 8 1 3.46574 0.91377 7
 -8 8 1 2.72442 0.74804 3
 -8 8 1 1.83916 0.76225 10
 -8 8 1 2.81523 0.85229 5
 7 -8 -1 2.06766 0.48024 22
 7 -8 -1 2.45225 0.70165 7
 7 -8 -1 1.46863 0.6411 12
 7 -8 -1 2.13827 0.71164 13
 7 -8 -1 2.95123 0.88091 19
 7 -8 -1 1.19823 1.02538 33
 7 -8 -1 2.08991 0.63092 8
 7 -8 -1 1.67831 1.10753 32
 7 -8 -1 1.84957 0.92421 7
 -7 8 1 3.37431 0.7329 5
 -7 8 1 2.75694 0.86337 11
 -7 8 1 1.74511 0.55917 3
 -7 8 1 1.29738 0.64782 10
 -7 8 1 2.34256 0.80653 7
 -7 8 1 2.34166 0.75846 7
 -7 8 1 1.41891 0.67489 8
 6 -8 -1 10.148 1.07697 12
 6 -8 -1 11.5149 1.3362 32
 6 -8 -1 11.7791 1.05795 33
 6 -8 -1 10.8217 1.05943 13
 6 -8 -1 10.1007 1.13045 7
 6 -8 -1 9.96758 1.1042 2
 6 -8 -1 10.9692 0.97428 19
 6 -8 -1 8.53245 0.9772 7
 6 -8 -1 11.1954 1.01467 8
 6 -8 -1 9.11058 1.02757 3
 -6 8 1 9.77217 1.15684 7
 -6 8 1 9.36666 0.86565 3
 -6 8 1 12.5689 1.19288 10
 -6 8 1 10.5051 1.06615 5
 -6 8 1 10.0683 0.90987 8
 -6 8 1 10.6648 1.04787 7
 -6 8 1 9.0505 0.94142 11
 5 -8 -1 17.7682 1.35703 7
 5 -8 -1 15.431 1.07311 2
 5 -8 -1 15.9586 0.98535 3
 5 -8 -1 16.3463 1.20028 33
 5 -8 -1 16.4979 1.19478 7
 5 -8 -1 15.7101 1.08328 12
 5 -8 -1 16.2967 1.3131 19
 5 -8 -1 15.2154 1.58861 31
 5 -8 -1 16.9833 1.03239 8
 5 -8 -1 15.3905 1.61061 32
 5 -8 -1 15.2043 1.03083 13
 -5 8 1 18.713 1.30013 7
 -5 8 1 16.9782 1.14284 8
 -5 8 1 16.9884 0.92075 3
 -5 8 1 15.3727 1.04528 4
 -5 8 1 16.2463 1.02258 5
 -5 8 1 15.8324 0.68862 16
 -5 8 1 15.0904 1.14224 10
 -5 8 1 15.4948 1.15846 7
 4 -8 -1 36.5796 1.89913 32
 4 -8 -1 40.5454 1.35085 13
 4 -8 -1 39.6737 1.29497 3
 4 -8 -1 39.2599 1.5455 7
 4 -8 -1 40.484 1.35716 33
 4 -8 -1 36.987 1.43309 12
 4 -8 -1 40.0904 1.6522 7
 4 -8 -1 39.7473 1.54185 2
 4 -8 -1 42.6926 1.38979 8
 4 -8 -1 38.767 1.95313 31
 -4 8 1 39.4111 1.40111 5
 -4 8 1 39.8121 1.4263 8
 -4 8 1 40.3682 1.50262 10
 -4 8 1 39.7793 1.26249 3
 -4 8 1 35.0059 1.40288 4
 -4 8 1 38.5435 1.59955 7
 -4 8 1 40.0693 1.58007 7
 3 -8 -1 39.5459 1.55354 7
 3 -8 -1 40.2599 1.30026 8
 3 -8 -1 36.8143 1.81538 32
 3 -8 -1 38.1722 1.21742 3
 3 -8 -1 36.6008 1.35666 12
 3 -8 -1 39.1643 1.5845 28
 3 -8 -1 41.1399 1.49629 2
 3 -8 -1 38.6446 1.47927 7
 3 -8 -1 39.7837 1.29537 33
 3 -8 -1 38.3734 1.47307 10
 3 -8 -1 40.5699 1.8807 31
 -3 8 1 39.5886 1.37159 5
 -3 8 1 39.2028 1.35119 8
 -3 8 1 40.7211 1.50479 7
 -3 8 1 39.1788 1.45345 12
 -3 8 1 39.7136 1.85084 30
 -3 8 1 40.6885 1.56104 7
 -3 8 1 37.2059 1.24361 14
 -3 8 1 38.8582 1.38193 4
 -3 8 1 38.6394 1.3956 10
 2 -8 -1 1.82409 0.8008 32
 2 -8 -1 0.60785 0.66811 28
 2 -8 -1 1.47488 0.42865 2
 2 -8 -1 1.07041 0.44361 7
 2 -8 -1 0.53025 0.71571 31
 2 -8 -1 2.18904 0.54391 7
 2 -8 -1 1.10749 0.4739 10
 2 -8 -1 0.96277 0.2999 3
 2 -8 -1 1.46017 0.4633 12
 -2 8 1 1.29038 0.39172 14
 -2 8 1 1.06291 0.34896 4
 -2 8 1 1.62851 0.52208 12
 -2 8 1 1.47779 0.4461 7
 -2 8 1 1.33042 0.72438 30
 -2 8 1 1.21098 0.42012 8
 -2 8 1 1.64115 0.27929 22
 -2 8 1 1.62134 0.52568 7
 -2 8 1 1.52761 0.43544 10
 1 -8 -1 6.72797 0.64313 9
 1 -8 -1 7.2475 0.62605 12
 1 -8 -1 6.58089 0.54793 3
 1 -8 -1 6.13804 0.57361 6
 1 -8 -1 8.0686 0.76142 7
 1 -8 -1 7.53225 0.83725 7
 1 -8 -1 7.32218 0.94637 31
 1 -8 -1 7.00597 0.78827 10
 1 -8 -1 7.9377 0.7467 2
 -1 8 1 6.84891 0.66794 7
 -1 8 1 5.49268 0.7357 24
 -1 8 1 6.57989 0.6744 7
 -1 8 1 5.53731 0.835 30
 -1 8 1 7.45191 0.61054 8
 -1 8 1 7.3649 0.72024 10
 -1 8 1 8.15671 0.86968 12
 -1 8 1 8.02861 0.69605 4
 0 -8 -1 132.977 3.10532 14
 0 -8 -1 133.192 3.65841 2
 0 -8 -1 132.085 3.73806 31
 0 -8 -1 132.204 3.48179 7
 0 -8 -1 129.984 2.82117 6
 0 -8 -1 132.968 3.21031 10
 0 -8 -1 133.167 3.08911 12
 0 -8 -1 135.523 3.38135 9
 0 -8 -1 137.121 3.54093 7
 0 -8 -1 138.14 3.35107 4
 0 8 1 130.167 3.6623 30
 0 8 1 136.016 3.70214 2
 0 8 1 131.835 3.29452 4
 0 8 1 137.816 3.48507 7
 0 8 1 130.622 3.10785 12
 0 8 1 137.041 3.57648 24
 0 8 1 130.462 3.0107 20
 0 8 1 132.693 3.44511 7
 0 8 1 136.458 3.07333 8
 -1 -8 -1 301.426 7.18455 7
 -1 -8 -1 301.939 6.72506 10
 -1 -8 -1 292.282 7.29099 31
 -1 -8 -1 303.114 7.1613 7
 -1 -8 -1 308.082 6.61956 14
 -1 -8 -1 313.669 6.07435 6
 -1 -8 -1 308.03 7.68167 2
 -1 -8 -1 306.978 6.95048 4
 -1 -8 -1 302.377 6.89675 9
 1 8 1 300.921 7.11809 7
 1 8 1 303.365 7.061 24
 1 8 1 291.884 7.19561 30
 1 8 1 293.095 6.29682 20
 1 8 1 301.683 6.32485 12
 1 8 1 302.226 7.69208 2
 1 8 1 309.07 7.15268 7
 1 8 1 307.199 6.93225 4
 -2 -8 -1 97.2214 3.15249 31
 -2 -8 -1 97.2916 2.84752 2
 -2 -8 -1 98.0131 2.53123 10
 -2 -8 -1 100.28 2.57982 4
 -2 -8 -1 100.82 2.72162 13
 -2 -8 -1 96.1533 2.72827 9
 -2 -8 -1 95.3139 2.81073 7
 -2 -8 -1 102.072 2.63473 14
 -2 -8 -1 96.8624 2.88253 7
 2 8 1 100.279 3.09489 30
 2 8 1 93.7427 2.79904 7
 2 8 1 99.4959 2.22182 17
 2 8 1 103.954 2.92966 24
 2 8 1 97.6916 2.90751 11
 2 8 1 99.7716 3.15301 32
 2 8 1 95.8286 2.81345 7
 2 8 1 96.1274 2.87937 2
 2 8 1 101.076 2.48433 12
 2 8 1 97.8598 2.5477 4
 -3 -8 -1 -0.399 0.47214 9
 -3 -8 -1 0.70328 0.56824 13
 -3 -8 -1 0.93852 0.51625 10
 -3 -8 -1 0.81343 0.42732 2
 -3 -8 -1 0.94053 0.85252 31
 -3 -8 -1 1.03054 0.6311 7
 -3 -8 -1 0.30418 0.43431 4
 -3 -8 -1 0.7618 0.54849 7
 3 8 1 0.64683 0.69552 24
 3 8 1 0.41419 0.39863 4
 3 8 1 -0.2142 0.50634 11
 3 8 1 0.70978 0.54315 26
 3 8 1 0.70258 0.56136 12
 3 8 1 0.55915 0.46858 2
 3 8 1 0.86438 0.94763 32
 3 8 1 0.54531 0.53289 7
 3 8 1 1.71159 0.84815 30
 3 8 1 0.44283 0.49327 17
 3 8 1 0.80415 0.57574 7
 -4 -8 -1 0.35138 0.47557 4
 -4 -8 -1 -0.0394 0.53766 7
 -4 -8 -1 -0.2326 0.45264 2
 -4 -8 -1 0.54 0.6265 7
 -4 -8 -1 0.22768 0.56774 20
 -4 -8 -1 0.36457 0.48642 9
 -4 -8 -1 0.61613 0.95024 31
 -4 -8 -1 1.40267 0.64036 13
 4 8 1 0.55372 0.54832 15
 4 8 1 0.26245 0.59561 12
 4 8 1 0.61796 0.58426 11
 4 8 1 1.03255 1.03492 32
 4 8 1 -0.2997 0.56703 7
 4 8 1 0.84154 0.85525 24
 4 8 1 0.31626 0.52395 2
 4 8 1 0.60344 0.61985 7
 4 8 1 -0.262 0.95351 30
 -5 -8 -1 3.56493 0.7473 20
 -5 -8 -1 3.21018 0.67802 13
 -5 -8 -1 4.03158 0.82046 7
 -5 -8 -1 3.81406 0.82218 7
 -5 -8 -1 2.51905 1.11311 24
 -5 -8 -1 3.39397 0.87742 27
 -5 -8 -1 2.19392 0.57147 2
 -5 -8 -1 3.48256 1.14485 31
 -5 -8 -1 2.27251 0.68993 9
 -5 -8 -1 3.25561 0.61212 4
 5 8 1 2.09765 1.07114 32
 5 8 1 3.47485 0.82199 7
 5 8 1 2.24029 0.67526 11
 5 8 1 2.35674 0.69082 2
 5 8 1 2.94094 0.62456 15
 5 8 1 2.89566 1.14782 30
 5 8 1 1.6255 0.74418 12
 5 8 1 4.43142 0.9991 24
 5 8 1 2.97573 0.79481 7
 -6 -8 -1 3.30143 0.9339 20
 -6 -8 -1 4.18269 1.0494 7
 -6 -8 -1 2.03018 0.84211 9
 -6 -8 -1 2.22787 0.61845 18
 -6 -8 -1 1.87469 1.35599 24
 -6 -8 -1 2.16648 1.13255 31
 -6 -8 -1 2.08465 0.73044 4
 -6 -8 -1 1.81967 0.94204 27
 -6 -8 -1 2.16674 0.82864 13
 -6 -8 -1 4.46609 0.89915 7
 6 8 1 4.10655 0.91881 12
 6 8 1 2.0816 1.15161 30
 6 8 1 2.32903 0.90842 11
 6 8 1 1.48314 1.26296 32
 6 8 1 2.6535 0.64527 5
 6 8 1 3.06912 0.92977 7
 6 8 1 4.28072 1.00604 7
 6 8 1 2.62016 0.82486 2
 6 8 1 2.39589 1.16146 24
 -7 -8 -1 0.9854 1.52372 24
 -7 -8 -1 -0.6749 1.01746 7
 -7 -8 -1 -0.6667 1.17985 31
 -7 -8 -1 1.09509 0.93044 3
 -7 -8 -1 -0.4366 1.10402 20
 -7 -8 -1 0.01535 0.77743 4
 -7 -8 -1 0.13229 0.83567 13
 -7 -8 -1 -0.0222 1.23574 7
 -7 -8 -1 -1.3731 1.02334 9
 7 8 1 -0.0365 0.68728 5
 7 8 1 0.45902 0.93394 2
 7 8 1 0.36044 1.24327 30
 7 8 1 1.68163 1.57839 32
 7 8 1 1.86098 1.05975 7
 7 8 1 1.55682 1.05901 12
 7 8 1 -2.5858 1.17838 7
 7 8 1 -1.8005 1.3835 24
 7 8 1 -0.1801 1.06845 11
 8 -9 -1 6.94177 0.97929 8
 8 -9 -1 5.4554 1.4316 32
 8 -9 -1 6.75288 0.99011 7
 8 -9 -1 8.12996 1.04109 13
 8 -9 -1 8.08231 1.4746 33
 8 -9 -1 8.43882 1.51283 7
 8 -9 -1 5.14775 0.88761 12
 8 -9 -1 6.80674 1.0595 2
 -8 9 1 6.91848 1.17745 7
 -8 9 1 9.13312 1.18263 10
 -8 9 1 7.00773 1.05977 5
 -8 9 1 8.16642 1.2622 11
 -8 9 1 5.89209 0.81242 4
 -8 9 1 6.81989 0.88827 3
 -8 9 1 7.41434 1.23846 7
 7 -9 -1 -0.8003 0.71478 13
 7 -9 -1 0.89273 0.68676 7
 7 -9 -1 0.22043 0.66338 2
 7 -9 -1 0.72516 1.07711 33
 7 -9 -1 -0.3717 0.99966 7
 7 -9 -1 1.66483 0.72294 12
 7 -9 -1 0.40609 0.99114 32
 7 -9 -1 0.30587 0.90186 19
 7 -9 -1 -1.0133 0.60952 8
 -7 9 1 -0.1193 0.73964 10
 -7 9 1 -0.7222 0.56901 3
 -7 9 1 -0.0822 0.72322 8
 -7 9 1 0.33171 0.76039 7
 -7 9 1 0.80426 0.55405 4
 -7 9 1 0.73949 0.70291 5
 -7 9 1 -0.3646 0.86479 11
 -7 9 1 0.45609 0.77504 7
 6 -9 -1 39.4044 1.72539 33
 6 -9 -1 39.2516 1.90575 19
 6 -9 -1 38.3889 2.04325 7
 6 -9 -1 39.0823 1.65334 12
 6 -9 -1 41.9923 1.79877 7
 6 -9 -1 35.8709 1.56267 13
 6 -9 -1 37.4225 1.78931 2
 6 -9 -1 36.5864 2.23822 32
 6 -9 -1 41.416 1.59347 3
 6 -9 -1 40.0452 1.63602 8
 -6 9 1 34.4701 1.93709 7
 -6 9 1 36.4177 1.70178 8
 -6 9 1 39.3236 1.64344 5
 -6 9 1 40.7273 1.81881 10
 -6 9 1 38.5108 1.6087 4
 -6 9 1 41.3755 1.52266 3
 -6 9 1 36.8117 1.8192 7
 5 -9 -1 32.5047 2.01969 32
 5 -9 -1 34.7687 2.03799 31
 5 -9 -1 33.4393 1.47347 12
 5 -9 -1 34.6492 1.37259 3
 5 -9 -1 33.3265 1.44948 33
 5 -9 -1 33.8082 1.38762 13
 5 -9 -1 35.4186 1.56438 2
 5 -9 -1 36.1149 1.82907 7
 5 -9 -1 32.5179 1.57827 7
 5 -9 -1 31.5264 1.40253 8
 5 -9 -1 35.9746 1.80367 19
 -5 9 1 33.0748 1.27888 3
 -5 9 1 33.0857 1.69986 7
 -5 9 1 33.9961 1.09883 16
 -5 9 1 34.0255 1.58062 10
 -5 9 1 35.4991 1.41792 4
 -5 9 1 34.2851 1.59402 7
 -5 9 1 33.9467 1.45007 5
 -5 9 1 33.7333 1.52687 8
 4 -9 -1 27.0077 1.54925 7
 4 -9 -1 27.9723 1.20115 8
 4 -9 -1 25.5677 1.27991 12
 4 -9 -1 26.9649 1.10933 3
 4 -9 -1 28.167 1.40012 7
 4 -9 -1 26.2884 1.80407 31
 4 -9 -1 27.4745 1.28985 33
 4 -9 -1 26.0956 1.32184 2
 4 -9 -1 24.8336 1.85627 32
 -4 9 1 25.4602 1.47509 7
 -4 9 1 26.615 1.39475 7
 -4 9 1 25.6393 1.33352 10
 -4 9 1 26.5736 1.2907 8
 -4 9 1 25.9464 1.78885 30
 -4 9 1 26.3664 0.97513 25
 -4 9 1 24.1835 1.19195 4
 -4 9 1 26.4634 1.21326 5
 -4 9 1 25.5765 1.1844 14
 3 -9 -1 6.49038 0.70829 3
 3 -9 -1 7.44745 1.09336 32
 3 -9 -1 6.54123 0.69837 7
 3 -9 -1 6.56238 0.62952 8
 3 -9 -1 8.27512 0.87703 7
 3 -9 -1 10.1535 0.88285 2
 3 -9 -1 6.97754 0.69504 12
 3 -9 -1 8.18807 1.15382 31
 3 -9 -1 7.11752 0.73613 10
 3 -9 -1 8.5657 0.90718 28
 -3 9 1 6.05839 0.6542 4
 -3 9 1 6.81626 0.75422 7
 -3 9 1 7.92401 0.80133 12
 -3 9 1 6.64241 0.66993 8
 -3 9 1 7.2853 0.707 10
 -3 9 1 7.58471 0.83919 5
 -3 9 1 6.51839 1.07578 30
 -3 9 1 8.15239 0.76385 7
 -3 9 1 8.85828 0.79279 14
 2 -9 -1 27.8105 1.01753 3
 2 -9 -1 28.7358 1.33449 7
 2 -9 -1 26.164 1.83468 31
 2 -9 -1 28.2893 1.44097 7
 2 -9 -1 25.0884 1.30035 10
 2 -9 -1 27.2379 1.27257 2
 2 -9 -1 28.3641 1.65305 28
 2 -9 -1 27.3277 1.22479 12
 -2 9 1 28.533 1.19784 8
 -2 9 1 27.1113 1.2903 12
 -2 9 1 28.8839 1.35047 7
 -2 9 1 24.5657 1.70885 30
 -2 9 1 28.0108 0.85945 22
 -2 9 1 26.5144 1.22285 10
 -2 9 1 26.0605 1.02246 14
 -2 9 1 28.2593 1.42683 7
 -2 9 1 26.8372 1.20922 4
 1 -9 -1 78.7939 2.25792 10
 1 -9 -1 75.2709 2.827 31
 1 -9 -1 82.7488 2.20653 12
 1 -9 -1 84.864 2.45837 7
 1 -9 -1 79.6725 2.1025 3
 1 -9 -1 83.0266 2.52477 7
 1 -9 -1 84.8305 2.50617 2
 1 -9 -1 84.3496 1.90466 6
 1 -9 -1 84.643 2.38366 9
 -1 9 1 81.4409 2.20535 10
 -1 9 1 76.5681 2.13475 8
 -1 9 1 81.9745 2.25001 12
 -1 9 1 80.1322 2.62951 24
 -1 9 1 78.6928 2.26619 4
 -1 9 1 75.7221 2.7396 30
 -1 9 1 71.7369 2.42541 7
 -1 9 1 83.005 2.45585 7
 0 -9 -1 1226.73 29.5932 2
 0 -9 -1 1229.61 24.1718 6
 0 -9 -1 1224.25 26.0162 9
 0 -9 -1 1239.61 27.1335 7
 0 -9 -1 1254.41 25.41 14
 0 -9 -1 1203.75 26.0487 10
 0 -9 -1 1249.12 27.165 7
 0 -9 -1 1241.24 24.0648 12
 0 -9 -1 1207.23 26.8206 31
 0 9 1 1226.19 26.2692 24
 0 9 1 1190.47 26.4242 30
 0 9 1 1230.18 29.6032 2
 0 9 1 1208.49 24.0564 12
 0 9 1 1215.92 24.2084 8
 0 9 1 1233.86 27.1146 7
 0 9 1 1229.71 27.0817 7
 0 9 1 1186.4 24.5708 20
 0 9 1 1245.69 26.8778 4
 -1 -9 -1 295.061 7.10216 7
 -1 -9 -1 292.905 6.60677 10
 -1 -9 -1 298.316 6.83843 4
 -1 -9 -1 283.012 7.26597 31
 -1 -9 -1 295.668 7.06533 7
 -1 -9 -1 297.95 5.9017 6
 -1 -9 -1 299.793 6.48234 14
 -1 -9 -1 295.6 6.81603 9
 -1 -9 -1 292.247 7.5394 2
 1 9 1 299.102 7.00328 24
 1 9 1 292.073 6.23313 8
 1 9 1 297.29 7.07069 7
 1 9 1 297.047 7.56555 2
 1 9 1 277.928 6.13902 20
 1 9 1 293.292 6.24216 12
 1 9 1 281.869 7.13625 30
 1 9 1 304.797 6.82073 4
 1 9 1 299.808 7.04929 7
 -2 -9 -1 1.4344 0.48419 4
 -2 -9 -1 1.02005 0.63353 14
 -2 -9 -1 -0.7545 0.53035 7
 -2 -9 -1 0.7675 0.50952 10
 -2 -9 -1 0.96445 0.9259 31
 -2 -9 -1 1.31947 0.42642 2
 -2 -9 -1 -0.4584 0.59019 13
 -2 -9 -1 0.44433 0.68755 7
 -2 -9 -1 0.1097 0.50482 9
 2 9 1 0.28929 0.6827 24
 2 9 1 1.31532 0.47479 4
 2 9 1 1.28452 0.57608 12
 2 9 1 0.42326 0.45693 2
 2 9 1 1.71397 0.63948 11
 2 9 1 0.55894 0.81965 30
 2 9 1 0.43129 0.5936 7
 2 9 1 0.34992 0.58469 7
 2 9 1 1.08766 1.00826 32
 -3 -9 -1 0.23181 0.48568 4
 -3 -9 -1 1.2118 0.65646 13
 -3 -9 -1 -0.2662 0.39767 2
 -3 -9 -1 0.421 0.68922 7
 -3 -9 -1 0.08325 0.53514 7
 -3 -9 -1 0.65043 0.54561 9
 -3 -9 -1 0.93287 0.58704 10
 -3 -9 -1 0.44742 0.90965 31
 3 9 1 0.57387 0.98832 30
 3 9 1 0.40185 0.57085 11
 3 9 1 0.57685 0.97644 32
 3 9 1 0.82655 0.74559 24
 3 9 1 0.3707 0.65647 26
 3 9 1 0.49642 0.64325 7
 3 9 1 0.34076 0.45521 4
 3 9 1 0.13917 0.62681 12
 3 9 1 0.3263 0.54049 2
 3 9 1 0.84039 0.67727 7
 3 9 1 0.18739 0.51334 17
 -4 -9 -1 2.47099 0.81391 7
 -4 -9 -1 2.79394 1.10734 31
 -4 -9 -1 2.83167 0.60905 4
 -4 -9 -1 2.67818 0.58378 2
 -4 -9 -1 2.56025 0.71352 7
 -4 -9 -1 3.10613 0.63331 9
 -4 -9 -1 3.34611 0.72946 10
 -4 -9 -1 3.38942 0.80247 13
 4 9 1 3.58872 0.85146 7
 4 9 1 2.45575 0.76402 7
 4 9 1 1.30938 1.08683 30
 4 9 1 4.00594 0.74828 17
 4 9 1 2.29106 0.69499 15
 4 9 1 3.07063 0.77082 12
 4 9 1 2.90751 0.73619 11
 4 9 1 2.79315 1.12111 32
 4 9 1 3.85267 0.96477 24
 4 9 1 2.88973 0.70215 2
 -5 -9 -1 -0.3631 1.13735 31
 -5 -9 -1 0.1068 0.59309 2
 -5 -9 -1 -0.4681 0.68194 7
 -5 -9 -1 -0.446 0.87123 7
 -5 -9 -1 0.42519 0.68723 13
 -5 -9 -1 -0.6348 0.66045 9
 -5 -9 -1 0.57181 0.90165 27
 -5 -9 -1 0.03302 0.64014 4
 5 9 1 -0.6362 0.768 7
 5 9 1 -0.7503 0.88475 17
 5 9 1 0.47321 0.65518 15
 5 9 1 -0.0967 1.17898 30
 5 9 1 1.17798 1.03762 24
 5 9 1 1.45925 1.15143 32
 5 9 1 0.93687 0.76416 12
 5 9 1 0.58189 0.67615 2
 5 9 1 -0.742 0.58793 11
 5 9 1 0.20416 0.83855 7
 -6 -9 -1 9.09273 1.11917 13
 -6 -9 -1 9.65808 1.14051 20
 -6 -9 -1 11.1857 1.28234 27
 -6 -9 -1 8.67159 1.14274 9
 -6 -9 -1 10.4946 0.97129 4
 -6 -9 -1 11.0872 0.92812 18
 -6 -9 -1 10.3484 1.22409 7
 -6 -9 -1 10.9353 1.68608 31
 -6 -9 -1 8.70169 1.24233 7
 6 9 1 8.99506 1.68017 32
 6 9 1 9.68295 1.12797 11
 6 9 1 11.1228 1.21557 12
 6 9 1 10.3087 1.59409 24
 6 9 1 8.55903 0.9209 5
 6 9 1 12.3294 1.33127 7
 6 9 1 7.76179 1.07215 2
 6 9 1 9.66257 1.6226 30
 6 9 1 9.52808 1.32482 7
 8 -10 -1 5.43268 1.06951 13
 8 -10 -1 6.58309 1.3272 19
 8 -10 -1 3.71652 1.4402 33
 8 -10 -1 5.4255 1.0321 7
 8 -10 -1 4.60735 1.05684 8
 8 -10 -1 4.61067 1.49008 32
 8 -10 -1 5.80601 1.53761 7
 8 -10 -1 2.17818 1.1116 2
 -8 10 1 2.90663 1.1254 10
 -8 10 1 5.00313 1.06164 5
 -8 10 1 4.81675 1.02307 3
 -8 10 1 5.78844 1.32866 7
 -8 10 1 6.33978 1.29428 7
 -8 10 1 3.40959 1.30111 11
 7 -10 -1 -0.715 1.10508 33
 7 -10 -1 2.00551 0.68069 12
 7 -10 -1 0.27015 1.09225 7
 7 -10 -1 -0.1387 0.825 2
 7 -10 -1 0.52169 0.78785 8
 7 -10 -1 -0.4221 0.79903 13
 7 -10 -1 1.66696 0.84007 7
 7 -10 -1 -0.3716 0.99974 19
 7 -10 -1 -0.5713 1.13795 32
 7 -10 -1 1.29162 0.69483 3
 -7 10 1 0.65031 0.94357 7
 -7 10 1 1.69474 0.71983 3
 -7 10 1 -1.3497 0.92009 11
 -7 10 1 0.59937 0.83678 8
 -7 10 1 -0.2513 0.75429 5
 -7 10 1 0.9918 1.03053 7
 -7 10 1 -0.118 0.58987 4
 -7 10 1 0.78051 0.89891 10
 6 -10 -1 68.8876 2.18765 13
 6 -10 -1 68.6553 2.24737 8
 6 -10 -1 64.467 2.97476 32
 6 -10 -1 70.7671 2.75293 7
 6 -10 -1 68.4023 2.57241 19
 6 -10 -1 66.6333 2.51003 2
 6 -10 -1 72.7976 2.53018 7
 6 -10 -1 66.4206 2.18393 33
 6 -10 -1 66.6741 2.26462 12
 6 -10 -1 68.2922 2.2015 3
 -6 10 1 66.5431 2.28028 5
 -6 10 1 67.7966 2.14052 3
 -6 10 1 70.1622 2.5315 7
 -6 10 1 66.8281 2.51152 10
 -6 10 1 64.2019 2.23224 4
 -6 10 1 69.9243 2.61015 7
 -6 10 1 65.6119 2.31077 8
 5 -10 -1 49.8184 2.05295 2
 5 -10 -1 52.9685 2.28214 19
 5 -10 -1 49.8004 1.88938 12
 5 -10 -1 51.9407 2.56412 32
 5 -10 -1 51.8475 1.75571 3
 5 -10 -1 52.6804 1.79794 33
 5 -10 -1 54.5696 2.32184 7
 5 -10 -1 52.0162 1.81059 13
 5 -10 -1 49.5218 2.54647 31
 5 -10 -1 53.6123 1.85053 8
 5 -10 -1 54.8139 2.06031 7
 -5 10 1 51.9174 2.21351 7
 -5 10 1 54.3074 1.96857 8
 -5 10 1 52.7347 2.06544 7
 -5 10 1 53.05 2.05035 10
 -5 10 1 50.6902 1.59729 25
 -5 10 1 51.7397 1.85647 4
 -5 10 1 50.0234 1.55741 16
 -5 10 1 53.1397 1.92432 5
 4 -10 -1 14.4504 1.47171 7
 4 -10 -1 16.8596 1.28052 7
 4 -10 -1 15.6225 1.71775 31
 4 -10 -1 12.8807 1.39441 32
 4 -10 -1 14.5799 1.0924 8
 4 -10 -1 15.7929 0.98255 3
 4 -10 -1 18.105 1.18109 2
 4 -10 -1 15.8237 1.4904 28
 4 -10 -1 12.0525 1.07777 12
 -4 10 1 13.3006 1.25677 10
 -4 10 1 15.8165 1.10216 5
 -4 10 1 13.6762 1.28533 7
 -4 10 1 13.5074 1.38135 30
 -4 10 1 15.3258 1.02396 4
 -4 10 1 14.2994 1.19609 8
 -4 10 1 14.6847 1.06037 14
 -4 10 1 17.321 1.45245 7
 3 -10 -1 1.19996 0.82445 28
 3 -10 -1 1.50179 0.5578 12
 3 -10 -1 1.66354 1.02643 32
 3 -10 -1 1.19814 0.4515 3
 3 -10 -1 0.93423 0.44999 2
 3 -10 -1 0.25203 0.62169 7
 3 -10 -1 0.6818 0.50366 8
 3 -10 -1 0.29576 0.52648 7
 3 -10 -1 -0.0502 0.86952 31
 3 -10 -1 1.34414 0.63916 10
 -3 10 1 1.32394 0.59202 10
 -3 10 1 0.56762 0.54437 7
 -3 10 1 1.09263 0.68281 7
 -3 10 1 1.47537 0.51171 5
 -3 10 1 0.87993 0.92902 30
 -3 10 1 0.67303 0.56007 8
 -3 10 1 1.2063 0.48347 14
 -3 10 1 2.01772 0.59776 12
 -3 10 1 0.77227 0.4458 4
 2 -10 -1 50.1697 1.88759 7
 2 -10 -1 47.9787 2.37826 31
 2 -10 -1 49.2984 1.51707 3
 2 -10 -1 50.9507 1.70126 12
 2 -10 -1 50.3517 1.45985 6
 2 -10 -1 50.1452 1.81527 10
 2 -10 -1 49.8528 2.00417 7
 2 -10 -1 51.5035 1.85719 2
 2 -10 -1 50.7404 2.22257 28
 -2 10 1 48.1714 1.77536 12
 -2 10 1 49.9932 2.1948 24
 -2 10 1 50.8899 1.72027 4
 -2 10 1 50.4159 1.31934 22
 -2 10 1 50.0436 1.96547 7
 -2 10 1 50.567 1.71654 10
 -2 10 1 46.5682 2.26043 30
 -2 10 1 49.5058 1.87671 7
 -2 10 1 49.1965 1.66143 8
 1 -10 -1 33.6003 1.43853 2
 1 -10 -1 33.229 1.39136 12
 1 -10 -1 34.1552 1.69915 7
 1 -10 -1 33.0793 1.18138 3
 1 -10 -1 34.491 1.55199 9
 1 -10 -1 32.409 1.06005 6
 1 -10 -1 32.5098 1.50884 7
 1 -10 -1 33.5205 1.43447 10
 1 -10 -1 29.8966 1.98964 31
 -1 10 1 32.3242 1.25456 22
 -1 10 1 33.719 1.35704 10
 -1 10 1 32.3405 1.55869 7
 -1 10 1 33.9267 1.80975 24
 -1 10 1 33.8961 1.54667 7
 -1 10 1 32.7092 1.33745 4
 -1 10 1 32.4687 1.35457 8
 -1 10 1 32.168 1.93414 30
 -1 10 1 33.0448 1.47077 12
 0 -10 -1 158.633 3.81647 10
 0 -10 -1 159.344 4.1216 7
 0 -10 -1 157.051 3.67329 12
 0 -10 -1 149.473 4.49128 31
 0 -10 -1 157.944 3.279 6
 0 -10 -1 154.61 4.29701 2
 0 -10 -1 154.764 3.98936 9
 0 -10 -1 157.747 4.20131 7
 0 10 1 155.304 3.60849 8
 0 10 1 147.716 3.50374 20
 0 10 1 145.053 4.36854 30
 0 10 1 159.59 3.90013 4
 0 10 1 153.703 3.68428 12
 0 10 1 155.087 4.19434 24
 0 10 1 159.289 4.10842 7
 0 10 1 156.695 4.13413 7
 -1 -10 -1 101.286 2.70168 10
 -1 -10 -1 105.994 2.66626 14
 -1 -10 -1 100.497 3.00584 7
 -1 -10 -1 104.921 2.81276 4
 -1 -10 -1 102.906 2.95127 9
 -1 -10 -1 104.929 3.0883 2
 -1 -10 -1 97.4707 3.40803 31
 -1 -10 -1 91.2786 3.08664 7
 1 10 1 110.423 3.06458 7
 1 10 1 98.3412 2.70889 12
 1 10 1 104.823 2.77238 4
 1 10 1 98.1544 2.42579 20
 1 10 1 103.76 3.14126 2
 1 10 1 105.952 3.20184 24
 1 10 1 102.855 3.0203 7
 1 10 1 104.585 2.6581 8
 1 10 1 97.7684 3.34442 30
 -2 -10 -1 11.6836 1.23158 7
 -2 -10 -1 13.9435 1.08452 4
 -2 -10 -1 11.5468 1.03976 13
 -2 -10 -1 14.0081 1.23299 9
 -2 -10 -1 11.0277 1.12221 10
 -2 -10 -1 15.7033 1.11364 2
 -2 -10 -1 13.7137 1.4652 31
 -2 -10 -1 14.8673 1.51308 7
 -2 -10 -1 15.1493 1.29712 14
 2 10 1 15.8183 1.66584 30
 2 10 1 12.0351 1.48532 32
 2 10 1 15.0606 1.35427 7
 2 10 1 16.6528 1.30763 11
 2 10 1 14.6745 1.61345 24
 2 10 1 13.8885 1.21423 2
 2 10 1 13.4764 1.05081 4
 2 10 1 13.9203 1.3164 12
 2 10 1 13.8944 1.34384 7
 -3 -10 -1 14.4655 1.25482 9
 -3 -10 -1 13.0754 1.25409 10
 -3 -10 -1 14.3142 1.52098 14
 -3 -10 -1 14.5075 1.15556 4
 -3 -10 -1 17.5463 1.51772 13
 -3 -10 -1 12.2869 1.18436 7
 -3 -10 -1 13.8467 1.14543 2
 -3 -10 -1 13.1504 1.35041 7
 -3 -10 -1 15.1102 1.61653 31
 3 10 1 11.291 1.41112 30
 3 10 1 12.7324 1.33173 24
 3 10 1 15.732 1.48849 7
 3 10 1 12.8814 1.27353 2
 3 10 1 13.1419 1.08521 4
 3 10 1 15.7174 1.51211 7
 3 10 1 13.4323 1.24053 26
 3 10 1 13.6852 0.98819 17
 3 10 1 14.6114 1.6482 32
 3 10 1 13.7157 1.35411 11
 3 10 1 13.7244 1.41301 12
 -4 -10 -1 6.91255 0.99606 13
 -4 -10 -1 6.25397 0.89592 10
 -4 -10 -1 5.68673 0.94159 7
 -4 -10 -1 5.42841 0.76239 9
 -4 -10 -1 5.52737 0.7646 4
 -4 -10 -1 4.90136 0.79202 2
 -4 -10 -1 4.32329 1.29222 31
 4 10 1 5.14796 0.80255 2
 4 10 1 8.04071 1.10504 7
 4 10 1 6.2987 0.84763 11
 4 10 1 6.40689 0.99114 12
 4 10 1 5.66769 0.88679 15
 4 10 1 6.28156 1.2281 24
 4 10 1 6.93369 0.85408 17
 4 10 1 6.1573 1.35408 30
 4 10 1 6.5407 1.32402 32
 4 10 1 6.57195 1.03415 7
 -5 -10 -1 10.309 1.07749 2
 -5 -10 -1 6.43853 0.96685 13
 -5 -10 -1 9.69897 1.16212 7
 -5 -10 -1 8.50405 1.58432 31
 -5 -10 -1 8.47251 1.24904 27
 -5 -10 -1 8.97501 0.96159 4
 -5 -10 -1 11.3793 1.32555 7
 -5 -10 -1 10.742 1.13332 10
 -5 -10 -1 8.72557 1.09105 9
 5 10 1 8.9356 1.59439 32
 5 10 1 8.2803 1.47031 24
 5 10 1 10.0809 1.0836 11
 5 10 1 9.88483 1.27368 7
 5 10 1 9.68609 0.93967 15
 5 10 1 9.71863 1.25239 7
 5 10 1 11.1466 1.16653 17
 5 10 1 8.7966 1.57194 30
 5 10 1 10.9732 1.23504 12
 5 10 1 7.70087 1.04049 2
 -6 -10 -1 6.55704 1.6118 31
 -6 -10 -1 9.15232 1.64927 7
 -6 -10 -1 7.4079 1.05619 4
 -6 -10 -1 8.48732 1.45078 27
 -6 -10 -1 6.92772 1.20663 9
 -6 -10 -1 7.60658 1.36974 7
 6 10 1 7.75935 1.49337 7
 6 10 1 8.23452 1.66159 30
 6 10 1 8.4639 1.34352 12
 6 10 1 6.47006 1.74212 24
 6 10 1 6.73737 1.41948 7
 6 10 1 7.87043 1.78799 32
 6 10 1 4.10635 1.10138 2
 6 10 1 8.83748 1.45683 17
 7 -11 -1 11.4469 1.47078 19
 7 -11 -1 13.084 1.23648 8
 7 -11 -1 9.29997 1.10679 13
 7 -11 -1 9.27452 1.00985 3
 7 -11 -1 10.8183 1.29846 2
 7 -11 -1 12.677 1.79553 32
 7 -11 -1 8.87286 1.17427 7
 7 -11 -1 11.7393 1.60651 7
 7 -11 -1 10.2173 0.97183 12
 -7 11 1 10.3715 1.00566 4
 -7 11 1 11.6127 1.20631 5
 -7 11 1 14.0254 1.33041 25
 -7 11 1 10.2892 1.25951 8
 -7 11 1 13.7762 1.55948 7
 -7 11 1 10.4208 1.33539 11
 -7 11 1 9.37037 1.28255 10
 -7 11 1 10.6493 1.0391 3
 -7 11 1 12.1562 1.38954 7
 6 -11 -1 47.8835 1.88475 3
 6 -11 -1 43.1545 2.72841 32
 6 -11 -1 47.802 2.02067 8
 6 -11 -1 43.4343 1.95419 12
 6 -11 -1 46.5271 1.97112 13
 6 -11 -1 44.3056 2.44552 19
 6 -11 -1 48.419 2.17699 7
 6 -11 -1 44.8644 2.61966 7
 6 -11 -1 45.9485 2.15272 2
 -6 11 1 45.7814 2.29557 7
 -6 11 1 42.9005 1.79511 25
 -6 11 1 43.9068 2.1219 8
 -6 11 1 46.4108 1.38542 16
 -6 11 1 43.1594 1.81391 4
 -6 11 1 43.8474 1.99326 5
 -6 11 1 49.334 2.39797 7
 -6 11 1 46.8504 2.27429 10
 5 -11 -1 64.6577 2.17756 12
 5 -11 -1 60.9089 2.68467 7
 5 -11 -1 68.2353 2.43407 2
 5 -11 -1 61.1608 2.95941 32
 5 -11 -1 63.259 2.14705 8
 5 -11 -1 64.1409 2.06751 3
 5 -11 -1 61.2714 2.91697 31
 5 -11 -1 67.2674 2.44221 7
 5 -11 -1 63.2535 2.16468 13
 -5 11 1 63.594 2.19172 4
 -5 11 1 63.4393 2.26817 8
 -5 11 1 62.2582 2.23792 5
 -5 11 1 65.3877 2.4799 7
 -5 11 1 61.7905 2.06815 14
 -5 11 1 61.9132 2.38737 10
 -5 11 1 65.0632 2.62614 7
 -5 11 1 65.5126 1.92197 16
 4 -11 -1 8.00575 0.82047 12
 4 -11 -1 10.0993 0.98962 3
 4 -11 -1 9.97932 1.2266 7
 4 -11 -1 9.73902 1.1693 28
 4 -11 -1 10.1029 0.89682 8
 4 -11 -1 9.25209 1.44684 32
 4 -11 -1 10.9437 1.07214 2
 4 -11 -1 12.7475 1.56517 31
 4 -11 -1 10.2517 1.05048 7
 -4 11 1 10.5876 1.05947 4
 -4 11 1 11.0549 1.12814 7
 -4 11 1 11.9215 1.40329 7
 -4 11 1 9.20509 1.04168 14
 -4 11 1 10.9243 1.16943 5
 -4 11 1 9.36901 0.90798 10
 -4 11 1 8.65161 1.35194 30
 -4 11 1 8.46191 0.89309 8
 3 -11 -1 4.49871 0.8577 7
 3 -11 -1 3.00656 1.0802 31
 3 -11 -1 4.28065 0.79141 10
 3 -11 -1 4.1928 0.60549 2
 3 -11 -1 4.75156 1.0588 28
 3 -11 -1 4.03008 0.70811 7
 3 -11 -1 4.47967 0.68768 12
 3 -11 -1 4.73754 0.59689 3
 -3 11 1 5.17804 0.85311 7
 -3 11 1 4.59021 0.77672 8
 -3 11 1 5.52412 0.68345 4
 -3 11 1 4.40177 0.7088 5
 -3 11 1 4.8761 0.83972 7
 -3 11 1 4.37394 0.77473 12
 -3 11 1 4.90028 1.14795 30
 -3 11 1 4.44649 0.73823 10
 2 -11 -1 1.22184 0.61491 7
 2 -11 -1 2.77116 0.57576 6
 2 -11 -1 1.86764 0.67274 9
 2 -11 -1 2.94563 0.87812 7
 2 -11 -1 2.756 1.07362 28
 2 -11 -1 1.92874 0.60336 12
 2 -11 -1 2.04176 0.48356 3
 2 -11 -1 1.99311 1.03304 31
 2 -11 -1 3.01678 0.59152 2
 2 -11 -1 1.5753 0.68239 10
 -2 11 1 1.53249 0.63878 7
 -2 11 1 1.90641 0.45957 22
 -2 11 1 2.53828 0.65659 10
 -2 11 1 1.38529 0.62638 8
 -2 11 1 2.24396 0.58915 4
 -2 11 1 2.29461 0.72775 12
 -2 11 1 1.48015 0.99712 30
 -2 11 1 0.781 0.87463 24
 1 -11 -1 50.4995 1.93381 9
 1 -11 -1 47.9707 1.79432 10
 1 -11 -1 45.3648 1.77404 12
 1 -11 -1 48.9037 1.37683 6
 1 -11 -1 49.1552 1.91437 7
 1 -11 -1 48.9263 1.55235 3
 1 -11 -1 47.6734 1.82445 2
 1 -11 -1 47.0527 2.4978 31
 1 -11 -1 46.9317 2.12927 7
 -1 11 1 49.5665 1.74543 8
 -1 11 1 48.582 1.58808 22
 -1 11 1 46.0953 1.94734 7
 -1 11 1 50.3944 1.99591 7
 -1 11 1 45.9866 2.10708 24
 -1 11 1 47.5949 2.37474 30
 -1 11 1 48.0871 1.72358 4
 -1 11 1 46.4258 1.82743 12
 0 -11 -1 34.2288 1.35541 3
 0 -11 -1 32.9709 2.25094 31
 0 -11 -1 34.4738 1.48837 2
 0 -11 -1 35.1801 1.63592 7
 0 -11 -1 35.6956 1.62354 9
 0 -11 -1 35.2952 1.559 10
 0 -11 -1 34.939 1.92307 7
 0 -11 -1 34.5177 1.07063 6
 0 -11 -1 33.53 1.56063 12
 0 11 1 36.5418 1.73899 7
 0 11 1 34.9334 1.45745 4
 0 11 1 34.91 1.51416 8
 0 11 1 38.6112 1.79161 7
 0 11 1 30.8192 1.8471 24
 0 11 1 32.3271 2.07785 30
 0 11 1 34.3972 1.62168 12
 0 11 1 33.8995 1.35041 20
 -1 -11 -1 3.09871 0.65138 9
 -1 -11 -1 2.75948 0.57662 2
 -1 -11 -1 3.60311 0.70886 10
 -1 -11 -1 3.55264 0.9315 7
 -1 -11 -1 3.51011 0.73096 14
 -1 -11 -1 3.59344 0.77667 7
 -1 -11 -1 1.29703 1.0457 31
 1 11 1 3.3311 1.12286 30
 1 11 1 3.39477 0.7268 8
 1 11 1 2.80364 0.80025 7
 1 11 1 3.83439 0.81805 12
 1 11 1 2.46058 0.86931 24
 1 11 1 2.21991 0.75511 7
 1 11 1 3.84396 0.61221 4
 -2 -11 -1 -0.4233 0.57952 9
 -2 -11 -1 0.89745 0.54272 2
 -2 -11 -1 -0.5846 1.01381 31
 -2 -11 -1 -0.3996 0.68236 7
 -2 -11 -1 0.23633 0.8227 13
 -2 -11 -1 -0.8133 0.73444 14
 -2 -11 -1 -0.7737 0.65647 10
 -2 -11 -1 -0.2746 0.88717 7
 -2 -11 -1 -0.5787 0.58566 4
 2 11 1 -0.4251 0.55298 4
 2 11 1 -1.0637 1.06471 32
 2 11 1 0.66981 0.90675 24
 2 11 1 1.22305 0.72624 7
 2 11 1 -0.5741 0.71514 12
 2 11 1 0.69354 0.67954 2
 2 11 1 0.8206 1.0538 30
 2 11 1 0.42091 0.7422 7
 2 11 1 -0.2545 0.60786 11
 2 11 1 0.72415 0.69768 8
 -3 -11 -1 2.0257 0.78934 7
 -3 -11 -1 4.10045 0.99719 14
 -3 -11 -1 3.78764 0.76122 9
 -3 -11 -1 3.08516 0.72794 2
 -3 -11 -1 3.33981 0.76747 4
 -3 -11 -1 1.24901 1.07919 7
 -3 -11 -1 3.67064 1.37014 31
 -3 -11 -1 4.56687 0.91192 13
 -3 -11 -1 4.38043 0.82658 10
 3 11 1 5.02354 0.93488 12
 3 11 1 2.78903 0.69756 4
 3 11 1 3.04472 0.81915 2
 3 11 1 4.07942 0.7897 11
 3 11 1 3.01881 0.87506 7
 3 11 1 2.54951 1.36554 32
 3 11 1 2.42797 1.12922 30
 3 11 1 4.1634 0.95422 7
 3 11 1 5.4228 1.22971 24
 3 11 1 2.69719 0.93766 26
 -4 -11 -1 0.80759 1.29034 31
 -4 -11 -1 2.13927 0.94532 10
 -4 -11 -1 2.92595 0.82727 2
 -4 -11 -1 2.7782 0.95711 13
 -4 -11 -1 2.04296 0.71685 9
 -4 -11 -1 3.46384 0.83085 4
 -4 -11 -1 2.73594 1.22157 7
 -4 -11 -1 -0.2956 0.91861 7
 -4 -11 -1 3.22191 1.17783 14
 4 11 1 1.67158 0.81916 17
 4 11 1 1.59095 1.05892 7
 4 11 1 2.61255 1.01402 7
 4 11 1 2.04463 1.28207 30
 4 11 1 2.80738 0.85215 2
 4 11 1 2.62591 1.02022 12
 4 11 1 3.80562 1.33322 24
 4 11 1 0.59568 1.22358 32
 4 11 1 2.77728 0.83618 11
 4 11 1 1.50101 0.95073 15
 -5 -11 -1 7.45344 1.03816 4
 -5 -11 -1 8.54428 1.1799 9
 -5 -11 -1 8.0195 1.23589 7
 -5 -11 -1 9.51678 1.7063 7
 -5 -11 -1 6.59602 1.21657 10
 -5 -11 -1 6.74704 1.32469 27
 -5 -11 -1 7.10921 1.6645 31
 -5 -11 -1 6.73294 1.22202 13
 -5 -11 -1 9.68017 1.63026 14
 -5 -11 -1 8.26391 1.15074 2
 5 11 1 6.91064 1.12101 11
 5 11 1 7.22269 1.73959 24
 5 11 1 6.99151 1.71068 30
 5 11 1 9.75007 1.4473 7
 5 11 1 6.1554 1.36476 7
 5 11 1 8.02128 1.01607 15
 5 11 1 5.7641 1.54058 32
 5 11 1 6.59082 1.22398 12
 5 11 1 9.07273 1.20589 2
 5 11 1 7.91936 1.15682 17
 6 -12 -1 29.219 1.73849 3
 6 -12 -1 29.0506 1.97471 13
 6 -12 -1 23.2781 1.73515 12
 6 -12 -1 28.2502 2.53719 31
 6 -12 -1 28.8329 2.66274 7
 6 -12 -1 33.3735 2.01078 2
 6 -12 -1 28.3368 2.68624 32
 6 -12 -1 30.0282 2.60461 19
 6 -12 -1 29.7758 1.94292 8
 6 -12 -1 28.9875 2.01237 7
 -6 12 1 27.9358 2.06108 8
 -6 12 1 28.6142 2.454 7
 -6 12 1 25.3529 2.21267 7
 -6 12 1 27.3522 2.21462 10
 -6 12 1 29.8683 1.39766 16
 -6 12 1 27.4427 1.60028 4
 -6 12 1 32.2489 1.91849 5
 -6 12 1 26.9064 1.8799 14
 5 -12 -1 22.4048 1.68592 12
 5 -12 -1 24.349 1.5726 2
 5 -12 -1 22.6868 2.30468 31
 5 -12 -1 21.5954 1.63868 8
 5 -12 -1 22.8957 2.39976 32
 5 -12 -1 24.1239 1.44001 3
 5 -12 -1 20.7036 1.72256 7
 5 -12 -1 21.9944 1.74155 13
 5 -12 -1 24.7254 2.34765 7
 -5 12 1 26.6211 1.92363 10
 -5 12 1 22.7752 1.49873 14
 -5 12 1 23.2752 1.78366 8
 -5 12 1 24.311 1.53383 16
 -5 12 1 23.7974 1.68746 5
 -5 12 1 24.7316 2.12753 7
 -5 12 1 17.4519 1.88025 7
 -5 12 1 23.1528 1.49901 4
 4 -12 -1 12.1515 1.44721 7
 4 -12 -1 9.58167 1.09822 7
 4 -12 -1 12.1136 1.64076 31
 4 -12 -1 10.7164 1.13998 2
 4 -12 -1 11.9844 1.36627 28
 4 -12 -1 10.0639 0.83983 3
 4 -12 -1 13.6977 1.3899 12
 -4 12 1 9.54851 1.13539 7
 -4 12 1 11.3213 1.35451 5
 -4 12 1 10.1033 1.07072 8
 -4 12 1 9.16209 0.89434 4
 -4 12 1 8.75408 1.4088 30
 -4 12 1 10.1896 0.8075 14
 -4 12 1 10.3549 1.27745 7
 -4 12 1 9.28706 1.06018 10
 3 -12 -1 0.70965 1.09803 28
 3 -12 -1 -0.5968 0.83893 7
 3 -12 -1 0.36854 0.566 3
 3 -12 -1 -1.1956 0.63092 7
 3 -12 -1 -0.4273 0.6324 6
 3 -12 -1 0.17055 0.4828 2
 3 -12 -1 -1.2385 0.99469 31
 3 -12 -1 -0.1578 0.70862 12
 3 -12 -1 0.24903 0.79036 9
 3 -12 -1 -0.1066 0.77071 10
 -3 12 1 -0.0165 0.65361 5
 -3 12 1 -0.4042 0.53674 4
 -3 12 1 -1.0774 0.86442 24
 -3 12 1 0.64657 0.74229 8
 -3 12 1 1.05663 0.73101 10
 -3 12 1 0.76464 0.84763 7
 -3 12 1 0.47059 0.84392 7
 -3 12 1 0.46433 1.12375 30
 -3 12 1 0.19288 0.71194 12
 2 -12 -1 0.69651 0.58294 6
 2 -12 -1 0.85642 0.78055 9
 2 -12 -1 2.16076 1.24167 28
 2 -12 -1 1.46744 1.11483 31
 2 -12 -1 1.39073 0.74228 7
 2 -12 -1 1.54944 0.67566 12
 2 -12 -1 1.65024 0.52753 3
 2 -12 -1 1.19255 0.75577 10
 2 -12 -1 2.12652 1.01986 7
 2 -12 -1 1.7668 0.5083 2
 -2 12 1 0.99058 0.68305 8
 -2 12 1 1.41906 0.61491 4
 -2 12 1 0.45603 0.67735 10
 -2 12 1 1.07241 0.52814 22
 -2 12 1 1.09359 0.77861 12
 -2 12 1 3.04025 0.9494 24
 -2 12 1 1.68633 1.05369 30
 -2 12 1 1.60657 0.74744 7
 -2 12 1 0.96723 0.78204 7
 1 -12 -1 14.9322 1.37803 7
 1 -12 -1 15.8078 1.70459 31
 1 -12 -1 16.6813 1.42434 12
 1 -12 -1 15.4507 1.40987 10
 1 -12 -1 16.426 0.95672 6
 1 -12 -1 15.6473 1.09965 2
 1 -12 -1 15.1084 1.76172 7
 1 -12 -1 16.553 1.43939 9
 1 -12 -1 18.1782 1.13859 3
 -1 12 1 17.4155 1.28039 22
 -1 12 1 16.7391 1.50804 12
 -1 12 1 19.8044 1.59648 7
 -1 12 1 17.6934 1.28983 20
 -1 12 1 14.8718 1.60811 24
 -1 12 1 16.1275 1.50451 7
 -1 12 1 12.7159 1.49493 30
 -1 12 1 14.419 1.34671 8
 -1 12 1 15.0495 1.25987 4
 0 -12 -1 11.5013 0.96703 10
 0 -12 -1 8.29475 1.02278 2
 0 -12 -1 11.4377 1.03486 3
 0 -12 -1 10.1878 1.0163 12
 0 -12 -1 10.3522 1.05119 7
 0 -12 -1 11.4057 1.50267 31
 0 -12 -1 12.4322 1.31656 7
 0 -12 -1 12.6018 1.28152 9
 0 12 1 7.49732 1.06217 24
 0 12 1 10.7616 0.95266 8
 0 12 1 11.1554 1.14561 7
 0 12 1 9.50873 0.86754 4
 0 12 1 9.79634 1.02818 12
 0 12 1 9.05197 1.44615 30
 0 12 1 11.3939 1.10812 20
 0 12 1 10.8633 1.06621 7
 -1 -12 -1 1.33962 0.60077 23
 -1 -12 -1 2.49385 0.70201 7
 -1 -12 -1 0.8518 0.73885 14
 -1 -12 -1 0.93918 0.63056 2
 -1 -12 -1 -0.1473 0.65168 9
 -1 -12 -1 0.94874 0.98215 7
 -1 -12 -1 -0.2948 1.06005 31
 -1 -12 -1 1.77789 0.75602 10
 1 12 1 0.31876 0.81638 7
 1 12 1 1.41789 0.60649 4
 1 12 1 0.54692 0.75777 7
 1 12 1 1.14036 0.72461 8
 1 12 1 1.19608 0.81007 12
 1 12 1 1.36202 1.18025 30
 1 12 1 2.03855 1.04227 24
 -2 -12 -1 1.01349 0.86271 14
 -2 -12 -1 1.1365 0.82325 7
 -2 -12 -1 1.36407 1.01145 13
 -2 -12 -1 0.8272 1.09914 31
 -2 -12 -1 0.72748 1.12119 7
 -2 -12 -1 1.52102 0.67048 9
 -2 -12 -1 1.00158 0.66483 2
 -2 -12 -1 0.78374 0.76597 10
 -2 -12 -1 0.82442 0.71393 4
 2 12 1 0.57532 0.92959 12
 2 12 1 1.50753 0.71983 4
 2 12 1 -0.5988 1.21079 32
 2 12 1 0.99425 0.80377 8
 2 12 1 0.47754 0.69774 11
 2 12 1 2.26839 1.14695 24
 2 12 1 0.75034 0.89295 7
 2 12 1 1.2167 0.83899 7
 2 12 1 1.03893 1.23521 30
 2 12 1 0.72841 0.78868 2
 -3 -12 -1 0.65492 1.2568 31
 -3 -12 -1 -1.2706 1.2228 7
 -3 -12 -1 -0.4264 0.85609 10
 -3 -12 -1 -0.5788 0.86677 7
 -3 -12 -1 -0.1299 0.77573 4
 -3 -12 -1 1.566 1.04898 14
 -3 -12 -1 -0.1935 0.71111 9
 -3 -12 -1 1.3156 1.05451 13
 -3 -12 -1 0.40495 0.78513 2
 3 12 1 1.22256 0.91053 8
 3 12 1 1.47413 1.0385 7
 3 12 1 -0.1533 0.91489 12
 3 12 1 0.91158 0.89232 2
 3 12 1 -0.1676 1.27614 24
 3 12 1 0.34006 0.77792 11
 3 12 1 -0.2847 1.26424 30
 3 12 1 0.86812 1.33342 32
 3 12 1 -0.5225 0.76137 4
 3 12 1 -0.1056 1.08166 26
 3 12 1 0.93389 1.0609 7
 -4 -12 -1 3.81834 1.1834 13
 -4 -12 -1 3.18992 1.59293 7
 -4 -12 -1 2.27723 1.18178 7
 -4 -12 -1 6.02759 1.66167 31
 -4 -12 -1 4.45707 1.05102 2
 -4 -12 -1 5.45027 1.01221 4
 -4 -12 -1 4.61934 1.14392 10
 -4 -12 -1 5.05074 1.39685 14
 4 12 1 5.62415 1.28611 7
 4 12 1 2.62209 1.50397 32
 4 12 1 5.97274 1.45091 7
 4 12 1 6.24819 1.69919 24
 4 12 1 6.72799 1.11158 2
 4 12 1 4.67396 1.22931 15
 4 12 1 6.18764 1.28748 12
 4 12 1 2.43459 1.4254 30
 5 -13 -1 27.5789 2.72993 32
 5 -13 -1 29.9693 2.66357 31
 5 -13 -1 30.416 1.7251 3
 5 -13 -1 31.4961 2.05052 12
 5 -13 -1 26.4561 2.10707 13
 5 -13 -1 29.7806 2.1033 7
 5 -13 -1 30.1479 2.81919 7
 5 -13 -1 29.7606 1.83371 2
 -5 13 1 35.3772 2.54203 7
 -5 13 1 32.0663 1.91013 16
 -5 13 1 22.5498 2.24864 7
 -5 13 1 29.9259 1.75731 4
 -5 13 1 29.1378 1.98836 5
 -5 13 1 29.6457 1.58606 14
 -5 13 1 31.7004 2.15586 8
 -5 13 1 31.0367 2.30419 10
 4 -13 -1 0.68781 1.0646 9
 4 -13 -1 4.27272 1.38302 28
 4 -13 -1 2.36843 0.91572 7
 4 -13 -1 0.37163 1.2425 31
 4 -13 -1 1.82725 0.60918 17
 4 -13 -1 2.64268 0.7545 3
 4 -13 -1 1.96162 0.64987 2
 4 -13 -1 3.53361 0.95191 12
 4 -13 -1 2.35053 1.21355 7
 -4 13 1 2.0457 1.0728 7
 -4 13 1 2.29787 0.97257 8
 -4 13 1 2.04188 1.09577 7
 -4 13 1 2.46957 0.997 10
 -4 13 1 2.92006 1.14502 24
 -4 13 1 2.60495 0.75617 4
 -4 13 1 2.62888 1.36978 30
 -4 13 1 2.73839 0.88116 5
 3 -13 -1 3.26809 1.39825 28
 3 -13 -1 1.76733 1.35929 31
 3 -13 -1 2.73786 0.65966 2
 3 -13 -1 0.99732 0.9625 9
 3 -13 -1 2.20871 0.89718 7
 3 -13 -1 1.89832 1.23497 7
 3 -13 -1 2.89043 0.71909 3
 3 -13 -1 1.41812 0.85648 12
 3 -13 -1 3.28539 0.79901 6
 3 -13 -1 2.15922 0.98683 10
 -3 13 1 2.14289 1.08894 24
 -3 13 1 2.35115 0.95689 12
 -3 13 1 3.14195 0.85593 5
 -3 13 1 3.28883 0.95897 8
 -3 13 1 2.49938 1.31448 30
 -3 13 1 2.9386 0.95049 10
 -3 13 1 3.19469 0.75368 4
 -3 13 1 1.1711 0.95503 7
 2 -13 -1 2.65367 0.93083 9
 2 -13 -1 1.47433 0.67999 6
 2 -13 -1 0.7449 1.18217 31
 2 -13 -1 2.11184 0.89081 10
 2 -13 -1 1.46178 1.2227 7
 2 -13 -1 0.82694 0.85148 12
 2 -13 -1 -0.4702 0.72322 7
 2 -13 -1 0.89389 1.39413 28
 2 -13 -1 1.51225 0.64662 3
 2 -13 -1 1.42511 0.61524 2
 -2 13 1 0.70112 0.83298 8
 -2 13 1 0.81247 0.88824 24
 -2 13 1 2.14904 0.70465 4
 -2 13 1 1.31978 1.18796 30
 -2 13 1 0.09027 0.92759 12
 -2 13 1 -0.0976 0.9154 7
 -2 13 1 2.54481 0.95067 7
 1 -13 -1 5.00767 0.68742 6
 1 -13 -1 3.61413 0.81973 7
 1 -13 -1 3.89197 0.69139 2
 1 -13 -1 4.39408 0.69399 3
 1 -13 -1 5.89033 1.27621 7
 1 -13 -1 6.58274 1.61988 28
 1 -13 -1 5.21044 0.92357 9
 1 -13 -1 5.33475 0.97789 12
 1 -13 -1 3.8202 1.35945 31
 1 -13 -1 4.84964 0.93714 10
 -1 13 1 4.94032 0.8893 20
 -1 13 1 4.194 0.76021 4
 -1 13 1 5.06142 0.98495 7
 -1 13 1 2.10617 0.94523 24
 -1 13 1 3.86531 0.98342 7
 -1 13 1 5.17775 0.91236 8
 -1 13 1 5.27024 0.84848 22
 -1 13 1 5.49473 1.01186 12
 -1 13 1 4.02232 1.30482 30
 0 -13 -1 6.12505 0.95569 10
 0 -13 -1 4.17913 1.35233 31
 0 -13 -1 4.88532 0.99248 12
 0 -13 -1 8.09482 1.07358 7
 0 -13 -1 5.36367 0.93168 9
 0 -13 -1 6.33535 1.28655 7
 0 -13 -1 6.35556 0.7663 3
 0 -13 -1 6.08777 0.82434 2
 0 13 1 6.83703 1.57182 30
 0 13 1 5.49322 0.96264 8
 0 13 1 5.1889 1.16132 24
 0 13 1 6.98686 1.12781 7
 0 13 1 5.65643 0.80483 20
 0 13 1 7.75912 1.12442 7
 0 13 1 5.5067 1.02213 12
 0 13 1 5.37279 0.8489 4
 0 13 1 7.56966 1.08073 22
 -1 -13 -1 7.60866 0.94977 9
 -1 -13 -1 9.39812 1.04136 2
 -1 -13 -1 6.79384 1.30186 7
 -1 -13 -1 6.73438 1.00195 7
 -1 -13 -1 7.01479 1.00314 10
 -1 -13 -1 7.99867 0.75174 23
 -1 -13 -1 6.78849 1.43747 31
 1 13 1 10.1505 1.18645 12
 1 13 1 8.74373 1.29231 7
 1 13 1 9.22511 1.27916 7
 1 13 1 6.71182 0.97768 8
 1 13 1 7.43997 1.5792 30
 1 13 1 10.4512 1.43076 24
 1 13 1 8.70422 1.05685 11
 1 13 1 7.53593 0.91372 4
 -2 -13 -1 1.71326 1.29568 31
 -2 -13 -1 2.71814 1.0012 10
 -2 -13 -1 0.26616 1.31348 13
 -2 -13 -1 2.51524 0.83944 9
 -2 -13 -1 0.81306 0.99881 7
 -2 -13 -1 1.52252 1.0264 14
 -2 -13 -1 0.67568 1.3439 7
 -2 -13 -1 0.05308 0.83511 2
 2 13 1 2.29374 1.33017 30
 2 13 1 4.49426 1.21084 7
 2 13 1 0.39285 0.88589 4
 2 13 1 1.1502 1.42365 32
 2 13 1 1.219 1.10031 7
 2 13 1 0.32855 1.01635 8
 2 13 1 0.23563 0.79802 11
 2 13 1 0.42087 1.33801 24
 2 13 1 1.73414 1.08348 12
 4 -14 -1 3.82224 1.28142 12
 4 -14 -1 7.61961 1.22172 7
 -4 14 1 6.0842 1.33016 10
 -4 14 1 5.38885 1.04369 4
 -4 14 1 4.14949 1.23319 8
 -4 14 1 4.05465 1.38347 7
 3 -14 -1 9.67523 1.25541 7
 3 -14 -1 12.678 1.89372 28
 3 -14 -1 11.6584 1.86024 31
 3 -14 -1 10.4639 0.96713 3
 3 -14 -1 12.4017 1.3709 10
 3 -14 -1 10.8025 1.51176 9
 3 -14 -1 11.844 1.03582 6
 3 -14 -1 11.0316 1.37738 12
 3 -14 -1 7.91175 1.68269 7
 -3 14 1 11.3601 1.31695 10
 -3 14 1 11.5497 1.81465 30
 -3 14 1 15.0155 1.70275 4
 -3 14 1 12.068 1.44376 7
 -3 14 1 9.90789 1.36253 7
 -3 14 1 10.8211 1.19663 5
 -3 14 1 9.95917 1.28468 8
 -3 14 1 9.30814 1.34981 12
 2 -14 -1 6.40778 1.56382 7
 2 -14 -1 5.26018 1.22596 12
 2 -14 -1 5.92129 1.55979 31
 2 -14 -1 7.78264 0.87592 3
 2 -14 -1 4.11393 0.76547 2
 2 -14 -1 4.89086 1.12679 10
 2 -14 -1 8.98738 1.17083 7
 2 -14 -1 6.6588 1.29204 9
 2 -14 -1 7.30732 1.8217 28
 2 -14 -1 7.62075 0.86168 6
 -2 14 1 3.87676 0.93563 4
 -2 14 1 7.31494 1.19821 20
 -2 14 1 8.30135 1.28113 7
 -2 14 1 5.63694 1.47691 30
 -2 14 1 8.11326 1.24582 7
 -2 14 1 6.77245 1.15635 8
 -2 14 1 5.25944 1.15247 12
 -2 14 1 3.24749 1.11587 24
 1 -14 -1 9.12873 0.89665 3
 1 -14 -1 12.1772 2.05977 28
 1 -14 -1 8.51192 1.23623 12
 1 -14 -1 9.77148 0.85253 6
 1 -14 -1 8.38822 1.56721 7
 1 -14 -1 8.18169 1.14638 10
 1 -14 -1 7.7344 1.11185 7
 1 -14 -1 7.74025 0.7938 2
 1 -14 -1 7.44049 1.62557 31
 1 -14 -1 9.08365 1.29708 9
 -1 14 1 9.10601 1.27161 7
 -1 14 1 7.94122 1.26226 12
 -1 14 1 9.57169 1.2791 7
 -1 14 1 7.09427 1.59208 30
 -1 14 1 11.5598 1.09266 22
 -1 14 1 7.39373 1.02517 4
 -1 14 1 9.15069 1.15813 8
 -1 14 1 6.95373 1.25686 24
 -1 14 1 9.48827 1.07067 20
 0 -14 -1 2.74072 1.48943 31
 0 -14 -1 5.74668 0.83969 3
 0 -14 -1 4.79286 0.88467 2
 0 -14 -1 6.08734 1.45141 7
 0 -14 -1 3.6201 0.98877 9
 0 -14 -1 3.23003 1.02656 7
 0 -14 -1 5.76356 1.07898 10
 0 14 1 4.43435 1.21227 7
 0 14 1 3.58317 0.99606 4
 0 14 1 5.76125 1.64369 30
 0 14 1 5.48879 1.2612 7
 0 14 1 5.76241 1.18358 12
 0 14 1 5.03972 1.05223 8
 0 14 1 4.99508 1.18167 22
 0 14 1 2.50125 1.34826 24
 0 14 -2 53.5342 2.09635 8
 0 14 -2 51.5971 3.03213 7
 0 14 -2 58.932 2.70602 22
 0 14 -2 58.821 2.50866 12
 0 14 -2 46.1756 2.88549 11
 0 14 -2 51.6748 2.32634 4
 0 14 -2 57.8018 2.54722 7
 0 14 -2 51.4288 3.1047 30
 0 -14 2 50.9391 2.75748 7
 0 -14 2 57.1733 3.31071 31
 0 -14 2 55.4141 2.71739 10
 0 -14 2 54.1164 2.33144 3
 0 -14 2 52.3022 2.42939 2
 0 -14 2 58.8525 2.81709 7
 0 -14 2 52.2879 2.4085 12
 -1 14 -2 16.6568 1.44643 22
 -1 14 -2 12.4824 1.1909 4
 -1 14 -2 14.1397 1.54972 24
 -1 14 -2 15.9867 1.68399 7
 -1 14 -2 13.8645 1.13241 8
 -1 14 -2 13.6056 1.27119 7
 -1 14 -2 12.6647 1.91545 30
 -1 14 -2 12.4221 1.56962 11
 1 -14 2 15.2458 1.71401 2
 1 -14 2 13.2355 1.42095 10
 1 -14 2 15.4152 1.71457 3
 1 -14 2 12.6224 1.2981 12
 1 -14 2 13.2508 1.40558 7
 1 -14 2 13.3018 1.59443 7
 1 -14 2 11.0795 1.20796 9
 1 -14 2 12.5875 1.90587 31
 -2 14 -2 3.57004 0.84316 4
 -2 14 -2 4.31899 0.99054 8
 -2 14 -2 5.7925 0.99397 7
 -2 14 -2 4.14947 1.61851 30
 -2 14 -2 4.17442 1.48018 7
 2 -14 2 7.11666 1.7172 28
 2 -14 2 4.29177 1.13443 12
 2 -14 2 3.57184 1.15787 10
 2 -14 2 7.2314 1.32301 7
 2 -14 2 5.57039 0.94989 3
 2 -14 2 4.99627 0.92921 2
 2 -14 2 5.76338 0.78896 6
 2 -14 2 2.93625 1.55432 31
 2 -14 2 4.76643 1.39495 7
 -3 14 -2 1.20438 1.50367 30
 -3 14 -2 2.47513 1.49439 7
 -3 14 -2 0.76292 1.16248 10
 -3 14 -2 0.29277 1.39549 24
 -3 14 -2 2.06867 0.99657 7
 -3 14 -2 1.09147 0.96381 8
 -3 14 -2 0.51305 0.88083 5
 -3 14 -2 0.06322 0.72357 4
 3 -14 2 1.89509 0.82592 2
 3 -14 2 0.8756 0.89733 3
 3 -14 2 0.62905 1.2222 10
 3 -14 2 -0.6857 1.111 12
 3 -14 2 1.21012 1.14356 7
 3 -14 2 -0.0893 1.14922 7
 3 -14 2 1.56746 0.84269 17
 3 -14 2 -0.511 1.38746 28
 3 -14 2 0.37101 1.43881 31
 2 13 -2 6.87389 1.58765 30
 2 13 -2 3.45248 1.29852 26
 2 13 -2 4.89449 0.92774 8
 2 13 -2 5.21157 1.00493 12
 2 13 -2 6.40041 1.47202 22
 2 13 -2 6.66095 1.29599 11
 2 13 -2 4.22294 1.04102 7
 2 13 -2 6.29516 1.68541 32
 2 13 -2 6.83056 1.36532 7
 2 13 -2 5.62218 1.25747 24
 2 13 -2 5.9281 0.97363 4
 -2 -13 2 6.12079 1.04848 23
 -2 -13 2 5.24223 1.20048 10
 -2 -13 2 4.23371 0.97765 2
 -2 -13 2 4.76221 1.21984 7
 -2 -13 2 3.60061 1.23388 7
 -2 -13 2 4.67485 1.43798 31
 -2 -13 2 4.32351 0.8652 9
 -2 -13 2 4.50917 0.80293 14
 -2 -13 2 5.117 1.03567 4
 1 13 -2 25.6472 2.02002 24
 1 13 -2 23.4731 1.7537 7
 1 13 -2 23.5628 1.52864 8
 1 13 -2 20.6896 1.73693 12
 1 13 -2 23.9487 2.22923 22
 1 13 -2 23.4055 2.30971 7
 1 13 -2 18.4402 2.0011 30
 1 13 -2 19.4372 2.08611 11
 1 13 -2 16.2756 1.66645 4
 -1 -13 2 20.7826 1.67822 2
 -1 -13 2 19.4085 1.66243 7
 -1 -13 2 21.9434 1.94447 10
 -1 -13 2 23.3327 1.68604 9
 -1 -13 2 19.9557 1.86261 23
 -1 -13 2 25.166 2.07922 7
 -1 -13 2 22.4496 2.4124 31
 -1 -13 2 20.8058 1.73815 4
 0 13 -2 35.6817 2.16614 11
 0 13 -2 31.9511 2.15018 24
 0 13 -2 31.2787 2.54719 30
 0 13 -2 34.8175 2.35416 7
 0 13 -2 31.3071 1.70647 4
 0 13 -2 36.4056 1.90439 7
 0 13 -2 36.1881 2.15123 22
 0 13 -2 35.6642 1.61734 8
 0 13 -2 33.0664 1.85045 12
 0 -13 2 35.689 1.8545 12
 0 -13 2 34.4474 1.83823 9
 0 -13 2 30.1597 1.82668 4
 0 -13 2 35.0374 1.72803 3
 0 -13 2 32.4585 1.81975 2
 0 -13 2 32.0954 2.103 10
 0 -13 2 32.3411 2.55638 31
 0 -13 2 35.2716 2.13923 7
 0 -13 2 31.3228 2.0746 7
 -1 13 -2 22.9395 2.16373 7
 -1 13 -2 22.1467 1.4735 8
 -1 13 -2 21.3053 2.00795 24
 -1 13 -2 20.3709 1.74913 22
 -1 13 -2 17.7231 1.32338 12
 -1 13 -2 19.1924 2.19604 30
 -1 13 -2 17.4777 1.40673 4
 -1 13 -2 21.778 2.00692 11
 -1 13 -2 20.9412 1.64353 7
 1 -13 2 21.509 1.94424 10
 1 -13 2 19.4435 1.66575 12
 1 -13 2 19.0469 1.91573 7
 1 -13 2 19.1671 1.84029 7
 1 -13 2 22.4371 1.53562 2
 1 -13 2 19.9458 1.46628 3
 1 -13 2 18.4041 1.9386 31
 1 -13 2 21.9695 1.61237 9
 -2 13 -2 2.12914 0.92481 24
 -2 13 -2 2.71061 0.68805 4
 -2 13 -2 3.58982 1.15959 7
 -2 13 -2 2.36428 0.8236 7
 -2 13 -2 2.27621 0.80968 8
 -2 13 -2 0.65038 1.24474 30
 2 -13 2 3.15414 1.11783 7
 2 -13 2 2.83002 0.89234 12
 2 -13 2 2.58632 0.91966 10
 2 -13 2 1.60864 0.67595 17
 2 -13 2 2.99032 0.70344 6
 2 -13 2 2.48566 0.76247 3
 2 -13 2 2.68601 0.68269 2
 2 -13 2 1.52276 1.33619 31
 2 -13 2 3.17278 1.02896 7
 -3 13 -2 0.7299 0.77983 8
 -3 13 -2 0.72033 0.94174 10
 -3 13 -2 -0.6641 0.97528 24
 -3 13 -2 -0.7796 0.83377 7
 -3 13 -2 -0.8342 0.57013 4
 -3 13 -2 -0.0216 1.26452 30
 -3 13 -2 -0.597 0.66454 5
 -3 13 -2 0.62492 1.13781 7
 3 -13 2 0.85402 0.57395 2
 3 -13 2 0.13774 0.72793 3
 3 -13 2 -0.7051 1.09631 28
 3 -13 2 0.7537 0.94797 7
 3 -13 2 0.2358 0.78707 17
 3 -13 2 -0.4174 1.22806 31
 3 -13 2 0.20295 0.95216 10
 3 -13 2 0.50603 0.92151 12
 3 -13 2 -1.8084 0.858 7
 -4 13 -2 2.26128 1.04852 10
 -4 13 -2 0.20515 1.2274 30
 -4 13 -2 2.24359 0.79733 5
 -4 13 -2 -0.7884 0.55168 4
 -4 13 -2 -0.3381 1.19998 7
 -4 13 -2 3.48792 1.09127 16
 -4 13 -2 0.9818 0.9005 8
 -4 13 -2 0.05904 0.95246 7
 -4 13 -2 1.65011 1.25567 24
 4 -13 2 1.64373 1.07003 7
 4 -13 2 0.04695 1.293 31
 4 -13 2 0.418 0.92192 17
 4 -13 2 0.44178 0.95813 28
 4 -13 2 -0.3403 0.99694 12
 4 -13 2 1.0863 0.80729 3
 4 -13 2 1.72339 0.97985 7
 4 -13 2 2.10419 0.66901 2
 4 -13 2 -0.0447 1.00164 10
 -5 13 -2 10.5828 1.38271 10
 -5 13 -2 6.90225 1.13005 8
 -5 13 -2 11.4471 1.30064 16
 -5 13 -2 11.1162 1.76887 24
 -5 13 -2 10.804 1.32694 7
 -5 13 -2 10.485 1.02769 5
 -5 13 -2 11.07 1.68795 7
 5 -13 2 10.1806 1.17959 8
 5 -13 2 8.1666 1.0606 2
 5 -13 2 8.97838 1.33122 12
 5 -13 2 8.64071 1.07848 3
 5 -13 2 8.63281 1.74976 31
 5 -13 2 11.2636 1.61166 7
 5 -13 2 9.5452 1.38065 10
 5 -13 2 9.58182 1.42924 13
 5 -13 2 10.8169 1.47535 7
 5 -13 2 5.2324 1.52917 32
 4 12 -2 12.1415 1.6818 30
 4 12 -2 12.7936 1.16256 12
 4 12 -2 18.1396 2.05747 5
 4 12 -2 16.6057 1.85025 7
 4 12 -2 15.9388 1.95642 32
 4 12 -2 17.4028 1.95191 7
 4 12 -2 15.8268 1.87004 24
 -4 -12 2 12.7331 1.30948 9
 -4 -12 2 22.4285 2.37489 7
 -4 -12 2 16.3114 1.54807 10
 -4 -12 2 14.9334 1.81649 2
 -4 -12 2 17.5874 2.08512 31
 -4 -12 2 17.6638 1.54237 14
 -4 -12 2 16.1702 1.64259 7
 -4 -12 2 14.1598 1.32148 4
 3 12 -2 4.00241 1.22119 24
 3 12 -2 1.96714 0.87651 8
 3 12 -2 3.87795 1.02221 11
 3 12 -2 3.21282 0.87781 12
 3 12 -2 1.21544 1.3024 30
 3 12 -2 2.67815 0.93354 7
 3 12 -2 2.23158 1.16042 26
 3 12 -2 2.4711 1.42301 32
 3 12 -2 1.28169 1.13596 7
 3 12 -2 2.31369 0.88302 4
 -3 -12 2 2.17971 0.81788 9
 -3 -12 2 1.2846 1.0288 10
 -3 -12 2 2.4468 0.94853 14
 -3 -12 2 2.67745 1.05865 7
 -3 -12 2 3.36033 1.08226 7
 -3 -12 2 2.42344 0.90748 4
 -3 -12 2 3.32185 0.87271 2
 -3 -12 2 2.67252 1.31213 31
 2 12 -2 8.55841 1.00645 7
 2 12 -2 7.57211 1.25404 7
 2 12 -2 8.78256 0.95843 4
 2 12 -2 7.68483 1.18971 26
 2 12 -2 7.70166 0.85791 8
 2 12 -2 6.57702 1.54045 32
 2 12 -2 7.49814 1.13108 24
 2 12 -2 7.69282 1.19507 11
 2 12 -2 6.89182 1.453 30
 2 12 -2 7.19851 0.92708 12
 -2 -12 2 7.86264 1.1545 7
 -2 -12 2 8.45332 1.07978 10
 -2 -12 2 8.05664 0.99044 2
 -2 -12 2 8.30933 0.82262 14
 -2 -12 2 7.83487 1.11868 7
 -2 -12 2 9.39086 1.01618 9
 -2 -12 2 10.0126 0.98502 23
 -2 -12 2 8.84263 1.00341 4
 -2 -12 2 8.85363 1.51418 31
 1 12 -2 23.7295 1.91534 22
 1 12 -2 22.96 1.77642 11
 1 12 -2 23.4314 1.34389 8
 1 12 -2 21.8432 1.51142 12
 1 12 -2 22.9823 1.81856 24
 1 12 -2 24.3616 2.16947 30
 1 12 -2 22.615 1.54947 7
 1 12 -2 22.6792 1.98401 7
 1 12 -2 22.1621 1.44606 4
 -1 -12 2 24.0758 1.53677 9
 -1 -12 2 22.9014 1.73047 10
 -1 -12 2 22.3925 1.73799 7
 -1 -12 2 26.1105 1.83379 7
 -1 -12 2 24.8084 1.58681 4
 -1 -12 2 21.807 1.4405 2
 -1 -12 2 22.6447 1.64668 23
 -1 -12 2 21.341 2.20707 31
 0 12 -2 30.2641 1.53134 4
 0 12 -2 31.6847 1.93743 11
 0 12 -2 31.1177 2.3126 30
 0 12 -2 31.1336 1.43657 8
 0 12 -2 36.3549 2.07701 24
 0 12 -2 30.5459 2.0591 7
 0 12 -2 35.3266 1.72044 7
 0 12 -2 31.6221 1.85366 22
 0 12 -2 31.8004 1.64158 12
 0 -12 2 32.8325 1.67809 2
 0 -12 2 33.7004 1.67087 4
 0 -12 2 31.3648 1.81925 7
 0 -12 2 29.773 1.63169 9
 0 -12 2 34.8997 1.88552 10
 0 -12 2 29.7618 1.49668 3
 0 -12 2 28.0486 1.55116 12
 0 -12 2 29.7543 2.36734 31
 0 -12 2 31.9424 1.8759 7
 -1 12 -2 23.5837 1.86303 24
 -1 12 -2 21.4691 2.13702 30
 -1 12 -2 24.787 1.33503 8
 -1 12 -2 24.9424 1.58773 12
 -1 12 -2 23.6016 1.89022 7
 -1 12 -2 23.2513 1.62594 22
 -1 12 -2 28.4271 1.55766 7
 -1 12 -2 24.5472 1.38486 4
 1 -12 2 23.1441 1.71101 10
 1 -12 2 20.9027 2.22482 31
 1 -12 2 24.768 1.48612 12
 1 -12 2 25.8049 1.81773 7
 1 -12 2 22.7258 1.43053 2
 1 -12 2 25.126 1.35801 3
 1 -12 2 26.3902 1.67883 7
 -2 12 -2 2.065 0.90423 24
 -2 12 -2 0.96218 0.52848 4
 -2 12 -2 1.55323 1.07062 30
 -2 12 -2 2.06361 0.93827 7
 -2 12 -2 1.67853 0.76767 22
 -2 12 -2 0.8866 0.72112 7
 -2 12 -2 1.03915 0.78703 10
 -2 12 -2 1.60443 0.6523 8
 2 -12 2 -0.5534 0.78683 10
 2 -12 2 0.92767 0.60899 17
 2 -12 2 1.11784 0.50801 2
 2 -12 2 1.68887 0.62451 3
 2 -12 2 0.69345 0.70398 12
 2 -12 2 -0.0218 1.07608 31
 2 -12 2 0.91387 0.85094 7
 2 -12 2 0.3973 0.72173 7
 -3 12 -2 3.62644 1.02163 7
 -3 12 -2 1.98968 0.75879 7
 -3 12 -2 2.07012 0.65782 5
 -3 12 -2 2.37086 0.93313 24
 -3 12 -2 2.25249 1.19559 30
 -3 12 -2 3.36022 0.73868 8
 -3 12 -2 2.62516 0.86205 10
 -3 12 -2 1.47873 0.55086 4
 3 -12 2 2.63999 0.92879 10
 3 -12 2 4.00822 0.67255 2
 3 -12 2 2.65621 1.24408 31
 3 -12 2 2.89481 0.70587 3
 3 -12 2 2.18369 0.81401 12
 3 -12 2 2.37116 0.73526 17
 3 -12 2 1.6297 0.91504 7
 3 -12 2 2.51744 0.89509 7
 3 -12 2 1.45245 0.97231 28
 -4 12 -2 18.1879 1.67105 24
 -4 12 -2 14.4961 1.47009 8
 -4 12 -2 17.2287 1.86456 30
 -4 12 -2 13.7091 1.17058 4
 -4 12 -2 16.3282 1.58335 7
 -4 12 -2 15.2687 1.45022 7
 -4 12 -2 18.1773 1.27301 5
 -4 12 -2 18.2347 1.68749 16
 -4 12 -2 23.2757 1.78727 10
 4 -12 2 17.549 1.76891 7
 4 -12 2 18.3682 1.81069 10
 4 -12 2 16.0727 1.30733 2
 4 -12 2 13.768 1.66202 31
 4 -12 2 17.1801 1.43723 3
 4 -12 2 18.1508 1.86964 32
 4 -12 2 16.2139 1.69843 7
 4 -12 2 17.4578 1.62227 12
 -5 12 -2 14.0227 1.08507 25
 -5 12 -2 13.6106 1.49734 7
 -5 12 -2 12.0709 1.25501 7
 -5 12 -2 8.6989 0.87595 4
 -5 12 -2 9.99907 1.06719 8
 -5 12 -2 12.4276 1.68736 24
 -5 12 -2 11.9714 1.20519 10
 -5 12 -2 13.3101 1.29319 5
 -5 12 -2 13.2847 1.15387 16
 5 -12 2 9.35006 1.56103 31
 5 -12 2 11.9113 1.09292 3
 5 -12 2 10.9987 1.26196 13
 5 -12 2 10.6717 1.01455 2
 5 -12 2 11.9691 1.2022 12
 5 -12 2 15.066 1.43213 7
 5 -12 2 10.5257 1.37655 7
 5 -12 2 12.4466 1.07329 8
 5 -12 2 13.3691 1.78951 32
 5 -12 2 12.5282 1.29501 10
 -6 12 -2 11.2822 1.05407 5
 -6 12 -2 12.2817 1.12067 16
 -6 12 -2 13.3502 1.37 10
 -6 12 -2 9.49333 1.53924 7
 -6 12 -2 13.2565 1.27855 25
 -6 12 -2 12.7616 1.37485 7
 -6 12 -2 9.14463 1.80184 24
 -6 12 -2 9.68147 0.93188 4
 6 -12 2 12.1384 1.36868 13
 6 -12 2 11.1934 1.10306 3
 6 -12 2 16.4755 1.73489 8
 6 -12 2 8.02412 1.69462 32
 6 -12 2 10.7376 1.28588 12
 6 -12 2 10.0464 1.67539 31
 6 -12 2 8.58345 0.9779 2
 6 -12 2 10.5188 1.41518 7
 6 -12 2 10.4173 1.47145 7
 5 11 -2 12.9174 1.17884 12
 5 11 -2 12.9264 1.77268 24
 5 11 -2 9.03558 1.75288 30
 5 11 -2 8.97256 1.54788 7
 5 11 -2 12.0081 1.35467 5
 5 11 -2 11.1847 1.83804 32
 5 11 -2 11.4161 1.29956 7
 5 11 -2 15.1126 1.49889 17
 -5 -11 2 10.6052 1.68439 31
 -5 -11 2 12.2405 1.27892 4
 -5 -11 2 14.0286 1.5057 7
 -5 -11 2 11.2459 1.43639 10
 -5 -11 2 11.8668 1.59006 7
 -5 -11 2 10.8617 1.84888 24
 -5 -11 2 10.5963 1.28277 9
 -5 -11 2 14.6049 1.68957 2
 4 11 -2 7.62777 1.02592 11
 4 11 -2 6.15924 1.50363 32
 4 11 -2 5.31882 1.0278 5
 4 11 -2 7.27307 1.38861 24
 4 11 -2 5.54202 1.13297 26
 4 11 -2 6.11622 0.94598 7
 4 11 -2 4.49704 1.38987 30
 4 11 -2 6.71004 1.3485 7
 4 11 -2 6.61303 1.09937 17
 4 11 -2 6.72203 0.935 12
 -4 -11 2 6.34479 1.14618 10
 -4 -11 2 5.14746 1.11324 7
 -4 -11 2 5.73414 0.98095 4
 -4 -11 2 3.88867 0.8648 2
 -4 -11 2 4.77056 1.40559 31
 -4 -11 2 6.02991 1.19358 7
 -4 -11 2 6.08185 0.97643 9
 -4 -11 2 5.85812 1.02356 13
 3 11 -2 2.73534 1.24584 30
 3 11 -2 5.62109 0.88791 11
 3 11 -2 3.73309 1.05137 24
 3 11 -2 3.64187 0.99973 26
 3 11 -2 3.18466 1.24739 32
 3 11 -2 3.97091 0.80861 7
 3 11 -2 3.75735 0.78051 12
 3 11 -2 5.70889 1.15699 7
 3 11 -2 4.72374 0.80747 4
 -3 -11 2 4.73761 1.31619 31
 -3 -11 2 3.33049 0.92233 10
 -3 -11 2 1.96496 0.78165 4
 -3 -11 2 4.71063 0.74483 2
 -3 -11 2 4.23632 0.78096 23
 -3 -11 2 3.80575 0.97933 7
 -3 -11 2 4.88864 0.99304 7
 -3 -11 2 3.7319 0.75234 9
 2 11 -2 17.8135 1.69474 24
 2 11 -2 20.4651 1.36496 12
 2 11 -2 18.635 1.74726 7
 2 11 -2 17.4927 1.58635 26
 2 11 -2 16.6482 1.55885 11
 2 11 -2 19.8734 1.36808 4
 2 11 -2 19.2043 1.42241 7
 2 11 -2 17.8128 2.00318 30
 2 11 -2 17.8895 1.23642 8
 2 11 -2 16.8186 1.74552 32
 -2 -11 2 15.944 1.60938 7
 -2 -11 2 20.2251 2.0783 31
 -2 -11 2 17.6672 1.57499 10
 -2 -11 2 16.8936 1.21794 14
 -2 -11 2 20.0949 1.33897 9
 -2 -11 2 19.0067 1.56452 7
 -2 -11 2 19.6279 1.41781 4
 -2 -11 2 17.2509 1.37497 23
 -2 -11 2 18.0307 1.32703 2
 1 11 -2 64.3702 2.48466 11
 1 11 -2 71.2907 2.55823 7
 1 11 -2 72.4725 2.35622 7
 1 11 -2 68.9498 2.55441 24
 1 11 -2 66.5207 2.85717 30
 1 11 -2 70.6864 2.42467 22
 1 11 -2 65.1018 2.16898 4
 1 11 -2 67.8525 1.9128 8
 1 11 -2 66.1716 2.02902 12
 -1 -11 2 69.6641 2.4694 7
 -1 -11 2 62.2424 2.8662 31
 -1 -11 2 63.9781 2.46622 7
 -1 -11 2 65.4002 2.35059 10
 -1 -11 2 61.5654 2.22952 4
 -1 -11 2 67.1769 1.74062 14
 -1 -11 2 68.4043 2.32631 2
 -1 -11 2 69.5363 2.3324 9
 0 11 -2 37.9654 1.42086 8
 0 11 -2 35.4502 2.2365 30
 0 11 -2 40.918 1.96875 7
 0 11 -2 39.3778 1.78523 22
 0 11 -2 43.851 2.12133 24
 0 11 -2 42.1272 1.91472 11
 0 11 -2 37.9694 1.59812 12
 0 11 -2 41.3857 1.70007 7
 0 11 -2 40.4095 1.61076 4
 0 -11 2 41.7707 1.8705 7
 0 -11 2 39.4405 1.81078 10
 0 -11 2 33.6083 1.64987 4
 0 -11 2 39.4274 1.73069 9
 0 -11 2 40.1658 1.54961 12
 0 -11 2 39.7111 1.68058 2
 0 -11 2 42.0731 1.87302 7
 0 -11 2 39.4482 1.56264 3
 0 -11 2 35.5625 2.33325 31
 -1 11 -2 29.0808 1.4941 12
 -1 11 -2 25.6558 1.72424 7
 -1 11 -2 27.2777 1.22954 8
 -1 11 -2 28.8795 1.31975 4
 -1 11 -2 27.3203 1.77957 24
 -1 11 -2 25.8788 2.00476 30
 -1 11 -2 28.6555 1.48025 7
 -1 11 -2 30.2934 1.49547 22
 1 -11 2 24.9504 1.27138 3
 1 -11 2 27.425 1.38754 12
 1 -11 2 25.8872 1.16072 17
 1 -11 2 26.9046 1.58667 10
 1 -11 2 25.0778 0.93234 6
 1 -11 2 25.9721 1.6472 7
 1 -11 2 28.0218 1.5811 7
 1 -11 2 24.8209 1.40359 4
 1 -11 2 28.099 1.41166 2
 1 -11 2 25.7564 2.13966 31
 -2 11 -2 34.7158 2.17404 30
 -2 11 -2 39.0842 1.73773 10
 -2 11 -2 38.6344 1.96423 24
 -2 11 -2 36.3149 1.72058 7
 -2 11 -2 39.3092 1.96495 7
 -2 11 -2 39.0692 1.52865 4
 -2 11 -2 38.4927 1.45246 8
 -2 11 -2 39.9525 1.59059 22
 2 -11 2 40.0772 1.83818 7
 2 -11 2 38.5746 1.64826 2
 2 -11 2 39.8983 1.61363 12
 2 -11 2 40.2436 1.54113 3
 2 -11 2 35.9016 2.29562 31
 2 -11 2 36.7133 1.81393 10
 2 -11 2 37.1302 1.40847 17
 2 -11 2 36.9406 1.82202 7
 -3 11 -2 10.0157 0.97586 5
 -3 11 -2 11.9288 1.28832 7
 -3 11 -2 13.2909 1.30761 10
 -3 11 -2 10.6672 1.13522 24
 -3 11 -2 11.4285 1.15517 7
 -3 11 -2 10.6813 1.41738 30
 -3 11 -2 10.2401 0.96809 4
 -3 11 -2 11.4674 1.10275 8
 3 -11 2 11.6264 1.04306 2
 3 -11 2 12.1273 1.14316 3
 3 -11 2 10.714 0.93915 12
 3 -11 2 12.7722 1.44343 7
 3 -11 2 11.2121 1.0464 28
 3 -11 2 12.0296 1.11597 10
 3 -11 2 9.06993 1.39658 31
 3 -11 2 10.8863 1.09794 7
 -4 11 -2 5.31005 0.78066 25
 -4 11 -2 3.75498 1.05358 24
 -4 11 -2 3.68734 0.77649 7
 -4 11 -2 3.44721 0.75372 8
 -4 11 -2 3.58756 0.91103 7
 -4 11 -2 3.44177 0.58378 4
 -4 11 -2 4.07538 1.25892 30
 -4 11 -2 4.11625 0.82505 16
 -4 11 -2 4.13684 0.62423 5
 -4 11 -2 4.91569 0.831 10
 4 -11 2 4.02545 0.8193 12
 4 -11 2 3.86633 1.06023 31
 4 -11 2 4.78016 0.89111 10
 4 -11 2 3.62766 0.7097 3
 4 -11 2 5.06108 0.86743 7
 4 -11 2 3.77995 0.70411 8
 4 -11 2 3.85415 0.84712 7
 4 -11 2 3.69843 0.64004 2
 4 -11 2 4.99737 1.32166 32
 -5 11 -2 18.1186 1.44808 16
 -5 11 -2 18.5486 1.51654 25
 -5 11 -2 21.4724 2.27382 24
 -5 11 -2 21.1349 1.62073 10
 -5 11 -2 21.7635 1.83187 7
 -5 11 -2 21.0608 1.6122 7
 -5 11 -2 18.2545 1.20784 4
 -5 11 -2 18.0536 1.20835 5
 -5 11 -2 17.1505 1.43623 8
 5 -11 2 15.1526 1.24576 2
 5 -11 2 18.0114 1.68585 7
 5 -11 2 20.0351 1.77515 10
 5 -11 2 17.6686 1.34994 3
 5 -11 2 18.9603 1.34563 8
 5 -11 2 14.6547 1.65412 31
 5 -11 2 18.6243 1.71936 13
 5 -11 2 17.5622 1.55397 12
 5 -11 2 15.2526 1.71255 32
 5 -11 2 20.0978 1.73956 7
 -6 11 -2 15.6205 1.29082 4
 -6 11 -2 11.8519 0.98025 16
 -6 11 -2 15.5725 1.67524 10
 -6 11 -2 10.3655 1.19966 25
 -6 11 -2 13.9324 1.44675 7
 -6 11 -2 11.3491 1.26925 5
 -6 11 -2 10.6509 1.10735 7
 6 -11 2 9.73123 1.19072 7
 6 -11 2 13.9302 1.49532 8
 6 -11 2 14.0811 1.40794 7
 6 -11 2 12.9208 1.14404 12
 6 -11 2 9.92713 1.19125 13
 6 -11 2 9.33338 1.64363 32
 6 -11 2 12.2116 1.4307 3
 6 -11 2 9.94184 0.96572 2
 -7 11 -2 1.97897 0.71351 4
 -7 11 -2 1.56338 0.99996 10
 -7 11 -2 0.10114 1.17733 7
 -7 11 -2 0.31552 1.05044 11
 -7 11 -2 0.71803 0.84791 5
 -7 11 -2 1.91674 1.23636 25
 -7 11 -2 0.01521 0.88813 3
 -7 11 -2 -0.5681 0.92449 7
 7 -11 2 0.3828 0.93061 3
 7 -11 2 -1.8282 0.86476 12
 7 -11 2 1.06191 1.11308 13
 7 -11 2 2.29019 1.08894 19
 7 -11 2 0.83865 1.15861 7
 7 -11 2 1.21431 1.38941 32
 7 -11 2 0.31498 1.17862 7
 7 -11 2 1.08267 0.97602 8
 7 -11 2 -1.1508 0.79861 2
 6 10 -2 3.71805 1.03681 5
 6 10 -2 5.17346 1.05785 2
 6 10 -2 4.99375 1.46906 17
 6 10 -2 5.90727 1.57064 30
 6 10 -2 5.82578 1.7822 24
 6 10 -2 7.01142 1.6252 7
 6 10 -2 6.45002 1.80427 32
 6 10 -2 3.78595 1.09272 7
 6 10 -2 5.36085 1.03101 12
 -6 -10 2 5.46796 1.31298 9
 -6 -10 2 3.99453 1.37438 7
 -6 -10 2 5.61147 1.10522 4
 -6 -10 2 7.21404 1.30228 27
 -6 -10 2 5.60493 1.2624 7
 -6 -10 2 7.23703 1.64632 31
 -6 -10 2 5.13392 1.80951 24
 5 10 -2 26.0821 2.45283 30
 5 10 -2 28.5112 1.78832 2
 5 10 -2 29.951 1.83131 11
 5 10 -2 21.1647 2.42707 32
 5 10 -2 27.2295 2.44623 24
 5 10 -2 30.9768 1.69775 12
 5 10 -2 27.7975 2.43956 7
 5 10 -2 26.6007 1.83868 7
 5 10 -2 24.6177 2.01732 17
 5 10 -2 27.097 1.89893 5
 -5 -10 2 28.2995 2.2058 7
 -5 -10 2 24.6462 2.42529 31
 -5 -10 2 30.645 1.85312 13
 -5 -10 2 29.8391 2.10826 10
 -5 -10 2 26.6294 1.7494 4
 -5 -10 2 26.3255 2.0146 7
 -5 -10 2 28.3535 1.64335 2
 -5 -10 2 23.2535 1.95284 9
 -5 -10 2 32.0219 2.73642 24
 4 10 -2 1.18267 0.65359 11
 4 10 -2 0.37385 1.09018 30
 4 10 -2 1.16912 0.72962 7
 4 10 -2 0.50491 0.54723 15
 4 10 -2 0.42179 0.9267 26
 4 10 -2 -0.2488 0.68216 5
 4 10 -2 -0.2312 0.70583 12
 4 10 -2 0.31939 0.87842 7
 4 10 -2 0.56171 1.20214 32
 4 10 -2 1.43163 1.02928 24
 4 10 -2 0.65742 0.87355 17
 -4 -10 2 0.14518 0.86675 10
 -4 -10 2 0.60854 0.77296 13
 -4 -10 2 0.16476 0.66102 4
 -4 -10 2 -0.5856 0.99619 31
 -4 -10 2 0.19279 1.10529 24
 -4 -10 2 0.01953 0.85884 7
 -4 -10 2 0.04594 0.69665 9
 -4 -10 2 1.74141 0.76827 7
 -4 -10 2 -0.0582 0.57107 2
 3 10 -2 29.7836 1.5148 17
 3 10 -2 28.511 2.14013 30
 3 10 -2 27.4302 1.53029 26
 3 10 -2 28.833 1.69721 11
 3 10 -2 28.3883 1.90324 7
 3 10 -2 26.9651 1.55672 7
 3 10 -2 29.1446 1.37097 12
 3 10 -2 26.654 2.15074 32
 3 10 -2 29.8676 1.46533 4
 3 10 -2 30.6171 1.88115 24
 -3 -10 2 28.43 1.54811 4
 -3 -10 2 25.9398 1.78169 7
 -3 -10 2 29.6435 1.56965 9
 -3 -10 2 28.0453 1.39322 23
 -3 -10 2 29.4791 1.72005 10
 -3 -10 2 29.1791 2.26367 31
 -3 -10 2 28.2899 1.70618 7
 -3 -10 2 28.812 1.44096 2
 2 10 -2 42.6077 1.45864 8
 2 10 -2 38.8604 2.30918 32
 2 10 -2 39.1133 1.92465 24
 2 10 -2 37.5339 2.23345 30
 2 10 -2 41.5856 1.75502 7
 2 10 -2 40.8944 1.9404 7
 2 10 -2 41.7342 1.50477 12
 2 10 -2 39.7721 1.85079 11
 2 10 -2 42.5183 1.64687 4
 2 10 -2 40.6724 1.69438 26
 -2 -10 2 41.9597 1.82006 10
 -2 -10 2 42.0273 1.92198 7
 -2 -10 2 38.4784 2.25606 31
 -2 -10 2 42.6754 1.87522 7
 -2 -10 2 40.7784 1.58094 23
 -2 -10 2 41.5462 1.69371 9
 -2 -10 2 39.6131 1.66329 4
 -2 -10 2 43.7137 1.70187 2
 -2 -10 2 43.8738 1.51451 14
 1 10 -2 68.9202 2.48376 24
 1 10 -2 65.8339 2.67579 30
 1 10 -2 68.8429 2.4031 11
 1 10 -2 71.1085 1.98971 12
 1 10 -2 67.2328 1.84563 8
 1 10 -2 68.1046 2.40017 7
 1 10 -2 70.4171 2.14437 4
 1 10 -2 71.0213 2.28709 7
 -1 -10 2 67.9404 2.25816 10
 -1 -10 2 68.819 2.35864 7
 -1 -10 2 68.6275 2.18561 4
 -1 -10 2 68.5145 2.26958 9
 -1 -10 2 70.0507 2.40332 7
 -1 -10 2 70.1145 2.26835 2
 -1 -10 2 68.467 2.72687 31
 -1 -10 2 70.3951 1.76935 14
 0 10 -2 6.90555 0.9407 24
 0 10 -2 7.58863 0.85041 4
 0 10 -2 6.86464 0.60011 8
 0 10 -2 7.70113 0.72169 12
 0 10 -2 7.54594 0.85027 11
 0 10 -2 6.44439 0.76753 7
 0 10 -2 6.82706 0.84724 7
 0 10 -2 6.86551 1.20546 30
 0 10 -2 7.05105 0.84227 22
 0 -10 2 6.22745 0.77417 7
 0 -10 2 7.83932 0.80429 10
 0 -10 2 7.63991 0.9157 2
 0 -10 2 6.56846 1.14123 31
 0 -10 2 6.499 0.67285 12
 0 -10 2 6.04592 0.7971 7
 0 -10 2 7.67263 0.75138 4
 -1 10 -2 7.89746 1.26392 30
 -1 10 -2 9.09541 0.80718 22
 -1 10 -2 6.74706 0.83736 7
 -1 10 -2 7.67026 0.77673 12
 -1 10 -2 7.4346 0.7761 7
 -1 10 -2 7.23656 0.89653 24
 -1 10 -2 6.76344 0.79926 10
 -1 10 -2 8.63367 0.84184 8
 -1 10 -2 9.08886 0.81754 4
 1 -10 2 8.36926 0.77279 4
 1 -10 2 7.65521 1.1859 31
 1 -10 2 8.94751 0.89412 2
 1 -10 2 8.38431 0.74279 12
 1 -10 2 5.85415 0.80806 7
 1 -10 2 6.85391 0.78252 7
 1 -10 2 8.10174 0.87275 3
 1 -10 2 7.41209 0.8136 10
 1 -10 2 9.06394 0.85912 17
 -2 10 -2 8.96331 0.85825 7
 -2 10 -2 9.77722 0.94358 7
 -2 10 -2 9.32792 0.91484 25
 -2 10 -2 10.6705 0.94211 8
 -2 10 -2 13.0459 1.13211 10
 -2 10 -2 14.0608 1.45663 24
 -2 10 -2 11.2988 0.91503 4
 -2 10 -2 9.89128 1.27487 30
 -2 10 -2 10.2352 0.8089 22
 2 -10 2 10.8554 0.99769 7
 2 -10 2 10.5616 1.31266 31
 2 -10 2 10.7021 0.93408 17
 2 -10 2 11.0503 1.22625 10
 2 -10 2 11.9172 0.93073 3
 2 -10 2 9.25445 0.89501 7
 2 -10 2 10.0333 1.06502 12
 2 -10 2 8.53304 0.97385 2
 -3 10 -2 45.2883 1.4089 25
 -3 10 -2 42.8414 1.94187 7
 -3 10 -2 45.3485 1.87198 7
 -3 10 -2 50.0389 2.171 24
 -3 10 -2 46.3101 1.6619 4
 -3 10 -2 45.9548 2.30683 30
 -3 10 -2 45.4637 1.51144 5
 -3 10 -2 43.8795 1.52728 8
 -3 10 -2 47.524 1.8119 10
 3 -10 2 46.6963 1.91193 10
 3 -10 2 46.0325 1.7966 2
 3 -10 2 46.9435 1.95553 7
 3 -10 2 45.733 1.73448 28
 3 -10 2 47.4096 1.65558 3
 3 -10 2 47.2658 2.39556 31
 3 -10 2 47.3807 1.73194 12
 3 -10 2 46.5174 1.90367 7
 3 -10 2 48.2206 1.52392 8
 3 -10 2 43.5326 2.3144 32
 -4 10 -2 63.4918 2.7353 30
 -4 10 -2 68.0984 2.02648 8
 -4 10 -2 72.1937 2.40159 7
 -4 10 -2 67.8592 2.01266 5
 -4 10 -2 68.3656 2.45386 7
 -4 10 -2 68.6813 2.30559 10
 -4 10 -2 68.7565 2.70113 24
 -4 10 -2 66.082 2.20232 4
 -4 10 -2 72.817 2.10839 16
 -4 10 -2 66.14 1.9362 25
 4 -10 2 68.9179 2.86707 32
 4 -10 2 69.3784 2.41613 10
 4 -10 2 67.5387 2.14371 12
 4 -10 2 71.5567 2.4497 7
 4 -10 2 72.716 2.43608 7
 4 -10 2 66.9447 2.87354 31
 4 -10 2 70.0756 2.35697 2
 4 -10 2 72.2196 1.98954 8
 4 -10 2 67.7661 2.16099 3
 -5 10 -2 22.0919 1.16281 5
 -5 10 -2 23.1093 1.44247 25
 -5 10 -2 24.2719 1.31641 4
 -5 10 -2 23.7533 1.38643 8
 -5 10 -2 23.7493 1.33416 16
 -5 10 -2 25.3056 1.51143 7
 -5 10 -2 24.8565 1.49886 10
 -5 10 -2 24.3057 1.68358 7
 5 -10 2 20.9599 2.03869 32
 5 -10 2 20.5551 1.5834 7
 5 -10 2 23.0211 1.67849 10
 5 -10 2 23.1065 1.60206 7
 5 -10 2 23.1292 1.34086 3
 5 -10 2 22.32 1.57124 13
 5 -10 2 21.6108 1.26652 8
 5 -10 2 21.678 1.97893 31
 5 -10 2 20.5464 1.37468 12
 -6 10 -2 4.16689 0.82622 10
 -6 10 -2 2.55213 1.0105 7
 -6 10 -2 1.11069 0.71289 7
 -6 10 -2 3.60164 0.6611 5
 -6 10 -2 3.49846 0.69574 3
 -6 10 -2 3.63708 0.99571 25
 -6 10 -2 2.74512 0.60404 4
 6 -10 2 3.12595 0.73171 8
 6 -10 2 4.25515 0.9106 7
 6 -10 2 1.34646 0.70834 12
 6 -10 2 4.16106 0.77762 3
 6 -10 2 1.38228 1.22201 32
 6 -10 2 2.59497 0.88954 13
 6 -10 2 3.39942 0.86034 7
 -7 10 -2 1.10221 0.74988 5
 -7 10 -2 2.21441 0.81342 3
 -7 10 -2 2.24677 0.90726 11
 -7 10 -2 1.63098 0.63031 4
 -7 10 -2 1.19355 1.13984 7
 -7 10 -2 0.5653 1.07211 25
 -7 10 -2 0.41823 0.81929 7
 -7 10 -2 2.02098 0.85319 10
 7 -10 2 1.84432 1.02589 7
 7 -10 2 1.81245 0.86126 8
 7 -10 2 -0.2352 0.96329 13
 7 -10 2 1.45083 0.91434 19
 7 -10 2 1.70193 0.75987 12
 7 -10 2 1.8466 1.31983 32
 7 -10 2 1.04058 0.7064 22
 7 -10 2 1.87023 0.96898 7
 7 -10 2 0.87639 0.83306 3
 -8 10 -2 1.9403 1.13166 11
 -8 10 -2 0.89669 1.39372 21
 -8 10 -2 2.47354 0.9809 3
 -8 10 -2 1.91284 1.45454 7
 -8 10 -2 3.21217 1.01479 7
 -8 10 -2 1.33741 0.99751 5
 -8 10 -2 -0.1032 0.90368 4
 -8 10 -2 0.56513 1.11987 10
 -8 10 -2 2.17533 1.26204 25
 8 -10 2 1.3908 0.97733 3
 8 -10 2 0.75769 0.88613 22
 8 -10 2 2.94396 1.06443 8
 8 -10 2 3.82461 0.93959 19
 8 -10 2 1.10681 1.28239 32
 8 -10 2 3.50519 1.19457 7
 8 -10 2 0.72107 1.19289 7
 8 -10 2 2.58479 1.24458 13
 6 9 -2 5.35223 1.50113 24
 6 9 -2 8.5042 1.40777 17
 6 9 -2 3.82647 1.40698 30
 6 9 -2 5.62826 1.4519 7
 6 9 -2 7.08603 0.98977 12
 6 9 -2 4.69095 0.91937 11
 6 9 -2 6.27323 0.9687 5
 6 9 -2 8.46504 0.97281 2
 6 9 -2 5.04144 0.96368 7
 6 9 -2 5.90324 1.73513 32
 -6 -9 2 8.33898 1.16876 9
 -6 -9 2 6.58881 1.13819 7
 -6 -9 2 5.9536 0.94165 13
 -6 -9 2 6.38767 1.4351 31
 -6 -9 2 6.65119 0.96765 4
 -6 -9 2 5.23472 1.578 24
 -6 -9 2 7.41713 1.13872 27
 -6 -9 2 8.98883 1.31006 7
 -6 -9 2 7.01599 1.15292 18
 5 9 -2 1.05273 1.12525 30
 5 9 -2 2.33379 0.77778 12
 5 9 -2 3.76284 0.75566 2
 5 9 -2 2.45317 1.00754 17
 5 9 -2 2.04314 1.23098 32
 5 9 -2 1.12607 1.0895 24
 5 9 -2 3.11424 1.08432 7
 5 9 -2 4.37273 0.76467 11
 5 9 -2 1.43372 0.68813 5
 5 9 -2 2.43296 0.7525 7
 -5 -9 2 2.59268 0.76279 4
 -5 -9 2 2.90237 0.66179 2
 -5 -9 2 1.56926 0.85483 9
 -5 -9 2 1.89925 0.81827 7
 -5 -9 2 -0.493 1.1117 24
 -5 -9 2 1.80535 0.84835 7
 -5 -9 2 2.55966 0.71947 13
 -5 -9 2 1.95232 1.21623 31
 4 9 -2 -0.9488 0.54765 11
 4 9 -2 -0.5584 0.58489 7
 4 9 -2 0.75751 0.85691 7
 4 9 -2 -0.3144 1.03868 32
 4 9 -2 0.41738 0.82121 24
 4 9 -2 -0.1198 0.9559 30
 4 9 -2 0.74041 0.59142 12
 4 9 -2 0.22008 0.55733 2
 4 9 -2 0.71255 0.8013 26
 4 9 -2 0.08255 0.58777 5
 4 9 -2 -0.4803 0.73728 17
 -4 -9 2 0.63003 1.01124 31
 -4 -9 2 1.53635 0.63161 9
 -4 -9 2 0.3431 0.67333 13
 -4 -9 2 -0.2272 0.49746 2
 -4 -9 2 0.79761 0.76077 10
 -4 -9 2 0.0976 0.64751 7
 -4 -9 2 0.23901 0.57342 4
 -4 -9 2 0.64726 1.00086 24
 -4 -9 2 0.26526 0.75788 7
 3 9 -2 23.1138 1.38628 7
 3 9 -2 28.074 1.32077 4
 3 9 -2 25.542 1.65929 7
 3 9 -2 27.1538 1.40945 17
 3 9 -2 26.8588 1.38093 26
 3 9 -2 25.7841 1.97023 32
 3 9 -2 27.5042 1.9794 30
 3 9 -2 31.4816 1.59869 11
 3 9 -2 27.58 1.23984 12
 3 9 -2 28.765 1.69548 24
 -3 -9 2 27.6703 1.90364 24
 -3 -9 2 26.2839 1.55457 7
 -3 -9 2 28.6322 1.97359 31
 -3 -9 2 27.9648 1.452 9
 -3 -9 2 28.3755 1.59461 7
 -3 -9 2 28.1545 1.30969 2
 -3 -9 2 26.8967 1.55579 10
 -3 -9 2 27.7014 1.26593 23
 -3 -9 2 28.9444 1.3526 4
 2 9 -2 36.8845 1.31391 12
 2 9 -2 36.4105 1.50663 26
 2 9 -2 37.1716 1.75061 7
 2 9 -2 36.999 2.09815 32
 2 9 -2 36.1323 1.99091 30
 2 9 -2 37.9379 1.56253 7
 2 9 -2 34.6689 1.41436 4
 2 9 -2 35.1189 1.75762 24
 2 9 -2 37.029 1.66754 11
 -2 -9 2 34.4689 2.06314 31
 -2 -9 2 37.7664 1.38981 23
 -2 -9 2 35.7472 1.59661 10
 -2 -9 2 35.3098 1.47739 4
 -2 -9 2 38.0452 1.97999 24
 -2 -9 2 39.7779 1.57499 9
 -2 -9 2 36.0107 1.66268 7
 -2 -9 2 36.3021 1.46824 2
 -2 -9 2 36.637 1.68477 7
 1 9 -2 -0.7126 0.4651 7
 1 9 -2 0.31237 0.36861 4
 1 9 -2 0.30663 0.53641 11
 1 9 -2 0.60091 0.47895 12
 1 9 -2 0.10052 0.57263 24
 1 9 -2 0.90701 0.63379 7
 1 9 -2 0.38907 0.82216 30
 1 9 -2 0.35151 0.41859 8
 -1 -9 2 0.22332 0.53684 10
 -1 -9 2 1.22627 0.57263 7
 -1 -9 2 0.86772 0.41675 2
 -1 -9 2 0.50802 0.54901 7
 -1 -9 2 0.29143 0.41631 4
 -1 -9 2 0.42125 0.43043 12
 -1 -9 2 -0.0257 0.47631 9
 -1 -9 2 0.77927 0.78602 31
 -1 -9 2 0.69688 0.39834 14
 0 9 -2 15.6505 1.4274 24
 0 9 -2 19.1794 1.54046 30
 0 9 -2 16.9863 1.02784 12
 0 9 -2 15.5405 1.22571 7
 0 9 -2 16.9714 1.10633 7
 0 9 -2 16.2521 0.84993 8
 0 9 -2 18.8398 1.22717 22
 0 9 -2 17.6548 0.93728 4
 0 -9 2 15.2986 1.46668 31
 0 -9 2 17.6526 1.15876 10
 0 -9 2 16.8347 1.2038 7
 0 -9 2 17.5808 1.17553 7
 0 -9 2 17.5086 1.03184 4
 0 -9 2 17.1917 0.99325 2
 0 -9 2 16.8989 0.93931 12
 -1 9 -2 0.69107 0.45892 7
 -1 9 -2 0.30184 0.35777 4
 -1 9 -2 0.53606 0.48791 12
 -1 9 -2 -0.8954 0.42694 10
 -1 9 -2 0.77753 0.74209 30
 -1 9 -2 -0.3999 0.5997 24
 -1 9 -2 -1.0768 0.54541 7
 -1 9 -2 0.47921 0.38926 8
 -1 9 -2 0.34739 0.52769 22
 1 -9 2 0.31378 0.5582 7
 1 -9 2 -0.153 0.41165 12
 1 -9 2 0.70984 0.43673 4
 1 -9 2 0.39597 0.36531 3
 1 -9 2 0.17083 0.39328 2
 1 -9 2 0.57247 0.8158 31
 1 -9 2 -0.3481 0.52834 10
 1 -9 2 0.03606 0.52986 7
 1 -9 2 0.29645 0.42152 17
 -2 9 -2 71.3797 1.88367 8
 -2 9 -2 75.2296 2.37634 7
 -2 9 -2 72.7055 1.78617 25
 -2 9 -2 76.7435 2.53151 24
 -2 9 -2 72.3652 2.61315 30
 -2 9 -2 75.0845 2.21984 10
 -2 9 -2 72.5529 1.989 22
 -2 9 -2 68.8983 2.14536 4
 -2 9 -2 74.8996 2.3392 7
 2 -9 2 73.5115 2.04744 12
 2 -9 2 70.8518 2.35135 2
 2 -9 2 73.6623 2.28037 10
 2 -9 2 77.0169 2.36734 7
 2 -9 2 72.6799 2.68146 31
 2 -9 2 75.6068 2.09485 3
 2 -9 2 73.1573 2.31871 7
 -3 9 -2 92.4126 2.62945 10
 -3 9 -2 92.814 2.40382 16
 -3 9 -2 93.6926 2.75603 7
 -3 9 -2 92.5849 2.74849 7
 -3 9 -2 94.0342 2.60875 4
 -3 9 -2 90.8664 2.29484 8
 -3 9 -2 90.7318 3.08419 30
 -3 9 -2 93.0725 2.40573 5
 -3 9 -2 91.9105 2.18707 25
 -3 9 -2 83.2181 2.87044 24
 3 -9 2 91.9919 2.26393 8
 3 -9 2 92.3185 3.11911 31
 3 -9 2 90.6206 3.07991 32
 3 -9 2 91.1583 2.47641 28
 3 -9 2 94.7295 2.44695 12
 3 -9 2 82.1305 2.68716 7
 3 -9 2 92.434 2.7356 7
 3 -9 2 90.5755 2.77922 2
 3 -9 2 96.4902 2.53462 3
 3 -9 2 89.9623 2.68175 10
 -4 9 -2 145.093 3.83356 10
 -4 9 -2 144.337 3.63773 5
 -4 9 -2 154.483 3.99259 7
 -4 9 -2 151.738 3.87132 4
 -4 9 -2 147.992 3.33583 25
 -4 9 -2 149.875 3.44344 8
 -4 9 -2 147.685 3.39369 16
 -4 9 -2 149.444 3.98642 7
 4 -9 2 148.585 3.97167 7
 4 -9 2 145.441 3.75269 3
 4 -9 2 147.514 3.55181 12
 4 -9 2 153.212 3.42276 8
 4 -9 2 153.027 3.97014 7
 4 -9 2 144.235 3.90371 10
 4 -9 2 145.364 4.27252 32
 4 -9 2 143.286 4.33871 31
 -5 9 -2 38.1421 1.4848 3
 -5 9 -2 34.8448 1.57211 25
 -5 9 -2 36.927 1.75488 7
 -5 9 -2 36.3859 1.66176 10
 -5 9 -2 36.1446 1.66968 7
 -5 9 -2 36.7285 1.34757 5
 -5 9 -2 35.6631 1.36998 16
 -5 9 -2 35.8124 1.48568 8
 -5 9 -2 34.6977 1.51265 4
 5 -9 2 38.2383 2.15353 32
 5 -9 2 36.1305 1.72605 7
 5 -9 2 38.4883 1.8165 10
 5 -9 2 33.1938 2.07111 31
 5 -9 2 36.3521 1.29648 22
 5 -9 2 36.974 1.42951 8
 5 -9 2 38.5058 1.78413 7
 5 -9 2 36.6078 1.53125 12
 5 -9 2 34.3877 1.47734 3
 5 -9 2 35.6327 1.63216 13
 -6 9 -2 0.0179 0.5161 4
 -6 9 -2 0.82646 0.65276 7
 -6 9 -2 0.97911 0.88459 25
 -6 9 -2 0.91488 0.5376 3
 -6 9 -2 0.71924 0.84379 7
 -6 9 -2 0.87635 0.64925 10
 -6 9 -2 0.14399 0.693 11
 -6 9 -2 0.94853 0.54753 5
 6 -9 2 0.13846 0.73421 13
 6 -9 2 1.00058 0.60389 3
 6 -9 2 1.678 0.78413 7
 6 -9 2 1.34665 0.58448 22
 6 -9 2 -0.5583 0.99592 32
 6 -9 2 0.23206 0.75879 7
 6 -9 2 0.30923 0.59104 8
 6 -9 2 1.44465 0.56246 12
 6 -9 2 -0.7323 0.74282 19
 -7 9 -2 1.88518 0.72708 10
 -7 9 -2 2.96411 0.76222 7
 -7 9 -2 0.72303 0.62982 4
 -7 9 -2 1.53882 0.70031 3
 -7 9 -2 0.73066 0.80707 11
 -7 9 -2 0.43941 1.02623 7
 -7 9 -2 1.72757 0.70843 5
 7 -9 2 2.253 0.80586 8
 7 -9 2 0.90735 0.86667 7
 7 -9 2 1.38188 0.70319 22
 7 -9 2 0.51148 0.63382 12
 7 -9 2 1.17915 0.81435 7
 7 -9 2 0.97136 1.23771 32
 7 -9 2 1.61724 0.73948 3
 7 -9 2 0.79584 0.75311 19
 7 -9 2 1.02851 0.84483 13
 -8 9 -2 -0.2887 0.94853 11
 -8 9 -2 0.37002 0.81906 5
 -8 9 -2 1.36294 0.83959 10
 -8 9 -2 -0.4355 1.20054 7
 -8 9 -2 -0.3803 1.1719 21
 -8 9 -2 -1.4784 0.75405 3
 -8 9 -2 -0.2215 0.7406 4
 -8 9 -2 1.64863 0.90949 7
 8 -9 2 -0.4305 0.73233 12
 8 -9 2 2.25712 1.23096 7
 8 -9 2 -0.2362 0.83553 3
 8 -9 2 0.43539 1.25076 32
 8 -9 2 -0.1926 0.87317 8
 8 -9 2 0.27058 1.05138 13
 8 -9 2 -0.8665 0.86843 22
 8 -9 2 0.49201 1.21072 33
 8 -9 2 0.52617 0.93885 7
 7 8 -2 8.51832 1.56003 7
 7 8 -2 3.32934 0.9903 11
 7 8 -2 9.71385 1.55866 17
 7 8 -2 7.5057 1.06863 12
 7 8 -2 6.47184 0.94003 2
 7 8 -2 8.67785 1.81032 32
 7 8 -2 8.27234 1.07528 7
 7 8 -2 7.81578 1.63188 30
 7 8 -2 7.16168 1.69029 24
 -7 -8 2 4.92015 0.95547 13
 -7 -8 2 6.97571 1.5859 31
 -7 -8 2 5.95678 1.04742 20
 -7 -8 2 5.44289 1.09775 18
 -7 -8 2 7.80114 1.3604 7
 -7 -8 2 5.66785 1.18139 9
 -7 -8 2 5.77413 0.98358 4
 -7 -8 2 7.83601 1.62374 24
 -7 -8 2 5.42481 1.12295 7
 6 8 -2 24.7905 2.13883 17
 6 8 -2 21.4715 1.48985 5
 6 8 -2 24.3158 2.11189 7
 6 8 -2 22.0524 2.2625 24
 6 8 -2 22.3786 1.44096 2
 6 8 -2 23.6549 2.21555 30
 6 8 -2 23.8378 1.51332 7
 6 8 -2 23.4678 1.64816 11
 6 8 -2 21.8505 2.35988 32
 6 8 -2 24.6304 1.52571 12
 -6 -8 2 21.9659 1.78791 9
 -6 -8 2 26.7671 2.4628 24
 -6 -8 2 22.7983 2.18203 31
 -6 -8 2 20.2337 1.65009 13
 -6 -8 2 23.5393 1.58046 4
 -6 -8 2 21.5572 1.67641 18
 -6 -8 2 22.3707 1.27376 20
 -6 -8 2 23.1161 1.91849 7
 -6 -8 2 24.3832 1.72466 7
 5 8 -2 4.99556 1.00205 7
 5 8 -2 4.47589 0.75384 11
 5 8 -2 4.35501 0.70134 12
 5 8 -2 3.15248 1.2168 32
 5 8 -2 4.35492 0.9887 17
 5 8 -2 4.43473 0.73471 7
 5 8 -2 5.59151 1.00414 24
 5 8 -2 3.84369 0.66293 2
 5 8 -2 3.4716 1.2185 30
 5 8 -2 4.99778 0.73159 5
 -5 -8 2 3.89844 0.70182 4
 -5 -8 2 4.61817 1.2191 31
 -5 -8 2 4.16612 1.07535 24
 -5 -8 2 4.01004 0.69715 7
 -5 -8 2 4.23707 0.81075 9
 -5 -8 2 3.45735 0.88788 7
 -5 -8 2 4.04156 0.62165 2
 -5 -8 2 3.80325 0.75791 13
 4 8 -2 -0.1551 0.49996 7
 4 8 -2 0.40243 0.70715 17
 4 8 -2 0.75371 0.67846 26
 4 8 -2 0.55776 0.50246 5
 4 8 -2 -0.5284 0.55347 11
 4 8 -2 0.49619 0.703 7
 4 8 -2 1.03529 0.71258 24
 4 8 -2 0.15533 0.86419 32
 4 8 -2 0.1609 0.52787 12
 4 8 -2 1.22212 1.0196 30
 4 8 -2 0.78823 0.53118 2
 -4 -8 2 -0.319 0.87355 31
 -4 -8 2 0.21817 0.52718 7
 -4 -8 2 0.59164 0.51891 4
 -4 -8 2 0.71432 0.85741 24
 -4 -8 2 0.74189 0.56458 9
 -4 -8 2 0.34188 0.45605 2
 -4 -8 2 0.12234 0.65244 7
 3 8 -2 0.37878 0.42671 4
 3 8 -2 0.67078 0.61646 24
 3 8 -2 0.33972 0.8504 30
 3 8 -2 1.57369 0.65229 7
 3 8 -2 0.66649 0.51673 11
 3 8 -2 -0.3269 0.57403 17
 3 8 -2 -0.3214 0.84358 32
 3 8 -2 0.61775 0.49332 2
 3 8 -2 0.80583 0.46859 12
 3 8 -2 0.60299 0.49468 7
 3 8 -2 0.7438 0.63493 26
 -3 -8 2 1.06099 0.39967 2
 -3 -8 2 1.11838 0.54732 7
 -3 -8 2 1.66641 0.54275 23
 -3 -8 2 0.4987 0.45429 4
 -3 -8 2 0.23009 0.79137 24
 -3 -8 2 0.58622 0.56328 10
 -3 -8 2 -0.0297 0.44617 9
 -3 -8 2 0.23661 0.55602 7
 -3 -8 2 0.38299 0.84998 31
 2 8 -2 32.9167 1.50884 7
 2 8 -2 31.755 1.78565 30
 2 8 -2 28.5404 1.5328 24
 2 8 -2 34.452 1.39617 7
 2 8 -2 31.612 1.49218 11
 2 8 -2 32.6768 1.16445 12
 2 8 -2 32.4094 1.30667 26
 2 8 -2 35.2463 1.26173 17
 2 8 -2 34.869 1.28573 4
 2 8 -2 30.0397 1.82289 32
 -2 -8 2 31.3263 1.28552 2
 -2 -8 2 32.0117 1.4181 9
 -2 -8 2 33.0741 1.42584 10
 -2 -8 2 31.5899 1.23555 23
 -2 -8 2 32.6736 1.48633 7
 -2 -8 2 34.1542 1.49454 7
 -2 -8 2 33.3269 1.29441 4
 -2 -8 2 34.7674 1.85541 31
 -2 -8 2 33.0781 1.75312 24
 1 8 -2 31.0006 1.03828 8
 1 8 -2 32.4846 1.54153 24
 1 8 -2 33.6569 1.33627 7
 1 8 -2 33.3563 1.20613 4
 1 8 -2 33.3866 1.12954 12
 1 8 -2 31.1774 1.40748 11
 1 8 -2 29.9585 1.64185 30
 1 8 -2 33.1531 1.43375 7
 -1 -8 2 31.8774 1.67274 31
 -1 -8 2 31.8549 1.38726 7
 -1 -8 2 33.4423 1.28078 2
 -1 -8 2 32.059 1.35059 10
 -1 -8 2 30.7501 1.07894 12
 -1 -8 2 31.5387 1.40994 7
 -1 -8 2 31.4267 1.24555 4
 0 8 -2 20.0653 1.11512 22
 0 8 -2 19.6103 0.93626 12
 0 8 -2 20.0335 1.32922 24
 0 8 -2 21.1277 1.05212 7
 0 8 -2 21.0102 1.40491 30
 0 8 -2 19.6745 0.79514 8
 0 8 -2 19.3178 0.91559 4
 0 8 -2 17.8471 1.12548 7
 0 -8 2 19.2554 1.10166 10
 0 -8 2 20.0079 1.13336 7
 0 -8 2 20.4932 0.98574 2
 0 -8 2 19.1089 0.88492 12
 0 -8 2 20.5725 1.44528 31
 0 -8 2 19.8026 1.11723 7
 0 -8 2 19.3229 0.98211 4
 0 -8 2 18.4449 0.86547 17
 -1 8 -2 -0.8229 0.45721 7
 -1 8 -2 0.09241 0.44383 22
 -1 8 -2 -0.3455 0.40263 12
 -1 8 -2 0.01736 0.2995 8
 -1 8 -2 0.01076 0.44971 7
 -1 8 -2 -0.5461 0.55893 24
 -1 8 -2 0.24119 0.64974 30
 -1 8 -2 -0.1768 0.28251 4
 -1 8 -2 0.19349 0.44271 25
 -1 8 -2 0.13205 0.37638 10
 1 -8 2 0.64261 0.45972 7
 1 -8 2 0.064 0.34039 4
 1 -8 2 0.09817 0.45377 10
 1 -8 2 -0.1731 0.36457 17
 1 -8 2 0.05545 0.41919 7
 1 -8 2 -0.3333 0.6358 31
 1 -8 2 0.47617 0.38112 12
 1 -8 2 -0.0067 0.32038 3
 1 -8 2 0.31196 0.36184 2
 -2 8 -2 6.30615 0.75922 24
 -2 8 -2 7.73643 0.74075 7
 -2 8 -2 6.13879 0.9222 30
 -2 8 -2 5.53618 0.59892 10
 -2 8 -2 6.1651 0.62849 7
 -2 8 -2 6.86245 0.68295 8
 -2 8 -2 7.11319 0.56958 25
 -2 8 -2 6.57478 0.58422 22
 -2 8 -2 7.0736 0.6889 4
 2 -8 2 6.58585 0.62171 8
 2 -8 2 7.0878 0.69578 7
 2 -8 2 6.06818 0.56813 12
 2 -8 2 6.93038 1.0394 32
 2 -8 2 7.46112 0.70125 3
 2 -8 2 5.71972 0.70051 2
 2 -8 2 7.1117 0.72077 10
 2 -8 2 7.92159 0.94799 31
 2 -8 2 6.06021 0.62942 7
 -3 8 -2 155.753 4.00423 7
 -3 8 -2 154.919 4.21268 30
 -3 8 -2 159.226 4.10663 24
 -3 8 -2 160.217 3.37163 25
 -3 8 -2 154.926 3.72002 5
 -3 8 -2 157.663 3.48061 16
 -3 8 -2 154.975 3.87432 10
 -3 8 -2 155.769 3.44568 8
 -3 8 -2 153.833 3.97935 7
 -3 8 -2 157.414 3.91752 4
 3 -8 2 154.348 3.9848 7
 3 -8 2 153.315 4.20523 32
 3 -8 2 155.742 3.73556 28
 3 -8 2 159.885 3.83369 3
 3 -8 2 155.376 3.92518 10
 3 -8 2 153.085 4.24227 31
 3 -8 2 156.722 3.41955 8
 3 -8 2 152.46 3.98897 7
 3 -8 2 151.998 3.54534 12
 -4 8 -2 257.88 6.00308 10
 -4 8 -2 255.527 5.29369 16
 -4 8 -2 255.963 5.32934 25
 -4 8 -2 253.703 5.4183 8
 -4 8 -2 254.819 5.90241 5
 -4 8 -2 260.717 5.97787 3
 -4 8 -2 249.06 6.06331 4
 -4 8 -2 258.591 6.15477 7
 -4 8 -2 256.422 6.17527 7
 4 -8 2 258.991 5.39975 8
 4 -8 2 248.79 5.36054 22
 4 -8 2 253.746 5.50337 12
 4 -8 2 252.204 6.28136 32
 4 -8 2 254.993 5.994 3
 4 -8 2 250.668 6.40449 31
 4 -8 2 254.495 6.14821 7
 4 -8 2 251.901 5.68671 13
 4 -8 2 256.141 6.17026 7
 4 -8 2 248.774 6.02788 10
 -5 8 -2 10.7482 1.05731 10
 -5 8 -2 14.3795 0.9624 3
 -5 8 -2 14.9452 1.23028 25
 -5 8 -2 14.7182 1.16822 7
 -5 8 -2 13.6897 0.96503 16
 -5 8 -2 12.6605 0.88074 5
 -5 8 -2 12.0154 1.25157 7
 -5 8 -2 12.9181 0.95246 4
 5 -8 2 14.1377 1.20853 7
 5 -8 2 13.2477 1.29206 10
 5 -8 2 14.1377 0.98694 8
 5 -8 2 15.555 1.20497 7
 5 -8 2 10.8144 0.97171 3
 5 -8 2 12.2027 0.90064 22
 5 -8 2 14.1082 1.04059 12
 5 -8 2 13.8342 1.39286 32
 5 -8 2 12.963 1.17621 13
 -6 8 -2 -0.2368 0.61674 11
 -6 8 -2 -0.3742 0.45142 4
 -6 8 -2 0.71001 0.55049 7
 -6 8 -2 0.48761 0.52564 10
 -6 8 -2 0.26156 0.50152 3
 -6 8 -2 -0.3718 0.65241 7
 -6 8 -2 0.4451 0.52369 5
 6 -8 2 -0.4274 0.50983 3
 6 -8 2 -0.6799 0.55392 22
 6 -8 2 1.18961 0.69079 33
 6 -8 2 0.59968 0.52146 8
 6 -8 2 -0.594 0.57764 19
 6 -8 2 0.47292 0.68244 13
 6 -8 2 0.88703 0.51897 12
 6 -8 2 0.42825 0.63908 7
 6 -8 2 0.10898 0.59156 7
 6 -8 2 1.05839 1.06485 32
 -7 8 -2 0.67181 0.58452 10
 -7 8 -2 0.42174 0.53381 4
 -7 8 -2 1.61145 0.74627 11
 -7 8 -2 1.10742 0.89859 7
 -7 8 -2 -0.3386 0.58835 5
 -7 8 -2 0.61777 0.54984 3
 -7 8 -2 1.15221 0.61006 7
 7 -8 2 0.09319 0.76173 7
 7 -8 2 1.57765 0.62781 12
 7 -8 2 0.72143 0.62427 8
 7 -8 2 -0.2409 0.75653 7
 7 -8 2 0.64596 0.6045 19
 7 -8 2 0.14781 0.7187 22
 7 -8 2 0.96712 1.19891 32
 7 -8 2 0.26648 0.93329 33
 7 -8 2 0.95518 0.66134 3
 7 -8 2 -0.3177 0.74617 13
 -8 8 -2 -0.311 0.67561 3
 -8 8 -2 1.13262 1.1645 7
 -8 8 -2 -1.5497 0.74838 5
 -8 8 -2 0.76131 0.71443 10
 -8 8 -2 0.11005 0.718 4
 -8 8 -2 0.75826 0.80002 7
 -8 8 -2 0.68027 0.99469 21
 -8 8 -2 0.63624 0.86453 11
 8 -8 2 -0.196 0.74476 8
 8 -8 2 -0.4542 1.19906 33
 8 -8 2 -0.0706 0.95986 7
 8 -8 2 -0.541 1.27145 32
 8 -8 2 0.58684 0.79981 3
 8 -8 2 0.8119 0.68117 12
 8 -8 2 -0.4535 0.94671 13
 8 -8 2 -0.1299 0.97349 7
 8 -8 2 0.14655 0.95971 9
 -9 8 -2 3.0112 1.42881 7
 -9 8 -2 -1.6811 0.99162 7
 -9 8 -2 1.59514 1.10089 11
 -9 8 -2 0.47574 0.9867 5
 -9 8 -2 1.26558 1.01932 4
 -9 8 -2 0.73124 1.21506 21
 -9 8 -2 -0.1467 0.82328 3
 9 -8 2 1.08793 1.55179 33
 9 -8 2 1.73098 1.23368 7
 9 -8 2 1.94919 1.23983 7
 9 -8 2 -1.3079 0.95443 8
 9 -8 2 1.95481 1.48229 32
 9 -8 2 0.07071 1.23684 13
 9 -8 2 2.81386 1.19209 9
 7 7 -2 10.8485 1.1197 7
 7 7 -2 8.65557 1.08273 11
 7 7 -2 9.24848 1.64093 30
 7 7 -2 7.6543 0.88161 2
 7 7 -2 9.71348 1.46667 24
 7 7 -2 6.04349 1.57337 32
 7 7 -2 8.30688 0.99002 12
 7 7 -2 8.32186 0.9049 5
 7 7 -2 9.89963 1.47173 7
 -7 -7 2 9.51499 0.99271 18
 -7 -7 2 9.29788 1.58378 24
 -7 -7 2 10.1332 1.18936 9
 -7 -7 2 8.34979 1.07598 7
 -7 -7 2 10.8769 1.03682 4
 -7 -7 2 12.107 1.30705 7
 -7 -7 2 12.0938 1.19846 13
 -7 -7 2 8.12242 1.56564 31
 -7 -7 2 10.238 1.0609 20
 6 7 -2 26.4533 2.14424 30
 6 7 -2 24.2003 1.52121 11
 6 7 -2 27.6974 2.26307 32
 6 7 -2 28.6623 2.16026 24
 6 7 -2 27.3055 1.40985 12
 6 7 -2 27.2085 1.9641 7
 6 7 -2 24.2838 1.38161 2
 6 7 -2 25.4343 1.41902 5
 6 7 -2 26.5575 1.46651 7
 -6 -7 2 26.4789 1.6031 13
 -6 -7 2 28.5371 1.80967 7
 -6 -7 2 25.7897 2.15654 24
 -6 -7 2 25.1059 1.54334 18
 -6 -7 2 26.3851 1.48645 4
 -6 -7 2 24.8716 1.36312 20
 -6 -7 2 26.4314 1.66015 9
 -6 -7 2 28.5225 1.67786 7
 -6 -7 2 23.9261 2.1601 31
 5 7 -2 0.93354 0.49971 5
 5 7 -2 0.54367 0.78234 7
 5 7 -2 0.82496 0.55059 7
 5 7 -2 0.03673 0.489 2
 5 7 -2 0.79185 0.55388 12
 5 7 -2 0.33763 0.75142 24
 5 7 -2 0.61009 0.90617 32
 5 7 -2 0.4925 0.55249 11
 5 7 -2 1.67329 0.83966 17
 5 7 -2 0.90037 0.95661 30
 -5 -7 2 0.57116 0.6997 7
 -5 -7 2 1.04735 0.52835 4
 -5 -7 2 1.72042 0.52419 20
 -5 -7 2 1.15178 0.43102 2
 -5 -7 2 0.76819 0.61274 13
 -5 -7 2 0.84301 0.58565 7
 -5 -7 2 1.59139 0.6266 9
 -5 -7 2 0.58185 0.90637 31
 -5 -7 2 0.87589 0.89949 24
 4 7 -2 2.63494 0.74968 24
 4 7 -2 2.7096 0.96482 30
 4 7 -2 2.85076 0.58592 7
 4 7 -2 3.36673 0.93177 32
 4 7 -2 3.2745 0.61737 11
 4 7 -2 3.32094 0.75867 17
 4 7 -2 4.15004 0.67705 26
 4 7 -2 3.54356 0.51385 12
 4 7 -2 4.19738 0.7499 7
 4 7 -2 3.14195 0.52212 2
 4 7 -2 3.31944 0.58143 5
 -4 -7 2 3.06235 0.48569 2
 -4 -7 2 3.30991 0.73224 7
 -4 -7 2 3.66087 0.40281 20
 -4 -7 2 4.26567 0.63644 7
 -4 -7 2 3.07143 0.92701 31
 -4 -7 2 3.54428 0.6346 9
 -4 -7 2 2.86608 0.53324 4
 -4 -7 2 3.14507 0.8246 24
 3 7 -2 31.839 1.18124 26
 3 7 -2 31.49 1.32239 17
 3 7 -2 30.8948 1.69002 30
 3 7 -2 33.3831 1.48443 7
 3 7 -2 30.517 1.08589 12
 3 7 -2 31.7316 1.27189 2
 3 7 -2 32.938 1.33684 7
 3 7 -2 31.1348 1.74898 32
 3 7 -2 30.2918 1.50731 24
 3 7 -2 32.2395 1.42366 11
 -3 -7 2 30.5578 1.70729 31
 -3 -7 2 30.83 1.39724 7
 -3 -7 2 31.6293 1.34688 9
 -3 -7 2 29.8231 1.3316 7
 -3 -7 2 30.4227 1.2126 4
 -3 -7 2 30.6171 1.6548 24
 -3 -7 2 30.6136 1.18821 23
 -3 -7 2 30.229 1.19035 2
 2 7 -2 98.7457 2.97644 30
 2 7 -2 101.346 2.72785 7
 2 7 -2 99.5952 3.02603 32
 2 7 -2 101.529 2.37134 26
 2 7 -2 102.003 2.77658 7
 2 7 -2 99.0299 2.83609 24
 2 7 -2 99.3766 2.59464 4
 2 7 -2 99.2287 2.81357 11
 2 7 -2 98.5136 2.26938 12
 2 7 -2 102.764 2.44751 17
 -2 -7 2 101.421 2.67542 9
 -2 -7 2 102.915 2.78099 2
 -2 -7 2 96.9104 2.60089 4
 -2 -7 2 97.1706 2.41159 23
 -2 -7 2 97.6597 2.89685 24
 -2 -7 2 100.138 2.76857 7
 -2 -7 2 100.215 3.02536 31
 -2 -7 2 100.093 2.65888 10
 1 7 -2 122.04 3.14795 7
 1 7 -2 115.998 3.2836 30
 1 7 -2 119.75 3.21545 24
 1 7 -2 121.152 2.64562 12
 1 7 -2 118.111 3.08742 7
 1 7 -2 119.033 3.16945 11
 1 7 -2 119.04 3.00188 4
 -1 -7 2 121.293 3.23244 2
 -1 -7 2 121.872 2.63553 12
 -1 -7 2 115.789 3.12638 7
 -1 -7 2 120.217 3.02112 10
 -1 -7 2 116.731 3.33312 31
 -1 -7 2 120.062 3.02124 4
 -1 -7 2 119.463 3.25661 24
 -1 -7 2 121.339 3.15668 7
 0 7 -2 172.007 4.35137 30
 0 7 -2 172.504 4.18903 7
 0 7 -2 173.879 4.23069 7
 0 7 -2 174.243 3.58931 8
 0 7 -2 173.979 4.13338 4
 0 7 -2 171.199 4.28398 24
 0 7 -2 171.762 3.8766 22
 0 7 -2 170.018 3.65544 12
 0 -7 2 169.976 3.6451 12
 0 -7 2 172.686 4.48171 2
 0 -7 2 172.064 4.14471 4
 0 -7 2 174.464 4.42646 31
 0 -7 2 166.741 3.72126 17
 0 -7 2 173.374 4.25129 7
 0 -7 2 173.804 4.10023 10
 0 -7 2 167.7 4.21741 7
 -1 7 -2 44.0959 1.16698 8
 -1 7 -2 45.3866 1.45616 10
 -1 7 -2 44.1737 1.66519 24
 -1 7 -2 45.4158 1.71753 30
 -1 7 -2 44.6412 1.3063 12
 -1 7 -2 42.9795 1.50525 7
 -1 7 -2 44.8817 1.40287 4
 -1 7 -2 46.6676 1.20402 25
 -1 7 -2 42.979 1.49876 7
 -1 7 -2 43.785 1.35459 22
 1 -7 2 41.8401 1.26009 17
 1 -7 2 45.3095 1.76878 31
 1 -7 2 43.2941 1.51851 7
 1 -7 2 44.7212 1.43554 4
 1 -7 2 43.6215 1.49756 7
 1 -7 2 44.7068 1.49602 10
 1 -7 2 45.0784 1.2779 12
 1 -7 2 42.9795 1.48676 2
 1 -7 2 43.0653 1.34375 3
 -2 7 -2 164.832 4.01664 7
 -2 7 -2 163.135 3.45368 8
 -2 7 -2 162.315 4.03126 7
 -2 7 -2 161.853 4.15627 30
 -2 7 -2 161.593 3.95502 4
 -2 7 -2 161.439 3.89681 10
 -2 7 -2 150.751 3.38272 25
 -2 7 -2 164.038 4.08244 24
 2 -7 2 164.783 3.55239 12
 2 -7 2 159.663 4.1334 32
 2 -7 2 162.064 3.44034 8
 2 -7 2 165.941 3.94727 10
 2 -7 2 160.934 3.87357 3
 2 -7 2 165.181 4.24025 31
 2 -7 2 161.307 4.0045 7
 2 -7 2 163.757 4.03196 7
 -3 7 -2 92.8975 2.35375 5
 -3 7 -2 94.4041 2.23586 8
 -3 7 -2 94.5977 2.5525 4
 -3 7 -2 94.0946 2.60502 7
 -3 7 -2 95.355 2.62947 7
 -3 7 -2 96.8706 2.26255 16
 -3 7 -2 97.624 2.57158 10
 -3 7 -2 98.1433 2.2348 25
 -3 7 -2 92.9611 2.78264 30
 3 -7 2 95.5396 2.84522 32
 3 -7 2 96.2479 2.63605 7
 3 -7 2 92.7516 2.84183 31
 3 -7 2 93.9644 2.60355 7
 3 -7 2 95.7016 2.4712 3
 3 -7 2 95.2588 2.30401 28
 3 -7 2 99.8788 2.22942 8
 3 -7 2 94.6814 2.23009 22
 3 -7 2 93.0756 2.32595 12
 3 -7 2 96.124 2.61809 10
 -4 7 -2 342.476 7.56977 10
 -4 7 -2 341.289 6.80879 25
 -4 7 -2 325.986 7.54289 5
 -4 7 -2 334.372 7.59998 3
 -4 7 -2 331.085 7.71729 7
 -4 7 -2 331.39 6.68348 16
 -4 7 -2 327.24 6.85035 8
 -4 7 -2 328.573 7.66268 4
 -4 7 -2 337.258 7.77013 7
 4 -7 2 333.45 7.73037 7
 4 -7 2 325.375 7.15244 13
 4 -7 2 320.926 6.85342 22
 4 -7 2 328.13 7.56808 10
 4 -7 2 324.819 7.71323 32
 4 -7 2 327.011 7.609 3
 4 -7 2 336.295 7.75277 7
 4 -7 2 328.169 7.9048 31
 4 -7 2 332.271 6.83867 8
 4 -7 2 336.068 6.92893 12
 -5 7 -2 31.4901 1.51947 7
 -5 7 -2 32.9538 1.42384 7
 -5 7 -2 30.3879 1.19741 3
 -5 7 -2 28.4661 1.28346 4
 -5 7 -2 32.5061 1.16116 5
 -5 7 -2 32.9353 1.40523 10
 5 -7 2 30.619 1.09423 33
 5 -7 2 28.6995 1.82912 32
 5 -7 2 31.1543 1.36876 13
 5 -7 2 32.7742 1.32506 12
 5 -7 2 33.5143 1.23059 8
 5 -7 2 33.3772 1.48004 7
 5 -7 2 30.2867 1.42762 7
 5 -7 2 29.4979 1.17309 22
 5 -7 2 29.7729 1.2621 3
 -6 7 -2 23.139 1.31034 7
 -6 7 -2 19.2908 1.4494 7
 -6 7 -2 21.4234 1.06878 3
 -6 7 -2 22.2883 1.22203 11
 -6 7 -2 22.0978 1.20197 4
 -6 7 -2 21.9428 1.1109 5
 -6 7 -2 20.097 1.26611 10
 6 -7 2 22.0004 1.29417 33
 6 -7 2 22.4192 1.13773 8
 6 -7 2 20.9842 1.37264 7
 6 -7 2 19.7845 1.7984 32
 6 -7 2 22.3187 1.06224 19
 6 -7 2 21.7514 1.44787 7
 6 -7 2 22.6949 1.20439 12
 6 -7 2 19.4339 1.33897 13
 6 -7 2 20.7403 1.19288 3
 -7 7 -2 1.06994 0.84698 7
 -7 7 -2 1.49708 0.55475 3
 -7 7 -2 0.00985 0.56424 10
 -7 7 -2 0.56352 0.56531 4
 -7 7 -2 1.52603 0.67969 11
 -7 7 -2 1.15615 0.61045 5
 -7 7 -2 1.11993 0.78541 21
 -7 7 -2 0.49361 0.64628 7
 7 -7 2 1.35223 0.75573 13
 7 -7 2 2.26034 0.81701 7
 7 -7 2 0.89274 0.58082 3
 7 -7 2 1.18815 0.57181 5
 7 -7 2 1.48625 0.60751 8
 7 -7 2 1.12832 1.06068 32
 7 -7 2 1.11858 0.51988 12
 7 -7 2 1.70366 0.79125 7
 -8 7 -2 0.19816 0.6942 5
 -8 7 -2 0.0949 1.01822 7
 -8 7 -2 0.13822 0.66146 10
 -8 7 -2 0.24186 0.89746 21
 -8 7 -2 -0.1971 0.70506 4
 -8 7 -2 0.46017 0.7952 11
 -8 7 -2 -0.5331 0.62483 3
 -8 7 -2 -0.0345 0.67786 7
 8 -7 2 1.85704 0.89659 13
 8 -7 2 -0.031 0.65901 3
 8 -7 2 -0.1714 1.1834 32
 8 -7 2 -1.2669 0.84185 7
 8 -7 2 -0.1636 0.81796 9
 8 -7 2 0.76666 0.61873 12
 8 -7 2 0.93058 0.79696 7
 8 -7 2 -0.0568 0.65571 5
 8 -7 2 0.62912 0.72621 8
 -9 7 -2 4.55973 1.3005 7
 -9 7 -2 7.1197 1.14478 11
 -9 7 -2 5.70381 1.1675 21
 -9 7 -2 7.46721 1.13726 7
 -9 7 -2 5.80063 1.01836 5
 -9 7 -2 4.61 0.91508 3
 -9 7 -2 5.2878 0.9047 10
 -9 7 -2 3.85595 1.02672 4
 9 -7 2 3.34074 0.76285 12
 9 -7 2 4.44644 1.19086 7
 9 -7 2 5.64187 1.23727 7
 9 -7 2 6.50051 1.00517 5
 9 -7 2 4.40304 1.24705 13
 9 -7 2 6.02158 1.60319 32
 9 -7 2 4.55437 1.0424 8
 9 -7 2 6.26197 1.21844 9
 8 6 -2 1.11925 1.20673 23
 8 6 -2 -0.5577 0.75309 2
 8 6 -2 0.82133 0.98943 11
 8 6 -2 0.22753 0.66462 5
 8 6 -2 0.12894 1.03971 8
 8 6 -2 -2.233 1.30901 7
 8 6 -2 1.6709 1.49602 32
 8 6 -2 1.40077 0.91156 7
 8 6 -2 1.85177 1.40796 30
 -8 -6 2 0.8146 1.1477 9
 -8 -6 2 -1.4407 0.95498 13
 -8 -6 2 -0.4065 1.48983 24
 -8 -6 2 0.71065 1.10069 7
 -8 -6 2 0.34504 0.84592 4
 -8 -6 2 -0.6118 0.88057 7
 -8 -6 2 -0.5331 1.30832 31
 7 6 -2 2.60986 0.66797 2
 7 6 -2 2.31571 1.10681 7
 7 6 -2 2.94266 0.63412 5
 7 6 -2 2.8231 1.19702 30
 7 6 -2 0.65995 1.17978 32
 7 6 -2 2.28819 0.794 11
 7 6 -2 2.70887 0.96979 23
 -7 -6 2 1.35891 0.7518 7
 -7 -6 2 1.80511 0.7189 4
 -7 -6 2 2.44946 0.84929 9
 -7 -6 2 1.87149 0.75619 18
 -7 -6 2 2.53049 0.95518 7
 -7 -6 2 3.63531 1.25688 24
 -7 -6 2 1.91119 1.19288 31
 -7 -6 2 2.20743 0.84347 13
 6 6 -2 15.7093 1.09426 2
 6 6 -2 14.9327 1.54431 32
 6 6 -2 19.4019 1.86386 30
 6 6 -2 16.8791 1.1269 5
 6 6 -2 19.0988 1.36716 11
 6 6 -2 19.4457 1.67771 24
 6 6 -2 18.2746 1.71319 7
 6 6 -2 16.3261 1.21612 7
 -6 -6 2 19.679 1.91418 24
 -6 -6 2 19.2087 1.38281 13
 -6 -6 2 18.8189 1.32193 7
 -6 -6 2 18.4633 1.88597 31
 -6 -6 2 17.5085 1.39768 9
 -6 -6 2 17.9753 1.25166 4
 -6 -6 2 18.5367 1.50865 7
 -6 -6 2 15.6824 1.25548 18
 5 6 -2 9.76876 0.90787 12
 5 6 -2 9.11469 0.89955 5
 5 6 -2 9.74845 0.96674 24
 5 6 -2 9.71296 0.96239 7
 5 6 -2 8.80283 1.04764 11
 5 6 -2 9.44387 0.87271 2
 5 6 -2 9.39407 1.01506 7
 5 6 -2 7.5364 1.15851 32
 5 6 -2 8.73106 1.11974 30
 -5 -6 2 8.7287 1.13626 31
 -5 -6 2 11.0823 1.08563 7
 -5 -6 2 10.4641 1.13619 13
 -5 -6 2 10.3743 0.95298 4
 -5 -6 2 8.31909 0.99358 24
 -5 -6 2 8.6987 0.78428 18
 -5 -6 2 9.13043 0.91142 7
 -5 -6 2 10.2776 1.08149 9
 4 6 -2 10.4709 1.10476 7
 4 6 -2 10.2115 0.86741 5
 4 6 -2 8.60872 0.77581 2
 4 6 -2 9.9949 0.85829 17
 4 6 -2 8.21499 1.0048 30
 4 6 -2 9.20605 0.75947 12
 4 6 -2 9.89702 0.89262 26
 4 6 -2 10.5552 1.05452 11
 4 6 -2 9.78688 1.11894 32
 4 6 -2 9.4385 0.91751 24
 4 6 -2 10.021 0.95544 7
 -4 -6 2 10.5499 0.92662 7
 -4 -6 2 10.0003 0.98578 9
 -4 -6 2 10.0312 0.69075 20
 -4 -6 2 10.3055 1.10272 7
 -4 -6 2 11.1168 1.07572 13
 -4 -6 2 7.98423 0.8865 24
 -4 -6 2 9.64413 0.84116 4
 -4 -6 2 9.18942 0.70982 2
 -4 -6 2 8.19502 1.02089 31
 3 6 -2 80.5356 2.33798 2
 3 6 -2 83.0249 2.44816 24
 3 6 -2 83.4183 2.64889 32
 3 6 -2 84.9325 2.20614 17
 3 6 -2 86.379 1.97984 26
 3 6 -2 86.038 2.31772 5
 3 6 -2 82.7826 1.93273 12
 3 6 -2 85.2721 2.42079 7
 3 6 -2 84.6088 2.43946 11
 3 6 -2 83.9899 2.58724 30
 3 6 -2 84.3497 2.33926 7
 -3 -6 2 79.7621 2.37191 7
 -3 -6 2 81.8748 2.07836 23
 -3 -6 2 82.44 2.29464 9
 -3 -6 2 80.6763 2.50765 24
 -3 -6 2 81.7779 2.61534 31
 -3 -6 2 83.1482 2.2298 4
 -3 -6 2 81.8226 2.31914 7
 -3 -6 2 83.5147 2.32122 2
 2 6 -2 30.3234 1.15963 7
 2 6 -2 31.1682 1.12443 2
 2 6 -2 30.2476 0.93201 12
 2 6 -2 31.3814 1.03473 26
 2 6 -2 29.0781 1.08603 17
 2 6 -2 30.431 1.35208 24
 2 6 -2 27.7252 1.38751 30
 2 6 -2 30.8766 1.26659 11
 2 6 -2 28.6973 1.48898 32
 2 6 -2 31.0991 1.25065 7
 2 6 -2 29.2165 1.03494 4
 -2 -6 2 29.2239 1.19008 9
 -2 -6 2 27.4235 1.41004 31
 -2 -6 2 28.5148 1.05576 23
 -2 -6 2 29.216 1.39781 24
 -2 -6 2 29.1776 1.06664 4
 -2 -6 2 30.1436 1.23437 7
 -2 -6 2 28.8654 1.0684 2
 -2 -6 2 28.6747 1.14967 7
 1 6 -2 56.7674 1.69948 7
 1 6 -2 57.505 1.52433 17
 1 6 -2 58.8818 1.7832 11
 1 6 -2 58.3788 1.94735 30
 1 6 -2 57.4193 1.8547 24
 1 6 -2 57.8169 1.62291 4
 1 6 -2 56.7691 1.41173 12
 1 6 -2 57.8401 1.74591 7
 -1 -6 2 57.8944 1.76181 7
 -1 -6 2 57.4583 1.73465 7
 -1 -6 2 58.5424 1.71756 2
 -1 -6 2 58.6374 1.64119 4
 -1 -6 2 56.1443 1.89017 24
 -1 -6 2 55.4736 1.93607 31
 -1 -6 2 57.8363 1.69014 10
 -1 -6 2 57.3075 1.39535 12
 0 6 -2 77.2795 2.10757 7
 0 6 -2 76.9619 2.27796 30
 0 6 -2 77.3673 1.80551 12
 0 6 -2 78.555 1.99756 22
 0 6 -2 78.6331 1.72907 8
 0 6 -2 77.3174 2.04815 4
 0 6 -2 80.271 2.27162 24
 0 6 -2 68.196 1.79861 25
 0 6 -2 80.4078 2.14549 7
 0 -6 2 78.6223 1.86899 17
 0 -6 2 78.9852 2.13659 7
 0 -6 2 78.3079 2.19252 2
 0 -6 2 76.6951 2.06692 4
 0 -6 2 76.4518 1.79066 12
 0 -6 2 78.9612 2.31746 31
 0 -6 2 76.2638 1.63338 6
 0 -6 2 78.7437 2.15464 7
 0 -6 2 80.1876 2.09955 10
 -1 6 -2 14.7253 0.6444 33
 -1 6 -2 14.1152 0.57625 8
 -1 6 -2 13.8372 0.68 25
 -1 6 -2 13.8055 0.9985 30
 -1 6 -2 16.4929 0.79613 22
 -1 6 -2 14.0868 0.79495 10
 -1 6 -2 13.7003 0.84161 7
 -1 6 -2 14.307 0.72586 4
 -1 6 -2 13.2965 1.01049 24
 -1 6 -2 14.4435 0.71855 12
 -1 6 -2 14.0853 0.84403 7
 1 -6 2 15.5359 0.88015 10
 1 -6 2 14.1563 0.68406 3
 1 -6 2 14.3882 0.6987 12
 1 -6 2 13.3423 0.77079 4
 1 -6 2 13.8942 0.82935 7
 1 -6 2 15.0575 0.75695 2
 1 -6 2 13.8835 1.04557 31
 1 -6 2 13.8522 0.83029 7
 -2 6 -2 98.8855 2.68673 24
 -2 6 -2 99.6464 2.18744 8
 -2 6 -2 98.4847 2.53102 10
 -2 6 -2 96.9658 2.56503 7
 -2 6 -2 94.262 2.1873 25
 -2 6 -2 97.3091 2.3661 5
 -2 6 -2 97.6902 2.53594 4
 -2 6 -2 99.0845 2.5971 7
 -2 6 -2 105.117 2.75848 30
 2 -6 2 101.811 2.75796 32
 2 -6 2 98.6772 2.5938 7
 2 -6 2 97.1246 2.56617 7
 2 -6 2 99.296 2.17766 8
 2 -6 2 98.1825 2.56073 10
 2 -6 2 97.8612 2.27899 12
 2 -6 2 97.9248 2.46802 3
 2 -6 2 98.5862 2.77022 31
 -3 6 -2 123.354 2.73634 25
 -3 6 -2 124.081 3.15215 7
 -3 6 -2 123.838 3.14054 7
 -3 6 -2 123.003 3.08859 4
 -3 6 -2 125.641 2.72166 16
 -3 6 -2 124.832 2.73651 8
 -3 6 -2 122.374 3.01597 3
 -3 6 -2 121.692 3.28056 30
 -3 6 -2 121.733 3.0754 10
 -3 6 -2 123.015 2.92627 5
 3 -6 2 119.66 2.73723 22
 3 -6 2 122.688 3.02628 3
 3 -6 2 121.498 2.7098 8
 3 -6 2 121.866 3.28933 32
 3 -6 2 123.975 3.34262 31
 3 -6 2 126.515 2.83253 12
 3 -6 2 123.078 3.11767 10
 3 -6 2 124.33 3.15437 7
 3 -6 2 124.016 3.13799 7
 -4 6 -2 31.3628 1.26051 7
 -4 6 -2 29.6722 1.27757 7
 -4 6 -2 30.7538 1.01445 16
 -4 6 -2 31.647 1.26203 10
 -4 6 -2 30.1628 1.07641 3
 -4 6 -2 29.938 0.99955 5
 -4 6 -2 29.7556 1.1497 4
 4 -6 2 30.2583 1.29282 7
 4 -6 2 31.2215 1.16035 12
 4 -6 2 29.695 1.03162 8
 4 -6 2 30.4607 1.50875 31
 4 -6 2 30.2734 1.04177 22
 4 -6 2 30.5746 0.89815 33
 4 -6 2 29.7744 1.26514 7
 4 -6 2 30.2026 1.53249 32
 4 -6 2 30.8639 1.32028 10
 4 -6 2 31.3156 1.20161 13
 4 -6 2 29.6631 1.11058 3
 -5 6 -2 38.8964 1.54013 7
 -5 6 -2 39.0971 1.49839 10
 -5 6 -2 38.928 1.3456 11
 -5 6 -2 36.7437 1.29171 3
 -5 6 -2 39.0777 1.40454 4
 -5 6 -2 38.0747 1.49093 7
 -5 6 -2 37.514 1.27013 5
 5 -6 2 39.9709 1.2633 5
 5 -6 2 39.7216 1.55138 7
 5 -6 2 36.5791 1.24478 19
 5 -6 2 36.71 1.37625 12
 5 -6 2 37.2765 1.37046 3
 5 -6 2 38.0236 1.8516 32
 5 -6 2 38.8907 1.44542 13
 5 -6 2 39.0304 1.28999 8
 5 -6 2 40.3742 1.54494 7
 -6 6 -2 5.64704 0.58528 5
 -6 6 -2 4.76389 0.54529 3
 -6 6 -2 5.50531 0.62552 4
 -6 6 -2 6.63727 0.83428 7
 -6 6 -2 4.70746 0.63442 7
 -6 6 -2 5.39633 0.70177 10
 -6 6 -2 6.21209 0.65437 11
 6 -6 2 4.98679 0.54102 5
 6 -6 2 6.0818 0.74971 7
 6 -6 2 4.90399 0.60675 3
 6 -6 2 5.02324 0.70063 13
 6 -6 2 6.66923 0.6774 8
 6 -6 2 5.45903 0.47112 19
 6 -6 2 4.83625 0.76937 7
 6 -6 2 4.1704 1.05641 32
 6 -6 2 4.00462 0.5524 12
 -7 6 -2 26.3721 1.37252 11
 -7 6 -2 25.5987 1.46641 10
 -7 6 -2 26.7532 1.47489 7
 -7 6 -2 24.4945 1.32972 4
 -7 6 -2 24.9373 1.31391 5
 -7 6 -2 28.3576 1.73679 7
 -7 6 -2 24.8773 1.20482 3
 -7 6 -2 26.7011 1.5268 21
 7 -6 2 25.1367 1.29465 8
 7 -6 2 28.1185 1.61148 7
 7 -6 2 26.1367 1.55453 13
 7 -6 2 24.491 1.31751 12
 7 -6 2 25.7693 1.48471 9
 7 -6 2 27.3663 2.0732 32
 7 -6 2 25.9722 1.54538 7
 7 -6 2 26.9237 1.29639 5
 7 -6 2 26.5635 1.38267 3
 -8 6 -2 10.9115 1.05575 21
 -8 6 -2 9.51501 0.99947 10
 -8 6 -2 11.2711 1.27671 5
 -8 6 -2 11.4573 1.36141 11
 -8 6 -2 11.4349 1.31629 4
 -8 6 -2 10.543 1.17423 7
 -8 6 -2 11.9417 1.12535 7
 -8 6 -2 9.22709 1.08206 3
 8 -6 2 9.25914 1.03988 7
 8 -6 2 11.1806 1.27383 5
 8 -6 2 10.9946 1.17165 12
 8 -6 2 11.6134 1.03725 9
 8 -6 2 10.83 1.51981 32
 8 -6 2 10.6696 1.15025 7
 8 -6 2 11.6484 1.21476 8
 8 -6 2 12.0465 1.15247 13
 -9 6 -2 1.69315 0.98752 21
 -9 6 -2 1.10242 0.89376 4
 -9 6 -2 2.16691 0.85199 10
 -9 6 -2 2.57539 1.00118 11
 -9 6 -2 2.18028 0.9743 7
 -9 6 -2 1.87223 1.19713 7
 -9 6 -2 0.99006 0.73533 3
 9 -6 2 0.35967 0.6662 12
 9 -6 2 1.1277 0.87433 5
 9 -6 2 1.84275 0.97617 7
 9 -6 2 -0.606 1.12719 7
 9 -6 2 2.44824 1.43376 32
 9 -6 2 2.82518 1.03296 9
 9 -6 2 1.12408 0.79417 8
 9 -6 2 3.49931 1.16037 13
 8 5 -2 0.71214 0.90703 11
 8 5 -2 0.85509 0.75076 7
 8 5 -2 2.65277 0.98419 8
 8 5 -2 0.39833 1.33343 32
 8 5 -2 0.96241 1.08571 23
 8 5 -2 1.4917 1.23777 30
 8 5 -2 0.08911 0.69332 2
 8 5 -2 0.50286 0.60044 5
 8 5 -2 0.32846 1.1912 7
 8 5 -2 1.10943 0.62807 1
 -8 -5 2 0.05327 1.19368 31
 -8 -5 2 0.2062 0.97378 13
 -8 -5 2 0.86751 0.98249 7
 -8 -5 2 0.84369 0.93407 9
 -8 -5 2 1.23654 0.79131 4
 -8 -5 2 -0.6419 1.30974 24
 -8 -5 2 -1.29 0.85595 7
 7 5 -2 3.82047 0.98317 7
 7 5 -2 2.48393 1.19517 30
 7 5 -2 3.3417 0.64235 2
 7 5 -2 3.93372 0.77755 11
 7 5 -2 3.10638 0.57689 5
 7 5 -2 2.03063 1.27271 32
 7 5 -2 1.56738 0.90282 23
 7 5 -2 5.25946 0.80094 7
 7 5 -2 4.02745 0.81164 8
 -7 -5 2 1.611 0.76765 13
 -7 -5 2 2.46416 0.68438 7
 -7 -5 2 3.07544 1.11671 24
 -7 -5 2 3.80478 0.73373 18
 -7 -5 2 2.85555 1.1418 31
 -7 -5 2 2.88133 0.87669 11
 -7 -5 2 3.56424 0.69771 4
 -7 -5 2 3.54604 0.85384 7
 -7 -5 2 2.96479 0.77535 9
 6 5 -2 4.50115 0.70943 11
 6 5 -2 4.06004 0.82507 24
 6 5 -2 3.91391 1.09487 32
 6 5 -2 4.22262 0.7817 23
 6 5 -2 4.87558 0.91241 7
 6 5 -2 4.33562 0.56979 2
 6 5 -2 4.42932 0.66598 7
 6 5 -2 4.33004 1.04322 30
 6 5 -2 3.18358 0.52359 5
 -6 -5 2 4.63131 0.84407 7
 -6 -5 2 3.04037 0.68631 7
 -6 -5 2 4.92859 0.65614 4
 -6 -5 2 4.55124 0.88395 11
 -6 -5 2 4.39327 0.93539 24
 -6 -5 2 5.74525 0.73672 9
 -6 -5 2 4.22614 0.65463 18
 -6 -5 2 3.96046 1.02977 31
 -6 -5 2 3.32075 0.70516 13
 5 5 -2 8.37469 0.82121 11
 5 5 -2 6.89448 0.71152 7
 5 5 -2 7.84659 0.81797 7
 5 5 -2 7.8534 1.07758 32
 5 5 -2 7.36865 0.73062 23
 5 5 -2 7.58996 0.8065 5
 5 5 -2 7.54702 0.98396 30
 5 5 -2 8.17969 0.88245 24
 5 5 -2 8.04488 0.64602 26
 5 5 -2 7.47261 0.76436 2
 -5 -5 2 9.13937 1.06685 7
 -5 -5 2 7.06429 0.65223 4
 -5 -5 2 7.10294 0.90196 24
 -5 -5 2 8.56396 0.95698 9
 -5 -5 2 7.65749 0.67669 18
 -5 -5 2 5.8058 0.95563 31
 -5 -5 2 7.03978 0.86002 11
 -5 -5 2 7.66238 0.7992 13
 -5 -5 2 7.74816 0.76319 7
 4 5 -2 2.3355 0.49866 26
 4 5 -2 2.01997 0.69757 30
 4 5 -2 2.3434 0.5432 11
 4 5 -2 2.15606 0.38089 2
 4 5 -2 1.82379 0.51371 23
 4 5 -2 2.55492 0.4219 5
 4 5 -2 2.33371 0.5562 7
 4 5 -2 2.65396 0.58736 24
 4 5 -2 2.75 0.47964 7
 4 5 -2 2.54556 0.68886 32
 -4 -5 2 2.82544 0.49669 9
 -4 -5 2 3.49352 0.75318 31
 -4 -5 2 2.10056 0.65548 24
 -4 -5 2 1.84565 0.5425 11
 -4 -5 2 2.73103 0.53968 7
 -4 -5 2 1.98177 0.52468 13
 -4 -5 2 2.42502 0.4014 4
 -4 -5 2 2.2018 0.43479 7
 -4 -5 2 2.99143 0.35277 2
 3 5 -2 219.381 5.4286 2
[truncated: 2,333,030 more chars]
